# Supplementary material
Source: Research Square preprint supplement (doi:10.21203/rs.3.rs-9136973/v1)
Supplement: Supplementary file 1 [file 013feb7dd220636a24cf4d88.xlsx]

## Sheet: Sheet1
Sample	Genes	Ct	FC	Time	Viral_strain	Virulence	Pig	cluster
8h C1 Geo 1.5_1	A238L	15.4785	0.328922	8	Georgia 2007/1	Virulent	1	8
8h C1 Geo 1.5_1	B119L	12.9487	0.419427	8	Georgia 2007/1	Virulent	1	7
8h C1 Geo 1.5_1	C129R	11.0837	1.15965	8	Georgia 2007/1	Virulent	1	8
8h C1 Geo 1.5_1	DP96R	11.7904	0.478293	8	Georgia 2007/1	Virulent	1	8
8h C1 Geo 1.5_1	EP364R	12.9869	1.20564	8	Georgia 2007/1	Virulent	1	8
8h C1 Geo 1.5_1	H359L	13.1589	1.40618	8	Georgia 2007/1	Virulent	1	8
8h C1 Geo 1.5_1	K78R	10.2467	0.393783	8	Georgia 2007/1	Virulent	1	7
8h C1 Geo 1.5_1	MGF110-7L	10.7662	2.45561	8	Georgia 2007/1	Virulent	1	4
8h C1 Geo 1.5_1	MGF360-15R	11.7405	0.485726	8	Georgia 2007/1	Virulent	1	8
8h C1 Geo 1.5_1	MGF360-8L	13.7702	1.18473	8	Georgia 2007/1	Virulent	1	8
8h C1 Geo 1.5_1	MGF505-5R	14.7335	0.607823	8	Georgia 2007/1	Virulent	1	8
8h C1 Geo 1.5_1	A179L	11.7108	0.796934	8	Georgia 2007/1	Virulent	1	8
8h C1 Geo 1.5_1	B125R	12.9378	0.962319	8	Georgia 2007/1	Virulent	1	7
8h C1 Geo 1.5_1	C315R	12.6656	1.58272	8	Georgia 2007/1	Virulent	1	8
8h C1 Geo 1.5_1	E111R	10.9647	1.02535	8	Georgia 2007/1	Virulent	1	7
8h C1 Geo 1.5_1	EP424R	13.0689	0.424885	8	Georgia 2007/1	Virulent	1	8
8h C1 Geo 1.5_1	I196L	12.7578	0.675085	8	Georgia 2007/1	Virulent	1	7
8h C1 Geo 1.5_1	L60L	13.1975	0.219106	8	Georgia 2007/1	Virulent	1	8
8h C1 Geo 1.5_1	MGF300-2R	13.9931	0.75251	8	Georgia 2007/1	Virulent	1	8
8h C1 Geo 1.5_1	MGF360-16R	12.5753	0.679802	8	Georgia 2007/1	Virulent	1	8
8h C1 Geo 1.5_1	MGF360-9L	12.6033	1.95847	8	Georgia 2007/1	Virulent	1	8
8h C1 Geo 1.5_1	S183L	16.4122	0.406284	8	Georgia 2007/1	Virulent	1	7
8h C1 Geo 1.5_1	L83L	13.6673	0.127625	8	Georgia 2007/1	Virulent	1	8
8h C1 Geo 1.5_1	B263R	22.2272	1.89092	8	Georgia 2007/1	Virulent	1	5
8h C1 Geo 1.5_1	C475L	13.4856	1.0297	8	Georgia 2007/1	Virulent	1	8
8h C1 Geo 1.5_1	E146L	14.6434	0.808216	8	Georgia 2007/1	Virulent	1	8
8h C1 Geo 1.5_1	F165R	12.4244	0.935012	8	Georgia 2007/1	Virulent	1	7
8h C1 Geo 1.5_1	I215L	13.3473	0.32838	8	Georgia 2007/1	Virulent	1	8
8h C1 Geo 1.5_1	MGF100-1R	13.6418	1.02035	8	Georgia 2007/1	Virulent	1	8
8h C1 Geo 1.5_1	MGF360-10L	11.8548	4.19305	8	Georgia 2007/1	Virulent	1	1
8h C1 Geo 1.5_1	MGF360-1L	14.0545	1.28404	8	Georgia 2007/1	Virulent	1	8
8h C1 Geo 1.5_1	MGF505-10R	14.6686	0.431667	8	Georgia 2007/1	Virulent	1	8
8h C1 Geo 1.5_1	MGF505-9R	14.1316	0.405956	8	Georgia 2007/1	Virulent	1	8
8h C1 Geo 1.5_1	285L	13.1266	1.12666	8	Georgia 2007/1	Virulent	1	8
8h C1 Geo 1.5_1	C962R	10.991	5.05999	8	Georgia 2007/1	Virulent	1	3
8h C1 Geo 1.5_1	E184L	8.45883	4.01852	8	Georgia 2007/1	Virulent	1	3
8h C1 Geo 1.5_1	G-ACD-00600	10.6133	2.21139	8	Georgia 2007/1	Virulent	1
8h C1 Geo 1.5_1	I226R	11.184	3.4272	8	Georgia 2007/1	Virulent	1	3
8h C1 Geo 1.5_1	MGF100-1L	10.9023	0.498747	8	Georgia 2007/1	Virulent	1	6
8h C1 Geo 1.5_1	MGF360-11L	13.1015	3.36838	8	Georgia 2007/1	Virulent	1	1
8h C1 Geo 1.5_1	MGF360-21R	13.7521	3.61481	8	Georgia 2007/1	Virulent	1	5
8h C1 Geo 1.5_1	MGF505-11L	13.9324	0.652917	8	Georgia 2007/1	Virulent	1	8
8h C1 Geo 1.5_1	O61R	11.46	0.327225	8	Georgia 2007/1	Virulent	1	7
8h C1 Geo 1.5_1	I267L	13.2028	2.52348	8	Georgia 2007/1	Virulent	1	3
8h C1 Geo 1.5_1	E199L	17.9607	0.295713	8	Georgia 2007/1	Virulent	1	7
8h C1 Geo 1.5_1	CP312R	10.2058	0.593177	8	Georgia 2007/1	Virulent	1	8
8h C1 Geo 1.5_1	B354L	9.87581	1.83954	8	Georgia 2007/1	Virulent	1	8
8h C1 Geo 1.5_1	A104R	20.1541	0.000904873	8	Georgia 2007/1	Virulent	1	7
8h C1 Geo 1.5_1	CP204L	9.82638	0.339481	8	Georgia 2007/1	Virulent	1	8
8h C1 Geo 1.5_1	MGF505-1R	13.5562	2.28607	8	Georgia 2007/1	Virulent	1	2
8h C1 Geo 1.5_1	MGF360-12L	14.2462	1.15841	8	Georgia 2007/1	Virulent	1	5
8h C1 Geo 1.5_1	MGF100-3L	14.3266	0.256375	8	Georgia 2007/1	Virulent	1	8
8h C1 Geo 1.5_1	I329L	13.5293	0.740689	8	Georgia 2007/1	Virulent	1	8
8h C1 Geo 1.5_1	H171R	12.2718	2.52103	8	Georgia 2007/1	Virulent	1	3
8h C1 Geo 1.5_1	E248R	16.089	0.409207	8	Georgia 2007/1	Virulent	1	7
8h C1 Geo 1.5_1	CP80R	12.39	1.08498	8	Georgia 2007/1	Virulent	1	8
8h C1 Geo 1.5_1	B385R	14.6878	0.948729	8	Georgia 2007/1	Virulent	1	7
8h C1 Geo 1.5_1	A137R	8.82219	4.06081	8	Georgia 2007/1	Virulent	1	3
8h C1 Geo 1.5_1	B646L	11.7672	0.358429	8	Georgia 2007/1	Virulent	1	7
8h C1 Geo 1.5_1	MGF505-2R	15.3528	2.80402	8	Georgia 2007/1	Virulent	1	1
8h C1 Geo 1.5_1	MGF360-2L	13.1279	0.474305	8	Georgia 2007/1	Virulent	1	8
8h C1 Geo 1.5_1	MGF360-13L	15.2145	1.82957	8	Georgia 2007/1	Virulent	1	2
8h C1 Geo 1.5_1	MGF110-2L	14.3303	0.388738	8	Georgia 2007/1	Virulent	1	8
8h C1 Geo 1.5_1	I8L	13.3931	0.940308	8	Georgia 2007/1	Virulent	1	8
8h C1 Geo 1.5_1	H233R	9.63671	3.74401	8	Georgia 2007/1	Virulent	1	3
8h C1 Geo 1.5_1	E301R	15.2552	1.61815	8	Georgia 2007/1	Virulent	1	8
8h C1 Geo 1.5_1	B407L	10.865	2.17867	8	Georgia 2007/1	Virulent	1	8
8h C1 Geo 1.5_1	A151R	10.3067	0.675727	8	Georgia 2007/1	Virulent	1	8
8h C1 Geo 1.5_1	MGF505-7R	14.8188	0.374111	8	Georgia 2007/1	Virulent	1	8
8h C1 Geo 1.5_1	QP383R	16.0081	1.37345	8	Georgia 2007/1	Virulent	1	3
8h C1 Geo 1.5_1	MGF505-3R	14.4488	1.16597	8	Georgia 2007/1	Virulent	1
8h C1 Geo 1.5_1	MGF360-3L	11.6409	1.26929	8	Georgia 2007/1	Virulent	1	8
8h C1 Geo 1.5_1	K205R	9.6401	2.30078	8	Georgia 2007/1	Virulent	1	8
8h C1 Geo 1.5_1	H240R	9.86608	3.34408	8	Georgia 2007/1	Virulent	1	3
8h C1 Geo 1.5_1	DP238L	11.3819	1.1837	8	Georgia 2007/1	Virulent	1	8
8h C1 Geo 1.5_1	B475L	11.0795	1.65847	8	Georgia 2007/1	Virulent	1	8
8h C1 Geo 1.5_1	A224L	11.1262	0.750484	8	Georgia 2007/1	Virulent	1	8
8h C1 Geo 1.5_1	R298L	12.0631	4.61102	8	Georgia 2007/1	Virulent	1	3
8h C1 Geo 1.5_1	MGF505-4R	15.6048	0.451932	8	Georgia 2007/1	Virulent	1	8
8h C1 Geo 1.5_1	MGF360-4L	13.0862	2.05057	8	Georgia 2007/1	Virulent	1	8
8h C1 Geo 1.5_1	MGF360-14L	999	0	8	Georgia 2007/1	Virulent	1	2
8h C1 Geo 1.5_1	MGF110-4L	10.621	0.58174	8	Georgia 2007/1	Virulent	1	8
48h C1 883 0.5_1	A238L	11.3432	29.6267	48	OURT88/3	Attenuated	1	8
48h C1 883 0.5_1	B119L	9.36206	25.8268	48	OURT88/3	Attenuated	1	7
48h C1 883 0.5_1	C129R	9.2939	20.5509	48	OURT88/3	Attenuated	1	8
48h C1 883 0.5_1	DP96R	8.77505	19.8221	48	OURT88/3	Attenuated	1	8
48h C1 883 0.5_1	EP364R	11.2158	21.0913	48	OURT88/3	Attenuated	1	8
48h C1 883 0.5_1	H359L	11.4969	22.8079	48	OURT88/3	Attenuated	1	8
48h C1 883 0.5_1	K78R	7.37683	14.754	48	OURT88/3	Attenuated	1	7
48h C1 883 0.5_1	MGF110-7L	21.8514	0.00579339	48	OURT88/3	Attenuated	1	4
48h C1 883 0.5_1	MGF360-15R	8.74564	19.8457	48	OURT88/3	Attenuated	1	8
48h C1 883 0.5_1	MGF360-8L	11.6566	26.2788	48	OURT88/3	Attenuated	1	8
48h C1 883 0.5_1	MGF505-5R	11.683	25.8107	48	OURT88/3	Attenuated	1	8
48h C1 883 0.5_1	A179L	9.12994	24.4385	48	OURT88/3	Attenuated	1	8
48h C1 883 0.5_1	B125R	11.0968	17.6704	48	OURT88/3	Attenuated	1	7
48h C1 883 0.5_1	C315R	11.2169	22.1441	48	OURT88/3	Attenuated	1	8
48h C1 883 0.5_1	E111R	9.71539	12.4937	48	OURT88/3	Attenuated	1	7
48h C1 883 0.5_1	EP424R	9.85786	20.1656	48	OURT88/3	Attenuated	1	8
48h C1 883 0.5_1	I196L	10.2419	19.7895	48	OURT88/3	Attenuated	1	7
48h C1 883 0.5_1	L60L	8.81223	23.4685	48	OURT88/3	Attenuated	1	8
48h C1 883 0.5_1	MGF300-2R	11.226	26.2551	48	OURT88/3	Attenuated	1	8
48h C1 883 0.5_1	MGF360-16R	9.76994	24.3563	48	OURT88/3	Attenuated	1	8
48h C1 883 0.5_1	MGF360-9L	11.9549	15.7348	48	OURT88/3	Attenuated	1	8
48h C1 883 0.5_1	S183L	13.1733	19.6601	48	OURT88/3	Attenuated	1	7
48h C1 883 0.5_1	L83L	8.284	27.3021	48	OURT88/3	Attenuated	1	8
48h C1 883 0.5_1	B263R	21.7464	13.5248	48	OURT88/3	Attenuated	1	5
48h C1 883 0.5_1	C475L	11.4653	21.4089	48	OURT88/3	Attenuated	1	8
48h C1 883 0.5_1	E146L	12.9664	13.2462	48	OURT88/3	Attenuated	1	8
48h C1 883 0.5_1	F165R	10.5615	17.4321	48	OURT88/3	Attenuated	1	7
48h C1 883 0.5_1	I215L	9.58148	22.8948	48	OURT88/3	Attenuated	1	8
48h C1 883 0.5_1	MGF100-1R	11.2536	27.3792	48	OURT88/3	Attenuated	1	8
48h C1 883 0.5_1	MGF360-10L	25.1186	0.00218492	48	OURT88/3	Attenuated	1	1
48h C1 883 0.5_1	MGF360-1L	12.4446	20.0886	48	OURT88/3	Attenuated	1	8
48h C1 883 0.5_1	MGF505-10R	10.9147	29.8482	48	OURT88/3	Attenuated	1	8
48h C1 883 0.5_1	MGF505-9R	10.6455	23.3151	48	OURT88/3	Attenuated	1	8
48h C1 883 0.5_1	285L	11.4908	17.9451	48	OURT88/3	Attenuated	1	8
48h C1 883 0.5_1	C962R	11.3401	20.3607	48	OURT88/3	Attenuated	1	3
48h C1 883 0.5_1	E184L	9.0305	13.8583	48	OURT88/3	Attenuated	1	3
48h C1 883 0.5_1	G-ACD-00600	12.9479	2.24708	48	OURT88/3	Attenuated	1
48h C1 883 0.5_1	I226R	11.4081	15.0387	48	OURT88/3	Attenuated	1	3
48h C1 883 0.5_1	MGF100-1L	7.62917	0	48	OURT88/3	Attenuated	1	6
48h C1 883 0.5_1	MGF360-11L	22.4545	0.0264014	48	OURT88/3	Attenuated	1	1
48h C1 883 0.5_1	MGF360-21R	22.6044	0.0400881	48	OURT88/3	Attenuated	1	5
48h C1 883 0.5_1	MGF505-11L	11.1424	23.146	48	OURT88/3	Attenuated	1	8
48h C1 883 0.5_1	O61R	8.02856	18.0949	48	OURT88/3	Attenuated	1	7
48h C1 883 0.5_1	I267L	12.5693	20.064	48	OURT88/3	Attenuated	1	3
48h C1 883 0.5_1	E199L	14.7219	14.3074	48	OURT88/3	Attenuated	1	7
48h C1 883 0.5_1	CP312R	6.79391	32.3598	48	OURT88/3	Attenuated	1	8
48h C1 883 0.5_1	B354L	9.06397	16.5512	48	OURT88/3	Attenuated	1	8
48h C1 883 0.5_1	A104R	8.05175	20.3938	48	OURT88/3	Attenuated	1	7
48h C1 883 0.5_1	CP204L	5.7937	28.4775	48	OURT88/3	Attenuated	1	8
48h C1 883 0.5_1	MGF505-1R	22.8476	0.0186997	48	OURT88/3	Attenuated	1	2
48h C1 883 0.5_1	MGF360-12L	16.567	1.18838	48	OURT88/3	Attenuated	1	5
48h C1 883 0.5_1	MGF100-3L	9.66551	33.2465	48	OURT88/3	Attenuated	1	8
48h C1 883 0.5_1	I329L	11.0424	21.2818	48	OURT88/3	Attenuated	1	8
48h C1 883 0.5_1	H171R	12.1777	13.7921	48	OURT88/3	Attenuated	1	3
48h C1 883 0.5_1	E248R	13.3894	13.6243	48	OURT88/3	Attenuated	1	7
48h C1 883 0.5_1	CP80R	10.6868	18.1082	48	OURT88/3	Attenuated	1	8
48h C1 883 0.5_1	B385R	12.4651	22.6967	48	OURT88/3	Attenuated	1	7
48h C1 883 0.5_1	A137R	9.74774	10.9578	48	OURT88/3	Attenuated	1	3
48h C1 883 0.5_1	B646L	8.40524	18.8885	48	OURT88/3	Attenuated	1	7
48h C1 883 0.5_1	MGF505-2R	999	0	48	OURT88/3	Attenuated	1	1
48h C1 883 0.5_1	MGF360-2L	9.75792	25.134	48	OURT88/3	Attenuated	1	8
48h C1 883 0.5_1	MGF360-13L	999	0	48	OURT88/3	Attenuated	1	2
48h C1 883 0.5_1	MGF110-2L	10.7093	24.5139	48	OURT88/3	Attenuated	1	8
48h C1 883 0.5_1	I8L	10.8635	27.8274	48	OURT88/3	Attenuated	1	8
48h C1 883 0.5_1	H233R	10.3045	12.0795	48	OURT88/3	Attenuated	1	3
48h C1 883 0.5_1	E301R	14.1429	17.93	48	OURT88/3	Attenuated	1	8
48h C1 883 0.5_1	B407L	10.3045	16.4676	48	OURT88/3	Attenuated	1	8
48h C1 883 0.5_1	A151R	7.64662	21.8911	48	OURT88/3	Attenuated	1	8
48h C1 883 0.5_1	MGF505-7R	10.6672	34.0801	48	OURT88/3	Attenuated	1	8
48h C1 883 0.5_1	QP383R	14.757	16.7567	48	OURT88/3	Attenuated	1	3
48h C1 883 0.5_1	MGF505-3R	999	0	48	OURT88/3	Attenuated	1
48h C1 883 0.5_1	MGF360-3L	9.99205	20.3999	48	OURT88/3	Attenuated	1	8
48h C1 883 0.5_1	K205R	8.73591	22.0697	48	OURT88/3	Attenuated	1	8
48h C1 883 0.5_1	H240R	10.0553	15.0333	48	OURT88/3	Attenuated	1	3
48h C1 883 0.5_1	DP238L	9.27954	26.0518	48	OURT88/3	Attenuated	1	8
48h C1 883 0.5_1	B475L	9.89114	19.3712	48	OURT88/3	Attenuated	1	8
48h C1 883 0.5_1	A224L	8.45846	24.4418	48	OURT88/3	Attenuated	1	8
48h C1 883 0.5_1	R298L	12.7621	14.5584	48	OURT88/3	Attenuated	1	3
48h C1 883 0.5_1	MGF505-4R	12.469	20.3595	48	OURT88/3	Attenuated	1	8
48h C1 883 0.5_1	MGF360-4L	12.3243	17.8222	48	OURT88/3	Attenuated	1	8
48h C1 883 0.5_1	MGF360-14L	999	0	48	OURT88/3	Attenuated	1	2
48h C1 883 0.5_1	MGF110-4L	7.79039	21.2117	48	OURT88/3	Attenuated	1	8
4h C3 881 1.5_1	A238L	17.6731	0.0816772	4	OURT88/1	Virulent	3	8
4h C3 881 1.5_1	B119L	23.2471	0.000378578	4	OURT88/1	Virulent	3	7
4h C3 881 1.5_1	C129R	17.4831	0.015614	4	OURT88/1	Virulent	3	8
4h C3 881 1.5_1	DP96R	13.1619	0.210123	4	OURT88/1	Virulent	3	8
4h C3 881 1.5_1	EP364R	999	0	4	OURT88/1	Virulent	3	8
4h C3 881 1.5_1	H359L	17.9133	0.0592161	4	OURT88/1	Virulent	3	8
4h C3 881 1.5_1	K78R	16.0452	0.00804179	4	OURT88/1	Virulent	3	7
4h C3 881 1.5_1	MGF110-7L	999	0	4	OURT88/1	Virulent	3	4
4h C3 881 1.5_1	MGF360-15R	13.0497	0.222797	4	OURT88/1	Virulent	3	8
4h C3 881 1.5_1	MGF360-8L	17.9534	0.0741281	4	OURT88/1	Virulent	3	8
4h C3 881 1.5_1	MGF505-5R	16.5101	0.201642	4	OURT88/1	Virulent	3	8
4h C3 881 1.5_1	A179L	13.6784	0.2316	4	OURT88/1	Virulent	3	8
4h C3 881 1.5_1	B125R	22.4474	0.00150066	4	OURT88/1	Virulent	3	7
4h C3 881 1.5_1	C315R	17.5665	0.0602164	4	OURT88/1	Virulent	3	8
4h C3 881 1.5_1	E111R	17.2401	0.0150456	4	OURT88/1	Virulent	3	7
4h C3 881 1.5_1	EP424R	17.4502	0.0231729	4	OURT88/1	Virulent	3	8
4h C3 881 1.5_1	I196L	999	0	4	OURT88/1	Virulent	3	7
4h C3 881 1.5_1	L60L	18.9362	0.00466384	4	OURT88/1	Virulent	3	8
4h C3 881 1.5_1	MGF300-2R	17.1965	0.0928587	4	OURT88/1	Virulent	3	8
4h C3 881 1.5_1	MGF360-16R	12.5235	0.800946	4	OURT88/1	Virulent	3	8
4h C3 881 1.5_1	MGF360-9L	17.0978	0.0987582	4	OURT88/1	Virulent	3	8
4h C3 881 1.5_1	S183L	22.9783	0.00487366	4	OURT88/1	Virulent	3	7
4h C3 881 1.5_1	L83L	16.2886	0.0235748	4	OURT88/1	Virulent	3	8
4h C3 881 1.5_1	B263R	23.5308	0.87071	4	OURT88/1	Virulent	3	5
4h C3 881 1.5_1	C475L	21.3556	0.00500293	4	OURT88/1	Virulent	3	8
4h C3 881 1.5_1	E146L	23.2491	0.00235817	4	OURT88/1	Virulent	3	8
4h C3 881 1.5_1	F165R	999	0	4	OURT88/1	Virulent	3	7
4h C3 881 1.5_1	I215L	13.1357	0.432218	4	OURT88/1	Virulent	3	8
4h C3 881 1.5_1	MGF100-1R	999	0	4	OURT88/1	Virulent	3	8
4h C3 881 1.5_1	MGF360-10L	15.2607	0.449628	4	OURT88/1	Virulent	3	1
4h C3 881 1.5_1	MGF360-1L	18.69	0.0587173	4	OURT88/1	Virulent	3	8
4h C3 881 1.5_1	MGF505-10R	15.3064	0.315331	4	OURT88/1	Virulent	3	8
4h C3 881 1.5_1	MGF505-9R	14.3211	0.404611	4	OURT88/1	Virulent	3	8
4h C3 881 1.5_1	285L	15.7258	0.211327	4	OURT88/1	Virulent	3	8
4h C3 881 1.5_1	C962R	20.7919	0.00644733	4	OURT88/1	Virulent	3	3
4h C3 881 1.5_1	E184L	23.41	0.000144191	4	OURT88/1	Virulent	3	3
4h C3 881 1.5_1	G-ACD-00600	16.1131	0.0555522	4	OURT88/1	Virulent	3
4h C3 881 1.5_1	I226R	22.3509	0.00169435	4	OURT88/1	Virulent	3	3
4h C3 881 1.5_1	MGF100-1L	10.7146	0	4	OURT88/1	Virulent	3	6
4h C3 881 1.5_1	MGF360-11L	16.0451	0.497653	4	OURT88/1	Virulent	3	1
4h C3 881 1.5_1	MGF360-21R	24.1762	0.00299052	4	OURT88/1	Virulent	3	5
4h C3 881 1.5_1	MGF505-11L	15.6059	0.232654	4	OURT88/1	Virulent	3	8
4h C3 881 1.5_1	O61R	21.6173	0.000325718	4	OURT88/1	Virulent	3	7
4h C3 881 1.5_1	I267L	17.4191	0.154302	4	OURT88/1	Virulent	3	3
4h C3 881 1.5_1	E199L	999	0	4	OURT88/1	Virulent	3	7
4h C3 881 1.5_1	CP312R	12.7101	0.118837	4	OURT88/1	Virulent	3	8
4h C3 881 1.5_1	B354L	20.346	0.001474	4	OURT88/1	Virulent	3	8
4h C3 881 1.5_1	A104R	14.259	0.0612078	4	OURT88/1	Virulent	3	7
4h C3 881 1.5_1	CP204L	10.5872	0.227718	4	OURT88/1	Virulent	3	8
4h C3 881 1.5_1	MGF505-1R	17.6101	0.156446	4	OURT88/1	Virulent	3	2
4h C3 881 1.5_1	MGF360-12L	15.3337	0.619606	4	OURT88/1	Virulent	3	5
4h C3 881 1.5_1	MGF100-3L	14.5792	0.244599	4	OURT88/1	Virulent	3	8
4h C3 881 1.5_1	I329L	15.62	0.197654	4	OURT88/1	Virulent	3	8
4h C3 881 1.5_1	H171R	999	0	4	OURT88/1	Virulent	3	3
4h C3 881 1.5_1	E248R	21.8272	0.00871297	4	OURT88/1	Virulent	3	7
4h C3 881 1.5_1	CP80R	17.9872	0.0254759	4	OURT88/1	Virulent	3	8
4h C3 881 1.5_1	B385R	999	0	4	OURT88/1	Virulent	3	7
4h C3 881 1.5_1	A137R	999	0	4	OURT88/1	Virulent	3	3
4h C3 881 1.5_1	B646L	999	0	4	OURT88/1	Virulent	3	7
4h C3 881 1.5_1	MGF505-2R	21.6064	0.0417725	4	OURT88/1	Virulent	3	1
4h C3 881 1.5_1	MGF360-2L	18.826	0.0103848	4	OURT88/1	Virulent	3	8
4h C3 881 1.5_1	MGF360-13L	18.6591	0.191006	4	OURT88/1	Virulent	3	2
4h C3 881 1.5_1	MGF110-2L	24.0458	0.000525578	4	OURT88/1	Virulent	3	8
4h C3 881 1.5_1	I8L	14.6323	0.452748	4	OURT88/1	Virulent	3	8
4h C3 881 1.5_1	H233R	22.929	0.000424218	4	OURT88/1	Virulent	3	3
4h C3 881 1.5_1	E301R	23.5236	0.0059648	4	OURT88/1	Virulent	3	8
4h C3 881 1.5_1	B407L	999	0	4	OURT88/1	Virulent	3	8
4h C3 881 1.5_1	A151R	12.5306	0.164417	4	OURT88/1	Virulent	3	8
4h C3 881 1.5_1	MGF505-7R	14.0207	0.739413	4	OURT88/1	Virulent	3	8
4h C3 881 1.5_1	QP383R	999	0	4	OURT88/1	Virulent	3	3
4h C3 881 1.5_1	MGF505-3R	13.8601	1.99308	4	OURT88/1	Virulent	3
4h C3 881 1.5_1	MGF360-3L	17.8671	0.019271	4	OURT88/1	Virulent	3	8
4h C3 881 1.5_1	K205R	13.5011	0.179975	4	OURT88/1	Virulent	3	8
4h C3 881 1.5_1	H240R	20.1807	0.00298456	4	OURT88/1	Virulent	3	3
4h C3 881 1.5_1	DP238L	13.2973	0.356664	4	OURT88/1	Virulent	3	8
4h C3 881 1.5_1	B475L	20.0296	0.00381122	4	OURT88/1	Virulent	3	8
4h C3 881 1.5_1	A224L	13.1742	0.206271	4	OURT88/1	Virulent	3	8
4h C3 881 1.5_1	R298L	21.9516	0.00552961	4	OURT88/1	Virulent	3	3
4h C3 881 1.5_1	MGF505-4R	18.0259	0.0959079	4	OURT88/1	Virulent	3	8
4h C3 881 1.5_1	MGF360-4L	19.1041	0.0359693	4	OURT88/1	Virulent	3	8
4h C3 881 1.5_1	MGF360-14L	18.3142	0.39402	4	OURT88/1	Virulent	3	2
4h C3 881 1.5_1	MGF110-4L	999	0	4	OURT88/1	Virulent	3	8
48h C1 L60 1.5_1	A238L	13.0462	4.19911	48	L60	Virulent	1	8
48h C1 L60 1.5_1	B119L	11.5042	2.69988	48	L60	Virulent	1	7
48h C1 L60 1.5_1	C129R	10.4004	4.40434	48	L60	Virulent	1	8
48h C1 L60 1.5_1	DP96R	9.41017	5.8897	48	L60	Virulent	1	8
48h C1 L60 1.5_1	EP364R	12.3005	4.58892	48	L60	Virulent	1	8
48h C1 L60 1.5_1	H359L	12.966	3.80177	48	L60	Virulent	1	8
48h C1 L60 1.5_1	K78R	7.96167	4.53928	48	L60	Virulent	1	7
48h C1 L60 1.5_1	MGF110-7L	999	0	48	L60	Virulent	1	4
48h C1 L60 1.5_1	MGF360-15R	9.38235	5.89022	48	L60	Virulent	1	8
48h C1 L60 1.5_1	MGF360-8L	13.1456	4.32032	48	L60	Virulent	1	8
48h C1 L60 1.5_1	MGF505-5R	13.0439	4.63712	48	L60	Virulent	1	8
48h C1 L60 1.5_1	A179L	10.7271	3.72736	48	L60	Virulent	1	8
48h C1 L60 1.5_1	B125R	11.5477	5.96559	48	L60	Virulent	1	7
48h C1 L60 1.5_1	C315R	12.9273	3.1225	48	L60	Virulent	1	8
48h C1 L60 1.5_1	E111R	10.1486	4.26991	48	L60	Virulent	1	7
48h C1 L60 1.5_1	EP424R	11.0868	3.9701	48	L60	Virulent	1	8
48h C1 L60 1.5_1	I196L	10.8821	5.85933	48	L60	Virulent	1	7
48h C1 L60 1.5_1	L60L	10.3647	3.69207	48	L60	Virulent	1	8
48h C1 L60 1.5_1	MGF300-2R	12.3864	5.42055	48	L60	Virulent	1	8
48h C1 L60 1.5_1	MGF360-16R	11.2413	4.05339	48	L60	Virulent	1	8
48h C1 L60 1.5_1	MGF360-9L	12.7767	4.10764	48	L60	Virulent	1	8
48h C1 L60 1.5_1	S183L	13.9288	5.3738	48	L60	Virulent	1	7
48h C1 L60 1.5_1	L83L	9.96121	3.93948	48	L60	Virulent	1	8
48h C1 L60 1.5_1	B263R	22.2453	4.41658	48	L60	Virulent	1	5
48h C1 L60 1.5_1	C475L	12.6348	4.39232	48	L60	Virulent	1	8
48h C1 L60 1.5_1	E146L	13.4451	4.38636	48	L60	Virulent	1	8
48h C1 L60 1.5_1	F165R	11.8529	3.28639	48	L60	Virulent	1	7
48h C1 L60 1.5_1	I215L	12.1045	1.83803	48	L60	Virulent	1	8
48h C1 L60 1.5_1	MGF100-1R	999	0	48	L60	Virulent	1	8
48h C1 L60 1.5_1	MGF360-10L	12.272	7.42641	48	L60	Virulent	1	1
48h C1 L60 1.5_1	MGF360-1L	13.7796	3.67445	48	L60	Virulent	1	8
48h C1 L60 1.5_1	MGF505-10R	12.7686	3.81028	48	L60	Virulent	1	8
48h C1 L60 1.5_1	MGF505-9R	12.3275	3.35298	48	L60	Virulent	1	8
48h C1 L60 1.5_1	285L	12.0095	5.77979	48	L60	Virulent	1	8
48h C1 L60 1.5_1	C962R	12.8886	3.21189	48	L60	Virulent	1	3
48h C1 L60 1.5_1	E184L	9.61438	4.26653	48	L60	Virulent	1	3
48h C1 L60 1.5_1	G-ACD-00600	14.5492	0.341765	48	L60	Virulent	1
48h C1 L60 1.5_1	I226R	12.1983	4.01309	48	L60	Virulent	1	3
48h C1 L60 1.5_1	MGF100-1L	9.35894	0	48	L60	Virulent	1	6
48h C1 L60 1.5_1	MGF360-11L	13.1432	7.74027	48	L60	Virulent	1	1
48h C1 L60 1.5_1	MGF360-21R	999	0	48	L60	Virulent	1	5
48h C1 L60 1.5_1	MGF505-11L	12.4442	4.33246	48	L60	Virulent	1	8
48h C1 L60 1.5_1	O61R	8.86702	4.66969	48	L60	Virulent	1	7
48h C1 L60 1.5_1	I267L	13.4923	4.88343	48	L60	Virulent	1	3
48h C1 L60 1.5_1	E199L	15.5154	3.80905	48	L60	Virulent	1	7
48h C1 L60 1.5_1	CP312R	8.48391	4.62804	48	L60	Virulent	1	8
48h C1 L60 1.5_1	B354L	10.1514	3.5942	48	L60	Virulent	1	8
48h C1 L60 1.5_1	A104R	8.73703	5.8525	48	L60	Virulent	1	7
48h C1 L60 1.5_1	CP204L	7.43973	4.19889	48	L60	Virulent	1	8
48h C1 L60 1.5_1	MGF505-1R	12.8817	8.62996	48	L60	Virulent	1	2
48h C1 L60 1.5_1	MGF360-12L	13.2587	5.43239	48	L60	Virulent	1	5
48h C1 L60 1.5_1	MGF100-3L	10.6442	7.78489	48	L60	Virulent	1	8
48h C1 L60 1.5_1	I329L	12.9369	2.6414	48	L60	Virulent	1	8
48h C1 L60 1.5_1	H171R	12.4526	5.26042	48	L60	Virulent	1	3
48h C1 L60 1.5_1	E248R	13.8302	4.63185	48	L60	Virulent	1	7
48h C1 L60 1.5_1	CP80R	11.487	4.7987	48	L60	Virulent	1	8
48h C1 L60 1.5_1	B385R	13.8764	3.93787	48	L60	Virulent	1	7
48h C1 L60 1.5_1	A137R	9.38805	6.48838	48	L60	Virulent	1	3
48h C1 L60 1.5_1	B646L	9.65945	3.65408	48	L60	Virulent	1	7
48h C1 L60 1.5_1	MGF505-2R	14.2727	14.0218	48	L60	Virulent	1	1
48h C1 L60 1.5_1	MGF360-2L	11.7037	3.01062	48	L60	Virulent	1	8
48h C1 L60 1.5_1	MGF360-13L	13.9946	10.0798	48	L60	Virulent	1	2
48h C1 L60 1.5_1	MGF110-2L	24.3744	0.000870877	48	L60	Virulent	1	8
48h C1 L60 1.5_1	I8L	12.1865	5.13273	48	L60	Virulent	1	8
48h C1 L60 1.5_1	H233R	10.7684	4.04139	48	L60	Virulent	1	3
48h C1 L60 1.5_1	E301R	14.9941	4.58649	48	L60	Virulent	1	8
48h C1 L60 1.5_1	B407L	11.0598	4.50204	48	L60	Virulent	1	8
48h C1 L60 1.5_1	A151R	8.96506	4.05052	48	L60	Virulent	1	8
48h C1 L60 1.5_1	MGF505-7R	12.7189	3.79329	48	L60	Virulent	1	8
48h C1 L60 1.5_1	QP383R	15.5881	4.34622	48	L60	Virulent	1	3
48h C1 L60 1.5_1	MGF505-3R	12.4433	11.0724	48	L60	Virulent	1
48h C1 L60 1.5_1	MGF360-3L	10.8918	5.04552	48	L60	Virulent	1	8
48h C1 L60 1.5_1	K205R	10.2145	3.65442	48	L60	Virulent	1	8
48h C1 L60 1.5_1	H240R	10.5585	4.89442	48	L60	Virulent	1	3
48h C1 L60 1.5_1	DP238L	11.0677	3.48075	48	L60	Virulent	1	8
48h C1 L60 1.5_1	B475L	11.0042	4.1325	48	L60	Virulent	1	8
48h C1 L60 1.5_1	A224L	9.88287	4.2022	48	L60	Virulent	1	8
48h C1 L60 1.5_1	R298L	13.3894	4.34915	48	L60	Virulent	1	3
48h C1 L60 1.5_1	MGF505-4R	13.2653	5.40995	48	L60	Virulent	1	8
48h C1 L60 1.5_1	MGF360-4L	13.1023	4.79623	48	L60	Virulent	1	8
48h C1 L60 1.5_1	MGF360-14L	13.1626	29.1439	48	L60	Virulent	1	2
48h C1 L60 1.5_1	MGF110-4L	999	0	48	L60	Virulent	1	8
4h C2 L60 0.5_1	A238L	17.8124	0.0588405	4	L60	Virulent	2	8
4h C2 L60 0.5_1	B119L	20.9486	0.00147774	4	L60	Virulent	2	7
4h C2 L60 0.5_1	C129R	18.9541	0.00446943	4	L60	Virulent	2	8
4h C2 L60 0.5_1	DP96R	13.9914	0.0938223	4	L60	Virulent	2	8
4h C2 L60 0.5_1	EP364R	999	0	4	L60	Virulent	2	8
4h C2 L60 0.5_1	H359L	20.0007	0.0110565	4	L60	Virulent	2	8
4h C2 L60 0.5_1	K78R	16.9604	0.00338374	4	L60	Virulent	2	7
4h C2 L60 0.5_1	MGF110-7L	999	0	4	L60	Virulent	2	4
4h C2 L60 0.5_1	MGF360-15R	13.918	0.0968402	4	L60	Virulent	2	8
4h C2 L60 0.5_1	MGF360-8L	20.6946	0.00879679	4	L60	Virulent	2	8
4h C2 L60 0.5_1	MGF505-5R	17.9453	0.0591698	4	L60	Virulent	2	8
4h C2 L60 0.5_1	A179L	15.0819	0.0694689	4	L60	Virulent	2	8
4h C2 L60 0.5_1	B125R	999	0	4	L60	Virulent	2	7
4h C2 L60 0.5_1	C315R	18.925	0.0186343	4	L60	Virulent	2	8
4h C2 L60 0.5_1	E111R	18.9256	0.00371175	4	L60	Virulent	2	7
4h C2 L60 0.5_1	EP424R	20.0073	0.00312421	4	L60	Virulent	2	8
4h C2 L60 0.5_1	I196L	23.5649	0.000339817	4	L60	Virulent	2	7
4h C2 L60 0.5_1	L60L	19.6031	0.00233093	4	L60	Virulent	2	8
4h C2 L60 0.5_1	MGF300-2R	18.9231	0.0222627	4	L60	Virulent	2	8
4h C2 L60 0.5_1	MGF360-16R	14.0977	0.213431	4	L60	Virulent	2	8
4h C2 L60 0.5_1	MGF360-9L	18.8152	0.0238294	4	L60	Virulent	2	8
4h C2 L60 0.5_1	S183L	21.8286	0.00858038	4	L60	Virulent	2	7
4h C2 L60 0.5_1	L83L	16.9799	0.0115847	4	L60	Virulent	2	8
4h C2 L60 0.5_1	B263R	21.142	3.61824	4	L60	Virulent	2	5
4h C2 L60 0.5_1	C475L	23.2349	0.00107905	4	L60	Virulent	2	8
4h C2 L60 0.5_1	E146L	22.499	0.00314707	4	L60	Virulent	2	8
4h C2 L60 0.5_1	F165R	999	0	4	L60	Virulent	2	7
4h C2 L60 0.5_1	I215L	14.0066	0.187535	4	L60	Virulent	2	8
4h C2 L60 0.5_1	MGF100-1R	999	0	4	L60	Virulent	2	8
4h C2 L60 0.5_1	MGF360-10L	16.4846	0.152748	4	L60	Virulent	2	1
4h C2 L60 0.5_1	MGF360-1L	19.8597	0.0207103	4	L60	Virulent	2	8
4h C2 L60 0.5_1	MGF505-10R	16.2447	0.13057	4	L60	Virulent	2	8
4h C2 L60 0.5_1	MGF505-9R	15.3633	0.155898	4	L60	Virulent	2	8
4h C2 L60 0.5_1	285L	16.4171	0.103849	4	L60	Virulent	2	8
4h C2 L60 0.5_1	C962R	20.9052	0.00472943	4	L60	Virulent	2	3
4h C2 L60 0.5_1	E184L	999	0	4	L60	Virulent	2	3
4h C2 L60 0.5_1	G-ACD-00600	17.473	0.0171737	4	L60	Virulent	2
4h C2 L60 0.5_1	I226R	999	0	4	L60	Virulent	2	3
4h C2 L60 0.5_1	MGF100-1L	12.0467	0	4	L60	Virulent	2	6
4h C2 L60 0.5_1	MGF360-11L	17.8987	0.10927	4	L60	Virulent	2	1
4h C2 L60 0.5_1	MGF360-21R	999	0	4	L60	Virulent	2	5
4h C2 L60 0.5_1	MGF505-11L	17.6213	0.0456611	4	L60	Virulent	2	8
4h C2 L60 0.5_1	O61R	20.5352	0.00054715	4	L60	Virulent	2	7
4h C2 L60 0.5_1	I267L	18.5744	0.0549709	4	L60	Virulent	2	3
4h C2 L60 0.5_1	E199L	999	0	4	L60	Virulent	2	7
4h C2 L60 0.5_1	CP312R	14.0517	0.0372067	4	L60	Virulent	2	8
4h C2 L60 0.5_1	B354L	21.4514	0.000543568	4	L60	Virulent	2	8
4h C2 L60 0.5_1	A104R	15.7399	0.0174002	4	L60	Virulent	2	7
4h C2 L60 0.5_1	CP204L	11.8388	0.0758856	4	L60	Virulent	2	8
4h C2 L60 0.5_1	MGF505-1R	17.5532	0.129135	4	L60	Virulent	2	2
4h C2 L60 0.5_1	MGF360-12L	15.9215	0.327122	4	L60	Virulent	2	5
4h C2 L60 0.5_1	MGF100-3L	15.9616	0.0744484	4	L60	Virulent	2	8
4h C2 L60 0.5_1	I329L	17.0729	0.0572864	4	L60	Virulent	2	8
4h C2 L60 0.5_1	H171R	999	0	4	L60	Virulent	2	3
4h C2 L60 0.5_1	E248R	999	0	4	L60	Virulent	2	7
4h C2 L60 0.5_1	CP80R	19.2151	0.00863044	4	L60	Virulent	2	8
4h C2 L60 0.5_1	B385R	999	0	4	L60	Virulent	2	7
4h C2 L60 0.5_1	A137R	999	0	4	L60	Virulent	2	3
4h C2 L60 0.5_1	B646L	999	0	4	L60	Virulent	2	7
4h C2 L60 0.5_1	MGF505-2R	999	0	4	L60	Virulent	2	1
4h C2 L60 0.5_1	MGF360-2L	18.6576	0.00926043	4	L60	Virulent	2	8
4h C2 L60 0.5_1	MGF360-13L	21.6035	0.0196892	4	L60	Virulent	2	2
4h C2 L60 0.5_1	MGF110-2L	22.8661	0.00094466	4	L60	Virulent	2	8
4h C2 L60 0.5_1	I8L	16.0805	0.131653	4	L60	Virulent	2	8
4h C2 L60 0.5_1	H233R	999	0	4	L60	Virulent	2	3
4h C2 L60 0.5_1	E301R	21.2941	0.022196	4	L60	Virulent	2	8
4h C2 L60 0.5_1	B407L	999	0	4	L60	Virulent	2	8
4h C2 L60 0.5_1	A151R	13.9881	0.0475037	4	L60	Virulent	2	8
4h C2 L60 0.5_1	MGF505-7R	14.6792	0.371686	4	L60	Virulent	2	8
4h C2 L60 0.5_1	QP383R	999	0	4	L60	Virulent	2	3
4h C2 L60 0.5_1	MGF505-3R	15.0271	0.704294	4	L60	Virulent	2
4h C2 L60 0.5_1	MGF360-3L	19.098	0.00651474	4	L60	Virulent	2	8
4h C2 L60 0.5_1	K205R	14.9364	0.0528051	4	L60	Virulent	2	8
4h C2 L60 0.5_1	H240R	23.0582	0.000322269	4	L60	Virulent	2	3
4h C2 L60 0.5_1	DP238L	14.5	0.122953	4	L60	Virulent	2	8
4h C2 L60 0.5_1	B475L	999	0	4	L60	Virulent	2	8
4h C2 L60 0.5_1	A224L	14.4368	0.0682175	4	L60	Virulent	2	8
4h C2 L60 0.5_1	R298L	999	0	4	L60	Virulent	2	3
4h C2 L60 0.5_1	MGF505-4R	19.2218	0.0332207	4	L60	Virulent	2	8
4h C2 L60 0.5_1	MGF360-4L	20.7641	0.00903144	4	L60	Virulent	2	8
4h C2 L60 0.5_1	MGF360-14L	19.7004	0.11961	4	L60	Virulent	2	2
4h C2 L60 0.5_1	MGF110-4L	999	0	4	L60	Virulent	2	8
24h C3 883 0.5_1	A238L	13.0975	2.70594	24	OURT88/3	Attenuated	3	8
24h C3 883 0.5_1	B119L	9.76659	6.01225	24	OURT88/3	Attenuated	3	7
24h C3 883 0.5_1	C129R	10.1136	3.5878	24	OURT88/3	Attenuated	3	8
24h C3 883 0.5_1	DP96R	10.4317	1.93732	24	OURT88/3	Attenuated	3	8
24h C3 883 0.5_1	EP364R	12.2589	3.15384	24	OURT88/3	Attenuated	3	8
24h C3 883 0.5_1	H359L	12.7875	2.87279	24	OURT88/3	Attenuated	3	8
24h C3 883 0.5_1	K78R	7.38196	4.53006	24	OURT88/3	Attenuated	3	7
24h C3 883 0.5_1	MGF110-7L	999	0	24	OURT88/3	Attenuated	3	4
24h C3 883 0.5_1	MGF360-15R	10.3473	2.01488	24	OURT88/3	Attenuated	3	8
24h C3 883 0.5_1	MGF360-8L	13.4954	2.26369	24	OURT88/3	Attenuated	3	8
24h C3 883 0.5_1	MGF505-5R	13.851	1.76971	24	OURT88/3	Attenuated	3	8
24h C3 883 0.5_1	A179L	10.9887	2.07615	24	OURT88/3	Attenuated	3	8
24h C3 883 0.5_1	B125R	11.9997	2.912	24	OURT88/3	Attenuated	3	7
24h C3 883 0.5_1	C315R	12.3875	3.03105	24	OURT88/3	Attenuated	3	8
24h C3 883 0.5_1	E111R	9.56125	4.28383	24	OURT88/3	Attenuated	3	7
24h C3 883 0.5_1	EP424R	10.6737	3.52985	24	OURT88/3	Attenuated	3	8
24h C3 883 0.5_1	I196L	11.0843	3.40099	24	OURT88/3	Attenuated	3	7
24h C3 883 0.5_1	L60L	9.83778	3.55228	24	OURT88/3	Attenuated	3	8
24h C3 883 0.5_1	MGF300-2R	13.445	1.73767	24	OURT88/3	Attenuated	3	8
24h C3 883 0.5_1	MGF360-16R	11.6508	2.03785	24	OURT88/3	Attenuated	3	8
24h C3 883 0.5_1	MGF360-9L	13.2413	1.98765	24	OURT88/3	Attenuated	3	8
24h C3 883 0.5_1	S183L	14.0445	3.3117	24	OURT88/3	Attenuated	3	7
24h C3 883 0.5_1	L83L	9.5547	3.48673	24	OURT88/3	Attenuated	3	8
24h C3 883 0.5_1	B263R	22.7616	2.06186	24	OURT88/3	Attenuated	3	5
24h C3 883 0.5_1	C475L	12.2079	3.94284	24	OURT88/3	Attenuated	3	8
24h C3 883 0.5_1	E146L	13.7347	2.39631	24	OURT88/3	Attenuated	3	8
24h C3 883 0.5_1	F165R	10.9421	4.12594	24	OURT88/3	Attenuated	3	7
24h C3 883 0.5_1	I215L	11.3242	2.10802	24	OURT88/3	Attenuated	3	8
24h C3 883 0.5_1	MGF100-1R	12.8905	2.71269	24	OURT88/3	Attenuated	3	8
24h C3 883 0.5_1	MGF360-10L	27.3427	0.000144099	24	OURT88/3	Attenuated	3	1
24h C3 883 0.5_1	MGF360-1L	14.9871	1.06247	24	OURT88/3	Attenuated	3	8
24h C3 883 0.5_1	MGF505-10R	12.6547	2.75336	24	OURT88/3	Attenuated	3	8
24h C3 883 0.5_1	MGF505-9R	12.4978	1.98964	24	OURT88/3	Attenuated	3	8
24h C3 883 0.5_1	285L	13.9685	0.992709	24	OURT88/3	Attenuated	3	8
24h C3 883 0.5_1	C962R	12.3732	3.06578	24	OURT88/3	Attenuated	3	3
24h C3 883 0.5_1	E184L	9.43739	3.22079	24	OURT88/3	Attenuated	3	3
24h C3 883 0.5_1	G-ACD-00600	15.5082	0.117389	24	OURT88/3	Attenuated	3
24h C3 883 0.5_1	I226R	11.8363	3.44381	24	OURT88/3	Attenuated	3	3
24h C3 883 0.5_1	MGF100-1L	10.2384	0	24	OURT88/3	Attenuated	3	6
24h C3 883 0.5_1	MGF360-11L	999	0	24	OURT88/3	Attenuated	3	1
24h C3 883 0.5_1	MGF360-21R	999	0	24	OURT88/3	Attenuated	3	5
24h C3 883 0.5_1	MGF505-11L	12.9905	1.98103	24	OURT88/3	Attenuated	3	8
24h C3 883 0.5_1	O61R	8.43137	4.21736	24	OURT88/3	Attenuated	3	7
24h C3 883 0.5_1	I267L	14.0219	2.25889	24	OURT88/3	Attenuated	3	3
24h C3 883 0.5_1	E199L	15.4075	2.741	24	OURT88/3	Attenuated	3	7
24h C3 883 0.5_1	CP312R	10.0053	1.07651	24	OURT88/3	Attenuated	3	8
24h C3 883 0.5_1	B354L	9.5951	3.52928	24	OURT88/3	Attenuated	3	8
24h C3 883 0.5_1	A104R	8.71918	3.95662	24	OURT88/3	Attenuated	3	7
24h C3 883 0.5_1	CP204L	9.02109	0.936922	24	OURT88/3	Attenuated	3	8
24h C3 883 0.5_1	MGF505-1R	999	0	24	OURT88/3	Attenuated	3	2
24h C3 883 0.5_1	MGF360-12L	17.3746	0.209216	24	OURT88/3	Attenuated	3	5
24h C3 883 0.5_1	MGF100-3L	12.3256	1.62079	24	OURT88/3	Attenuated	3	8
24h C3 883 0.5_1	I329L	12.0319	3.3026	24	OURT88/3	Attenuated	3	8
24h C3 883 0.5_1	H171R	12.4323	3.56232	24	OURT88/3	Attenuated	3	3
24h C3 883 0.5_1	E248R	13.8588	3.03214	24	OURT88/3	Attenuated	3	7
24h C3 883 0.5_1	CP80R	11.4078	3.38515	24	OURT88/3	Attenuated	3	8
24h C3 883 0.5_1	B385R	13.5498	3.2975	24	OURT88/3	Attenuated	3	7
24h C3 883 0.5_1	A137R	10.1252	2.59916	24	OURT88/3	Attenuated	3	3
24h C3 883 0.5_1	B646L	8.75286	4.57401	24	OURT88/3	Attenuated	3	7
24h C3 883 0.5_1	MGF505-2R	999	0	24	OURT88/3	Attenuated	3	1
24h C3 883 0.5_1	MGF360-2L	10.5381	4.50957	24	OURT88/3	Attenuated	3	8
24h C3 883 0.5_1	MGF360-13L	999	0	24	OURT88/3	Attenuated	3	2
24h C3 883 0.5_1	MGF110-2L	13.5179	1.07816	24	OURT88/3	Attenuated	3	8
24h C3 883 0.5_1	I8L	12.9859	1.96941	24	OURT88/3	Attenuated	3	8
24h C3 883 0.5_1	H233R	10.5005	3.24925	24	OURT88/3	Attenuated	3	3
24h C3 883 0.5_1	E301R	14.6426	3.90747	24	OURT88/3	Attenuated	3	8
24h C3 883 0.5_1	B407L	10.5662	4.23259	24	OURT88/3	Attenuated	3	8
24h C3 883 0.5_1	A151R	9.08862	2.48271	24	OURT88/3	Attenuated	3	8
24h C3 883 0.5_1	MGF505-7R	13.4563	1.51929	24	OURT88/3	Attenuated	3	8
24h C3 883 0.5_1	QP383R	15.4811	3.12572	24	OURT88/3	Attenuated	3	3
24h C3 883 0.5_1	MGF505-3R	999	0	24	OURT88/3	Attenuated	3
24h C3 883 0.5_1	MGF360-3L	11.3203	2.50345	24	OURT88/3	Attenuated	3	8
24h C3 883 0.5_1	K205R	10.4245	2.10972	24	OURT88/3	Attenuated	3	8
24h C3 883 0.5_1	H240R	10.5243	3.34667	24	OURT88/3	Attenuated	3	3
24h C3 883 0.5_1	DP238L	11.6975	1.50213	24	OURT88/3	Attenuated	3	8
24h C3 883 0.5_1	B475L	10.3473	4.35102	24	OURT88/3	Attenuated	3	8
24h C3 883 0.5_1	A224L	9.94421	2.68917	24	OURT88/3	Attenuated	3	8
24h C3 883 0.5_1	R298L	12.9468	3.94679	24	OURT88/3	Attenuated	3	3
24h C3 883 0.5_1	MGF505-4R	13.7438	2.5927	24	OURT88/3	Attenuated	3	8
24h C3 883 0.5_1	MGF360-4L	13.8488	1.90883	24	OURT88/3	Attenuated	3	8
24h C3 883 0.5_1	MGF360-14L	999	0	24	OURT88/3	Attenuated	3	2
24h C3 883 0.5_1	MGF110-4L	9.2081	2.44648	24	OURT88/3	Attenuated	3	8
2h C2 883 0.5_1	A238L	17.8728	0.0417625	2	OURT88/3	Attenuated	2	8
2h C2 883 0.5_1	B119L	21.2045	0.000915924	2	OURT88/3	Attenuated	2	7
2h C2 883 0.5_1	C129R	999	0	2	OURT88/3	Attenuated	2	8
2h C2 883 0.5_1	DP96R	17.186	0.00758422	2	OURT88/3	Attenuated	2	8
2h C2 883 0.5_1	EP364R	999	0	2	OURT88/3	Attenuated	2	8
2h C2 883 0.5_1	H359L	20.1221	0.00752241	2	OURT88/3	Attenuated	2	8
2h C2 883 0.5_1	K78R	21.6334	9.81661e-05	2	OURT88/3	Attenuated	2	7
2h C2 883 0.5_1	MGF110-7L	999	0	2	OURT88/3	Attenuated	2	4
2h C2 883 0.5_1	MGF360-15R	17.0001	0.00846312	2	OURT88/3	Attenuated	2	8
2h C2 883 0.5_1	MGF360-8L	999	0	2	OURT88/3	Attenuated	2	8
2h C2 883 0.5_1	MGF505-5R	999	0	2	OURT88/3	Attenuated	2	8
2h C2 883 0.5_1	A179L	18.1459	0.00614765	2	OURT88/3	Attenuated	2	8
2h C2 883 0.5_1	B125R	999	0	2	OURT88/3	Attenuated	2	7
2h C2 883 0.5_1	C315R	24.3678	0.000317052	2	OURT88/3	Attenuated	2	8
2h C2 883 0.5_1	E111R	999	0	2	OURT88/3	Attenuated	2	7
2h C2 883 0.5_1	EP424R	999	0	2	OURT88/3	Attenuated	2	8
2h C2 883 0.5_1	I196L	999	0	2	OURT88/3	Attenuated	2	7
2h C2 883 0.5_1	L60L	21.4461	0.000480879	2	OURT88/3	Attenuated	2	8
2h C2 883 0.5_1	MGF300-2R	22.3587	0.00152289	2	OURT88/3	Attenuated	2	8
2h C2 883 0.5_1	MGF360-16R	18.6515	0.00672502	2	OURT88/3	Attenuated	2	8
2h C2 883 0.5_1	MGF360-9L	999	0	2	OURT88/3	Attenuated	2	8
2h C2 883 0.5_1	S183L	20.6872	0.0140077	2	OURT88/3	Attenuated	2	7
2h C2 883 0.5_1	L83L	999	0	2	OURT88/3	Attenuated	2	8
2h C2 883 0.5_1	B263R	19.9393	6.16373	2	OURT88/3	Attenuated	2	5
2h C2 883 0.5_1	C475L	22.1359	0.00171056	2	OURT88/3	Attenuated	2	8
2h C2 883 0.5_1	E146L	20.5587	0.00893868	2	OURT88/3	Attenuated	2	8
2h C2 883 0.5_1	F165R	999	0	2	OURT88/3	Attenuated	2	7
2h C2 883 0.5_1	I215L	18.9804	0.00441662	2	OURT88/3	Attenuated	2	8
2h C2 883 0.5_1	MGF100-1R	21.4984	0.00293844	2	OURT88/3	Attenuated	2	8
2h C2 883 0.5_1	MGF360-10L	999	0	2	OURT88/3	Attenuated	2	1
2h C2 883 0.5_1	MGF360-1L	999	0	2	OURT88/3	Attenuated	2	8
2h C2 883 0.5_1	MGF505-10R	20.944	0.00371963	2	OURT88/3	Attenuated	2	8
2h C2 883 0.5_1	MGF505-9R	20.327	0.00369753	2	OURT88/3	Attenuated	2	8
2h C2 883 0.5_1	285L	20.0237	0.00630935	2	OURT88/3	Attenuated	2	8
2h C2 883 0.5_1	C962R	18.0313	0.0256582	2	OURT88/3	Attenuated	2	3
2h C2 883 0.5_1	E184L	999	0	2	OURT88/3	Attenuated	2	3
2h C2 883 0.5_1	G-ACD-00600	20.0839	0.00208058	2	OURT88/3	Attenuated	2
2h C2 883 0.5_1	I226R	22.0827	0.00119821	2	OURT88/3	Attenuated	2	3
2h C2 883 0.5_1	MGF100-1L	16.7721	0	2	OURT88/3	Attenuated	2	6
2h C2 883 0.5_1	MGF360-11L	19.0044	0.0375758	2	OURT88/3	Attenuated	2	1
2h C2 883 0.5_1	MGF360-21R	22.205	0.00688593	2	OURT88/3	Attenuated	2	5
2h C2 883 0.5_1	MGF505-11L	22.3937	0.00123656	2	OURT88/3	Attenuated	2	8
2h C2 883 0.5_1	O61R	999	0	2	OURT88/3	Attenuated	2	7
2h C2 883 0.5_1	I267L	26.806	0.000135348	2	OURT88/3	Attenuated	2	3
2h C2 883 0.5_1	E199L	999	0	2	OURT88/3	Attenuated	2	7
2h C2 883 0.5_1	CP312R	999	0	2	OURT88/3	Attenuated	2	8
2h C2 883 0.5_1	B354L	18.869	0.00240947	2	OURT88/3	Attenuated	2	8
2h C2 883 0.5_1	A104R	19.8596	0.000740781	2	OURT88/3	Attenuated	2	7
2h C2 883 0.5_1	CP204L	17.2722	0.00129972	2	OURT88/3	Attenuated	2	8
2h C2 883 0.5_1	MGF505-1R	20.244	0.0148011	2	OURT88/3	Attenuated	2	2
2h C2 883 0.5_1	MGF360-12L	13.7365	1.1009	2	OURT88/3	Attenuated	2	5
2h C2 883 0.5_1	MGF100-3L	20.1934	0.00293254	2	OURT88/3	Attenuated	2	8
2h C2 883 0.5_1	I329L	18.7222	0.0135161	2	OURT88/3	Attenuated	2	8
2h C2 883 0.5_1	H171R	999	0	2	OURT88/3	Attenuated	2	3
2h C2 883 0.5_1	E248R	999	0	2	OURT88/3	Attenuated	2	7
2h C2 883 0.5_1	CP80R	999	0	2	OURT88/3	Attenuated	2	8
2h C2 883 0.5_1	B385R	24.4743	0.000717022	2	OURT88/3	Attenuated	2	7
2h C2 883 0.5_1	A137R	21.2292	0.000499096	2	OURT88/3	Attenuated	2	3
2h C2 883 0.5_1	B646L	23.7189	6.0401e-05	2	OURT88/3	Attenuated	2	7
2h C2 883 0.5_1	MGF505-2R	999	0	2	OURT88/3	Attenuated	2	1
2h C2 883 0.5_1	MGF360-2L	18.0904	0.010154	2	OURT88/3	Attenuated	2	8
2h C2 883 0.5_1	MGF360-13L	999	0	2	OURT88/3	Attenuated	2	2
2h C2 883 0.5_1	MGF110-2L	18.0382	0.0198576	2	OURT88/3	Attenuated	2	8
2h C2 883 0.5_1	I8L	20.4902	0.00458438	2	OURT88/3	Attenuated	2	8
2h C2 883 0.5_1	H233R	999	0	2	OURT88/3	Attenuated	2	3
2h C2 883 0.5_1	E301R	19.304	0.0652581	2	OURT88/3	Attenuated	2	8
2h C2 883 0.5_1	B407L	22.358	0.000504533	2	OURT88/3	Attenuated	2	8
2h C2 883 0.5_1	A151R	999	0	2	OURT88/3	Attenuated	2	8
2h C2 883 0.5_1	MGF505-7R	27.296	4.37973e-05	2	OURT88/3	Attenuated	2	8
2h C2 883 0.5_1	QP383R	999	0	2	OURT88/3	Attenuated	2	3
2h C2 883 0.5_1	MGF505-3R	999	0	2	OURT88/3	Attenuated	2
2h C2 883 0.5_1	MGF360-3L	21.8106	0.000735555	2	OURT88/3	Attenuated	2	8
2h C2 883 0.5_1	K205R	22.7696	0.000171369	2	OURT88/3	Attenuated	2	8
2h C2 883 0.5_1	H240R	999	0	2	OURT88/3	Attenuated	2	3
2h C2 883 0.5_1	DP238L	22.3062	0.000406576	2	OURT88/3	Attenuated	2	8
2h C2 883 0.5_1	B475L	999	0	2	OURT88/3	Attenuated	2	8
2h C2 883 0.5_1	A224L	17.6337	0.00550566	2	OURT88/3	Attenuated	2	8
2h C2 883 0.5_1	R298L	21.636	0.00404107	2	OURT88/3	Attenuated	2	3
2h C2 883 0.5_1	MGF505-4R	999	0	2	OURT88/3	Attenuated	2	8
2h C2 883 0.5_1	MGF360-4L	999	0	2	OURT88/3	Attenuated	2	8
2h C2 883 0.5_1	MGF360-14L	999	0	2	OURT88/3	Attenuated	2	2
2h C2 883 0.5_1	MGF110-4L	13.8734	0.0407494	2	OURT88/3	Attenuated	2	8
24h C1 NHP 0.5_1	A238L	13.3671	1.92777	24	NH/P68	Attenuated	1	8
24h C1 NHP 0.5_1	B119L	9.69817	5.41398	24	NH/P68	Attenuated	1	7
24h C1 NHP 0.5_1	C129R	9.91565	3.5342	24	NH/P68	Attenuated	1	8
24h C1 NHP 0.5_1	DP96R	10.1888	1.96873	24	NH/P68	Attenuated	1	8
24h C1 NHP 0.5_1	EP364R	12.0501	3.13019	24	NH/P68	Attenuated	1	8
24h C1 NHP 0.5_1	H359L	12.7134	2.59715	24	NH/P68	Attenuated	1	8
24h C1 NHP 0.5_1	K78R	7.32127	4.0575	24	NH/P68	Attenuated	1	7
24h C1 NHP 0.5_1	MGF110-7L	999	0	24	NH/P68	Attenuated	1	4
24h C1 NHP 0.5_1	MGF360-15R	10.1247	2.01905	24	NH/P68	Attenuated	1	8
24h C1 NHP 0.5_1	MGF360-8L	13.325	2.18772	24	NH/P68	Attenuated	1	8
24h C1 NHP 0.5_1	MGF505-5R	13.78	1.59649	24	NH/P68	Attenuated	1	8
24h C1 NHP 0.5_1	A179L	10.908	1.88558	24	NH/P68	Attenuated	1	8
24h C1 NHP 0.5_1	B125R	11.6815	3.11785	24	NH/P68	Attenuated	1	7
24h C1 NHP 0.5_1	C315R	12.4112	2.5607	24	NH/P68	Attenuated	1	8
24h C1 NHP 0.5_1	E111R	9.70554	3.32873	24	NH/P68	Attenuated	1	7
24h C1 NHP 0.5_1	EP424R	10.7227	2.93019	24	NH/P68	Attenuated	1	8
24h C1 NHP 0.5_1	I196L	11.1815	2.73031	24	NH/P68	Attenuated	1	7
24h C1 NHP 0.5_1	L60L	9.79606	3.14013	24	NH/P68	Attenuated	1	8
24h C1 NHP 0.5_1	MGF300-2R	13.3504	1.59347	24	NH/P68	Attenuated	1	8
24h C1 NHP 0.5_1	MGF360-16R	11.7415	1.64341	24	NH/P68	Attenuated	1	8
24h C1 NHP 0.5_1	MGF360-9L	13.2463	1.70107	24	NH/P68	Attenuated	1	8
24h C1 NHP 0.5_1	S183L	13.6284	3.795	24	NH/P68	Attenuated	1	7
24h C1 NHP 0.5_1	L83L	9.59676	2.90832	24	NH/P68	Attenuated	1	8
24h C1 NHP 0.5_1	B263R	21.7253	3.63184	24	NH/P68	Attenuated	1	5
24h C1 NHP 0.5_1	C475L	12.1565	3.50881	24	NH/P68	Attenuated	1	8
24h C1 NHP 0.5_1	E146L	13.419	2.56136	24	NH/P68	Attenuated	1	8
24h C1 NHP 0.5_1	F165R	10.8363	3.81281	24	NH/P68	Attenuated	1	7
24h C1 NHP 0.5_1	I215L	11.6423	1.45211	24	NH/P68	Attenuated	1	8
24h C1 NHP 0.5_1	MGF100-1R	12.6129	2.82396	24	NH/P68	Attenuated	1	8
24h C1 NHP 0.5_1	MGF360-10L	29.22	3.36835e-05	24	NH/P68	Attenuated	1	1
24h C1 NHP 0.5_1	MGF360-1L	14.6121	1.18324	24	NH/P68	Attenuated	1	8
24h C1 NHP 0.5_1	MGF505-10R	12.568	2.51096	24	NH/P68	Attenuated	1	8
24h C1 NHP 0.5_1	MGF505-9R	12.5301	1.67085	24	NH/P68	Attenuated	1	8
24h C1 NHP 0.5_1	285L	14.0054	0.830977	24	NH/P68	Attenuated	1	8
24h C1 NHP 0.5_1	C962R	11.9034	3.64622	24	NH/P68	Attenuated	1	3
24h C1 NHP 0.5_1	E184L	9.35955	2.9193	24	NH/P68	Attenuated	1	3
24h C1 NHP 0.5_1	G-ACD-00600	15.1341	0.130658	24	NH/P68	Attenuated	1
24h C1 NHP 0.5_1	I226R	11.6626	3.33596	24	NH/P68	Attenuated	1	3
24h C1 NHP 0.5_1	MGF100-1L	10.3684	0	24	NH/P68	Attenuated	1	6
24h C1 NHP 0.5_1	MGF360-11L	24.1793	0.00211371	24	NH/P68	Attenuated	1	1
24h C1 NHP 0.5_1	MGF360-21R	999	0	24	NH/P68	Attenuated	1	5
24h C1 NHP 0.5_1	MGF505-11L	12.9562	1.74222	24	NH/P68	Attenuated	1	8
24h C1 NHP 0.5_1	O61R	8.38067	3.75134	24	NH/P68	Attenuated	1	7
24h C1 NHP 0.5_1	I267L	14.1494	1.77579	24	NH/P68	Attenuated	1	3
24h C1 NHP 0.5_1	E199L	15.3685	2.41852	24	NH/P68	Attenuated	1	7
24h C1 NHP 0.5_1	CP312R	10.0632	0.888104	24	NH/P68	Attenuated	1	8
24h C1 NHP 0.5_1	B354L	9.37598	3.52801	24	NH/P68	Attenuated	1	8
24h C1 NHP 0.5_1	A104R	8.57937	3.74364	24	NH/P68	Attenuated	1	7
24h C1 NHP 0.5_1	CP204L	9.07636	0.774374	24	NH/P68	Attenuated	1	8
24h C1 NHP 0.5_1	MGF505-1R	999	0	24	NH/P68	Attenuated	1	2
24h C1 NHP 0.5_1	MGF360-12L	18.1598	0.10426	24	NH/P68	Attenuated	1	5
24h C1 NHP 0.5_1	MGF100-3L	12.2614	1.45521	24	NH/P68	Attenuated	1	8
24h C1 NHP 0.5_1	I329L	12.0546	2.79198	24	NH/P68	Attenuated	1	8
24h C1 NHP 0.5_1	H171R	12.183	3.63634	24	NH/P68	Attenuated	1	3
24h C1 NHP 0.5_1	E248R	13.9862	2.38386	24	NH/P68	Attenuated	1	7
24h C1 NHP 0.5_1	CP80R	11.3585	3.00809	24	NH/P68	Attenuated	1	8
24h C1 NHP 0.5_1	B385R	13.1116	3.83678	24	NH/P68	Attenuated	1	7
24h C1 NHP 0.5_1	A137R	9.87871	2.64805	24	NH/P68	Attenuated	1	3
24h C1 NHP 0.5_1	B646L	8.56884	4.46248	24	NH/P68	Attenuated	1	7
24h C1 NHP 0.5_1	MGF505-2R	999	0	24	NH/P68	Attenuated	1	1
24h C1 NHP 0.5_1	MGF360-2L	10.7549	3.33253	24	NH/P68	Attenuated	1	8
24h C1 NHP 0.5_1	MGF360-13L	999	0	24	NH/P68	Attenuated	1	2
24h C1 NHP 0.5_1	MGF110-2L	13.1587	1.18767	24	NH/P68	Attenuated	1	8
24h C1 NHP 0.5_1	I8L	13.227	1.43096	24	NH/P68	Attenuated	1	8
24h C1 NHP 0.5_1	H233R	10.1409	3.5803	24	NH/P68	Attenuated	1	3
24h C1 NHP 0.5_1	E301R	14.3167	4.20616	24	NH/P68	Attenuated	1	8
24h C1 NHP 0.5_1	B407L	10.5901	3.57524	24	NH/P68	Attenuated	1	8
24h C1 NHP 0.5_1	A151R	9.1957	1.97959	24	NH/P68	Attenuated	1	8
24h C1 NHP 0.5_1	MGF505-7R	13.681	1.11654	24	NH/P68	Attenuated	1	8
24h C1 NHP 0.5_1	QP383R	15.0547	3.60742	24	NH/P68	Attenuated	1	3
24h C1 NHP 0.5_1	MGF505-3R	29.3895	5.02833e-05	24	NH/P68	Attenuated	1
24h C1 NHP 0.5_1	MGF360-3L	11.0541	2.5856	24	NH/P68	Attenuated	1	8
24h C1 NHP 0.5_1	K205R	10.3995	1.8435	24	NH/P68	Attenuated	1	8
24h C1 NHP 0.5_1	H240R	10.0726	3.93056	24	NH/P68	Attenuated	1	3
24h C1 NHP 0.5_1	DP238L	11.8038	1.19834	24	NH/P68	Attenuated	1	8
24h C1 NHP 0.5_1	B475L	10.2338	4.04236	24	NH/P68	Attenuated	1	8
24h C1 NHP 0.5_1	A224L	10.0578	2.13454	24	NH/P68	Attenuated	1	8
24h C1 NHP 0.5_1	R298L	12.7756	3.81646	24	NH/P68	Attenuated	1	3
24h C1 NHP 0.5_1	MGF505-4R	13.7353	2.23977	24	NH/P68	Attenuated	1	8
24h C1 NHP 0.5_1	MGF360-4L	13.4997	2.08809	24	NH/P68	Attenuated	1	8
24h C1 NHP 0.5_1	MGF360-14L	999	0	24	NH/P68	Attenuated	1	2
24h C1 NHP 0.5_1	MGF110-4L	9.30541	1.96396	24	NH/P68	Attenuated	1	8
2h C3 L60 1.5_1	A238L	18.0315	0.0758001	2	L60	Virulent	3	8
2h C3 L60 1.5_1	B119L	21.3844	0.00163806	2	L60	Virulent	3	7
2h C3 L60 1.5_1	C129R	999	0	2	L60	Virulent	3	8
2h C3 L60 1.5_1	DP96R	15.8529	0.038714	2	L60	Virulent	3	8
2h C3 L60 1.5_1	EP364R	999	0	2	L60	Virulent	3	8
2h C3 L60 1.5_1	H359L	19.4255	0.0247003	2	L60	Virulent	3	8
2h C3 L60 1.5_1	K78R	20.5337	0.000426228	2	L60	Virulent	3	7
2h C3 L60 1.5_1	MGF110-7L	24.6368	0.000221705	2	L60	Virulent	3	4
2h C3 L60 1.5_1	MGF360-15R	15.6838	0.0427012	2	L60	Virulent	3	8
2h C3 L60 1.5_1	MGF360-8L	23.1034	0.00248381	2	L60	Virulent	3	8
2h C3 L60 1.5_1	MGF505-5R	22.6617	0.00337473	2	L60	Virulent	3	8
2h C3 L60 1.5_1	A179L	18.3413	0.0108779	2	L60	Virulent	3	8
2h C3 L60 1.5_1	B125R	999	0	2	L60	Virulent	3	7
2h C3 L60 1.5_1	C315R	23.2962	0.0013501	2	L60	Virulent	3	8
2h C3 L60 1.5_1	E111R	999	0	2	L60	Virulent	3	7
2h C3 L60 1.5_1	EP424R	999	0	2	L60	Virulent	3	8
2h C3 L60 1.5_1	I196L	24.6683	0.000237155	2	L60	Virulent	3	7
2h C3 L60 1.5_1	L60L	23.4571	0.000241713	2	L60	Virulent	3	8
2h C3 L60 1.5_1	MGF300-2R	20.2523	0.0132857	2	L60	Virulent	3	8
2h C3 L60 1.5_1	MGF360-16R	18.5869	0.0142495	2	L60	Virulent	3	8
2h C3 L60 1.5_1	MGF360-9L	999	0	2	L60	Virulent	3	8
2h C3 L60 1.5_1	S183L	19.7538	0.0541993	2	L60	Virulent	3	7
2h C3 L60 1.5_1	L83L	20.9386	0.00111718	2	L60	Virulent	3	8
2h C3 L60 1.5_1	B263R	19.4652	17.3456	2	L60	Virulent	3	5
2h C3 L60 1.5_1	C475L	21.7602	0.0044965	2	L60	Virulent	3	8
2h C3 L60 1.5_1	E146L	19.8639	0.0293152	2	L60	Virulent	3	8
2h C3 L60 1.5_1	F165R	23.3017	0.000672234	2	L60	Virulent	3	7
2h C3 L60 1.5_1	I215L	26.0281	6.7636e-05	2	L60	Virulent	3	8
2h C3 L60 1.5_1	MGF100-1R	999	0	2	L60	Virulent	3	8
2h C3 L60 1.5_1	MGF360-10L	25.6099	0.000410117	2	L60	Virulent	3	1
2h C3 L60 1.5_1	MGF360-1L	999	0	2	L60	Virulent	3	8
2h C3 L60 1.5_1	MGF505-10R	999	0	2	L60	Virulent	3	8
2h C3 L60 1.5_1	MGF505-9R	20.3916	0.00716314	2	L60	Virulent	3	8
2h C3 L60 1.5_1	285L	19.851	0.0144085	2	L60	Virulent	3	8
2h C3 L60 1.5_1	C962R	17.4443	0.0780883	2	L60	Virulent	3	3
2h C3 L60 1.5_1	E184L	999	0	2	L60	Virulent	3	3
2h C3 L60 1.5_1	G-ACD-00600	19.3784	0.00687386	2	L60	Virulent	3
2h C3 L60 1.5_1	I226R	20.3239	0.00821552	2	L60	Virulent	3	3
2h C3 L60 1.5_1	MGF100-1L	17.1335	0	2	L60	Virulent	3	6
2h C3 L60 1.5_1	MGF360-11L	18.2201	0.131117	2	L60	Virulent	3	1
2h C3 L60 1.5_1	MGF360-21R	22.3305	0.0127881	2	L60	Virulent	3	5
2h C3 L60 1.5_1	MGF505-11L	22.8869	0.00177988	2	L60	Virulent	3	8
2h C3 L60 1.5_1	O61R	24.0574	7.14098e-05	2	L60	Virulent	3	7
2h C3 L60 1.5_1	I267L	999	0	2	L60	Virulent	3	3
2h C3 L60 1.5_1	E199L	999	0	2	L60	Virulent	3	7
2h C3 L60 1.5_1	CP312R	22.4367	0.00016688	2	L60	Virulent	3	8
2h C3 L60 1.5_1	B354L	18.6588	0.00564732	2	L60	Virulent	3	8
2h C3 L60 1.5_1	A104R	18.5728	0.00366175	2	L60	Virulent	3	7
2h C3 L60 1.5_1	CP204L	16.8153	0.00361423	2	L60	Virulent	3	8
2h C3 L60 1.5_1	MGF505-1R	19.1284	0.064979	2	L60	Virulent	3	2
2h C3 L60 1.5_1	MGF360-12L	12.4899	5.29237	2	L60	Virulent	3	5
2h C3 L60 1.5_1	MGF100-3L	20.6939	0.00419962	2	L60	Virulent	3	8
2h C3 L60 1.5_1	I329L	18.5717	0.0303947	2	L60	Virulent	3	8
2h C3 L60 1.5_1	H171R	24.1622	0.000898062	2	L60	Virulent	3	3
2h C3 L60 1.5_1	E248R	20.9867	0.018564	2	L60	Virulent	3	7
2h C3 L60 1.5_1	CP80R	21.3376	0.00297171	2	L60	Virulent	3	8
2h C3 L60 1.5_1	B385R	999	0	2	L60	Virulent	3	7
2h C3 L60 1.5_1	A137R	23.3259	0.000236404	2	L60	Virulent	3	3
2h C3 L60 1.5_1	B646L	24.7432	6.01627e-05	2	L60	Virulent	3	7
2h C3 L60 1.5_1	MGF505-2R	999	0	2	L60	Virulent	3	1
2h C3 L60 1.5_1	MGF360-2L	17.2396	0.0371037	2	L60	Virulent	3	8
2h C3 L60 1.5_1	MGF360-13L	999	0	2	L60	Virulent	3	2
2h C3 L60 1.5_1	MGF110-2L	19.6641	0.0130351	2	L60	Virulent	3	8
2h C3 L60 1.5_1	I8L	19.8148	0.0148328	2	L60	Virulent	3	8
2h C3 L60 1.5_1	H233R	999	0	2	L60	Virulent	3	3
2h C3 L60 1.5_1	E301R	18.2831	0.268289	2	L60	Virulent	3	8
2h C3 L60 1.5_1	B407L	22.6488	0.0008356	2	L60	Virulent	3	8
2h C3 L60 1.5_1	A151R	23.7701	8.09046e-05	2	L60	Virulent	3	8
2h C3 L60 1.5_1	MGF505-7R	23.3195	0.00139681	2	L60	Virulent	3	8
2h C3 L60 1.5_1	QP383R	999	0	2	L60	Virulent	3	3
2h C3 L60 1.5_1	MGF505-3R	16.1472	0.485825	2	L60	Virulent	3
2h C3 L60 1.5_1	MGF360-3L	19.445	0.00768024	2	L60	Virulent	3	8
2h C3 L60 1.5_1	K205R	24.8552	8.17986e-05	2	L60	Virulent	3	8
2h C3 L60 1.5_1	H240R	999	0	2	L60	Virulent	3	3
2h C3 L60 1.5_1	DP238L	19.5222	0.00567339	2	L60	Virulent	3	8
2h C3 L60 1.5_1	B475L	21.5628	0.00156673	2	L60	Virulent	3	8
2h C3 L60 1.5_1	A224L	18.804	0.00495657	2	L60	Virulent	3	8
2h C3 L60 1.5_1	R298L	22.2347	0.00540656	2	L60	Virulent	3	3
2h C3 L60 1.5_1	MGF505-4R	20.9299	0.0152455	2	L60	Virulent	3	8
2h C3 L60 1.5_1	MGF360-4L	999	0	2	L60	Virulent	3	8
2h C3 L60 1.5_1	MGF360-14L	999	0	2	L60	Virulent	3	2
2h C3 L60 1.5_1	MGF110-4L	999	0	2	L60	Virulent	3	8
8h C3 NHP 1.5_1	A238L	14.5415	0.499334	8	NH/P68	Attenuated	3	8
8h C3 NHP 1.5_1	B119L	13.8655	0.176144	8	NH/P68	Attenuated	3	7
8h C3 NHP 1.5_1	C129R	12.0611	0.466991	8	NH/P68	Attenuated	3	8
8h C3 NHP 1.5_1	DP96R	13.4771	0.11781	8	NH/P68	Attenuated	3	8
8h C3 NHP 1.5_1	EP364R	15.4877	0.168895	8	NH/P68	Attenuated	3	8
8h C3 NHP 1.5_1	H359L	13.6436	0.796794	8	NH/P68	Attenuated	3	8
8h C3 NHP 1.5_1	K78R	12.4866	0.0660974	8	NH/P68	Attenuated	3	7
8h C3 NHP 1.5_1	MGF110-7L	999	0	8	NH/P68	Attenuated	3	4
8h C3 NHP 1.5_1	MGF360-15R	13.4356	0.118936	8	NH/P68	Attenuated	3	8
8h C3 NHP 1.5_1	MGF360-8L	15.5671	0.270331	8	NH/P68	Attenuated	3	8
8h C3 NHP 1.5_1	MGF505-5R	15.6951	0.247467	8	NH/P68	Attenuated	3	8
8h C3 NHP 1.5_1	A179L	12.7303	0.311706	8	NH/P68	Attenuated	3	8
8h C3 NHP 1.5_1	B125R	15.69	0.113248	8	NH/P68	Attenuated	3	7
8h C3 NHP 1.5_1	C315R	13.9093	0.529933	8	NH/P68	Attenuated	3	8
8h C3 NHP 1.5_1	E111R	11.8881	0.428651	8	NH/P68	Attenuated	3	7
8h C3 NHP 1.5_1	EP424R	14.0019	0.17645	8	NH/P68	Attenuated	3	8
8h C3 NHP 1.5_1	I196L	15.1846	0.099548	8	NH/P68	Attenuated	3	7
8h C3 NHP 1.5_1	L60L	14.5573	0.0676912	8	NH/P68	Attenuated	3	8
8h C3 NHP 1.5_1	MGF300-2R	14.9857	0.299868	8	NH/P68	Attenuated	3	8
8h C3 NHP 1.5_1	MGF360-16R	13.3826	0.308011	8	NH/P68	Attenuated	3	8
8h C3 NHP 1.5_1	MGF360-9L	15.3923	0.224684	8	NH/P68	Attenuated	3	8
8h C3 NHP 1.5_1	S183L	18.5845	0.0714689	8	NH/P68	Attenuated	3	7
8h C3 NHP 1.5_1	L83L	13.9316	0.0842513	8	NH/P68	Attenuated	3	8
8h C3 NHP 1.5_1	B263R	20.9134	3.72721	8	NH/P68	Attenuated	3	5
8h C3 NHP 1.5_1	C475L	15.6627	0.180531	8	NH/P68	Attenuated	3	8
8h C3 NHP 1.5_1	E146L	16.0906	0.23501	8	NH/P68	Attenuated	3	8
8h C3 NHP 1.5_1	F165R	14.3975	0.188822	8	NH/P68	Attenuated	3	7
8h C3 NHP 1.5_1	I215L	13.4834	0.236927	8	NH/P68	Attenuated	3	8
8h C3 NHP 1.5_1	MGF100-1R	14.9996	0.315664	8	NH/P68	Attenuated	3	8
8h C3 NHP 1.5_1	MGF360-10L	26.4695	0.00013251	8	NH/P68	Attenuated	3	1
8h C3 NHP 1.5_1	MGF360-1L	16.4717	0.190606	8	NH/P68	Attenuated	3	8
8h C3 NHP 1.5_1	MGF505-10R	14.8131	0.309627	8	NH/P68	Attenuated	3	8
8h C3 NHP 1.5_1	MGF505-9R	14.5472	0.241303	8	NH/P68	Attenuated	3	8
8h C3 NHP 1.5_1	285L	15.4305	0.180907	8	NH/P68	Attenuated	3	8
8h C3 NHP 1.5_1	C962R	13.3274	0.794342	8	NH/P68	Attenuated	3	3
8h C3 NHP 1.5_1	E184L	10.5745	0.735193	8	NH/P68	Attenuated	3	3
8h C3 NHP 1.5_1	G-ACD-00600	16.7208	0.0254296	8	NH/P68	Attenuated	3
8h C3 NHP 1.5_1	I226R	12.9341	0.807844	8	NH/P68	Attenuated	3	3
8h C3 NHP 1.5_1	MGF100-1L	11.0928	0	8	NH/P68	Attenuated	3	6
8h C3 NHP 1.5_1	MGF360-11L	21.2663	0.0093066	8	NH/P68	Attenuated	3	1
8h C3 NHP 1.5_1	MGF360-21R	999	0	8	NH/P68	Attenuated	3	5
8h C3 NHP 1.5_1	MGF505-11L	14.4232	0.36841	8	NH/P68	Attenuated	3	8
8h C3 NHP 1.5_1	O61R	13.728	0.0538661	8	NH/P68	Attenuated	3	7
8h C3 NHP 1.5_1	I267L	14.1523	1.03605	8	NH/P68	Attenuated	3	3
8h C3 NHP 1.5_1	E199L	18.9072	0.121655	8	NH/P68	Attenuated	3	7
8h C3 NHP 1.5_1	CP312R	10.961	0.278645	8	NH/P68	Attenuated	3	8
8h C3 NHP 1.5_1	B354L	11.9566	0.344775	8	NH/P68	Attenuated	3	8
8h C3 NHP 1.5_1	A104R	12.6667	0.128742	8	NH/P68	Attenuated	3	7
8h C3 NHP 1.5_1	CP204L	10.4302	0.17711	8	NH/P68	Attenuated	3	8
8h C3 NHP 1.5_1	MGF505-1R	22.3992	0.00394733	8	NH/P68	Attenuated	3	2
8h C3 NHP 1.5_1	MGF360-12L	14.5959	0.720783	8	NH/P68	Attenuated	3	5
8h C3 NHP 1.5_1	MGF100-3L	13.722	0.309096	8	NH/P68	Attenuated	3	8
8h C3 NHP 1.5_1	I329L	14.9864	0.213894	8	NH/P68	Attenuated	3	8
8h C3 NHP 1.5_1	H171R	14.2037	0.523877	8	NH/P68	Attenuated	3	3
8h C3 NHP 1.5_1	E248R	17.9466	0.0895247	8	NH/P68	Attenuated	3	7
8h C3 NHP 1.5_1	CP80R	14.0108	0.279728	8	NH/P68	Attenuated	3	8
8h C3 NHP 1.5_1	B385R	17.0122	0.150188	8	NH/P68	Attenuated	3	7
8h C3 NHP 1.5_1	A137R	10.5331	0.983518	8	NH/P68	Attenuated	3	3
8h C3 NHP 1.5_1	B646L	14.5584	0.0410576	8	NH/P68	Attenuated	3	7
8h C3 NHP 1.5_1	MGF505-2R	999	0	8	NH/P68	Attenuated	3	1
8h C3 NHP 1.5_1	MGF360-2L	14.4372	0.151753	8	NH/P68	Attenuated	3	8
8h C3 NHP 1.5_1	MGF360-13L	23.21	0.00568402	8	NH/P68	Attenuated	3	2
8h C3 NHP 1.5_1	MGF110-2L	15.1728	0.171886	8	NH/P68	Attenuated	3	8
8h C3 NHP 1.5_1	I8L	14.0822	0.462426	8	NH/P68	Attenuated	3	8
8h C3 NHP 1.5_1	H233R	11.9019	0.617516	8	NH/P68	Attenuated	3	3
8h C3 NHP 1.5_1	E301R	16.1477	0.691098	8	NH/P68	Attenuated	3	8
8h C3 NHP 1.5_1	B407L	12.6609	0.49748	8	NH/P68	Attenuated	3	8
8h C3 NHP 1.5_1	A151R	10.8452	0.368879	8	NH/P68	Attenuated	3	8
8h C3 NHP 1.5_1	MGF505-7R	15.4722	0.188593	8	NH/P68	Attenuated	3	8
8h C3 NHP 1.5_1	QP383R	15.7337	1.3171	8	NH/P68	Attenuated	3	3
8h C3 NHP 1.5_1	MGF505-3R	999	0	8	NH/P68	Attenuated	3
8h C3 NHP 1.5_1	MGF360-3L	13.9792	0.199005	8	NH/P68	Attenuated	3	8
8h C3 NHP 1.5_1	K205R	10.7694	0.83393	8	NH/P68	Attenuated	3	8
8h C3 NHP 1.5_1	H240R	11.8948	0.649795	8	NH/P68	Attenuated	3	3
8h C3 NHP 1.5_1	DP238L	12.5464	0.418698	8	NH/P68	Attenuated	3	8
8h C3 NHP 1.5_1	B475L	12.6926	0.429828	8	NH/P68	Attenuated	3	8
8h C3 NHP 1.5_1	A224L	12.2222	0.278358	8	NH/P68	Attenuated	3	8
8h C3 NHP 1.5_1	R298L	13.9652	0.978152	8	NH/P68	Attenuated	3	3
8h C3 NHP 1.5_1	MGF505-4R	16.805	0.15595	8	NH/P68	Attenuated	3	8
8h C3 NHP 1.5_1	MGF360-4L	16.579	0.144428	8	NH/P68	Attenuated	3	8
8h C3 NHP 1.5_1	MGF360-14L	999	0	8	NH/P68	Attenuated	3	2
8h C3 NHP 1.5_1	MGF110-4L	10.6175	0.462376	8	NH/P68	Attenuated	3	8
48h C2 883 0.5_1	A238L	11.3153	56.3332	48	OURT88/3	Attenuated	2	8
48h C2 883 0.5_1	B119L	9.63055	39.9871	48	OURT88/3	Attenuated	2	7
48h C2 883 0.5_1	C129R	9.59417	31.125	48	OURT88/3	Attenuated	2	8
48h C2 883 0.5_1	DP96R	8.78374	36.7455	48	OURT88/3	Attenuated	2	8
48h C2 883 0.5_1	EP364R	11.3167	36.6776	48	OURT88/3	Attenuated	2	8
48h C2 883 0.5_1	H359L	11.6705	37.7143	48	OURT88/3	Attenuated	2	8
48h C2 883 0.5_1	K78R	7.74978	21.2475	48	OURT88/3	Attenuated	2	7
48h C2 883 0.5_1	MGF110-7L	999	0	48	OURT88/3	Attenuated	2	4
48h C2 883 0.5_1	MGF360-15R	8.7404	37.1462	48	OURT88/3	Attenuated	2	8
48h C2 883 0.5_1	MGF360-8L	11.4019	58.4736	48	OURT88/3	Attenuated	2	8
48h C2 883 0.5_1	MGF505-5R	11.572	51.9867	48	OURT88/3	Attenuated	2	8
48h C2 883 0.5_1	A179L	9.08045	47.1674	48	OURT88/3	Attenuated	2	8
48h C2 883 0.5_1	B125R	11.0859	33.204	48	OURT88/3	Attenuated	2	7
48h C2 883 0.5_1	C315R	11.1752	42.5069	48	OURT88/3	Attenuated	2	8
48h C2 883 0.5_1	E111R	9.86876	20.9503	48	OURT88/3	Attenuated	2	7
48h C2 883 0.5_1	EP424R	9.87052	37.2794	48	OURT88/3	Attenuated	2	8
48h C2 883 0.5_1	I196L	10.4032	33.0034	48	OURT88/3	Attenuated	2	7
48h C2 883 0.5_1	L60L	8.91414	40.783	48	OURT88/3	Attenuated	2	8
48h C2 883 0.5_1	MGF300-2R	11.1159	52.8503	48	OURT88/3	Attenuated	2	8
48h C2 883 0.5_1	MGF360-16R	9.68169	48.2892	48	OURT88/3	Attenuated	2	8
48h C2 883 0.5_1	MGF360-9L	12.1754	25.1849	48	OURT88/3	Attenuated	2	8
48h C2 883 0.5_1	S183L	13.3395	32.6745	48	OURT88/3	Attenuated	2	7
48h C2 883 0.5_1	L83L	8.32012	49.6586	48	OURT88/3	Attenuated	2	8
48h C2 883 0.5_1	B263R	22.3156	17.0002	48	OURT88/3	Attenuated	2	5
48h C2 883 0.5_1	C475L	11.4376	40.7032	48	OURT88/3	Attenuated	2	8
48h C2 883 0.5_1	E146L	13.2071	20.9067	48	OURT88/3	Attenuated	2	8
48h C2 883 0.5_1	F165R	10.9355	25.0851	48	OURT88/3	Attenuated	2	7
48h C2 883 0.5_1	I215L	9.52903	44.279	48	OURT88/3	Attenuated	2	8
48h C2 883 0.5_1	MGF100-1R	10.9496	63.0362	48	OURT88/3	Attenuated	2	8
48h C2 883 0.5_1	MGF360-10L	23.2681	0.0146955	48	OURT88/3	Attenuated	2	1
48h C2 883 0.5_1	MGF360-1L	12.1839	44.8848	48	OURT88/3	Attenuated	2	8
48h C2 883 0.5_1	MGF505-10R	10.8072	59.9717	48	OURT88/3	Attenuated	2	8
48h C2 883 0.5_1	MGF505-9R	10.5953	45.0219	48	OURT88/3	Attenuated	2	8
48h C2 883 0.5_1	285L	11.1025	43.801	48	OURT88/3	Attenuated	2	8
48h C2 883 0.5_1	C962R	11.6744	30.118	48	OURT88/3	Attenuated	2	3
48h C2 883 0.5_1	E184L	9.70966	16.141	48	OURT88/3	Attenuated	2	3
48h C2 883 0.5_1	G-ACD-00600	12.8846	4.37875	48	OURT88/3	Attenuated	2
48h C2 883 0.5_1	I226R	11.8498	20.6501	48	OURT88/3	Attenuated	2	3
48h C2 883 0.5_1	MGF100-1L	7.53971	0	48	OURT88/3	Attenuated	2	6
48h C2 883 0.5_1	MGF360-11L	25.1026	0.00785475	48	OURT88/3	Attenuated	2	1
48h C2 883 0.5_1	MGF360-21R	999	0	48	OURT88/3	Attenuated	2	5
48h C2 883 0.5_1	MGF505-11L	11.0238	46.865	48	OURT88/3	Attenuated	2	8
48h C2 883 0.5_1	O61R	8.072	32.7453	48	OURT88/3	Attenuated	2	7
48h C2 883 0.5_1	I267L	12.8062	31.7522	48	OURT88/3	Attenuated	2	3
48h C2 883 0.5_1	E199L	14.7891	25.4688	48	OURT88/3	Attenuated	2	7
48h C2 883 0.5_1	CP312R	6.5883	69.5937	48	OURT88/3	Attenuated	2	8
48h C2 883 0.5_1	B354L	9.35336	25.2573	48	OURT88/3	Attenuated	2	8
48h C2 883 0.5_1	A104R	8.07725	37.3674	48	OURT88/3	Attenuated	2	7
48h C2 883 0.5_1	CP204L	5.60016	60.7347	48	OURT88/3	Attenuated	2	8
48h C2 883 0.5_1	MGF505-1R	999	0	48	OURT88/3	Attenuated	2	2
48h C2 883 0.5_1	MGF360-12L	18.0316	0.80306	48	OURT88/3	Attenuated	2	5
48h C2 883 0.5_1	MGF100-3L	9.26678	81.7419	48	OURT88/3	Attenuated	2	8
48h C2 883 0.5_1	I329L	10.904	43.6855	48	OURT88/3	Attenuated	2	8
48h C2 883 0.5_1	H171R	12.4975	20.6086	48	OURT88/3	Attenuated	2	3
48h C2 883 0.5_1	E248R	13.4749	23.9468	48	OURT88/3	Attenuated	2	7
48h C2 883 0.5_1	CP80R	10.676	34.0262	48	OURT88/3	Attenuated	2	8
48h C2 883 0.5_1	B385R	12.6885	36.257	48	OURT88/3	Attenuated	2	7
48h C2 883 0.5_1	A137R	10.7231	10.3938	48	OURT88/3	Attenuated	2	3
48h C2 883 0.5_1	B646L	8.67078	29.3044	48	OURT88/3	Attenuated	2	7
48h C2 883 0.5_1	MGF505-2R	999	0	48	OURT88/3	Attenuated	2	1
48h C2 883 0.5_1	MGF360-2L	9.73177	47.7315	48	OURT88/3	Attenuated	2	8
48h C2 883 0.5_1	MGF360-13L	999	0	48	OURT88/3	Attenuated	2	2
48h C2 883 0.5_1	MGF110-2L	10.4884	53.2825	48	OURT88/3	Attenuated	2	8
48h C2 883 0.5_1	I8L	10.8535	52.2603	48	OURT88/3	Attenuated	2	8
48h C2 883 0.5_1	H233R	10.6688	17.5	48	OURT88/3	Attenuated	2	3
48h C2 883 0.5_1	E301R	14.1049	34.3314	48	OURT88/3	Attenuated	2	8
48h C2 883 0.5_1	B407L	10.4994	26.8304	48	OURT88/3	Attenuated	2	8
48h C2 883 0.5_1	A151R	7.70202	39.2882	48	OURT88/3	Attenuated	2	8
48h C2 883 0.5_1	MGF505-7R	10.4788	72.4249	48	OURT88/3	Attenuated	2	8
48h C2 883 0.5_1	QP383R	14.7317	31.803	48	OURT88/3	Attenuated	2	3
48h C2 883 0.5_1	MGF505-3R	23.3753	0.022905	48	OURT88/3	Attenuated	2
48h C2 883 0.5_1	MGF360-3L	9.99414	37.9901	48	OURT88/3	Attenuated	2	8
48h C2 883 0.5_1	K205R	8.62164	44.5518	48	OURT88/3	Attenuated	2	8
48h C2 883 0.5_1	H240R	10.3388	23.0339	48	OURT88/3	Attenuated	2	3
48h C2 883 0.5_1	DP238L	9.04294	57.2442	48	OURT88/3	Attenuated	2	8
48h C2 883 0.5_1	B475L	10.0286	32.8423	48	OURT88/3	Attenuated	2	8
48h C2 883 0.5_1	A224L	8.36175	48.7435	48	OURT88/3	Attenuated	2	8
48h C2 883 0.5_1	R298L	12.7936	26.5639	48	OURT88/3	Attenuated	2	3
48h C2 883 0.5_1	MGF505-4R	12.4697	37.9498	48	OURT88/3	Attenuated	2	8
48h C2 883 0.5_1	MGF360-4L	12.2953	33.9113	48	OURT88/3	Attenuated	2	8
48h C2 883 0.5_1	MGF360-14L	999	0	48	OURT88/3	Attenuated	2	2
48h C2 883 0.5_1	MGF110-4L	7.87566	37.2885	48	OURT88/3	Attenuated	2	8
8h C2 Geo 0.5_1	A238L	16.2181	0.166448	8	Georgia 2007/1	Virulent	2	8
8h C2 Geo 0.5_1	B119L	15.0309	0.0836864	8	Georgia 2007/1	Virulent	2	7
8h C2 Geo 0.5_1	C129R	12.4607	0.377225	8	Georgia 2007/1	Virulent	2	8
8h C2 Geo 0.5_1	DP96R	12.6544	0.22204	8	Georgia 2007/1	Virulent	2	8
8h C2 Geo 0.5_1	EP364R	14.9289	0.265113	8	Georgia 2007/1	Virulent	2	8
8h C2 Geo 0.5_1	H359L	14.1942	0.579687	8	Georgia 2007/1	Virulent	2	8
8h C2 Geo 0.5_1	K78R	12.5281	0.0684391	8	Georgia 2007/1	Virulent	2	7
8h C2 Geo 0.5_1	MGF110-7L	11.1149	1.62934	8	Georgia 2007/1	Virulent	2	4
8h C2 Geo 0.5_1	MGF360-15R	12.6484	0.218718	8	Georgia 2007/1	Virulent	2	8
8h C2 Geo 0.5_1	MGF360-8L	14.414	0.640656	8	Georgia 2007/1	Virulent	2	8
8h C2 Geo 0.5_1	MGF505-5R	15.7753	0.249448	8	Georgia 2007/1	Virulent	2	8
8h C2 Geo 0.5_1	A179L	13.0239	0.270989	8	Georgia 2007/1	Virulent	2	8
8h C2 Geo 0.5_1	B125R	14.6225	0.252927	8	Georgia 2007/1	Virulent	2	7
8h C2 Geo 0.5_1	C315R	13.6536	0.674207	8	Georgia 2007/1	Virulent	2	8
8h C2 Geo 0.5_1	E111R	12.262	0.352497	8	Georgia 2007/1	Virulent	2	7
8h C2 Geo 0.5_1	EP424R	14.2749	0.155604	8	Georgia 2007/1	Virulent	2	8
8h C2 Geo 0.5_1	I196L	15.5317	0.0833929	8	Georgia 2007/1	Virulent	2	7
8h C2 Geo 0.5_1	L60L	15.1603	0.0474897	8	Georgia 2007/1	Virulent	2	8
8h C2 Geo 0.5_1	MGF300-2R	14.8599	0.34865	8	Georgia 2007/1	Virulent	2	8
8h C2 Geo 0.5_1	MGF360-16R	13.6564	0.271491	8	Georgia 2007/1	Virulent	2	8
8h C2 Geo 0.5_1	MGF360-9L	13.5294	0.870877	8	Georgia 2007/1	Virulent	2	8
8h C2 Geo 0.5_1	S183L	18.9268	0.0600735	8	Georgia 2007/1	Virulent	2	7
8h C2 Geo 0.5_1	L83L	15.0801	0.0404982	8	Georgia 2007/1	Virulent	2	8
8h C2 Geo 0.5_1	B263R	22.6407	1.19953	8	Georgia 2007/1	Virulent	2	5
8h C2 Geo 0.5_1	C475L	15.0368	0.296858	8	Georgia 2007/1	Virulent	2	8
8h C2 Geo 0.5_1	E146L	15.8674	0.292341	8	Georgia 2007/1	Virulent	2	8
8h C2 Geo 0.5_1	F165R	14.1808	0.23383	8	Georgia 2007/1	Virulent	2	7
8h C2 Geo 0.5_1	I215L	14.6015	0.116318	8	Georgia 2007/1	Virulent	2	8
8h C2 Geo 0.5_1	MGF100-1R	14.6418	0.431065	8	Georgia 2007/1	Virulent	2	8
8h C2 Geo 0.5_1	MGF360-10L	12.8881	1.73093	8	Georgia 2007/1	Virulent	2	1
8h C2 Geo 0.5_1	MGF360-1L	14.7244	0.681936	8	Georgia 2007/1	Virulent	2	8
8h C2 Geo 0.5_1	MGF505-10R	15.4705	0.209193	8	Georgia 2007/1	Virulent	2	8
8h C2 Geo 0.5_1	MGF505-9R	14.9761	0.19101	8	Georgia 2007/1	Virulent	2	8
8h C2 Geo 0.5_1	285L	13.9272	0.546486	8	Georgia 2007/1	Virulent	2	8
8h C2 Geo 0.5_1	C962R	12.4831	1.51976	8	Georgia 2007/1	Virulent	2	3
8h C2 Geo 0.5_1	E184L	9.9466	1.21064	8	Georgia 2007/1	Virulent	2	3
8h C2 Geo 0.5_1	G-ACD-00600	11.4994	1.01096	8	Georgia 2007/1	Virulent	2
8h C2 Geo 0.5_1	I226R	12.7011	1.01174	8	Georgia 2007/1	Virulent	2	3
8h C2 Geo 0.5_1	MGF100-1L	11.3608	0.306667	8	Georgia 2007/1	Virulent	2	6
8h C2 Geo 0.5_1	MGF360-11L	14.1001	1.42436	8	Georgia 2007/1	Virulent	2	1
8h C2 Geo 0.5_1	MGF360-21R	14.6141	1.68042	8	Georgia 2007/1	Virulent	2	5
8h C2 Geo 0.5_1	MGF505-11L	14.6538	0.334586	8	Georgia 2007/1	Virulent	2	8
8h C2 Geo 0.5_1	O61R	13.4642	0.0689196	8	Georgia 2007/1	Virulent	2	7
8h C2 Geo 0.5_1	I267L	13.8478	1.36342	8	Georgia 2007/1	Virulent	2	3
8h C2 Geo 0.5_1	E199L	18.5825	0.162366	8	Georgia 2007/1	Virulent	2	7
8h C2 Geo 0.5_1	CP312R	10.8306	0.325037	8	Georgia 2007/1	Virulent	2	8
8h C2 Geo 0.5_1	B354L	11.5302	0.493742	8	Georgia 2007/1	Virulent	2	8
8h C2 Geo 0.5_1	A104R	23.4175	7.96207e-05	8	Georgia 2007/1	Virulent	2	7
8h C2 Geo 0.5_1	CP204L	10.3331	0.201876	8	Georgia 2007/1	Virulent	2	8
8h C2 Geo 0.5_1	MGF505-1R	14.5988	0.937687	8	Georgia 2007/1	Virulent	2	2
8h C2 Geo 0.5_1	MGF360-12L	14.9004	0.621907	8	Georgia 2007/1	Virulent	2	5
8h C2 Geo 0.5_1	MGF100-3L	15.2533	0.113955	8	Georgia 2007/1	Virulent	2	8
8h C2 Geo 0.5_1	I329L	15.5976	0.149215	8	Georgia 2007/1	Virulent	2	8
8h C2 Geo 0.5_1	H171R	13.9758	0.653794	8	Georgia 2007/1	Virulent	2	3
8h C2 Geo 0.5_1	E248R	17.8031	0.105378	8	Georgia 2007/1	Virulent	2	7
8h C2 Geo 0.5_1	CP80R	13.5573	0.40818	8	Georgia 2007/1	Virulent	2	8
8h C2 Geo 0.5_1	B385R	15.4344	0.477735	8	Georgia 2007/1	Virulent	2	7
8h C2 Geo 0.5_1	A137R	10.3388	1.1992	8	Georgia 2007/1	Virulent	2	3
8h C2 Geo 0.5_1	B646L	14.5577	0.0437723	8	Georgia 2007/1	Virulent	2	7
8h C2 Geo 0.5_1	MGF505-2R	16.2768	1.24863	8	Georgia 2007/1	Virulent	2	1
8h C2 Geo 0.5_1	MGF360-2L	14.4689	0.158195	8	Georgia 2007/1	Virulent	2	8
8h C2 Geo 0.5_1	MGF360-13L	16.37	0.693932	8	Georgia 2007/1	Virulent	2	2
8h C2 Geo 0.5_1	MGF110-2L	14.6659	0.260288	8	Georgia 2007/1	Virulent	2	8
8h C2 Geo 0.5_1	I8L	14.4507	0.381693	8	Georgia 2007/1	Virulent	2	8
8h C2 Geo 0.5_1	H233R	11.2749	1.01626	8	Georgia 2007/1	Virulent	2	3
8h C2 Geo 0.5_1	E301R	16.194	0.713232	8	Georgia 2007/1	Virulent	2	8
8h C2 Geo 0.5_1	B407L	12.5923	0.555931	8	Georgia 2007/1	Virulent	2	8
8h C2 Geo 0.5_1	A151R	10.983	0.357281	8	Georgia 2007/1	Virulent	2	8
8h C2 Geo 0.5_1	MGF505-7R	15.7193	0.169333	8	Georgia 2007/1	Virulent	2	8
8h C2 Geo 0.5_1	QP383R	17.4176	0.436847	8	Georgia 2007/1	Virulent	2	3
8h C2 Geo 0.5_1	MGF505-3R	14.5606	0.911633	8	Georgia 2007/1	Virulent	2
8h C2 Geo 0.5_1	MGF360-3L	13.2525	0.350937	8	Georgia 2007/1	Virulent	2	8
8h C2 Geo 0.5_1	K205R	10.8809	0.822557	8	Georgia 2007/1	Virulent	2	8
8h C2 Geo 0.5_1	H240R	11.5734	0.865253	8	Georgia 2007/1	Virulent	2	3
8h C2 Geo 0.5_1	DP238L	12.285	0.534794	8	Georgia 2007/1	Virulent	2	8
8h C2 Geo 0.5_1	B475L	12.6428	0.47414	8	Georgia 2007/1	Virulent	2	8
8h C2 Geo 0.5_1	A224L	12.5564	0.235291	8	Georgia 2007/1	Virulent	2	8
8h C2 Geo 0.5_1	R298L	13.6267	1.31801	8	Georgia 2007/1	Virulent	2	3
8h C2 Geo 0.5_1	MGF505-4R	16.818	0.164693	8	Georgia 2007/1	Virulent	2	8
8h C2 Geo 0.5_1	MGF360-4L	14.8542	0.508686	8	Georgia 2007/1	Virulent	2	8
8h C2 Geo 0.5_1	MGF360-14L	999	0	8	Georgia 2007/1	Virulent	2	2
8h C2 Geo 0.5_1	MGF110-4L	11.1825	0.333067	8	Georgia 2007/1	Virulent	2	8
48h C3 L60 1.5_1	A238L	12.9936	8.31172	48	L60	Virulent	3	8
48h C3 L60 1.5_1	B119L	11.8844	3.95885	48	L60	Virulent	3	7
48h C3 L60 1.5_1	C129R	10.6642	7.00071	48	L60	Virulent	3	8
48h C3 L60 1.5_1	DP96R	9.70519	9.16131	48	L60	Virulent	3	8
48h C3 L60 1.5_1	EP364R	12.5036	7.60761	48	L60	Virulent	3	8
48h C3 L60 1.5_1	H359L	13.3083	5.72267	48	L60	Virulent	3	8
48h C3 L60 1.5_1	K78R	8.176	7.46691	48	L60	Virulent	3	7
48h C3 L60 1.5_1	MGF110-7L	999	0	48	L60	Virulent	3	4
48h C3 L60 1.5_1	MGF360-15R	9.63776	9.4172	48	L60	Virulent	3	8
48h C3 L60 1.5_1	MGF360-8L	13.4098	6.86501	48	L60	Virulent	3	8
48h C3 L60 1.5_1	MGF505-5R	13.1893	8.00134	48	L60	Virulent	3	8
48h C3 L60 1.5_1	A179L	11.1355	5.35982	48	L60	Virulent	3	8
48h C3 L60 1.5_1	B125R	11.7094	10.178	48	L60	Virulent	3	7
48h C3 L60 1.5_1	C315R	12.7665	6.66158	48	L60	Virulent	3	8
48h C3 L60 1.5_1	E111R	10.4269	6.71923	48	L60	Virulent	3	7
48h C3 L60 1.5_1	EP424R	11.1304	7.35112	48	L60	Virulent	3	8
48h C3 L60 1.5_1	I196L	11.0338	10.0661	48	L60	Virulent	3	7
48h C3 L60 1.5_1	L60L	10.7752	5.30124	48	L60	Virulent	3	8
48h C3 L60 1.5_1	MGF300-2R	12.8261	7.62692	48	L60	Virulent	3	8
48h C3 L60 1.5_1	MGF360-16R	11.3039	7.40731	48	L60	Virulent	3	8
48h C3 L60 1.5_1	MGF360-9L	12.9963	6.73225	48	L60	Virulent	3	8
48h C3 L60 1.5_1	S183L	14.1469	8.81675	48	L60	Virulent	3	7
48h C3 L60 1.5_1	L83L	10.2509	6.1507	48	L60	Virulent	3	8
48h C3 L60 1.5_1	B263R	21.116	18.4375	48	L60	Virulent	3	5
48h C3 L60 1.5_1	C475L	12.7569	7.70225	48	L60	Virulent	3	8
48h C3 L60 1.5_1	E146L	14.1254	5.22392	48	L60	Virulent	3	8
48h C3 L60 1.5_1	F165R	11.6185	7.37819	48	L60	Virulent	3	7
48h C3 L60 1.5_1	I215L	11.6938	4.66299	48	L60	Virulent	3	8
48h C3 L60 1.5_1	MGF100-1R	999	0	48	L60	Virulent	3	8
48h C3 L60 1.5_1	MGF360-10L	12.4828	12.2464	48	L60	Virulent	3	1
48h C3 L60 1.5_1	MGF360-1L	14.1234	5.52549	48	L60	Virulent	3	8
48h C3 L60 1.5_1	MGF505-10R	12.9223	6.53675	48	L60	Virulent	3	8
48h C3 L60 1.5_1	MGF505-9R	12.6216	5.21888	48	L60	Virulent	3	8
48h C3 L60 1.5_1	285L	12.2071	9.61893	48	L60	Virulent	3	8
48h C3 L60 1.5_1	C962R	13.3439	4.47069	48	L60	Virulent	3	3
48h C3 L60 1.5_1	E184L	10.1714	5.53461	48	L60	Virulent	3	3
48h C3 L60 1.5_1	G-ACD-00600	14.2171	0.82102	48	L60	Virulent	3
48h C3 L60 1.5_1	I226R	12.509	6.17468	48	L60	Virulent	3	3
48h C3 L60 1.5_1	MGF100-1L	9.48791	0	48	L60	Virulent	3	6
48h C3 L60 1.5_1	MGF360-11L	13.1263	14.9456	48	L60	Virulent	3	1
48h C3 L60 1.5_1	MGF360-21R	999	0	48	L60	Virulent	3	5
48h C3 L60 1.5_1	MGF505-11L	12.5427	7.72235	48	L60	Virulent	3	8
48h C3 L60 1.5_1	O61R	8.8652	8.92303	48	L60	Virulent	3	7
48h C3 L60 1.5_1	I267L	14.0713	6.23885	48	L60	Virulent	3	3
48h C3 L60 1.5_1	E199L	16.024	5.10969	48	L60	Virulent	3	7
48h C3 L60 1.5_1	CP312R	8.74161	7.38754	48	L60	Virulent	3	8
48h C3 L60 1.5_1	B354L	10.3103	6.14404	48	L60	Virulent	3	8
48h C3 L60 1.5_1	A104R	8.8298	10.4735	48	L60	Virulent	3	7
48h C3 L60 1.5_1	CP204L	7.69029	6.7357	48	L60	Virulent	3	8
48h C3 L60 1.5_1	MGF505-1R	13.2023	13.1877	48	L60	Virulent	3	2
48h C3 L60 1.5_1	MGF360-12L	12.925	13.0651	48	L60	Virulent	3	5
48h C3 L60 1.5_1	MGF100-3L	10.9959	11.6429	48	L60	Virulent	3	8
48h C3 L60 1.5_1	I329L	13.0264	4.73771	48	L60	Virulent	3	8
48h C3 L60 1.5_1	H171R	13.0798	6.49939	48	L60	Virulent	3	3
48h C3 L60 1.5_1	E248R	13.8649	8.62976	48	L60	Virulent	3	7
48h C3 L60 1.5_1	CP80R	11.8705	7.02018	48	L60	Virulent	3	8
48h C3 L60 1.5_1	B385R	14.2903	5.64066	48	L60	Virulent	3	7
48h C3 L60 1.5_1	A137R	9.989	8.16411	48	L60	Virulent	3	3
48h C3 L60 1.5_1	B646L	9.72804	6.64975	48	L60	Virulent	3	7
48h C3 L60 1.5_1	MGF505-2R	14.5098	22.7034	48	L60	Virulent	3	1
48h C3 L60 1.5_1	MGF360-2L	11.392	7.13137	48	L60	Virulent	3	8
48h C3 L60 1.5_1	MGF360-13L	14.1368	17.4299	48	L60	Virulent	3	2
48h C3 L60 1.5_1	MGF110-2L	20.264	0.0287056	48	L60	Virulent	3	8
48h C3 L60 1.5_1	I8L	12.4072	8.40597	48	L60	Virulent	3	8
48h C3 L60 1.5_1	H233R	11.1602	5.8784	48	L60	Virulent	3	3
48h C3 L60 1.5_1	E301R	15.6368	5.6065	48	L60	Virulent	3	8
48h C3 L60 1.5_1	B407L	11.2249	7.66251	48	L60	Virulent	3	8
48h C3 L60 1.5_1	A151R	8.97023	7.70245	48	L60	Virulent	3	8
48h C3 L60 1.5_1	MGF505-7R	12.4935	8.46295	48	L60	Virulent	3	8
48h C3 L60 1.5_1	QP383R	16.0226	6.13762	48	L60	Virulent	3	3
48h C3 L60 1.5_1	MGF505-3R	12.6387	18.4548	48	L60	Virulent	3
48h C3 L60 1.5_1	MGF360-3L	11.2931	7.29079	48	L60	Virulent	3	8
48h C3 L60 1.5_1	K205R	9.94391	8.41318	48	L60	Virulent	3	8
48h C3 L60 1.5_1	H240R	11.074	6.53449	48	L60	Virulent	3	3
48h C3 L60 1.5_1	DP238L	11.1127	6.43872	48	L60	Virulent	3	8
48h C3 L60 1.5_1	B475L	10.8079	9.0363	48	L60	Virulent	3	8
48h C3 L60 1.5_1	A224L	10.0313	7.23567	48	L60	Virulent	3	8
48h C3 L60 1.5_1	R298L	13.9285	5.7121	48	L60	Virulent	3	3
48h C3 L60 1.5_1	MGF505-4R	13.5271	8.61122	48	L60	Virulent	3	8
48h C3 L60 1.5_1	MGF360-4L	13.2991	7.98596	48	L60	Virulent	3	8
48h C3 L60 1.5_1	MGF360-14L	13.138	56.5753	48	L60	Virulent	3	2
48h C3 L60 1.5_1	MGF110-4L	999	0	48	L60	Virulent	3	8
4h C1 881 1.5_1	A238L	16.722	0.10112	4	OURT88/1	Virulent	1	8
4h C1 881 1.5_1	B119L	20.3205	0.0018433	4	OURT88/1	Virulent	1	7
4h C1 881 1.5_1	C129R	16.9702	0.0142684	4	OURT88/1	Virulent	1	8
4h C1 881 1.5_1	DP96R	12.771	0.176441	4	OURT88/1	Virulent	1	8
4h C1 881 1.5_1	EP364R	20.817	0.00385644	4	OURT88/1	Virulent	1	8
4h C1 881 1.5_1	H359L	17.7904	0.0412946	4	OURT88/1	Virulent	1	8
4h C1 881 1.5_1	K78R	16.0459	0.00514734	4	OURT88/1	Virulent	1	7
4h C1 881 1.5_1	MGF110-7L	999	0	4	OURT88/1	Virulent	1	4
4h C1 881 1.5_1	MGF360-15R	12.6964	0.182271	4	OURT88/1	Virulent	1	8
4h C1 881 1.5_1	MGF360-8L	17.9496	0.0475959	4	OURT88/1	Virulent	1	8
4h C1 881 1.5_1	MGF505-5R	15.9248	0.193739	4	OURT88/1	Virulent	1	8
4h C1 881 1.5_1	A179L	13.3159	0.190676	4	OURT88/1	Virulent	1	8
4h C1 881 1.5_1	B125R	21.2109	0.00226429	4	OURT88/1	Virulent	1	7
4h C1 881 1.5_1	C315R	16.7704	0.0669587	4	OURT88/1	Virulent	1	8
4h C1 881 1.5_1	E111R	17.0312	0.0111367	4	OURT88/1	Virulent	1	7
4h C1 881 1.5_1	EP424R	17.7271	0.0122478	4	OURT88/1	Virulent	1	8
4h C1 881 1.5_1	I196L	23.5385	0.000279331	4	OURT88/1	Virulent	1	7
4h C1 881 1.5_1	L60L	17.5745	0.0076759	4	OURT88/1	Virulent	1	8
4h C1 881 1.5_1	MGF300-2R	16.0381	0.132728	4	OURT88/1	Virulent	1	8
4h C1 881 1.5_1	MGF360-16R	12.3459	0.58012	4	OURT88/1	Virulent	1	8
4h C1 881 1.5_1	MGF360-9L	16.8714	0.0739866	4	OURT88/1	Virulent	1	8
4h C1 881 1.5_1	S183L	23.0856	0.00289742	4	OURT88/1	Virulent	1	7
4h C1 881 1.5_1	L83L	15.488	0.026297	4	OURT88/1	Virulent	1	8
4h C1 881 1.5_1	B263R	21.6103	2.11084	4	OURT88/1	Virulent	1	5
4h C1 881 1.5_1	C475L	20.3379	0.00648653	4	OURT88/1	Virulent	1	8
4h C1 881 1.5_1	E146L	999	0	4	OURT88/1	Virulent	1	8
4h C1 881 1.5_1	F165R	23.5423	0.000306252	4	OURT88/1	Virulent	1	7
4h C1 881 1.5_1	I215L	12.7072	0.372503	4	OURT88/1	Virulent	1	8
4h C1 881 1.5_1	MGF100-1R	999	0	4	OURT88/1	Virulent	1	8
4h C1 881 1.5_1	MGF360-10L	15.1632	0.308072	4	OURT88/1	Virulent	1	1
4h C1 881 1.5_1	MGF360-1L	19.4417	0.022333	4	OURT88/1	Virulent	1	8
4h C1 881 1.5_1	MGF505-10R	15.065	0.238718	4	OURT88/1	Virulent	1	8
4h C1 881 1.5_1	MGF505-9R	14.1005	0.301936	4	OURT88/1	Virulent	1	8
4h C1 881 1.5_1	285L	15.3266	0.178474	4	OURT88/1	Virulent	1	8
4h C1 881 1.5_1	C962R	19.2995	0.0116173	4	OURT88/1	Virulent	1	3
4h C1 881 1.5_1	E184L	999	0	4	OURT88/1	Virulent	1	3
4h C1 881 1.5_1	G-ACD-00600	15.698	0.0474345	4	OURT88/1	Virulent	1
4h C1 881 1.5_1	I226R	999	0	4	OURT88/1	Virulent	1	3
4h C1 881 1.5_1	MGF100-1L	10.5232	0	4	OURT88/1	Virulent	1	6
4h C1 881 1.5_1	MGF360-11L	16.0315	0.32173	4	OURT88/1	Virulent	1	1
4h C1 881 1.5_1	MGF360-21R	999	0	4	OURT88/1	Virulent	1	5
4h C1 881 1.5_1	MGF505-11L	15.8178	0.128638	4	OURT88/1	Virulent	1	8
4h C1 881 1.5_1	O61R	21.8637	0.000175828	4	OURT88/1	Virulent	1	7
4h C1 881 1.5_1	I267L	16.5751	0.177378	4	OURT88/1	Virulent	1	3
4h C1 881 1.5_1	E199L	999	0	4	OURT88/1	Virulent	1	7
4h C1 881 1.5_1	CP312R	12.4108	0.0936427	4	OURT88/1	Virulent	1	8
4h C1 881 1.5_1	B354L	20.0119	0.00118994	4	OURT88/1	Virulent	1	8
4h C1 881 1.5_1	A104R	13.9152	0.0497447	4	OURT88/1	Virulent	1	7
4h C1 881 1.5_1	CP204L	10.3198	0.175531	4	OURT88/1	Virulent	1	8
4h C1 881 1.5_1	MGF505-1R	16.8712	0.167197	4	OURT88/1	Virulent	1	2
4h C1 881 1.5_1	MGF360-12L	14.8121	0.56961	4	OURT88/1	Virulent	1	5
4h C1 881 1.5_1	MGF100-3L	14.4968	0.16585	4	OURT88/1	Virulent	1	8
4h C1 881 1.5_1	I329L	15.0745	0.18473	4	OURT88/1	Virulent	1	8
4h C1 881 1.5_1	H171R	999	0	4	OURT88/1	Virulent	1	3
4h C1 881 1.5_1	E248R	21.8856	0.00535868	4	OURT88/1	Virulent	1	7
4h C1 881 1.5_1	CP80R	17.76	0.0190969	4	OURT88/1	Virulent	1	8
4h C1 881 1.5_1	B385R	26.2689	0.000225392	4	OURT88/1	Virulent	1	7
4h C1 881 1.5_1	A137R	22.0609	0.000305788	4	OURT88/1	Virulent	1	3
4h C1 881 1.5_1	B646L	999	0	4	OURT88/1	Virulent	1	7
4h C1 881 1.5_1	MGF505-2R	999	0	4	OURT88/1	Virulent	1	1
4h C1 881 1.5_1	MGF360-2L	20.1334	0.00268705	4	OURT88/1	Virulent	1	8
4h C1 881 1.5_1	MGF360-13L	20.1193	0.0444556	4	OURT88/1	Virulent	1	2
4h C1 881 1.5_1	MGF110-2L	20.3668	0.0043108	4	OURT88/1	Virulent	1	8
4h C1 881 1.5_1	I8L	14.6393	0.288535	4	OURT88/1	Virulent	1	8
4h C1 881 1.5_1	H233R	999	0	4	OURT88/1	Virulent	1	3
4h C1 881 1.5_1	E301R	21.3875	0.0167907	4	OURT88/1	Virulent	1	8
4h C1 881 1.5_1	B407L	999	0	4	OURT88/1	Virulent	1	8
4h C1 881 1.5_1	A151R	12.2344	0.129285	4	OURT88/1	Virulent	1	8
4h C1 881 1.5_1	MGF505-7R	13.6139	0.627753	4	OURT88/1	Virulent	1	8
4h C1 881 1.5_1	QP383R	999	0	4	OURT88/1	Virulent	1	3
4h C1 881 1.5_1	MGF505-3R	13.8076	1.32361	4	OURT88/1	Virulent	1
4h C1 881 1.5_1	MGF360-3L	17.857	0.0124271	4	OURT88/1	Virulent	1	8
4h C1 881 1.5_1	K205R	13.0699	0.155411	4	OURT88/1	Virulent	1	8
4h C1 881 1.5_1	H240R	999	0	4	OURT88/1	Virulent	1	3
4h C1 881 1.5_1	DP238L	13.0471	0.271665	4	OURT88/1	Virulent	1	8
4h C1 881 1.5_1	B475L	20.9472	0.00129203	4	OURT88/1	Virulent	1	8
4h C1 881 1.5_1	A224L	12.973	0.151864	4	OURT88/1	Virulent	1	8
4h C1 881 1.5_1	R298L	24.2285	0.000730653	4	OURT88/1	Virulent	1	3
4h C1 881 1.5_1	MGF505-4R	17.6429	0.0800935	4	OURT88/1	Virulent	1	8
4h C1 881 1.5_1	MGF360-4L	18.4766	0.0355848	4	OURT88/1	Virulent	1	8
4h C1 881 1.5_1	MGF360-14L	17.1712	0.55723	4	OURT88/1	Virulent	1	2
4h C1 881 1.5_1	MGF110-4L	999	0	4	OURT88/1	Virulent	1	8
4h C3 Geo 1.5_1	A238L	17.9731	0.0995168	4	Georgia 2007/1	Virulent	3	8
4h C3 Geo 1.5_1	B119L	21.5893	0.00179188	4	Georgia 2007/1	Virulent	3	7
4h C3 Geo 1.5_1	C129R	17.475	0.0235546	4	Georgia 2007/1	Virulent	3	8
4h C3 Geo 1.5_1	DP96R	12.7881	0.408428	4	Georgia 2007/1	Virulent	3	8
4h C3 Geo 1.5_1	EP364R	999	0	4	Georgia 2007/1	Virulent	3	8
4h C3 Geo 1.5_1	H359L	17.8288	0.0941904	4	Georgia 2007/1	Virulent	3	8
4h C3 Geo 1.5_1	K78R	16.3281	0.00991541	4	Georgia 2007/1	Virulent	3	7
4h C3 Geo 1.5_1	MGF110-7L	10.0583	6.83898	4	Georgia 2007/1	Virulent	3	4
4h C3 Geo 1.5_1	MGF360-15R	12.6908	0.428608	4	Georgia 2007/1	Virulent	3	8
4h C3 Geo 1.5_1	MGF360-8L	16.98	0.218335	4	Georgia 2007/1	Virulent	3	8
4h C3 Geo 1.5_1	MGF505-5R	16.0894	0.404914	4	Georgia 2007/1	Virulent	3	8
4h C3 Geo 1.5_1	A179L	13.9726	0.283337	4	Georgia 2007/1	Virulent	3	8
4h C3 Geo 1.5_1	B125R	999	0	4	Georgia 2007/1	Virulent	3	7
4h C3 Geo 1.5_1	C315R	18.3237	0.0534449	4	Georgia 2007/1	Virulent	3	8
4h C3 Geo 1.5_1	E111R	17.3606	0.0207613	4	Georgia 2007/1	Virulent	3	7
4h C3 Geo 1.5_1	EP424R	17.8691	0.0260013	4	Georgia 2007/1	Virulent	3	8
4h C3 Geo 1.5_1	I196L	21.5957	0.00251551	4	Georgia 2007/1	Virulent	3	7
4h C3 Geo 1.5_1	L60L	20.3449	0.00263526	4	Georgia 2007/1	Virulent	3	8
4h C3 Geo 1.5_1	MGF300-2R	16.3278	0.254349	4	Georgia 2007/1	Virulent	3	8
4h C3 Geo 1.5_1	MGF360-16R	12.9216	0.911741	4	Georgia 2007/1	Virulent	3	8
4h C3 Geo 1.5_1	MGF360-9L	15.6485	0.404548	4	Georgia 2007/1	Virulent	3	8
4h C3 Geo 1.5_1	S183L	999	0	4	Georgia 2007/1	Virulent	3	7
4h C3 Geo 1.5_1	L83L	17.211	0.0186602	4	Georgia 2007/1	Virulent	3	8
4h C3 Geo 1.5_1	B263R	23.4147	1.41556	4	Georgia 2007/1	Virulent	3	5
4h C3 Geo 1.5_1	C475L	21.4247	0.00715381	4	Georgia 2007/1	Virulent	3	8
4h C3 Geo 1.5_1	E146L	999	0	4	Georgia 2007/1	Virulent	3	8
4h C3 Geo 1.5_1	F165R	22.7709	0.00122447	4	Georgia 2007/1	Virulent	3	7
4h C3 Geo 1.5_1	I215L	12.409	1.07292	4	Georgia 2007/1	Virulent	3	8
4h C3 Geo 1.5_1	MGF100-1R	18.1053	0.0788599	4	Georgia 2007/1	Virulent	3	8
4h C3 Geo 1.5_1	MGF360-10L	15.4249	0.601943	4	Georgia 2007/1	Virulent	3	1
4h C3 Geo 1.5_1	MGF360-1L	16.842	0.317094	4	Georgia 2007/1	Virulent	3	8
4h C3 Geo 1.5_1	MGF505-10R	15.1629	0.522474	4	Georgia 2007/1	Virulent	3	8
4h C3 Geo 1.5_1	MGF505-9R	14.4574	0.552239	4	Georgia 2007/1	Virulent	3	8
4h C3 Geo 1.5_1	285L	14.8635	0.576307	4	Georgia 2007/1	Virulent	3	8
4h C3 Geo 1.5_1	C962R	999	0	4	Georgia 2007/1	Virulent	3	3
4h C3 Geo 1.5_1	E184L	999	0	4	Georgia 2007/1	Virulent	3	3
4h C3 Geo 1.5_1	G-ACD-00600	11.1984	2.51348	4	Georgia 2007/1	Virulent	3
4h C3 Geo 1.5_1	I226R	20.7608	0.00765212	4	Georgia 2007/1	Virulent	3	3
4h C3 Geo 1.5_1	MGF100-1L	11.7638	0.46802	4	Georgia 2007/1	Virulent	3	6
4h C3 Geo 1.5_1	MGF360-11L	16.5658	0.520383	4	Georgia 2007/1	Virulent	3	1
4h C3 Geo 1.5_1	MGF360-21R	18.337	0.256832	4	Georgia 2007/1	Virulent	3	5
4h C3 Geo 1.5_1	MGF505-11L	15.2282	0.453456	4	Georgia 2007/1	Virulent	3	8
4h C3 Geo 1.5_1	O61R	20.3437	0.00118127	4	Georgia 2007/1	Virulent	3	7
4h C3 Geo 1.5_1	I267L	15.5938	0.8203	4	Georgia 2007/1	Virulent	3	3
4h C3 Geo 1.5_1	E199L	999	0	4	Georgia 2007/1	Virulent	3	7
4h C3 Geo 1.5_1	CP312R	12.357	0.227689	4	Georgia 2007/1	Virulent	3	8
4h C3 Geo 1.5_1	B354L	21.1723	0.00124697	4	Georgia 2007/1	Virulent	3	8
4h C3 Geo 1.5_1	A104R	25.007	5.33905e-05	4	Georgia 2007/1	Virulent	3	7
4h C3 Geo 1.5_1	CP204L	10.6052	0.337374	4	Georgia 2007/1	Virulent	3	8
4h C3 Geo 1.5_1	MGF505-1R	17.6844	0.222904	4	Georgia 2007/1	Virulent	3	2
4h C3 Geo 1.5_1	MGF360-12L	15.7632	0.69013	4	Georgia 2007/1	Virulent	3	5
4h C3 Geo 1.5_1	MGF100-3L	16.1277	0.125438	4	Georgia 2007/1	Virulent	3	8
4h C3 Geo 1.5_1	I329L	15.7405	0.272725	4	Georgia 2007/1	Virulent	3	8
4h C3 Geo 1.5_1	H171R	999	0	4	Georgia 2007/1	Virulent	3	3
4h C3 Geo 1.5_1	E248R	21.105	0.0215626	4	Georgia 2007/1	Virulent	3	7
4h C3 Geo 1.5_1	CP80R	18.7143	0.023087	4	Georgia 2007/1	Virulent	3	8
4h C3 Geo 1.5_1	B385R	999	0	4	Georgia 2007/1	Virulent	3	7
4h C3 Geo 1.5_1	A137R	999	0	4	Georgia 2007/1	Virulent	3	3
4h C3 Geo 1.5_1	B646L	999	0	4	Georgia 2007/1	Virulent	3	7
4h C3 Geo 1.5_1	MGF505-2R	999	0	4	Georgia 2007/1	Virulent	3	1
4h C3 Geo 1.5_1	MGF360-2L	19.8094	0.00787892	4	Georgia 2007/1	Virulent	3	8
4h C3 Geo 1.5_1	MGF360-13L	20.0995	0.105574	4	Georgia 2007/1	Virulent	3	2
4h C3 Geo 1.5_1	MGF110-2L	14.2633	0.694312	4	Georgia 2007/1	Virulent	3	8
4h C3 Geo 1.5_1	I8L	16.153	0.236698	4	Georgia 2007/1	Virulent	3	8
4h C3 Geo 1.5_1	H233R	19.84	0.00541494	4	Georgia 2007/1	Virulent	3	3
4h C3 Geo 1.5_1	E301R	21.9246	0.0271054	4	Georgia 2007/1	Virulent	3	8
4h C3 Geo 1.5_1	B407L	999	0	4	Georgia 2007/1	Virulent	3	8
4h C3 Geo 1.5_1	A151R	11.9238	0.375592	4	Georgia 2007/1	Virulent	3	8
4h C3 Geo 1.5_1	MGF505-7R	15.6768	0.351943	4	Georgia 2007/1	Virulent	3	8
4h C3 Geo 1.5_1	QP383R	999	0	4	Georgia 2007/1	Virulent	3	3
4h C3 Geo 1.5_1	MGF505-3R	14.8429	1.51283	4	Georgia 2007/1	Virulent	3
4h C3 Geo 1.5_1	MGF360-3L	18.1901	0.0231096	4	Georgia 2007/1	Virulent	3	8
4h C3 Geo 1.5_1	K205R	14.5219	0.133061	4	Georgia 2007/1	Virulent	3	8
4h C3 Geo 1.5_1	H240R	20.7431	0.00303185	4	Georgia 2007/1	Virulent	3	3
4h C3 Geo 1.5_1	DP238L	13.6287	0.425236	4	Georgia 2007/1	Virulent	3	8
4h C3 Geo 1.5_1	B475L	22.3795	0.00112145	4	Georgia 2007/1	Virulent	3	8
4h C3 Geo 1.5_1	A224L	13.507	0.245686	4	Georgia 2007/1	Virulent	3	8
4h C3 Geo 1.5_1	R298L	999	0	4	Georgia 2007/1	Virulent	3	3
4h C3 Geo 1.5_1	MGF505-4R	18.4622	0.106327	4	Georgia 2007/1	Virulent	3	8
4h C3 Geo 1.5_1	MGF360-4L	18.5883	0.0771434	4	Georgia 2007/1	Virulent	3	8
4h C3 Geo 1.5_1	MGF360-14L	999	0	4	Georgia 2007/1	Virulent	3	2
4h C3 Geo 1.5_1	MGF110-4L	10.6606	0.965044	4	Georgia 2007/1	Virulent	3	8
24h C2 NHP 0.5_1	A238L	13.5636	1.3111	24	NH/P68	Attenuated	2	8
24h C2 NHP 0.5_1	B119L	10.1931	2.99407	24	NH/P68	Attenuated	2	7
24h C2 NHP 0.5_1	C129R	10.4334	1.92377	24	NH/P68	Attenuated	2	8
24h C2 NHP 0.5_1	DP96R	10.6649	1.10307	24	NH/P68	Attenuated	2	8
24h C2 NHP 0.5_1	EP364R	12.2704	2.09405	24	NH/P68	Attenuated	2	8
24h C2 NHP 0.5_1	H359L	12.4137	2.49149	24	NH/P68	Attenuated	2	8
24h C2 NHP 0.5_1	K78R	8.17632	1.74822	24	NH/P68	Attenuated	2	7
24h C2 NHP 0.5_1	MGF110-7L	999	0	24	NH/P68	Attenuated	2	4
24h C2 NHP 0.5_1	MGF360-15R	10.6549	1.08962	24	NH/P68	Attenuated	2	8
24h C2 NHP 0.5_1	MGF360-8L	13.3255	1.70436	24	NH/P68	Attenuated	2	8
24h C2 NHP 0.5_1	MGF505-5R	13.9784	1.08433	24	NH/P68	Attenuated	2	8
24h C2 NHP 0.5_1	A179L	11.0247	1.35538	24	NH/P68	Attenuated	2	8
24h C2 NHP 0.5_1	B125R	12.2126	1.68161	24	NH/P68	Attenuated	2	7
24h C2 NHP 0.5_1	C315R	12.2816	2.18318	24	NH/P68	Attenuated	2	8
24h C2 NHP 0.5_1	E111R	10.2323	1.80065	24	NH/P68	Attenuated	2	7
24h C2 NHP 0.5_1	EP424R	11.1658	1.67969	24	NH/P68	Attenuated	2	8
24h C2 NHP 0.5_1	I196L	11.6007	1.59141	24	NH/P68	Attenuated	2	7
24h C2 NHP 0.5_1	L60L	10.597	1.40469	24	NH/P68	Attenuated	2	8
24h C2 NHP 0.5_1	MGF300-2R	13.1669	1.41028	24	NH/P68	Attenuated	2	8
24h C2 NHP 0.5_1	MGF360-16R	11.6173	1.39588	24	NH/P68	Attenuated	2	8
24h C2 NHP 0.5_1	MGF360-9L	13.1344	1.43263	24	NH/P68	Attenuated	2	8
24h C2 NHP 0.5_1	S183L	14.4204	1.7081	24	NH/P68	Attenuated	2	7
24h C2 NHP 0.5_1	L83L	10.2779	1.41364	24	NH/P68	Attenuated	2	8
24h C2 NHP 0.5_1	B263R	21.8413	2.61176	24	NH/P68	Attenuated	2	5
24h C2 NHP 0.5_1	C475L	12.6045	2.00466	24	NH/P68	Attenuated	2	8
24h C2 NHP 0.5_1	E146L	13.721	1.61909	24	NH/P68	Attenuated	2	8
24h C2 NHP 0.5_1	F165R	11.3103	2.1394	24	NH/P68	Attenuated	2	7
24h C2 NHP 0.5_1	I215L	11.5828	1.17936	24	NH/P68	Attenuated	2	8
24h C2 NHP 0.5_1	MGF100-1R	12.6217	2.18743	24	NH/P68	Attenuated	2	8
24h C2 NHP 0.5_1	MGF360-10L	999	0	24	NH/P68	Attenuated	2	1
24h C2 NHP 0.5_1	MGF360-1L	14.4922	1.00212	24	NH/P68	Attenuated	2	8
24h C2 NHP 0.5_1	MGF505-10R	12.682	1.80825	24	NH/P68	Attenuated	2	8
24h C2 NHP 0.5_1	MGF505-9R	12.5943	1.2455	24	NH/P68	Attenuated	2	8
24h C2 NHP 0.5_1	285L	13.7566	0.769496	24	NH/P68	Attenuated	2	8
24h C2 NHP 0.5_1	C962R	11.4349	3.93175	24	NH/P68	Attenuated	2	3
24h C2 NHP 0.5_1	E184L	8.95373	3.01423	24	NH/P68	Attenuated	2	3
24h C2 NHP 0.5_1	G-ACD-00600	15.2374	0.0947943	24	NH/P68	Attenuated	2
24h C2 NHP 0.5_1	I226R	11.2725	3.40718	24	NH/P68	Attenuated	2	3
24h C2 NHP 0.5_1	MGF100-1L	10.1768	0	24	NH/P68	Attenuated	2	6
24h C2 NHP 0.5_1	MGF360-11L	24.317	0.00149732	24	NH/P68	Attenuated	2	1
24h C2 NHP 0.5_1	MGF360-21R	24.525	0.00218378	24	NH/P68	Attenuated	2	5
24h C2 NHP 0.5_1	MGF505-11L	12.486	1.88085	24	NH/P68	Attenuated	2	8
24h C2 NHP 0.5_1	O61R	9.25586	1.5939	24	NH/P68	Attenuated	2	7
24h C2 NHP 0.5_1	I267L	13.2894	2.51204	24	NH/P68	Attenuated	2	3
24h C2 NHP 0.5_1	E199L	15.9896	1.22548	24	NH/P68	Attenuated	2	7
24h C2 NHP 0.5_1	CP312R	10.0401	0.70332	24	NH/P68	Attenuated	2	8
24h C2 NHP 0.5_1	B354L	9.43963	2.63089	24	NH/P68	Attenuated	2	8
24h C2 NHP 0.5_1	A104R	9.23273	1.855	24	NH/P68	Attenuated	2	7
24h C2 NHP 0.5_1	CP204L	8.87623	0.693309	24	NH/P68	Attenuated	2	8
24h C2 NHP 0.5_1	MGF505-1R	999	0	24	NH/P68	Attenuated	2	2
24h C2 NHP 0.5_1	MGF360-12L	17.8594	0.100062	24	NH/P68	Attenuated	2	5
24h C2 NHP 0.5_1	MGF100-3L	12.1754	1.2038	24	NH/P68	Attenuated	2	8
24h C2 NHP 0.5_1	I329L	12.2311	1.92544	24	NH/P68	Attenuated	2	8
24h C2 NHP 0.5_1	H171R	12.1741	2.85156	24	NH/P68	Attenuated	2	3
24h C2 NHP 0.5_1	E248R	14.1381	1.67225	24	NH/P68	Attenuated	2	7
24h C2 NHP 0.5_1	CP80R	11.6245	1.9496	24	NH/P68	Attenuated	2	8
24h C2 NHP 0.5_1	B385R	13.3393	2.55358	24	NH/P68	Attenuated	2	7
24h C2 NHP 0.5_1	A137R	9.29781	3.08691	24	NH/P68	Attenuated	2	3
24h C2 NHP 0.5_1	B646L	9.29182	2.10702	24	NH/P68	Attenuated	2	7
24h C2 NHP 0.5_1	MGF505-2R	999	0	24	NH/P68	Attenuated	2	1
24h C2 NHP 0.5_1	MGF360-2L	10.9579	2.25625	24	NH/P68	Attenuated	2	8
24h C2 NHP 0.5_1	MGF360-13L	999	0	24	NH/P68	Attenuated	2	2
24h C2 NHP 0.5_1	MGF110-2L	13.107	0.95942	24	NH/P68	Attenuated	2	8
24h C2 NHP 0.5_1	I8L	12.922	1.37772	24	NH/P68	Attenuated	2	8
24h C2 NHP 0.5_1	H233R	9.97575	3.12871	24	NH/P68	Attenuated	2	3
24h C2 NHP 0.5_1	E301R	13.9734	4.1586	24	NH/P68	Attenuated	2	8
24h C2 NHP 0.5_1	B407L	10.7686	2.46202	24	NH/P68	Attenuated	2	8
24h C2 NHP 0.5_1	A151R	9.41589	1.32441	24	NH/P68	Attenuated	2	8
24h C2 NHP 0.5_1	MGF505-7R	13.5565	0.94861	24	NH/P68	Attenuated	2	8
24h C2 NHP 0.5_1	QP383R	14.4655	4.22933	24	NH/P68	Attenuated	2	3
24h C2 NHP 0.5_1	MGF505-3R	999	0	24	NH/P68	Attenuated	2
24h C2 NHP 0.5_1	MGF360-3L	11.2758	1.72804	24	NH/P68	Attenuated	2	8
24h C2 NHP 0.5_1	K205R	9.82755	2.13569	24	NH/P68	Attenuated	2	8
24h C2 NHP 0.5_1	H240R	9.85915	3.55182	24	NH/P68	Attenuated	2	3
24h C2 NHP 0.5_1	DP238L	11.4871	1.16316	24	NH/P68	Attenuated	2	8
24h C2 NHP 0.5_1	B475L	10.4741	2.667	24	NH/P68	Attenuated	2	8
24h C2 NHP 0.5_1	A224L	10.1006	1.61494	24	NH/P68	Attenuated	2	8
24h C2 NHP 0.5_1	R298L	12.3142	4.09527	24	NH/P68	Attenuated	2	3
24h C2 NHP 0.5_1	MGF505-4R	13.6407	1.86388	24	NH/P68	Attenuated	2	8
24h C2 NHP 0.5_1	MGF360-4L	13.3727	1.77708	24	NH/P68	Attenuated	2	8
24h C2 NHP 0.5_1	MGF360-14L	999	0	24	NH/P68	Attenuated	2	2
24h C2 NHP 0.5_1	MGF110-4L	9.1796	1.67008	24	NH/P68	Attenuated	2	8
2h C1 883 0.5_1	A238L	21.5805	0.00350327	2	OURT88/3	Attenuated	1	8
2h C1 883 0.5_1	B119L	23.4119	0.000217363	2	OURT88/3	Attenuated	1	7
2h C1 883 0.5_1	C129R	999	0	2	OURT88/3	Attenuated	1	8
2h C1 883 0.5_1	DP96R	17.0878	0.0088983	2	OURT88/3	Attenuated	1	8
2h C1 883 0.5_1	EP364R	999	0	2	OURT88/3	Attenuated	1	8
2h C1 883 0.5_1	H359L	21.8443	0.00249891	2	OURT88/3	Attenuated	1	8
2h C1 883 0.5_1	K78R	999	0	2	OURT88/3	Attenuated	1	7
2h C1 883 0.5_1	MGF110-7L	999	0	2	OURT88/3	Attenuated	1	4
2h C1 883 0.5_1	MGF360-15R	17.228	0.00792037	2	OURT88/3	Attenuated	1	8
2h C1 883 0.5_1	MGF360-8L	999	0	2	OURT88/3	Attenuated	1	8
2h C1 883 0.5_1	MGF505-5R	999	0	2	OURT88/3	Attenuated	1	8
2h C1 883 0.5_1	A179L	17.4981	0.0105569	2	OURT88/3	Attenuated	1	8
2h C1 883 0.5_1	B125R	999	0	2	OURT88/3	Attenuated	1	7
2h C1 883 0.5_1	C315R	999	0	2	OURT88/3	Attenuated	1	8
2h C1 883 0.5_1	E111R	999	0	2	OURT88/3	Attenuated	1	7
2h C1 883 0.5_1	EP424R	999	0	2	OURT88/3	Attenuated	1	8
2h C1 883 0.5_1	I196L	999	0	2	OURT88/3	Attenuated	1	7
2h C1 883 0.5_1	L60L	22.2244	0.000307288	2	OURT88/3	Attenuated	1	8
2h C1 883 0.5_1	MGF300-2R	999	0	2	OURT88/3	Attenuated	1	8
2h C1 883 0.5_1	MGF360-16R	20.0623	0.00277228	2	OURT88/3	Attenuated	1	8
2h C1 883 0.5_1	MGF360-9L	999	0	2	OURT88/3	Attenuated	1	8
2h C1 883 0.5_1	S183L	999	0	2	OURT88/3	Attenuated	1	7
2h C1 883 0.5_1	L83L	999	0	2	OURT88/3	Attenuated	1	8
2h C1 883 0.5_1	B263R	22.6995	0.997122	2	OURT88/3	Attenuated	1	5
2h C1 883 0.5_1	C475L	999	0	2	OURT88/3	Attenuated	1	8
2h C1 883 0.5_1	E146L	22.5617	0.00244417	2	OURT88/3	Attenuated	1	8
2h C1 883 0.5_1	F165R	999	0	2	OURT88/3	Attenuated	1	7
2h C1 883 0.5_1	I215L	19.2281	0.00407711	2	OURT88/3	Attenuated	1	8
2h C1 883 0.5_1	MGF100-1R	22.5246	0.0015814	2	OURT88/3	Attenuated	1	8
2h C1 883 0.5_1	MGF360-10L	999	0	2	OURT88/3	Attenuated	1	1
2h C1 883 0.5_1	MGF360-1L	999	0	2	OURT88/3	Attenuated	1	8
2h C1 883 0.5_1	MGF505-10R	21.4173	0.00293658	2	OURT88/3	Attenuated	1	8
2h C1 883 0.5_1	MGF505-9R	19.2453	0.00857766	2	OURT88/3	Attenuated	1	8
2h C1 883 0.5_1	285L	999	0	2	OURT88/3	Attenuated	1	8
2h C1 883 0.5_1	C962R	22.3138	0.00144512	2	OURT88/3	Attenuated	1	3
2h C1 883 0.5_1	E184L	999	0	2	OURT88/3	Attenuated	1	3
2h C1 883 0.5_1	G-ACD-00600	21.6928	0.000747612	2	OURT88/3	Attenuated	1
2h C1 883 0.5_1	I226R	999	0	2	OURT88/3	Attenuated	1	3
2h C1 883 0.5_1	MGF100-1L	16.9645	0	2	OURT88/3	Attenuated	1	6
2h C1 883 0.5_1	MGF360-11L	23.1896	0.00226392	2	OURT88/3	Attenuated	1	1
2h C1 883 0.5_1	MGF360-21R	999	0	2	OURT88/3	Attenuated	1	5
2h C1 883 0.5_1	MGF505-11L	999	0	2	OURT88/3	Attenuated	1	8
2h C1 883 0.5_1	O61R	24.1401	3.64779e-05	2	OURT88/3	Attenuated	1	7
2h C1 883 0.5_1	I267L	23.9879	0.00104623	2	OURT88/3	Attenuated	1	3
2h C1 883 0.5_1	E199L	999	0	2	OURT88/3	Attenuated	1	7
2h C1 883 0.5_1	CP312R	999	0	2	OURT88/3	Attenuated	1	8
2h C1 883 0.5_1	B354L	23.6107	9.87072e-05	2	OURT88/3	Attenuated	1	8
2h C1 883 0.5_1	A104R	20.618	0.000479982	2	OURT88/3	Attenuated	1	7
2h C1 883 0.5_1	CP204L	18.5791	0.000575773	2	OURT88/3	Attenuated	1	8
2h C1 883 0.5_1	MGF505-1R	999	0	2	OURT88/3	Attenuated	1	2
2h C1 883 0.5_1	MGF360-12L	17.4082	0.0946833	2	OURT88/3	Attenuated	1	5
2h C1 883 0.5_1	MGF100-3L	999	0	2	OURT88/3	Attenuated	1	8
2h C1 883 0.5_1	I329L	22.4484	0.00111941	2	OURT88/3	Attenuated	1	8
2h C1 883 0.5_1	H171R	999	0	2	OURT88/3	Attenuated	1	3
2h C1 883 0.5_1	E248R	23.9463	0.00129099	2	OURT88/3	Attenuated	1	7
2h C1 883 0.5_1	CP80R	999	0	2	OURT88/3	Attenuated	1	8
2h C1 883 0.5_1	B385R	999	0	2	OURT88/3	Attenuated	1	7
2h C1 883 0.5_1	A137R	999	0	2	OURT88/3	Attenuated	1	3
2h C1 883 0.5_1	B646L	999	0	2	OURT88/3	Attenuated	1	7
2h C1 883 0.5_1	MGF505-2R	999	0	2	OURT88/3	Attenuated	1	1
2h C1 883 0.5_1	MGF360-2L	21.0075	0.00147343	2	OURT88/3	Attenuated	1	8
2h C1 883 0.5_1	MGF360-13L	999	0	2	OURT88/3	Attenuated	1	2
2h C1 883 0.5_1	MGF110-2L	17.2935	0.0364668	2	OURT88/3	Attenuated	1	8
2h C1 883 0.5_1	I8L	22.4827	0.00126271	2	OURT88/3	Attenuated	1	8
2h C1 883 0.5_1	H233R	999	0	2	OURT88/3	Attenuated	1	3
2h C1 883 0.5_1	E301R	21.5271	0.0153199	2	OURT88/3	Attenuated	1	8
2h C1 883 0.5_1	B407L	999	0	2	OURT88/3	Attenuated	1	8
2h C1 883 0.5_1	A151R	999	0	2	OURT88/3	Attenuated	1	8
2h C1 883 0.5_1	MGF505-7R	21.8907	0.00203423	2	OURT88/3	Attenuated	1	8
2h C1 883 0.5_1	QP383R	999	0	2	OURT88/3	Attenuated	1	3
2h C1 883 0.5_1	MGF505-3R	999	0	2	OURT88/3	Attenuated	1
2h C1 883 0.5_1	MGF360-3L	999	0	2	OURT88/3	Attenuated	1	8
2h C1 883 0.5_1	K205R	999	0	2	OURT88/3	Attenuated	1	8
2h C1 883 0.5_1	H240R	999	0	2	OURT88/3	Attenuated	1	3
2h C1 883 0.5_1	DP238L	21.7305	0.000664153	2	OURT88/3	Attenuated	1	8
2h C1 883 0.5_1	B475L	999	0	2	OURT88/3	Attenuated	1	8
2h C1 883 0.5_1	A224L	17.6364	0.00602311	2	OURT88/3	Attenuated	1	8
2h C1 883 0.5_1	R298L	999	0	2	OURT88/3	Attenuated	1	3
2h C1 883 0.5_1	MGF505-4R	999	0	2	OURT88/3	Attenuated	1	8
2h C1 883 0.5_1	MGF360-4L	999	0	2	OURT88/3	Attenuated	1	8
2h C1 883 0.5_1	MGF360-14L	999	0	2	OURT88/3	Attenuated	1	2
2h C1 883 0.5_1	MGF110-4L	13.5948	0.0541766	2	OURT88/3	Attenuated	1	8
2h C1 L60 1.5_1	A238L	18.781	0.0188307	2	L60	Virulent	1	8
2h C1 L60 1.5_1	B119L	20.4235	0.00133176	2	L60	Virulent	1	7
2h C1 L60 1.5_1	C129R	999	0	2	L60	Virulent	1	8
2h C1 L60 1.5_1	DP96R	15.6491	0.018623	2	L60	Virulent	1	8
2h C1 L60 1.5_1	EP364R	999	0	2	L60	Virulent	1	8
2h C1 L60 1.5_1	H359L	19.4548	0.0101092	2	L60	Virulent	1	8
2h C1 L60 1.5_1	K78R	20.6183	0.000167884	2	L60	Virulent	1	7
2h C1 L60 1.5_1	MGF110-7L	999	0	2	L60	Virulent	1	4
2h C1 L60 1.5_1	MGF360-15R	15.5198	0.019982	2	L60	Virulent	1	8
2h C1 L60 1.5_1	MGF360-8L	999	0	2	L60	Virulent	1	8
2h C1 L60 1.5_1	MGF505-5R	999	0	2	L60	Virulent	1	8
2h C1 L60 1.5_1	A179L	18.0534	0.00554678	2	L60	Virulent	1	8
2h C1 L60 1.5_1	B125R	999	0	2	L60	Virulent	1	7
2h C1 L60 1.5_1	C315R	999	0	2	L60	Virulent	1	8
2h C1 L60 1.5_1	E111R	22.8214	0.000156165	2	L60	Virulent	1	7
2h C1 L60 1.5_1	EP424R	22.3805	0.000377659	2	L60	Virulent	1	8
2h C1 L60 1.5_1	I196L	23.5202	0.000219516	2	L60	Virulent	1	7
2h C1 L60 1.5_1	L60L	22.8253	0.000156426	2	L60	Virulent	1	8
2h C1 L60 1.5_1	MGF300-2R	22.3742	0.00127493	2	L60	Virulent	1	8
2h C1 L60 1.5_1	MGF360-16R	18.3932	0.006807	2	L60	Virulent	1	8
2h C1 L60 1.5_1	MGF360-9L	999	0	2	L60	Virulent	1	8
2h C1 L60 1.5_1	S183L	20.4732	0.013749	2	L60	Virulent	1	7
2h C1 L60 1.5_1	L83L	999	0	2	L60	Virulent	1	8
2h C1 L60 1.5_1	B263R	19.8839	5.4198	2	L60	Virulent	1	5
2h C1 L60 1.5_1	C475L	22.3114	0.00128167	2	L60	Virulent	1	8
2h C1 L60 1.5_1	E146L	21.7909	0.00321987	2	L60	Virulent	1	8
2h C1 L60 1.5_1	F165R	999	0	2	L60	Virulent	1	7
2h C1 L60 1.5_1	I215L	19.8054	0.00210965	2	L60	Virulent	1	8
2h C1 L60 1.5_1	MGF100-1R	999	0	2	L60	Virulent	1	8
2h C1 L60 1.5_1	MGF360-10L	23.3368	0.000827979	2	L60	Virulent	1	1
2h C1 L60 1.5_1	MGF360-1L	999	0	2	L60	Virulent	1	8
2h C1 L60 1.5_1	MGF505-10R	999	0	2	L60	Virulent	1	8
2h C1 L60 1.5_1	MGF505-9R	19.4467	0.00575974	2	L60	Virulent	1	8
2h C1 L60 1.5_1	285L	18.2165	0.0186849	2	L60	Virulent	1	8
2h C1 L60 1.5_1	C962R	19.18	0.00979317	2	L60	Virulent	1	3
2h C1 L60 1.5_1	E184L	999	0	2	L60	Virulent	1	3
2h C1 L60 1.5_1	G-ACD-00600	18.7133	0.00455239	2	L60	Virulent	1
2h C1 L60 1.5_1	I226R	21.5675	0.00144911	2	L60	Virulent	1	3
2h C1 L60 1.5_1	MGF100-1L	16.1843	0	2	L60	Virulent	1	6
2h C1 L60 1.5_1	MGF360-11L	18.7979	0.0366906	2	L60	Virulent	1	1
2h C1 L60 1.5_1	MGF360-21R	999	0	2	L60	Virulent	1	5
2h C1 L60 1.5_1	MGF505-11L	999	0	2	L60	Virulent	1	8
2h C1 L60 1.5_1	O61R	999	0	2	L60	Virulent	1	7
2h C1 L60 1.5_1	I267L	999	0	2	L60	Virulent	1	3
2h C1 L60 1.5_1	E199L	999	0	2	L60	Virulent	1	7
2h C1 L60 1.5_1	CP312R	21.7771	0.000110105	2	L60	Virulent	1	8
2h C1 L60 1.5_1	B354L	20.6604	0.000589022	2	L60	Virulent	1	8
2h C1 L60 1.5_1	A104R	18.7546	0.00134839	2	L60	Virulent	1	7
2h C1 L60 1.5_1	CP204L	16.4289	0.00197322	2	L60	Virulent	1	8
2h C1 L60 1.5_1	MGF505-1R	20.7236	0.00898259	2	L60	Virulent	1	2
2h C1 L60 1.5_1	MGF360-12L	15.6054	0.255044	2	L60	Virulent	1	5
2h C1 L60 1.5_1	MGF100-3L	18.6122	0.00742526	2	L60	Virulent	1	8
2h C1 L60 1.5_1	I329L	20.577	0.00316224	2	L60	Virulent	1	8
2h C1 L60 1.5_1	H171R	24.8591	0.000231387	2	L60	Virulent	1	3
2h C1 L60 1.5_1	E248R	21.3842	0.0058863	2	L60	Virulent	1	7
2h C1 L60 1.5_1	CP80R	999	0	2	L60	Virulent	1	8
2h C1 L60 1.5_1	B385R	999	0	2	L60	Virulent	1	7
2h C1 L60 1.5_1	A137R	24.3668	4.79896e-05	2	L60	Virulent	1	3
2h C1 L60 1.5_1	B646L	999	0	2	L60	Virulent	1	7
2h C1 L60 1.5_1	MGF505-2R	999	0	2	L60	Virulent	1	1
2h C1 L60 1.5_1	MGF360-2L	18.8673	0.00501476	2	L60	Virulent	1	8
2h C1 L60 1.5_1	MGF360-13L	999	0	2	L60	Virulent	1	2
2h C1 L60 1.5_1	MGF110-2L	19.5653	0.00583048	2	L60	Virulent	1	8
2h C1 L60 1.5_1	I8L	21.7778	0.0015891	2	L60	Virulent	1	8
2h C1 L60 1.5_1	H233R	999	0	2	L60	Virulent	1	3
2h C1 L60 1.5_1	E301R	20.0506	0.0329136	2	L60	Virulent	1	8
2h C1 L60 1.5_1	B407L	21.0383	0.00106571	2	L60	Virulent	1	8
2h C1 L60 1.5_1	A151R	21.8671	0.000126374	2	L60	Virulent	1	8
2h C1 L60 1.5_1	MGF505-7R	27.6209	2.95879e-05	2	L60	Virulent	1	8
2h C1 L60 1.5_1	QP383R	999	0	2	L60	Virulent	1	3
2h C1 L60 1.5_1	MGF505-3R	15.3728	0.347081	2	L60	Virulent	1
2h C1 L60 1.5_1	MGF360-3L	21.1993	0.000950834	2	L60	Virulent	1	8
2h C1 L60 1.5_1	K205R	999	0	2	L60	Virulent	1	8
2h C1 L60 1.5_1	H240R	999	0	2	L60	Virulent	1	3
2h C1 L60 1.5_1	DP238L	19.0107	0.0033779	2	L60	Virulent	1	8
2h C1 L60 1.5_1	B475L	999	0	2	L60	Virulent	1	8
2h C1 L60 1.5_1	A224L	16.869	0.00791599	2	L60	Virulent	1	8
2h C1 L60 1.5_1	R298L	21.7235	0.00321837	2	L60	Virulent	1	3
2h C1 L60 1.5_1	MGF505-4R	20.2486	0.0102106	2	L60	Virulent	1	8
2h C1 L60 1.5_1	MGF360-4L	21.2919	0.00392318	2	L60	Virulent	1	8
2h C1 L60 1.5_1	MGF360-14L	999	0	2	L60	Virulent	1	2
2h C1 L60 1.5_1	MGF110-4L	999	0	2	L60	Virulent	1	8
8h C2 881 0.5_1	A238L	14.7416	0.305769	8	OURT88/1	Virulent	2	8
8h C2 881 0.5_1	B119L	15.733	0.0339579	8	OURT88/1	Virulent	2	7
8h C2 881 0.5_1	C129R	12.2509	0.288008	8	OURT88/1	Virulent	2	8
8h C2 881 0.5_1	DP96R	12.4985	0.163302	8	OURT88/1	Virulent	2	8
8h C2 881 0.5_1	EP364R	14.9242	0.175574	8	OURT88/1	Virulent	2	8
8h C2 881 0.5_1	H359L	13.6872	0.543815	8	OURT88/1	Virulent	2	8
8h C2 881 0.5_1	K78R	13.16	0.0291543	8	OURT88/1	Virulent	2	7
8h C2 881 0.5_1	MGF110-7L	999	0	8	OURT88/1	Virulent	2	4
8h C2 881 0.5_1	MGF360-15R	12.4928	0.160834	8	OURT88/1	Virulent	2	8
8h C2 881 0.5_1	MGF360-8L	14.9511	0.291462	8	OURT88/1	Virulent	2	8
8h C2 881 0.5_1	MGF505-5R	15.2908	0.230394	8	OURT88/1	Virulent	2	8
8h C2 881 0.5_1	A179L	12.6712	0.228435	8	OURT88/1	Virulent	2	8
8h C2 881 0.5_1	B125R	15.5059	0.0905111	8	OURT88/1	Virulent	2	7
8h C2 881 0.5_1	C315R	13.4365	0.517349	8	OURT88/1	Virulent	2	8
8h C2 881 0.5_1	E111R	12.078	0.264351	8	OURT88/1	Virulent	2	7
8h C2 881 0.5_1	EP424R	13.7693	0.145838	8	OURT88/1	Virulent	2	8
8h C2 881 0.5_1	I196L	15.742	0.0475862	8	OURT88/1	Virulent	2	7
8h C2 881 0.5_1	L60L	14.8487	0.038908	8	OURT88/1	Virulent	2	8
8h C2 881 0.5_1	MGF300-2R	14.2427	0.353051	8	OURT88/1	Virulent	2	8
8h C2 881 0.5_1	MGF360-16R	12.8454	0.314434	8	OURT88/1	Virulent	2	8
8h C2 881 0.5_1	MGF360-9L	14.0731	0.394383	8	OURT88/1	Virulent	2	8
8h C2 881 0.5_1	S183L	20.0972	0.0176191	8	OURT88/1	Virulent	2	7
8h C2 881 0.5_1	L83L	13.6872	0.0702095	8	OURT88/1	Virulent	2	8
8h C2 881 0.5_1	B263R	24.7793	0.179825	8	OURT88/1	Virulent	2	5
8h C2 881 0.5_1	C475L	15.3348	0.159397	8	OURT88/1	Virulent	2	8
8h C2 881 0.5_1	E146L	15.7981	0.202482	8	OURT88/1	Virulent	2	8
8h C2 881 0.5_1	F165R	14.307	0.141429	8	OURT88/1	Virulent	2	7
8h C2 881 0.5_1	I215L	13.8691	0.127574	8	OURT88/1	Virulent	2	8
8h C2 881 0.5_1	MGF100-1R	999	0	8	OURT88/1	Virulent	2	8
8h C2 881 0.5_1	MGF360-10L	12.8523	1.17133	8	OURT88/1	Virulent	2	1
8h C2 881 0.5_1	MGF360-1L	15.8734	0.202995	8	OURT88/1	Virulent	2	8
8h C2 881 0.5_1	MGF505-10R	14.6479	0.244243	8	OURT88/1	Virulent	2	8
8h C2 881 0.5_1	MGF505-9R	14.7515	0.147334	8	OURT88/1	Virulent	2	8
8h C2 881 0.5_1	285L	14.0974	0.320622	8	OURT88/1	Virulent	2	8
8h C2 881 0.5_1	C962R	12.9552	0.723279	8	OURT88/1	Virulent	2	3
8h C2 881 0.5_1	E184L	10.1601	0.689267	8	OURT88/1	Virulent	2	3
8h C2 881 0.5_1	G-ACD-00600	15.4488	0.0432004	8	OURT88/1	Virulent	2
8h C2 881 0.5_1	I226R	12.479	0.77905	8	OURT88/1	Virulent	2	3
8h C2 881 0.5_1	MGF100-1L	10.6124	0	8	OURT88/1	Virulent	2	6
8h C2 881 0.5_1	MGF360-11L	14.0019	1.00655	8	OURT88/1	Virulent	2	1
8h C2 881 0.5_1	MGF360-21R	999	0	8	OURT88/1	Virulent	2	5
8h C2 881 0.5_1	MGF505-11L	13.9264	0.365698	8	OURT88/1	Virulent	2	8
8h C2 881 0.5_1	O61R	13.8903	0.0338622	8	OURT88/1	Virulent	2	7
8h C2 881 0.5_1	I267L	13.5988	1.06966	8	OURT88/1	Virulent	2	3
8h C2 881 0.5_1	E199L	19.5649	0.0542484	8	OURT88/1	Virulent	2	7
8h C2 881 0.5_1	CP312R	10.1071	0.354288	8	OURT88/1	Virulent	2	8
8h C2 881 0.5_1	B354L	11.8232	0.266039	8	OURT88/1	Virulent	2	8
8h C2 881 0.5_1	A104R	11.9654	0.147265	8	OURT88/1	Virulent	2	7
8h C2 881 0.5_1	CP204L	9.65136	0.213771	8	OURT88/1	Virulent	2	8
8h C2 881 0.5_1	MGF505-1R	14.6394	0.601808	8	OURT88/1	Virulent	2	2
8h C2 881 0.5_1	MGF360-12L	13.8995	0.8216	8	OURT88/1	Virulent	2	5
8h C2 881 0.5_1	MGF100-3L	12.7286	0.43288	8	OURT88/1	Virulent	2	8
8h C2 881 0.5_1	I329L	14.7593	0.176122	8	OURT88/1	Virulent	2	8
8h C2 881 0.5_1	H171R	13.8488	0.471298	8	OURT88/1	Virulent	2	3
8h C2 881 0.5_1	E248R	18.7314	0.036554	8	OURT88/1	Virulent	2	7
8h C2 881 0.5_1	CP80R	13.4913	0.282063	8	OURT88/1	Virulent	2	8
8h C2 881 0.5_1	B385R	16.7387	0.127705	8	OURT88/1	Virulent	2	7
8h C2 881 0.5_1	A137R	9.78814	1.15952	8	OURT88/1	Virulent	2	3
8h C2 881 0.5_1	B646L	15.8507	0.0117923	8	OURT88/1	Virulent	2	7
8h C2 881 0.5_1	MGF505-2R	16.7151	0.60835	8	OURT88/1	Virulent	2	1
8h C2 881 0.5_1	MGF360-2L	13.7612	0.170555	8	OURT88/1	Virulent	2	8
8h C2 881 0.5_1	MGF360-13L	15.9264	0.622997	8	OURT88/1	Virulent	2	2
8h C2 881 0.5_1	MGF110-2L	22.8455	0.000592622	8	OURT88/1	Virulent	2	8
8h C2 881 0.5_1	I8L	13.3256	0.549578	8	OURT88/1	Virulent	2	8
8h C2 881 0.5_1	H233R	11.8225	0.458993	8	OURT88/1	Virulent	2	3
8h C2 881 0.5_1	E301R	16.0517	0.519614	8	OURT88/1	Virulent	2	8
8h C2 881 0.5_1	B407L	12.5922	0.367018	8	OURT88/1	Virulent	2	8
8h C2 881 0.5_1	A151R	10.1205	0.428815	8	OURT88/1	Virulent	2	8
8h C2 881 0.5_1	MGF505-7R	15.215	0.15856	8	OURT88/1	Virulent	2	8
8h C2 881 0.5_1	QP383R	15.8593	0.849306	8	OURT88/1	Virulent	2	3
8h C2 881 0.5_1	MGF505-3R	13.3432	1.39943	8	OURT88/1	Virulent	2
8h C2 881 0.5_1	MGF360-3L	13.3196	0.221132	8	OURT88/1	Virulent	2	8
8h C2 881 0.5_1	K205R	10.5337	0.690766	8	OURT88/1	Virulent	2	8
8h C2 881 0.5_1	H240R	11.7602	0.501804	8	OURT88/1	Virulent	2	3
8h C2 881 0.5_1	DP238L	12.0828	0.406145	8	OURT88/1	Virulent	2	8
8h C2 881 0.5_1	B475L	12.3702	0.378091	8	OURT88/1	Virulent	2	8
8h C2 881 0.5_1	A224L	11.8352	0.256072	8	OURT88/1	Virulent	2	8
8h C2 881 0.5_1	R298L	14.0699	0.639926	8	OURT88/1	Virulent	2	3
8h C2 881 0.5_1	MGF505-4R	15.9919	0.192746	8	OURT88/1	Virulent	2	8
8h C2 881 0.5_1	MGF360-4L	15.8933	0.163421	8	OURT88/1	Virulent	2	8
8h C2 881 0.5_1	MGF360-14L	14.7003	2.36711	8	OURT88/1	Virulent	2	2
8h C2 881 0.5_1	MGF110-4L	999	0	8	OURT88/1	Virulent	2	8
8h C3 Geo 1.5_1	A238L	16.0652	0.432229	8	Georgia 2007/1	Virulent	3	8
8h C3 Geo 1.5_1	B119L	13.4713	0.576201	8	Georgia 2007/1	Virulent	3	7
8h C3 Geo 1.5_1	C129R	11.6057	1.59365	8	Georgia 2007/1	Virulent	3	8
8h C3 Geo 1.5_1	DP96R	12.4613	0.592865	8	Georgia 2007/1	Virulent	3	8
8h C3 Geo 1.5_1	EP364R	13.5634	1.59552	8	Georgia 2007/1	Virulent	3	8
8h C3 Geo 1.5_1	H359L	13.5793	2.07361	8	Georgia 2007/1	Virulent	3	8
8h C3 Geo 1.5_1	K78R	10.7296	0.556041	8	Georgia 2007/1	Virulent	3	7
8h C3 Geo 1.5_1	MGF110-7L	10.9381	4.30173	8	Georgia 2007/1	Virulent	3	4
8h C3 Geo 1.5_1	MGF360-15R	12.4367	0.59162	8	Georgia 2007/1	Virulent	3	8
8h C3 Geo 1.5_1	MGF360-8L	14.3249	1.59174	8	Georgia 2007/1	Virulent	3	8
8h C3 Geo 1.5_1	MGF505-5R	15.598	0.658803	8	Georgia 2007/1	Virulent	3	8
8h C3 Geo 1.5_1	A179L	12.3476	1.01148	8	Georgia 2007/1	Virulent	3	8
8h C3 Geo 1.5_1	B125R	13.4065	1.37236	8	Georgia 2007/1	Virulent	3	7
8h C3 Geo 1.5_1	C315R	13.1141	2.28891	8	Georgia 2007/1	Virulent	3	8
8h C3 Geo 1.5_1	E111R	11.5581	1.34109	8	Georgia 2007/1	Virulent	3	7
8h C3 Geo 1.5_1	EP424R	13.4232	0.655875	8	Georgia 2007/1	Virulent	3	8
8h C3 Geo 1.5_1	I196L	13.3673	0.873194	8	Georgia 2007/1	Virulent	3	7
8h C3 Geo 1.5_1	L60L	13.9892	0.249787	8	Georgia 2007/1	Virulent	3	8
8h C3 Geo 1.5_1	MGF300-2R	14.8279	0.83261	8	Georgia 2007/1	Virulent	3	8
8h C3 Geo 1.5_1	MGF360-16R	13.0356	0.975114	8	Georgia 2007/1	Virulent	3	8
8h C3 Geo 1.5_1	MGF360-9L	13.3318	2.33267	8	Georgia 2007/1	Virulent	3	8
8h C3 Geo 1.5_1	S183L	16.7185	0.64842	8	Georgia 2007/1	Virulent	3	7
8h C3 Geo 1.5_1	L83L	14.4549	0.145899	8	Georgia 2007/1	Virulent	3	8
8h C3 Geo 1.5_1	B263R	24.8511	0.605359	8	Georgia 2007/1	Virulent	3	5
8h C3 Geo 1.5_1	C475L	13.8734	1.55309	8	Georgia 2007/1	Virulent	3	8
8h C3 Geo 1.5_1	E146L	15.0897	1.17056	8	Georgia 2007/1	Virulent	3	8
8h C3 Geo 1.5_1	F165R	12.8129	1.40964	8	Georgia 2007/1	Virulent	3	7
8h C3 Geo 1.5_1	I215L	13.788	0.47748	8	Georgia 2007/1	Virulent	3	8
8h C3 Geo 1.5_1	MGF100-1R	14.2602	1.31165	8	Georgia 2007/1	Virulent	3	8
8h C3 Geo 1.5_1	MGF360-10L	12.2412	6.33019	8	Georgia 2007/1	Virulent	3	1
8h C3 Geo 1.5_1	MGF360-1L	14.7392	1.57645	8	Georgia 2007/1	Virulent	3	8
8h C3 Geo 1.5_1	MGF505-10R	14.8785	0.736496	8	Georgia 2007/1	Virulent	3	8
8h C3 Geo 1.5_1	MGF505-9R	14.4537	0.640805	8	Georgia 2007/1	Virulent	3	8
8h C3 Geo 1.5_1	285L	13.7309	1.46247	8	Georgia 2007/1	Virulent	3	8
8h C3 Geo 1.5_1	C962R	11.561	6.72622	8	Georgia 2007/1	Virulent	3	3
8h C3 Geo 1.5_1	E184L	8.71124	6.65744	8	Georgia 2007/1	Virulent	3	3
8h C3 Geo 1.5_1	G-ACD-00600	11.1587	2.99025	8	Georgia 2007/1	Virulent	3
8h C3 Geo 1.5_1	I226R	11.6497	4.89764	8	Georgia 2007/1	Virulent	3	3
8h C3 Geo 1.5_1	MGF100-1L	11.4678	0.665054	8	Georgia 2007/1	Virulent	3	6
8h C3 Geo 1.5_1	MGF360-11L	13.5581	4.84416	8	Georgia 2007/1	Virulent	3	1
8h C3 Geo 1.5_1	MGF360-21R	14.2858	4.92774	8	Georgia 2007/1	Virulent	3	5
8h C3 Geo 1.5_1	MGF505-11L	14.472	0.88648	8	Georgia 2007/1	Virulent	3	8
8h C3 Geo 1.5_1	O61R	11.8238	0.501858	8	Georgia 2007/1	Virulent	3	7
8h C3 Geo 1.5_1	I267L	13.7942	3.30513	8	Georgia 2007/1	Virulent	3	3
8h C3 Geo 1.5_1	E199L	17.7607	0.670306	8	Georgia 2007/1	Virulent	3	7
8h C3 Geo 1.5_1	CP312R	10.7682	0.79271	8	Georgia 2007/1	Virulent	3	8
8h C3 Geo 1.5_1	B354L	10.199	2.90164	8	Georgia 2007/1	Virulent	3	8
8h C3 Geo 1.5_1	A104R	21.4225	0.000741324	8	Georgia 2007/1	Virulent	3	7
8h C3 Geo 1.5_1	CP204L	10.3407	0.469042	8	Georgia 2007/1	Virulent	3	8
8h C3 Geo 1.5_1	MGF505-1R	14.2262	2.83543	8	Georgia 2007/1	Virulent	3	2
8h C3 Geo 1.5_1	MGF360-12L	14.8886	1.46456	8	Georgia 2007/1	Virulent	3	5
8h C3 Geo 1.5_1	MGF100-3L	14.9555	0.327179	8	Georgia 2007/1	Virulent	3	8
8h C3 Geo 1.5_1	I329L	14.0777	0.999508	8	Georgia 2007/1	Virulent	3	8
8h C3 Geo 1.5_1	H171R	12.7573	3.55333	8	Georgia 2007/1	Virulent	3	3
8h C3 Geo 1.5_1	E248R	16.1876	0.754156	8	Georgia 2007/1	Virulent	3	7
8h C3 Geo 1.5_1	CP80R	12.8136	1.59643	8	Georgia 2007/1	Virulent	3	8
8h C3 Geo 1.5_1	B385R	14.6902	1.86914	8	Georgia 2007/1	Virulent	3	7
8h C3 Geo 1.5_1	A137R	9.25876	5.92128	8	Georgia 2007/1	Virulent	3	3
8h C3 Geo 1.5_1	B646L	12.2125	0.519491	8	Georgia 2007/1	Virulent	3	7
8h C3 Geo 1.5_1	MGF505-2R	15.5656	4.77485	8	Georgia 2007/1	Virulent	3	1
8h C3 Geo 1.5_1	MGF360-2L	13.5652	0.691265	8	Georgia 2007/1	Virulent	3	8
8h C3 Geo 1.5_1	MGF360-13L	15.2042	3.63632	8	Georgia 2007/1	Virulent	3	2
8h C3 Geo 1.5_1	MGF110-2L	15.2263	0.412253	8	Georgia 2007/1	Virulent	3	8
8h C3 Geo 1.5_1	I8L	13.8299	1.37094	8	Georgia 2007/1	Virulent	3	8
8h C3 Geo 1.5_1	H233R	9.95275	5.93503	8	Georgia 2007/1	Virulent	3	3
8h C3 Geo 1.5_1	E301R	15.9618	1.95668	8	Georgia 2007/1	Virulent	3	8
8h C3 Geo 1.5_1	B407L	11.3887	2.99051	8	Georgia 2007/1	Virulent	3	8
8h C3 Geo 1.5_1	A151R	10.8139	0.938265	8	Georgia 2007/1	Virulent	3	8
8h C3 Geo 1.5_1	MGF505-7R	15.4795	0.467009	8	Georgia 2007/1	Virulent	3	8
8h C3 Geo 1.5_1	QP383R	16.3866	2.08502	8	Georgia 2007/1	Virulent	3	3
8h C3 Geo 1.5_1	MGF505-3R	15.543	1.07772	8	Georgia 2007/1	Virulent	3
8h C3 Geo 1.5_1	MGF360-3L	12.4162	1.46343	8	Georgia 2007/1	Virulent	3	8
8h C3 Geo 1.5_1	K205R	10.0065	3.52215	8	Georgia 2007/1	Virulent	3	8
8h C3 Geo 1.5_1	H240R	10.2937	4.90666	8	Georgia 2007/1	Virulent	3	3
8h C3 Geo 1.5_1	DP238L	12.179	1.34434	8	Georgia 2007/1	Virulent	3	8
8h C3 Geo 1.5_1	B475L	11.4825	2.47522	8	Georgia 2007/1	Virulent	3	8
8h C3 Geo 1.5_1	A224L	11.712	0.98679	8	Georgia 2007/1	Virulent	3	8
8h C3 Geo 1.5_1	R298L	12.4554	6.93316	8	Georgia 2007/1	Virulent	3	3
8h C3 Geo 1.5_1	MGF505-4R	16.0334	0.662616	8	Georgia 2007/1	Virulent	3	8
8h C3 Geo 1.5_1	MGF360-4L	13.7051	2.63505	8	Georgia 2007/1	Virulent	3	8
8h C3 Geo 1.5_1	MGF360-14L	23.0619	0.0254624	8	Georgia 2007/1	Virulent	3	2
8h C3 Geo 1.5_1	MGF110-4L	10.7951	1.01758	8	Georgia 2007/1	Virulent	3	8
48h C3 881 1.5_1	A238L	13.3414	6.12904	48	OURT88/1	Virulent	3	8
48h C3 881 1.5_1	B119L	12.3062	2.77344	48	OURT88/1	Virulent	3	7
48h C3 881 1.5_1	C129R	11.1374	4.73273	48	OURT88/1	Virulent	3	8
48h C3 881 1.5_1	DP96R	9.91466	7.43578	48	OURT88/1	Virulent	3	8
48h C3 881 1.5_1	EP364R	13.0975	4.7302	48	OURT88/1	Virulent	3	8
48h C3 881 1.5_1	H359L	13.6309	4.29462	48	OURT88/1	Virulent	3	8
48h C3 881 1.5_1	K78R	8.57375	5.31902	48	OURT88/1	Virulent	3	7
48h C3 881 1.5_1	MGF110-7L	999	0	48	OURT88/1	Virulent	3	4
48h C3 881 1.5_1	MGF360-15R	9.86687	7.54007	48	OURT88/1	Virulent	3	8
48h C3 881 1.5_1	MGF360-8L	13.6299	5.53128	48	OURT88/1	Virulent	3	8
48h C3 881 1.5_1	MGF505-5R	13.3901	6.53348	48	OURT88/1	Virulent	3	8
48h C3 881 1.5_1	A179L	11.1573	4.95457	48	OURT88/1	Virulent	3	8
48h C3 881 1.5_1	B125R	12.3082	6.30678	48	OURT88/1	Virulent	3	7
48h C3 881 1.5_1	C315R	13.2801	4.37933	48	OURT88/1	Virulent	3	8
48h C3 881 1.5_1	E111R	11.14	3.84643	48	OURT88/1	Virulent	3	7
48h C3 881 1.5_1	EP424R	11.7196	4.58559	48	OURT88/1	Virulent	3	8
48h C3 881 1.5_1	I196L	11.6817	6.02917	48	OURT88/1	Virulent	3	7
48h C3 881 1.5_1	L60L	11.1943	3.72076	48	OURT88/1	Virulent	3	8
48h C3 881 1.5_1	MGF300-2R	13.219	5.45145	48	OURT88/1	Virulent	3	8
48h C3 881 1.5_1	MGF360-16R	11.2678	7.12775	48	OURT88/1	Virulent	3	8
48h C3 881 1.5_1	MGF360-9L	13.3689	4.87995	48	OURT88/1	Virulent	3	8
48h C3 881 1.5_1	S183L	14.7408	5.48205	48	OURT88/1	Virulent	3	7
48h C3 881 1.5_1	L83L	10.6505	4.37577	48	OURT88/1	Virulent	3	8
48h C3 881 1.5_1	B263R	22.2448	7.91267	48	OURT88/1	Virulent	3	5
48h C3 881 1.5_1	C475L	13.2058	5.29533	48	OURT88/1	Virulent	3	8
48h C3 881 1.5_1	E146L	14.5356	3.68925	48	OURT88/1	Virulent	3	8
48h C3 881 1.5_1	F165R	12.1376	4.83195	48	OURT88/1	Virulent	3	7
48h C3 881 1.5_1	I215L	11.9762	3.59831	48	OURT88/1	Virulent	3	8
48h C3 881 1.5_1	MGF100-1R	999	0	48	OURT88/1	Virulent	3	8
48h C3 881 1.5_1	MGF360-10L	12.4745	11.5598	48	OURT88/1	Virulent	3	1
48h C3 881 1.5_1	MGF360-1L	14.5505	3.85696	48	OURT88/1	Virulent	3	8
48h C3 881 1.5_1	MGF505-10R	13.0726	5.52783	48	OURT88/1	Virulent	3	8
48h C3 881 1.5_1	MGF505-9R	12.799	4.33106	48	OURT88/1	Virulent	3	8
48h C3 881 1.5_1	285L	12.5273	7.23003	48	OURT88/1	Virulent	3	8
48h C3 881 1.5_1	C962R	13.8284	2.99899	48	OURT88/1	Virulent	3	3
48h C3 881 1.5_1	E184L	10.7286	3.52985	48	OURT88/1	Virulent	3	3
48h C3 881 1.5_1	G-ACD-00600	14.7053	0.549304	48	OURT88/1	Virulent	3
48h C3 881 1.5_1	I226R	13.178	3.6447	48	OURT88/1	Virulent	3	3
48h C3 881 1.5_1	MGF100-1L	9.4509	0	48	OURT88/1	Virulent	3	6
48h C3 881 1.5_1	MGF360-11L	13.4688	11.0617	48	OURT88/1	Virulent	3	1
48h C3 881 1.5_1	MGF360-21R	999	0	48	OURT88/1	Virulent	3	5
48h C3 881 1.5_1	MGF505-11L	12.7845	6.12909	48	OURT88/1	Virulent	3	8
48h C3 881 1.5_1	O61R	9.53038	5.28076	48	OURT88/1	Virulent	3	7
48h C3 881 1.5_1	I267L	14.2425	5.19961	48	OURT88/1	Virulent	3	3
48h C3 881 1.5_1	E199L	16.6849	3.03294	48	OURT88/1	Virulent	3	7
48h C3 881 1.5_1	CP312R	8.80242	6.6469	48	OURT88/1	Virulent	3	8
48h C3 881 1.5_1	B354L	10.9221	3.7732	48	OURT88/1	Virulent	3	8
48h C3 881 1.5_1	A104R	9.19138	7.65016	48	OURT88/1	Virulent	3	7
48h C3 881 1.5_1	CP204L	7.61172	6.67512	48	OURT88/1	Virulent	3	8
48h C3 881 1.5_1	MGF505-1R	13.529	9.86815	48	OURT88/1	Virulent	3	2
48h C3 881 1.5_1	MGF360-12L	13.2842	9.55926	48	OURT88/1	Virulent	3	5
48h C3 881 1.5_1	MGF100-3L	11.2984	8.85982	48	OURT88/1	Virulent	3	8
48h C3 881 1.5_1	I329L	13.2176	3.8943	48	OURT88/1	Virulent	3	8
48h C3 881 1.5_1	H171R	13.7411	3.85689	48	OURT88/1	Virulent	3	3
48h C3 881 1.5_1	E248R	14.577	4.94357	48	OURT88/1	Virulent	3	7
48h C3 881 1.5_1	CP80R	12.3839	4.61574	48	OURT88/1	Virulent	3	8
48h C3 881 1.5_1	B385R	14.7947	3.73189	48	OURT88/1	Virulent	3	7
48h C3 881 1.5_1	A137R	10.3979	5.77102	48	OURT88/1	Virulent	3	3
48h C3 881 1.5_1	B646L	10.4214	3.85917	48	OURT88/1	Virulent	3	7
48h C3 881 1.5_1	MGF505-2R	15.0664	14.487	48	OURT88/1	Virulent	3	1
48h C3 881 1.5_1	MGF360-2L	12.0827	4.14626	48	OURT88/1	Virulent	3	8
48h C3 881 1.5_1	MGF360-13L	14.9117	9.56	48	OURT88/1	Virulent	3	2
48h C3 881 1.5_1	MGF110-2L	23.1162	0.00373092	48	OURT88/1	Virulent	3	8
48h C3 881 1.5_1	I8L	12.8391	5.84798	48	OURT88/1	Virulent	3	8
48h C3 881 1.5_1	H233R	11.8212	3.48898	48	OURT88/1	Virulent	3	3
48h C3 881 1.5_1	E301R	16.713	2.49534	48	OURT88/1	Virulent	3	8
48h C3 881 1.5_1	B407L	11.8286	4.73239	48	OURT88/1	Virulent	3	8
48h C3 881 1.5_1	A151R	9.3867	5.41607	48	OURT88/1	Virulent	3	8
48h C3 881 1.5_1	MGF505-7R	12.5951	7.4023	48	OURT88/1	Virulent	3	8
48h C3 881 1.5_1	QP383R	16.6943	3.61594	48	OURT88/1	Virulent	3	3
48h C3 881 1.5_1	MGF505-3R	12.8169	15.3067	48	OURT88/1	Virulent	3
48h C3 881 1.5_1	MGF360-3L	11.7613	4.94599	48	OURT88/1	Virulent	3	8
48h C3 881 1.5_1	K205R	10.2407	6.42729	48	OURT88/1	Virulent	3	8
48h C3 881 1.5_1	H240R	11.6676	4.06388	48	OURT88/1	Virulent	3	3
48h C3 881 1.5_1	DP238L	11.3761	5.03452	48	OURT88/1	Virulent	3	8
48h C3 881 1.5_1	B475L	11.5134	5.2006	48	OURT88/1	Virulent	3	8
48h C3 881 1.5_1	A224L	10.4122	5.21476	48	OURT88/1	Virulent	3	8
48h C3 881 1.5_1	R298L	14.6314	3.29332	48	OURT88/1	Virulent	3	3
48h C3 881 1.5_1	MGF505-4R	13.922	6.14592	48	OURT88/1	Virulent	3	8
48h C3 881 1.5_1	MGF360-4L	13.6295	5.96068	48	OURT88/1	Virulent	3	8
48h C3 881 1.5_1	MGF360-14L	13.6357	37.6023	48	OURT88/1	Virulent	3	2
48h C3 881 1.5_1	MGF110-4L	999	0	48	OURT88/1	Virulent	3	8
4h C1 883 0.5_1	A238L	18.9743	0.0227824	4	OURT88/3	Attenuated	1	8
4h C1 883 0.5_1	B119L	23.1273	0.000282777	4	OURT88/3	Attenuated	1	7
4h C1 883 0.5_1	C129R	19.2375	0.00318142	4	OURT88/3	Attenuated	1	8
4h C1 883 0.5_1	DP96R	14.7696	0.0473938	4	OURT88/3	Attenuated	1	8
4h C1 883 0.5_1	EP364R	999	0	4	OURT88/3	Attenuated	1	8
4h C1 883 0.5_1	H359L	19.6264	0.0124159	4	OURT88/3	Attenuated	1	8
4h C1 883 0.5_1	K78R	22.4678	6.44437e-05	4	OURT88/3	Attenuated	1	7
4h C1 883 0.5_1	MGF110-7L	999	0	4	OURT88/3	Attenuated	1	4
4h C1 883 0.5_1	MGF360-15R	14.6652	0.0499814	4	OURT88/3	Attenuated	1	8
4h C1 883 0.5_1	MGF360-8L	20.5485	0.00843302	4	OURT88/3	Attenuated	1	8
4h C1 883 0.5_1	MGF505-5R	18.5481	0.0337526	4	OURT88/3	Attenuated	1	8
4h C1 883 0.5_1	A179L	14.6887	0.0790374	4	OURT88/3	Attenuated	1	8
4h C1 883 0.5_1	B125R	999	0	4	OURT88/3	Attenuated	1	7
4h C1 883 0.5_1	C315R	17.9669	0.0313629	4	OURT88/3	Attenuated	1	8
4h C1 883 0.5_1	E111R	18.8652	0.00335311	4	OURT88/3	Attenuated	1	7
4h C1 883 0.5_1	EP424R	20.7348	0.00163467	4	OURT88/3	Attenuated	1	8
4h C1 883 0.5_1	I196L	23.5765	0.000292039	4	OURT88/3	Attenuated	1	7
4h C1 883 0.5_1	L60L	21.0163	0.000758227	4	OURT88/3	Attenuated	1	8
4h C1 883 0.5_1	MGF300-2R	18.8565	0.0201985	4	OURT88/3	Attenuated	1	8
4h C1 883 0.5_1	MGF360-16R	14.8303	0.111282	4	OURT88/3	Attenuated	1	8
4h C1 883 0.5_1	MGF360-9L	999	0	4	OURT88/3	Attenuated	1	8
4h C1 883 0.5_1	S183L	22.9733	0.00336209	4	OURT88/3	Attenuated	1	7
4h C1 883 0.5_1	L83L	18.5852	0.00329864	4	OURT88/3	Attenuated	1	8
4h C1 883 0.5_1	B263R	22.3978	1.31271	4	OURT88/3	Attenuated	1	5
4h C1 883 0.5_1	C475L	21.7418	0.00263148	4	OURT88/3	Attenuated	1	8
4h C1 883 0.5_1	E146L	999	0	4	OURT88/3	Attenuated	1	8
4h C1 883 0.5_1	F165R	999	0	4	OURT88/3	Attenuated	1	7
4h C1 883 0.5_1	I215L	13.5458	0.223599	4	OURT88/3	Attenuated	1	8
4h C1 883 0.5_1	MGF100-1R	18.7155	0.0236748	4	OURT88/3	Attenuated	1	8
4h C1 883 0.5_1	MGF360-10L	999	0	4	OURT88/3	Attenuated	1	1
4h C1 883 0.5_1	MGF360-1L	20.8467	0.00905228	4	OURT88/3	Attenuated	1	8
4h C1 883 0.5_1	MGF505-10R	16.8115	0.0763685	4	OURT88/3	Attenuated	1	8
4h C1 883 0.5_1	MGF505-9R	15.7949	0.100142	4	OURT88/3	Attenuated	1	8
4h C1 883 0.5_1	285L	18.2181	0.0258179	4	OURT88/3	Attenuated	1	8
4h C1 883 0.5_1	C962R	22.9542	0.000990167	4	OURT88/3	Attenuated	1	3
4h C1 883 0.5_1	E184L	999	0	4	OURT88/3	Attenuated	1	3
4h C1 883 0.5_1	G-ACD-00600	18.9569	0.00531914	4	OURT88/3	Attenuated	1
4h C1 883 0.5_1	I226R	23.3359	0.000588422	4	OURT88/3	Attenuated	1	3
4h C1 883 0.5_1	MGF100-1L	12.4183	0	4	OURT88/3	Attenuated	1	6
4h C1 883 0.5_1	MGF360-11L	23.1864	0.00242343	4	OURT88/3	Attenuated	1	1
4h C1 883 0.5_1	MGF360-21R	999	0	4	OURT88/3	Attenuated	1	5
4h C1 883 0.5_1	MGF505-11L	17.5254	0.0422769	4	OURT88/3	Attenuated	1	8
4h C1 883 0.5_1	O61R	21.4105	0.000258401	4	OURT88/3	Attenuated	1	7
4h C1 883 0.5_1	I267L	18.7834	0.0412025	4	OURT88/3	Attenuated	1	3
4h C1 883 0.5_1	E199L	26.883	0.000476244	4	OURT88/3	Attenuated	1	7
4h C1 883 0.5_1	CP312R	14.8558	0.0184609	4	OURT88/3	Attenuated	1	8
4h C1 883 0.5_1	B354L	999	0	4	OURT88/3	Attenuated	1	8
4h C1 883 0.5_1	A104R	16.6042	0.00828099	4	OURT88/3	Attenuated	1	7
4h C1 883 0.5_1	CP204L	12.7703	0.0344708	4	OURT88/3	Attenuated	1	8
4h C1 883 0.5_1	MGF505-1R	999	0	4	OURT88/3	Attenuated	1	2
4h C1 883 0.5_1	MGF360-12L	20.5288	0.0116265	4	OURT88/3	Attenuated	1	5
4h C1 883 0.5_1	MGF100-3L	17.0235	0.0308945	4	OURT88/3	Attenuated	1	8
4h C1 883 0.5_1	I329L	18.2852	0.0214191	4	OURT88/3	Attenuated	1	8
4h C1 883 0.5_1	H171R	999	0	4	OURT88/3	Attenuated	1	3
4h C1 883 0.5_1	E248R	23.2507	0.00223306	4	OURT88/3	Attenuated	1	7
4h C1 883 0.5_1	CP80R	19.1868	0.00762485	4	OURT88/3	Attenuated	1	8
4h C1 883 0.5_1	B385R	999	0	4	OURT88/3	Attenuated	1	7
4h C1 883 0.5_1	A137R	999	0	4	OURT88/3	Attenuated	1	3
4h C1 883 0.5_1	B646L	999	0	4	OURT88/3	Attenuated	1	7
4h C1 883 0.5_1	MGF505-2R	999	0	4	OURT88/3	Attenuated	1	1
4h C1 883 0.5_1	MGF360-2L	999	0	4	OURT88/3	Attenuated	1	8
4h C1 883 0.5_1	MGF360-13L	999	0	4	OURT88/3	Attenuated	1	2
4h C1 883 0.5_1	MGF110-2L	16.5258	0.0663139	4	OURT88/3	Attenuated	1	8
4h C1 883 0.5_1	I8L	18.0417	0.029293	4	OURT88/3	Attenuated	1	8
4h C1 883 0.5_1	H233R	999	0	4	OURT88/3	Attenuated	1	3
4h C1 883 0.5_1	E301R	999	0	4	OURT88/3	Attenuated	1	8
4h C1 883 0.5_1	B407L	999	0	4	OURT88/3	Attenuated	1	8
4h C1 883 0.5_1	A151R	14.41	0.0307188	4	OURT88/3	Attenuated	1	8
4h C1 883 0.5_1	MGF505-7R	15.7323	0.155185	4	OURT88/3	Attenuated	1	8
4h C1 883 0.5_1	QP383R	999	0	4	OURT88/3	Attenuated	1	3
4h C1 883 0.5_1	MGF505-3R	999	0	4	OURT88/3	Attenuated	1
4h C1 883 0.5_1	MGF360-3L	19.2574	0.00505354	4	OURT88/3	Attenuated	1	8
4h C1 883 0.5_1	K205R	14.6719	0.0549533	4	OURT88/3	Attenuated	1	8
4h C1 883 0.5_1	H240R	999	0	4	OURT88/3	Attenuated	1	3
4h C1 883 0.5_1	DP238L	15.109	0.0698411	4	OURT88/3	Attenuated	1	8
4h C1 883 0.5_1	B475L	999	0	4	OURT88/3	Attenuated	1	8
4h C1 883 0.5_1	A224L	14.4301	0.0593761	4	OURT88/3	Attenuated	1	8
4h C1 883 0.5_1	R298L	999	0	4	OURT88/3	Attenuated	1	3
4h C1 883 0.5_1	MGF505-4R	22.0936	0.00393171	4	OURT88/3	Attenuated	1	8
4h C1 883 0.5_1	MGF360-4L	21.8833	0.00360195	4	OURT88/3	Attenuated	1	8
4h C1 883 0.5_1	MGF360-14L	999	0	4	OURT88/3	Attenuated	1	2
4h C1 883 0.5_1	MGF110-4L	10.8939	0.376219	4	OURT88/3	Attenuated	1	8
48h C2 L60 0.5_1	A238L	13.9181	8.49334	48	L60	Virulent	2	8
48h C2 L60 0.5_1	B119L	13.9038	1.89408	48	L60	Virulent	2	7
48h C2 L60 0.5_1	C129R	12.715	3.27724	48	L60	Virulent	2	8
48h C2 L60 0.5_1	DP96R	10.9637	7.42704	48	L60	Virulent	2	8
48h C2 L60 0.5_1	EP364R	14.3286	4.16453	48	L60	Virulent	2	8
48h C2 L60 0.5_1	H359L	14.7149	4.18673	48	L60	Virulent	2	8
48h C2 L60 0.5_1	K78R	10.099	3.81926	48	L60	Virulent	2	7
48h C2 L60 0.5_1	MGF110-7L	999	0	48	L60	Virulent	2	4
48h C2 L60 0.5_1	MGF360-15R	10.89	7.66771	48	L60	Virulent	2	8
48h C2 L60 0.5_1	MGF360-8L	13.949	9.16318	48	L60	Virulent	2	8
48h C2 L60 0.5_1	MGF505-5R	14.4416	6.51477	48	L60	Virulent	2	8
48h C2 L60 0.5_1	A179L	11.9791	5.79311	48	L60	Virulent	2	8
48h C2 L60 0.5_1	B125R	13.4645	5.84832	48	L60	Virulent	2	7
48h C2 L60 0.5_1	C315R	13.9894	5.53556	48	L60	Virulent	2	8
48h C2 L60 0.5_1	E111R	12.4341	3.2419	48	L60	Virulent	2	7
48h C2 L60 0.5_1	EP424R	12.7497	4.64083	48	L60	Virulent	2	8
48h C2 L60 0.5_1	I196L	12.1251	9.16344	48	L60	Virulent	2	7
48h C2 L60 0.5_1	L60L	12.7639	2.59078	48	L60	Virulent	2	8
48h C2 L60 0.5_1	MGF300-2R	13.1378	11.9189	48	L60	Virulent	2	8
48h C2 L60 0.5_1	MGF360-16R	11.7619	10.4591	48	L60	Virulent	2	8
48h C2 L60 0.5_1	MGF360-9L	13.9547	6.71979	48	L60	Virulent	2	8
48h C2 L60 0.5_1	S183L	16.1744	4.19438	48	L60	Virulent	2	7
48h C2 L60 0.5_1	L83L	11.5883	4.72072	48	L60	Virulent	2	8
48h C2 L60 0.5_1	B263R	21.2798	31.9242	48	L60	Virulent	2	5
48h C2 L60 0.5_1	C475L	14.6075	4.14218	48	L60	Virulent	2	8
48h C2 L60 0.5_1	E146L	16.0287	2.7087	48	L60	Virulent	2	8
48h C2 L60 0.5_1	F165R	13.7748	3.2103	48	L60	Virulent	2	7
48h C2 L60 0.5_1	I215L	12.3169	5.87254	48	L60	Virulent	2	8
48h C2 L60 0.5_1	MGF100-1R	999	0	48	L60	Virulent	2	8
48h C2 L60 0.5_1	MGF360-10L	12.7924	19.1659	48	L60	Virulent	2	1
48h C2 L60 0.5_1	MGF360-1L	14.694	7.21662	48	L60	Virulent	2	8
48h C2 L60 0.5_1	MGF505-10R	14.1544	5.39725	48	L60	Virulent	2	8
48h C2 L60 0.5_1	MGF505-9R	13.5915	5.1677	48	L60	Virulent	2	8
48h C2 L60 0.5_1	285L	12.741	12.8854	48	L60	Virulent	2	8
48h C2 L60 0.5_1	C962R	15.9975	1.37807	48	L60	Virulent	2	3
48h C2 L60 0.5_1	E184L	11.3737	4.66515	48	L60	Virulent	2	3
48h C2 L60 0.5_1	G-ACD-00600	15.1936	0.809336	48	L60	Virulent	2
48h C2 L60 0.5_1	I226R	13.5741	5.72398	48	L60	Virulent	2	3
48h C2 L60 0.5_1	MGF100-1L	9.41498	0	48	L60	Virulent	2	6
48h C2 L60 0.5_1	MGF360-11L	15.0697	7.53676	48	L60	Virulent	2	1
48h C2 L60 0.5_1	MGF360-21R	999	0	48	L60	Virulent	2	5
48h C2 L60 0.5_1	MGF505-11L	13.5133	7.64316	48	L60	Virulent	2	8
48h C2 L60 0.5_1	O61R	11.2336	3.35155	48	L60	Virulent	2	7
48h C2 L60 0.5_1	I267L	14.8475	7.06569	48	L60	Virulent	2	3
48h C2 L60 0.5_1	E199L	17.5897	3.34796	48	L60	Virulent	2	7
48h C2 L60 0.5_1	CP312R	8.9008	12.8318	48	L60	Virulent	2	8
48h C2 L60 0.5_1	B354L	11.5179	5.16001	48	L60	Virulent	2	8
48h C2 L60 0.5_1	A104R	10.0222	8.88886	48	L60	Virulent	2	7
48h C2 L60 0.5_1	CP204L	7.8413	11.7661	48	L60	Virulent	2	8
48h C2 L60 0.5_1	MGF505-1R	14.0127	14.5859	48	L60	Virulent	2	2
48h C2 L60 0.5_1	MGF360-12L	13.6302	15.5437	48	L60	Virulent	2	5
48h C2 L60 0.5_1	MGF100-3L	11.4822	16.1211	48	L60	Virulent	2	8
48h C2 L60 0.5_1	I329L	14.0533	4.50951	48	L60	Virulent	2	8
48h C2 L60 0.5_1	H171R	14.5446	4.56709	48	L60	Virulent	2	3
48h C2 L60 0.5_1	E248R	15.5863	5.07596	48	L60	Virulent	2	7
48h C2 L60 0.5_1	CP80R	13.426	4.63238	48	L60	Virulent	2	8
48h C2 L60 0.5_1	B385R	16.3143	2.69011	48	L60	Virulent	2	7
48h C2 L60 0.5_1	A137R	11.8249	4.43571	48	L60	Virulent	2	3
48h C2 L60 0.5_1	B646L	12.0373	2.60223	48	L60	Virulent	2	7
48h C2 L60 0.5_1	MGF505-2R	16.0272	15.3827	48	L60	Virulent	2	1
48h C2 L60 0.5_1	MGF360-2L	12.4822	6.49684	48	L60	Virulent	2	8
48h C2 L60 0.5_1	MGF360-13L	15.0965	17.3832	48	L60	Virulent	2	2
48h C2 L60 0.5_1	MGF110-2L	22.8785	0.00909194	48	L60	Virulent	2	8
48h C2 L60 0.5_1	I8L	13.317	8.67789	48	L60	Virulent	2	8
48h C2 L60 0.5_1	H233R	13.5848	2.12364	48	L60	Virulent	2	3
48h C2 L60 0.5_1	E301R	18.3947	1.60765	48	L60	Virulent	2	8
48h C2 L60 0.5_1	B407L	12.8556	4.79957	48	L60	Virulent	2	8
48h C2 L60 0.5_1	A151R	10.0678	6.98147	48	L60	Virulent	2	8
48h C2 L60 0.5_1	MGF505-7R	13.0576	11.1027	48	L60	Virulent	2	8
48h C2 L60 0.5_1	QP383R	18.3464	2.37781	48	L60	Virulent	2	3
48h C2 L60 0.5_1	MGF505-3R	12.7513	33.1081	48	L60	Virulent	2
48h C2 L60 0.5_1	MGF360-3L	13.4223	3.23262	48	L60	Virulent	2	8
48h C2 L60 0.5_1	K205R	10.8188	8.89834	48	L60	Virulent	2	8
48h C2 L60 0.5_1	H240R	12.2104	5.7654	48	L60	Virulent	2	3
48h C2 L60 0.5_1	DP238L	11.6705	8.48406	48	L60	Virulent	2	8
48h C2 L60 0.5_1	B475L	12.1097	7.10912	48	L60	Virulent	2	8
48h C2 L60 0.5_1	A224L	10.9894	7.22385	48	L60	Virulent	2	8
48h C2 L60 0.5_1	R298L	16.0763	2.50006	48	L60	Virulent	2	3
48h C2 L60 0.5_1	MGF505-4R	14.5309	8.32898	48	L60	Virulent	2	8
48h C2 L60 0.5_1	MGF360-4L	14.6318	6.14954	48	L60	Virulent	2	8
48h C2 L60 0.5_1	MGF360-14L	14.0167	59.6766	48	L60	Virulent	2	2
48h C2 L60 0.5_1	MGF110-4L	999	0	48	L60	Virulent	2	8
4h C1 L60 1.5_1	A238L	17.304	0.0806152	4	L60	Virulent	1	8
4h C1 L60 1.5_1	B119L	22.1631	0.000613323	4	L60	Virulent	1	7
4h C1 L60 1.5_1	C129R	17.766	0.00980782	4	L60	Virulent	1	8
4h C1 L60 1.5_1	DP96R	12.8348	0.201448	4	L60	Virulent	1	8
4h C1 L60 1.5_1	EP364R	20.4295	0.00601997	4	L60	Virulent	1	8
4h C1 L60 1.5_1	H359L	18.5333	0.0294464	4	L60	Virulent	1	8
4h C1 L60 1.5_1	K78R	16.0909	0.00595393	4	L60	Virulent	1	7
4h C1 L60 1.5_1	MGF110-7L	999	0	4	L60	Virulent	1	4
4h C1 L60 1.5_1	MGF360-15R	12.8853	0.190816	4	L60	Virulent	1	8
4h C1 L60 1.5_1	MGF360-8L	18.3134	0.0441384	4	L60	Virulent	1	8
4h C1 L60 1.5_1	MGF505-5R	16.4107	0.165098	4	L60	Virulent	1	8
4h C1 L60 1.5_1	A179L	13.9114	0.150602	4	L60	Virulent	1	8
4h C1 L60 1.5_1	B125R	22.435	0.00115667	4	L60	Virulent	1	7
4h C1 L60 1.5_1	C315R	17.1314	0.0622174	4	L60	Virulent	1	8
4h C1 L60 1.5_1	E111R	17.0004	0.0135763	4	L60	Virulent	1	7
4h C1 L60 1.5_1	EP424R	18.0945	0.0113301	4	L60	Virulent	1	8
4h C1 L60 1.5_1	I196L	20.1685	0.00344633	4	L60	Virulent	1	7
4h C1 L60 1.5_1	L60L	19.0316	0.00333625	4	L60	Virulent	1	8
4h C1 L60 1.5_1	MGF300-2R	17.0265	0.0798396	4	L60	Virulent	1	8
4h C1 L60 1.5_1	MGF360-16R	12.8758	0.479482	4	L60	Virulent	1	8
4h C1 L60 1.5_1	MGF360-9L	17.1654	0.072019	4	L60	Virulent	1	8
4h C1 L60 1.5_1	S183L	999	0	4	L60	Virulent	1	7
4h C1 L60 1.5_1	L83L	15.8462	0.0244828	4	L60	Virulent	1	8
4h C1 L60 1.5_1	B263R	23.4974	0.681	4	L60	Virulent	1	5
4h C1 L60 1.5_1	C475L	20.3778	0.00752968	4	L60	Virulent	1	8
4h C1 L60 1.5_1	E146L	999	0	4	L60	Virulent	1	8
4h C1 L60 1.5_1	F165R	999	0	4	L60	Virulent	1	7
4h C1 L60 1.5_1	I215L	12.9589	0.373366	4	L60	Virulent	1	8
4h C1 L60 1.5_1	MGF100-1R	999	0	4	L60	Virulent	1	8
4h C1 L60 1.5_1	MGF360-10L	15.2545	0.345103	4	L60	Virulent	1	1
4h C1 L60 1.5_1	MGF360-1L	19.4461	0.026569	4	L60	Virulent	1	8
4h C1 L60 1.5_1	MGF505-10R	15.2589	0.249046	4	L60	Virulent	1	8
4h C1 L60 1.5_1	MGF505-9R	14.25	0.324834	4	L60	Virulent	1	8
4h C1 L60 1.5_1	285L	15.8236	0.150915	4	L60	Virulent	1	8
4h C1 L60 1.5_1	C962R	999	0	4	L60	Virulent	1	3
4h C1 L60 1.5_1	E184L	999	0	4	L60	Virulent	1	3
4h C1 L60 1.5_1	G-ACD-00600	16.6056	0.0301744	4	L60	Virulent	1
4h C1 L60 1.5_1	I226R	999	0	4	L60	Virulent	1	3
4h C1 L60 1.5_1	MGF100-1L	10.7973	0	4	L60	Virulent	1	6
4h C1 L60 1.5_1	MGF360-11L	16.346	0.30872	4	L60	Virulent	1	1
4h C1 L60 1.5_1	MGF360-21R	999	0	4	L60	Virulent	1	5
4h C1 L60 1.5_1	MGF505-11L	15.9565	0.139446	4	L60	Virulent	1	8
4h C1 L60 1.5_1	O61R	19.9465	0.000792494	4	L60	Virulent	1	7
4h C1 L60 1.5_1	I267L	16.8085	0.180054	4	L60	Virulent	1	3
4h C1 L60 1.5_1	E199L	22.3057	0.0126389	4	L60	Virulent	1	7
4h C1 L60 1.5_1	CP312R	12.7347	0.0892802	4	L60	Virulent	1	8
4h C1 L60 1.5_1	B354L	23.2178	0.000153894	4	L60	Virulent	1	8
4h C1 L60 1.5_1	A104R	13.983	0.0566401	4	L60	Virulent	1	7
4h C1 L60 1.5_1	CP204L	10.6633	0.165093	4	L60	Virulent	1	8
4h C1 L60 1.5_1	MGF505-1R	17.105	0.169681	4	L60	Virulent	1	2
4h C1 L60 1.5_1	MGF360-12L	15.5713	0.401598	4	L60	Virulent	1	5
4h C1 L60 1.5_1	MGF100-3L	14.6108	0.182881	4	L60	Virulent	1	8
4h C1 L60 1.5_1	I329L	15.9613	0.119226	4	L60	Virulent	1	8
4h C1 L60 1.5_1	H171R	999	0	4	L60	Virulent	1	3
4h C1 L60 1.5_1	E248R	22.1414	0.00535568	4	L60	Virulent	1	7
4h C1 L60 1.5_1	CP80R	18.197	0.0168339	4	L60	Virulent	1	8
4h C1 L60 1.5_1	B385R	999	0	4	L60	Virulent	1	7
4h C1 L60 1.5_1	A137R	22.6001	0.000251118	4	L60	Virulent	1	3
4h C1 L60 1.5_1	B646L	999	0	4	L60	Virulent	1	7
4h C1 L60 1.5_1	MGF505-2R	999	0	4	L60	Virulent	1	1
4h C1 L60 1.5_1	MGF360-2L	20.6271	0.00227737	4	L60	Virulent	1	8
4h C1 L60 1.5_1	MGF360-13L	18.633	0.148636	4	L60	Virulent	1	2
4h C1 L60 1.5_1	MGF110-2L	999	0	4	L60	Virulent	1	8
4h C1 L60 1.5_1	I8L	14.747	0.319557	4	L60	Virulent	1	8
4h C1 L60 1.5_1	H233R	999	0	4	L60	Virulent	1	3
4h C1 L60 1.5_1	E301R	999	0	4	L60	Virulent	1	8
4h C1 L60 1.5_1	B407L	999	0	4	L60	Virulent	1	8
4h C1 L60 1.5_1	A151R	12.641	0.116391	4	L60	Virulent	1	8
4h C1 L60 1.5_1	MGF505-7R	13.8331	0.643525	4	L60	Virulent	1	8
4h C1 L60 1.5_1	QP383R	999	0	4	L60	Virulent	1	3
4h C1 L60 1.5_1	MGF505-3R	13.9772	1.4044	4	L60	Virulent	1
4h C1 L60 1.5_1	MGF360-3L	17.3487	0.0210949	4	L60	Virulent	1	8
4h C1 L60 1.5_1	K205R	13.3719	0.150426	4	L60	Virulent	1	8
4h C1 L60 1.5_1	H240R	22.1141	0.000597146	4	L60	Virulent	1	3
4h C1 L60 1.5_1	DP238L	13.2564	0.2804	4	L60	Virulent	1	8
4h C1 L60 1.5_1	B475L	20.6191	0.00193561	4	L60	Virulent	1	8
4h C1 L60 1.5_1	A224L	13.4539	0.129853	4	L60	Virulent	1	8
4h C1 L60 1.5_1	R298L	999	0	4	L60	Virulent	1	3
4h C1 L60 1.5_1	MGF505-4R	18.5221	0.0519639	4	L60	Virulent	1	8
4h C1 L60 1.5_1	MGF360-4L	18.2451	0.0498582	4	L60	Virulent	1	8
4h C1 L60 1.5_1	MGF360-14L	17.5612	0.507458	4	L60	Virulent	1	2
4h C1 L60 1.5_1	MGF110-4L	999	0	4	L60	Virulent	1	8
24h C2 883 0.5_1	A238L	12.2799	2.73396	24	OURT88/3	Attenuated	2	8
24h C2 883 0.5_1	B119L	8.91802	6.20621	24	OURT88/3	Attenuated	2	7
24h C2 883 0.5_1	C129R	9.14256	4.03155	24	OURT88/3	Attenuated	2	8
24h C2 883 0.5_1	DP96R	9.38838	2.28878	24	OURT88/3	Attenuated	2	8
24h C2 883 0.5_1	EP364R	10.9849	4.37199	24	OURT88/3	Attenuated	2	8
24h C2 883 0.5_1	H359L	11.2843	4.66837	24	OURT88/3	Attenuated	2	8
24h C2 883 0.5_1	K78R	6.82176	3.829	24	OURT88/3	Attenuated	2	7
24h C2 883 0.5_1	MGF110-7L	999	0	24	OURT88/3	Attenuated	2	4
24h C2 883 0.5_1	MGF360-15R	9.23803	2.49189	24	OURT88/3	Attenuated	2	8
24h C2 883 0.5_1	MGF360-8L	12.0624	3.50366	24	OURT88/3	Attenuated	2	8
24h C2 883 0.5_1	MGF505-5R	12.3725	2.82709	24	OURT88/3	Attenuated	2	8
24h C2 883 0.5_1	A179L	9.69585	2.91609	24	OURT88/3	Attenuated	2	8
24h C2 883 0.5_1	B125R	10.8339	3.7453	24	OURT88/3	Attenuated	2	7
24h C2 883 0.5_1	C315R	11.1201	4.18294	24	OURT88/3	Attenuated	2	8
24h C2 883 0.5_1	E111R	9.02922	3.55084	24	OURT88/3	Attenuated	2	7
24h C2 883 0.5_1	EP424R	9.8752	3.51946	24	OURT88/3	Attenuated	2	8
24h C2 883 0.5_1	I196L	10.3073	3.34084	24	OURT88/3	Attenuated	2	7
24h C2 883 0.5_1	L60L	9.08292	3.43626	24	OURT88/3	Attenuated	2	8
24h C2 883 0.5_1	MGF300-2R	11.8378	3.03484	24	OURT88/3	Attenuated	2	8
24h C2 883 0.5_1	MGF360-16R	10.2364	3.11376	24	OURT88/3	Attenuated	2	8
24h C2 883 0.5_1	MGF360-9L	11.8686	2.95064	24	OURT88/3	Attenuated	2	8
24h C2 883 0.5_1	S183L	13.0689	3.73324	24	OURT88/3	Attenuated	2	7
24h C2 883 0.5_1	L83L	8.80874	3.35212	24	OURT88/3	Attenuated	2	8
24h C2 883 0.5_1	B263R	19.2236	13.7301	24	OURT88/3	Attenuated	2	5
24h C2 883 0.5_1	C475L	11.2682	4.33519	24	OURT88/3	Attenuated	2	8
24h C2 883 0.5_1	E146L	12.3681	3.54227	24	OURT88/3	Attenuated	2	8
24h C2 883 0.5_1	F165R	10.0308	4.4481	24	OURT88/3	Attenuated	2	7
24h C2 883 0.5_1	I215L	10.47	2.18444	24	OURT88/3	Attenuated	2	8
24h C2 883 0.5_1	MGF100-1R	11.3498	4.52415	24	OURT88/3	Attenuated	2	8
24h C2 883 0.5_1	MGF360-10L	28.065	5.007e-05	24	OURT88/3	Attenuated	2	1
24h C2 883 0.5_1	MGF360-1L	13.1905	2.11581	24	OURT88/3	Attenuated	2	8
[truncated: 10,871 more rows]
