# Supplementary material
Source: Research Square preprint supplement (doi:10.21203/rs.3.rs-9136973/v1)
Supplement: Supplementary file 2 [file 6c7e7c54a826588f709be100.xlsx]

## Sheet: Primers for viral genes
Gene	Sequence Forward	Sequence Reverse
285L	ACAAGAGTGCCTGTTACACGA	GCGGCCATCATGCATCAAAT
86R	GCGGGAAACCGTGCAATTTA	CTTTTGCTGGGAATGCGTCC
A104R	CCCGGAATCAAGTTCACCGT	CGGCTTTATGTTCAGGCTTGG
A118R	ACCGACCTATATTTGGCAGATCA	GACGTCATACATTGCCGCAC
A137R	ATCCCTGAGGAACGATGCAC	GCACTCAGGAACTTCATGCC
A151R	AGATTTGGAGTGGTGAGCCG	AGGACCGACTGAGGTTGAAACA
A179L	GCCCTTTATGCGATTTATTTTGGC	ACGAAAGTAAGTGAGCCGCA
A224L	CCCAAGGTTGCACGCATAAA	AACATGCTACTGTTGCGGAATG
A238L	GCAAAGTATTGCAAAGACGCC	CGTGGGAAATCATCCAGGGT
A240L	GGTGGCCTTATATTGCAGGTG	GTGCTGCAATTTCTGCGCTA
A859L	GCCCTTTACCCATGTGTTGC	GCCGCCAAAAAGTTCACGAT
B117L	TACATGCAAGCAAATGCCACA	GGCTCATGGAATGTGTGGTG
B119L	TATGGAACGCGAAGGTCCAG	ATCGAGTCTCTGCCATGCAC
B125R	CCAGTCAGCGCGACATATACT	TGATGAAAAGGAGGGCACGA
B169L	ACGTGCGAACCATTCAAAACA	TCCACCGGCGGATTACAAAT
B175L	TGCGTGAAAATGAGCGAGGA	CCACCTTTTGGGCTCCGTAT
B263R	TGGAGGACGAAACGGAACTG	TATGCGAACATGCAAGGCTG
B318L	CAGAGCCTTGCTCTTACGCT	AAATAGGCGCCCCAAAGGAA
B354L	ACGTACACGGTTTTGCCTGT	ATGGCCCTAACGACCCATTC
B385R	GCGACACACAGTCCAAAACTC	CGCAGTTAGGACATTGCAGC
B407L	AGGCGGTCTACTTGCTTTGT	TGCAGAGTCTGAGGCATCTC
B438L	GGTGGCTAGCTTAAAGGGCA	CCTCGTAGACGGAACCGAAC
B475L	TCGCCGGTATTCACTCTGTC	CATACAATCGCAGCCTTCTTCA
B602L	ATTACCCAAACCCCACAGGG	GGGTTTAAACGCCCTCGGAT
B646L	TACTGCGAATACCCCGGAGA	AGCGTTGTGACATCCGAACT
B66L	TGAGCAATGCCTTTGTGGACT	GGTTTTCTGCATGTCACGGC
B962L	ATGTATGAGGCATACCGCCTT	TCACCGCATCGTGGTAAGAA
C122R	TGACCCCACGAATTGCCAAA	CTCATATAGCCACAGCGGCA
C129R	TCAAAATCCCTACGAAGCCGT	TATGGGACGGCCCACGTTA
C147L	CCTCGTCGCAAACATTGGTC	CCAACTGTTGCGCTCTAACG
C257L	TGGGCAGTTCGCCAATAAGT	CTTGTCTGGCAGGGCTGTAA
C315R	GTTATCGCAGCCATCCTTGC	CTGACCGCACTCTTCGCATA
C475L	ATCTTTTCCCTTGCCCGGAT	CAACAGTCGCAGTTACCCCT
C62L	CTATATCGAGTGGCACGCCT	GCTCACAGCGGTGTTGGATA
C717R	GCCTGAGTACGTCTGCTGTT	GGCCGCCTCTATGGCATTAT
C84L	CCGGAGTGGGAAAAAGATCCA	ATTGCATCCACGTAGACCGT
C962R	GATCCAGACTGCCAAAACGC	TTCGCTCTCAATGGTGGGAC
CP123L	AAACGAGGCCGAACACCTTA	GCGTGCTCGAAGGTCCTAAA
CP204L	TTCAGTATACCCTTGCCCTGC	CGGTAGAATTGTTACGACCGC
CP2475L	ACTGCACCCCAAGACCAAAA	GCTAATTCTTGCTCCGCACG
CP312R	GGTCCTGAAGCCATGAAAACG	ACGAATGCGTGCGATAGGAT
CP530R	TGCCTACTCCAATGACCCCT	GTGTAGGAGCCGATTTCCCC
CP80R	TATTGGAACCTACGCGGCAA	CTGGAGAGAAGCATCTAATGGGA
D1133L	CGCCCACCTATCCAGGTTTT	TTTTGTTGCTCCTCCCGTCC
D117L	ACTGAAACGTCTCCACTGCT	AATCGCAGTTGTTCCGGGAT
D129L	TGCCATGCAGGCCTATTTAGA	TCTTCCAAGCTTTCGCTATCGT
D250R	AAGCAAAGGGCTCAGGAACA	GCGGGTAATCCCGGTTTCTT
D339L	CATACCCTCGTCCGAATCGC	GCCTGTTGTCTGCCAGGTAT
D345L	TAGCCCCGATGGGTTTTGTC	ATGCGTTTCGTGGCCTCATA
D79L	TGTTTATTGATTTTAAGTACTCAACAACC	ACGATGAGCAGGATACTATTATTAC
DP238L	TCCTACAATAGAATCGGTGTCATCC	AATGGAGGAGGAGGATTGCG
DP60R	GGCGGGGTAACACCAGTTAT	CTCCGCGGCCGGAAATA
DP71L	GTATGGGAAGCCGACGACAT	AGGAGCACCGTGGATAGGAG
DP96R	GAAACGACTGCACGAATGGG	GGGGATTTAGCGCCAAGACT
E111R	CCTTAATAACCGCTTTAGCGCA	ACGAAGTGTATCCACTCAAAAGC
E120R	AAGAAGATTCGAGGGACCGGA	GGGCTGGGAATGGGTTCAAA
E146L	CTGTAGTCCGGTCAGGGTTG	TAGCTTTGTCTTACCGGGCG
E165R	GCTCCGACCTAGTGCTTCAA	GTGCACATACTGCTTCTCGC
E183L	TCACGGACAACCCAGTTACG	TGTCGTGTAAGGCTCAGTCG
E184L	CCTTCGAGAGCCCATCTTTGA	CGTGTGCACCATTCTAAACCA
E199L	ATTGTCATCCTCCGCCGTTT	GCTGTACAGGCCCTTCGATT
E248R	TGTCGGGTATGAACGTGCTG	TGTCTATGGCCTGCTTGCTC
E296R	TCCAGCTATAATGACGCGGG	ATACCGCTTCCGCATTCTGT
E301R	GAAAAACTCGGCGGCGATAC	AGGAATGGTCGAGGTCAGGT
E423R	ATACGCCTATGGTTCACCGC	TTCGATGATGGCCATGCTGT
E66L	ATATAAGCATATGTGTAAACAACATATGG	AAAGCATATATCCATTATCACAAGTATAC
EP1242L	AGCGCCCCATTGTAAACAGA	TGGATGCGTTGGTGGTGTTA
EP152R	CTCATTGCATGCTTGGTGCT	AAAACCGGATCTCCATGCCA
EP153R	GCTAGTAATTTTTGTAGACAATTAAATGG	ATATTTATTATCACCACGTAATATTACCG
EP364R	AGTTGGGAATGAAGCGAGCC	CGCGACGCCTCTGTGATATT
EP402R	CTCACGATGACACCACTTCCA	TTGTGTTGAGGGACGCATGT
EP424R	GTGAGCTTCCAGGAGGGTTTA	AGGGCATCTGTTTCCGAACT
EP84R	CTCCAAGTCCGTCATAGGGG	TAGAGGCTGCTGTGGTATGAC
F1055L	TTTAAGCGCGGTCAGCTTTG	CCATAGCGTAGACCCAGCAC
F165R	CCGGCGGATGCAGAAAATAC	CGTGTCGTGCTTGTTTGGTA
F317L	ATACTGGGCGGAGCGTAATG	ACCATTCACGGTCATCGTCC
F334L	CCCCGAATGTTGGAACTGGT	TGGCATGGCTTCCCAATCAT
F778R	TACATAACAGAGGCGACGGC	GATGTGCGTTTTCGTGCTGT
G1211R	CCCAAATCAGGCAAACGACG	TGCAGGGTGCCATAGTGATG
G1340L	TCAAAACAACGCGCTTCAGG	CCCACCCACCTGTTGAAACT
G-ACD-00600	ATTGAAGGCTGAGTTGTAGGCT	TTGAAGGCTTTATGAGAACCTACCT
H108R	CGGAACAGCAGCATGAAAACA	CCAGCCACTGGTAGGGAATATG
H124R	TGTCCATCCATGCCGATGAG	TCATTATGCGCGGGATCGAA
H171R	AAACTCGATCACGACACCCC	CCGGAGGGCCTTCTATTGTT
H233R	CAATTTCCGGGGCGCTTAAC	CCGATGGCGCAGTAATGTTG
H240R	GCCCCAACCAAGTAGAGCTT	GGAAATCTAGCGGTCCCGAA
H339R	AACAAATTCCGCGCTGCAAA	TGGTTGGGTTGTAGCCTGAG
H359L	CGATCTTATACCCACCGGGC	TAAGGGCATTAGCAGAGCCG
I10L	ACACCACTGTGTACGTGGAA	CACATGAACGGATGGTAGGATCT
I177L	TGTGGAAAGTTAATGATCAGGGCT	TCATCAAATGCGAAGGGGGA
I196L	ACTGGCTGGGGAGTATCAGA	CAGGTCGACCCTAAATGACACT
I215L	TTTGAGCCGGAGACCAAGTC	ACCTCTGAAATGTGGCATCCT
I226R	AGACTCTACATTACGCGGCAA	TTGAGTTTTTCGCTGACCCG
I243L	CCAACTGCAAGCAGCGTATG	GCCAATAAACTCATGCCCGC
I267L	TTCGGGAGTGGGCTTTCATC	AGCTGTTCTTTCATGGCGGA
I329L	AGGTAGGTTGGGGTGTTGGA	GAAATTGCAGGTGGCTTTGGT
I73R	ACAATGTTGTCTTACCTACAGGTTC	GTTTTCCGTATCCAAAGCGGG
I7L	GGGCACCTATGCTGTTTCCT	GAGTATGTATGCGCCGGTGA
I8L	TTATTCGCGTGTTCGTTGGG	GGCGTTTACTATTCAATGAACCCT
I9R	ATGGAAACCTTTTCAGTAACTGCC	CAAACAGCATCGTCACTTTTCG
K145R	CGAGGGCCATCCCTTTCTTT	AGCTGTTGTATGCTGCGGTA
K196R	ATTGGCCGCACCTGTATGAA	TACAGTTCACTTCCTCCCGC
K205R	CCGGAAGTGGAGTGCCATT	AATGGCGGCCAACCTTATGA
K421R	GAAAGCGCCCACCTACTCTT	TGTAAAGCAGGGTCGCCAAA
K78R	CCATGCTTCTTCGTCCATGC	AAGACGCGATCCATTCTGGT
KP177R	TACGGATACTGCTGCCGATG	CACACCTCTTGGGGGCTATG
KP86R	ACACATTATTGGGGACAGCTACC	CTAACGCGCTGCCTTCAAAC
KP93L	ACCAAGAGGCAGGTCTATATCTACT	AGGCAGCGCGTTAGTAACAA
L11L	TTGTGTAATTGAGTCCATAACATGG	ATGTTGGAGCCAATATTAGTAATGG
L60L	GTTTTATTGTTGCAATGAGCCTGC	TTCCTAAACAGATGACTCCAACAGA
L83L	CTGAGCCTGATAAAACAAGCGA	ATGGCAACAATCTACCACTGAAT
M1249L	CGTCGACAGTTCGCAGAAAC	AGCACGTGGCATACAGAACA
M448R	ATCATCCCTTTGCAGGAGCC	GCGTACTTGCTTTGATGGGC
MGF 100-1R	CACCCTCCAGAAGATTGTTGTC	CCACCGAATCCTTTACGACCA
MGF100-1L	ACTCAGCACTCCCATCTTCTG	ACATGCTACACATGGCTCCAG
MGF100-2L	AGACATGCTACACATGGCTCC	CTCAGCACTCCCATCTTCTGG
MGF100-3L	GTGAGCCGTTTTCCAGATCTTT	CCGACCATGAAATAGAACGAATGT
MGF110 2L (L60)	GTGTTTTCCATACGTGCACCA	GGCTATCTCAGCCGGGTTTA
MGF110-10L/14L fusion (Georgia 2007/1)	GGCTATCTCAGCCGGGTTTA	GTGTTTTCCATACGTGCACCA
MGF110-12L	TCATAGCATGGAAAAATGGAGGGA	ATGCAACGCAACCAGCAAAT
MGF110-13L (L60_OURT88/1_Georgia 2007/1)	CAGGCTGCTTTGTATGTGCG	AACTGGCTGTGCTAACCAAAC
MGF110-13L (NH/P68_OURT88/3)	GGCTATCTCAGCCGGGTTTA	GTGTTTTCCATACGTGCACCA
MGF110-13L/2L fusion (L60)	GGCTATCTCAGCCGGGTTTA	GTGTTTTCCATACGTGCACCA
MGF110-14L	GGGCCACTCAGTCCTCATTC	CCAACAGAAGTCGCATTGTGG
MGF110-1L	GCTGGTCTTCCTGGTAATCTCC	CTCTTTTGGGAGGAATGCTGC
MGF110-2L	AGACCATCTTGACAAGCCCAGC	CTACAGGGGTTTTCGACCGAC
MGF110-4L	CAGGAGGGCATCTTCGTTCA	TGTGCACATTCCCAGCAAAAC
MGF110-5L	CAGGAGGGCATCTTCGTTCA	TGTGCACATTCCCAGCAAAAC
MGF110-7L	ACTCGGGTAGGTGGACATCTT	AATCCCAGCAGAACCGACAG
MGF110-8L (Georgia 2007/1)	GCGGGAAACCGTGCAATTTA	CTTTTGCTGGGAATGCGTCC
MGF110-9L	CGGTCATTCAAAGCCAACCC	CCAGCAGAAGTCGCACGAT
MGF300-1L	CAGCATGCTTGCGTCGAAAA	TAGTTGACGCCGTTGCATTG
MGF300-2R	GCAACTCGCAGATTTCGTTGA	CCACATAGTCCCGCCATTGT
MGF300-4L	TGCCCAAACAGACAGCAACA	CTCCCCAACACAAAAGCCGA
MGF360-10L	TTTACAGAATGGGGCGCAGAC	TATCCACGCGGTACTTGGCTC
MGF360-11L	CGCGCGATAAAACCAGTAGC	ACTCCCACATGATTTCCCCC
MGF360-12L	TACGGCGTTAGTGAAGGCTG	TGTTGACAGATACCAGCCCG
MGF360-13L	GACGATAGCCAGCCAGTGTT	TCGGCCACGATCCATACAAA
MGF360-14L	ACGGCGCACCTCCTATTAAC	AAGCTACCCGCCAATAGAGC
MGF360-15R	GAAACGACTGCACGAATGGG	GGGGATTTAGCGCCAAGACT
MGF360-16R	ACTTCTGCAGCGATACTGGT	ACAGCGCAGACTAAATGGCT
MGF360-17R	GTATTGGCAACGCTGCTAGG	GCGTAAGAAGTCCTCTAGCTCC
MGF360-18R	CCGCAACAAGGCTATTGAGC	TCAGCAAAGTCCGGTTCCTC
MGF360-19R	GCCATCCACTCTACAAGTGCT	GCCACCATAAACCGCAACAC
MGF360-1L	AGGTCCTGGTGCACTCCATA	GAAGGCTGTACAGGAAAACAATCA
MGF360-21R	CGGCAAGCTTCAAAGAAGGC	TGCACCCCACTTGGTAAACA
MGF360-2L	TGCTATCTCTCATACAGGCCAGA	GGCGGCTAATATGTGGGCTT
MGF360-3L	AGATAGGAGCTTCATGCCACC	CAAGCACTTGCTAAAAGGGCA
MGF360-4L	CTGCTTCGTTTTGGCACACA	ATGAGCTTGACAGAGCCTTAGT
MGF360-6L	AGCTTGGATTGTGGTGGCAT	CCAAGGCTCTGTCAAGCTCA
MGF360-8L	GCATACAAGCCAACTGCATCA	GTATGTGGCGACTCATGTGC
MGF360-9L	CGACAGGCCCACTTTAGCAT	CTACATCGGTGGCGGCTTAT
MGF505-10R	GCGGCTATCAGGTACAAGCA	GAGCCTGCACAGCATAGAGT
MGF505-11L	TGCCCGCTTCACTTTCTGAT	AGCTTCCCATCGTTCCCTTG
MGF505-1R	AGCAACATACCCTCATTCCCG	GTAAAGGTTCCCCTCCCACG
MGF505-2R	GCCTTAAGAATGGCGGGAGA	CCCTGCAAGGCTCCTATGAC
MGF505-3R	GTGGGAGTATTGCAGCCAGA	AACTTTGCCGACGCCTAGAA
MGF505-4R	TGAGATGGCATGTGAGGAACA	TCCGTTCGAAGGCGATATCAA
MGF505-5R	CTGTCACGACATCCTTCCCT	ACGGCGTGTAATACGAGACAT
MGF505-7R	ACAGGACCTCTGTCGGAAGAA	GACGGATCCATGCTCTTTCCA
MGF505-8R	AGACTTCTCCATCAGCCCAGA	TTCCGCGGGATTTTCCCAAA
MGF505-9R	TTGCAGCCTCGGAAGGAAAT	TCAGATCATATTGCCTGCCCTC
NP1450L	GCCTTGTCGTCTCCAGTTCA	GGTCCCTATGCGAGGAACAG
NP419L	ACAACTACCACTCAGCGCAT	ATGGCGCCTAAGTCCTTTCC
NP868R	GGACTCCTCCGTTCTCGTTC	GAGACCTCGCTTCCCATCAG
O174L	AAGTCTGCGGAGAACGAAAGT	GCGTATGGTTTTTCCTCGGC
O61R	TGATGGTTCAAGTGGTGGAGG	GGGGCATCCACCAAAAATAGTAAA
P1192R	TGGGAAAAGGCACCACCATT	TGGTCGCCGTATGTATCGTG
Q706L	TCACGAAAGGGGGCTTGAAA	GTGGGCTGACACATCAGACA
QP383R	TTTTACCGGCAGCTCTGAGG	TCGGCTGCTCCGATAATGAC
QP509L	TACGGGCGTAGAGGCATTTC	GATCCCTGCCGGGTAATACG
R298L	GGGAGTATCTTGCAGGGCTT	TGGGTCATCAAGTAGGGCAAC
S183L	TCAAGAAAGGGGCAGTTGGG	GCCGCTGAATTAGAGTCCGT
S273R	CAACGGGCACTGGAAAACAC	CCATCCAGCGAATAACGGGA
X64R	GGCCAATACTCATGTTTATGGCTTA	TCACATCCGTGGCATCTGAAT
X69R	TTTCTAAACTAGTTCCAAATGAATATTGG	GTACGTTATGTCCAGATAAGCC

## Sheet: Primers for host genes
Gene	Sequence Forward	Sequence Reverse
AXL	TACTTCTGGGAGCAGTTGTGG	TCGAACACCTCTCCATAGCG
B2M	CGAGACCACTAACCGGCATCA	TGGATTCATCCAACCCAGATGCA
BANF1	TGTTGTGTGCACTTCCAACG	GGGAGATGCATGCAAGTGTG
C3	ATCAAATCAGGCTCCGATGA	GGGCTTCTCTGCATTTGATG
CASP3	AGCAGTTTTATTTGCGTGCTT	CAACAGGTCCATTTGTTCCA
CCL2	GTCACCAGCAGCAAGTGTC	CCAGGTGGCTTATGGAGTC
CCL20	ACAGCAGCTCGCCAATGAA	GGATCTGCACACACGGCTAA
CCL4	TCCTCCAGCAAGACCATGAAG	GGGTCTGAGCCCATTGGTG
CD14	AAAGGAGCCACAGCCCTTTC	CGGACGTCTTCGTCGTCTAT
CD163	GTGTTGCCTGCATAGGGAGT	GCTGTCATCACAGATGGTGC
CD4	GCAGAGGGGAAGAGAGACCT	TGGGAGCATCGCCAGTTG
CGAS	AGGAAATCCTCTGGAACAGTTCTTA	CTCTCCACAGTGACACCTTCT
CIITA	GACCAAGCTACTCCAGGCAC	TCTGGATCTGCACGAGGTTG
CSF2	TGCCATCAAAGAAGCCCTGA	GCATGTCGGCTCCTGGG
CSF3	ATGAAGCTGATGGCCCTGC	GCACTTGAGCAGGAAGCTCT
CXCL10	CCCACATGTTGAGATCATTG	CATCCTTATCAGTAGTGCCG
CXCL2	ATCCAGGACCTGAAGGTGAC	GGGTTGAGACAAACTTCCTGAC
CXCL8	TGCCTTCTTGGCAGTTTTCC	CTGCACTTACTCTTGCCAGAAC
CXCL9	GCAGTGTTGCCTTGCTTTTG	TCATCCTTTGGCTGGTGTTGA
DAI	GGGGTTTACCAGCCAGAAGA	GGAAATGCAGTTGTTCAGTCCC
DDIT3	GCTGAAGAGAACGAACGGCT	GGGAGTGCTGGTCCCAAAAG
EIF2AK2	GACTGGACCCTGCACTTCTA	CGACCACTGGCCATTTCTTT
GAPDH	CCTCAACGACCACTTCGTCAA	TGGTCCAGGGGCTCTTACT
HSP70.2	TGGTGAACCACTTCGTGGAG	AAGTCGATGCCCTCGAACAG
HSPA5	TAGCTTACGGTGCTGCTGTT	AGGGGTCGCTCACCTTCATA
IFI16	AGTCAGCATCCACAACTCTCA	GGGAGGCTACTGATCTTGGC
IFIT1	TGACTCACAGCAACCATGAGTAAT	TGTCTTGAATGACCAACTCCCA
IFNA1	TTCCAGCTCTTCAGCACAGA	AGCTGCTGATCCAGTCCAGT
IFNAR1	TCAGTGGCTCCATGCCTTTT	GACACAATGGGTCGTTTTGACA
IFNB1	ATGCAACCACCACAATTCCAG	ACGGTTTCATTCCAGCCAGT
IFNG	TGAAGAATTGGAAAGAGGAGAGTGA	TGCTCCTTTGAATGGCCTGG
IFNGR1	CCATCAGATCCTCTCTGGGC	AGGGGGTCCAAATTTCCCTTG
IL10	CTGCCTCCCACTTTCTCTTG	TCAAAGGGGCTCCCTAGTTT
IL16	AGGATCTGGATGAGGCGACA	GAACACCCTGTGAACCGTGA
IL18	TGTAGCTGAAAACGATGAAGACC	CGGCTTGATGTCCCTGGTTA
IL1A	TGTGCTAAATAACCTGGATGAGG	GGTTCGTCTTCGTTTTGAGC
IL1B	GCCAGTCTTCATTGTTCAGGTTT	GGGCCATCAGCCTCAAATAAC
IL1RN	GGTTCCTCTGCACTGCACTA	ACTGGTCCTGCTGGAAGTAGA
IL23	CTACCAATGGGACATGTGGATCT	TGTTGTCCCTGAGTCCCTGA
IL27	TTGCTACGCTCCTTGGAACT	AAGGTGCTGAGACGTCATTCC
IL4R	TGTCAGCACCTCTACCTGTGA	TCAGCATATGGCAGACGCAC
IL7	TCGTGCTGCTCGAAAGTTG	TAGTGAGTTGGGCTTCACC
IRAK1	GTACCGGGCGGTGATGAGAA	TTGGGGTGACGAAACCGTGA
IRAK4	ATGGCACCTGAAGCTTTGCG	TGAGGTTCACGGTGTTCATCCA
IRF3	GCTACACCCTCTGGTTCTGC	GAGACACATGGGGACAACCT
ISG15	GGTGAGGAACGACAAGGGTC	CAGAACTGGTCAGCTTGCAC
KDM6B	CTCCCTACGGCTCAACTTGG	TGGAAGGAGGAAGCCTGGTA
MAP3K7	GGAGCAGTGTGGAGAGCTTG	ACGGTGGCCCCGTTTAGG
MAPK1	CCATCGCTGAAGCACCATTCA	CAGGAGCTGGGAGGAAGAACA
MAVS	GGACCTCTTCGACAGCCTTC	GCTGTTTGAATTCCGCAGCA
MCU	TGCAAGAAGAAGATCGGGGAA	TATCCCTGTTGAGGCAGCAA
MX1	AGTGTCGGCTGTTTACCAAG	TTCACAAACCCTGGCAACTC
MYD88	TGCGTCTGGTCCATTGCTA	TCAGAGACAACCACTACCATCC
NFKB1	ATTCTGCAGGCCACCAACTA	AGACACCAACAGCTCCACAA
NFKBIE	GCAGTTGGAAGCACTCACTT	GGAGTGCTGTCTGGTAAAGGT
NFKBIZ	TTCGTGGATCTTGAGGCAACTA	CACAGCGTTGTGTGCCATAA
NLRP3	CTGAGACCACATCCTTCCTGTC	ATGGAAGAAAGGTGTCCCAGAAG
OAS1	ACACATGTTTCCGAACGCAG	AACTTGTGAGCTTGGTGAGGAAG
PBD-2	TTGCTGCTGCTGACTGTCTG	CTTGGCCTTGCCACTGTAAC
PRKDC	CCCTGCTGGCAGGTGAG	CAGCCATGATCCGGTACGTT
RAB1B	ACACCACGGCCAAGGAATTT	CAGCCATGGTCATGAACGC
RIGI	CGACATTGCTCAGTGCAATC	TCAGCGTTAGCAGTCAGAAG
RPL19	GCTCAGAAGATACCGTGAATCTA	ACACATTCCCCTTCACTTTCA
RSAD2	CGAGTCTAACCGGCAGATGA	TTTTCTACCCCGACATCCAGG
RXFAP	ACACGTCAAACTGGAGGAAAGT	CTCTAAAAGAGTAGGTCTTGCAGGT
SAMHD1	TGTCTTGTTCGTGAACTGAGTGA	GAAAACGGCCCATGACCAAG
SCNN1B	CCCGGGGAGAAATACTGCAA	CAATTCCCTGCCTGCTCAAG
SIGLEC1	CTTCCATGCCAATGCAGCC	AAACGGGTGTCAGGCATCAG
SIKE1	GCCCTTCCGGACCAGTATCAA	GCATCCTGGTGTTCCTCCAAG
SLA-DMA	CTCCTGGAGAACGTGCTGTG	GGGAGAATCAGGCTGAGCAA
SLA-DMB	CCCAGTGCAGACAGTGAAGAT	GGAGGAAAATGTAGCCTGGGG
SLFN11	TCCTACTCCATTCGCATCGC	CGTTACTCTCAGGACGCAGG
SNX32	CAGCCAAGCAGGGCCAG	CTCATCACGAAAGGCCCCAG
SOCS3	GCCAGGGACTTCGGTTTAGG	GGAAACTTGCTGTGGGTGAC
SOD2	GGCCTACGTGAACAACCTGA	TGATTGATGTGGCCTCCACC
STAT2	CTCACTCTGGGGACCGGAAG	GCGCCATTTGGCCTCTGAAT
STING	CCCAGCTGAAGTCTCTGCAA	TACGTTCTTGTGGCGTGAT
TBK1	TTTGAGAGATGTGGTGGGTGG	CATCTTCCCCTATCACACGCA
TGF1B	CTGGAAAGCGGCAACCAAAT	GCCCGAGAGAGCAATACAGG
TGFBR1	TGCTGCAATCAGGACCATTG	GCCAGATGGTGGCTTTCCTG
TGIF2	GCCGCTGGGAAAAGCTTGC	GCACTGACAGGTTGGTCTGT
TIMD4	CGGCAGTTGGAGTCAGACA	GCCCCAGCACATGCTATTG
TIMP1	CCCAGAGTTCAACCAGACCG	GATGAACCGGATGTCAGGGG
TLR3	CCTGCATTCCAGAAGTTGAG	TGAGGTGGAGTATTGCAGAG
TLR4	TGTGCGTGTGAACACCAGAC	AGGTGGCGTTCCTGAAACTC
TLR5	CCTTCCTGCTTCTTTGATGG	CTGTGACCGTCCTGATGTAG
TLR7	TCTGCCCTGTGATGTCAGTC	GCTGGTTTCCATCCAGGTAA
TLR9	TCCAAGTGCTGGACCTGAGT	AAGGACAGGTTGAGCTTGCG
TNF	TGGCCCAAGGACTCAGATCA	GGCATACCCACTCTGCCATT
TNFAIP3	AGGAAGCTTGTGGCACTGAA	TCCTGAACACCCCACATGTAC
TNFS10	GGGCAGACCTGTGTGTTGAT	GGAGTACTTGTCCTGCATCTGT
UNC93B1	GCCGGACATCGACAGCAAAA	CGTGTAGTAGCGCTCCCAGT
VNN2	GACCCCCGCAGATTTGGTC	GCCGAACTTTCCAAAAGGGG
