# Supplementary material
Source: Research Square preprint supplement (doi:10.21203/rs.3.rs-9136973/v1)
Supplement: Supplementary file 3 [file f11b37dcb2f74829a3d869fb.xlsx]

## Sheet: Sheet1
sample	Genes	Ct	Time	Viral_strain	Virulence	Pig	FC	log2FC	cluster
24h_c2_NI	C3	11.519	24	Non infected	Non infected	2	0.725667	-0.462621	1
24h_c2_NI	CSF3	23.3122	24	Non infected	Non infected	2	0.129793	-2.94572	2
24h_c2_NI	IL1A	14.5385	24	Non infected	Non infected	2	0.425463	-1.2329	3
24h_c2_NI	IRAK4	14.7333	24	Non infected	Non infected	2	0.906963	-0.140885	1
24h_c2_NI	IFNA1	21.9628	24	Non infected	Non infected	2	0.821552	-0.283577	4
24h_c2_NI	SAMHD1	16.5501	24	Non infected	Non infected	2	0.602056	-0.73203	5
24h_c2_NI	TIMP1	18.9587	24	Non infected	Non infected	2	0.266952	-1.90535	2
24h_c2_NI	RSAD2	20.0204	24	Non infected	Non infected	2	0.184812	-2.43587	6
24h_c2_NI	CIITA	15.7781	24	Non infected	Non infected	2	0.860977	-0.215954	1
24h_c2_NI	STING	18.1977	24	Non infected	Non infected	2	0.693709	-0.527598	7
24h_c2_NI	HSP70.2	22.9746	24	Non infected	Non infected	2	0.993983	-0.00870683	6
24h_c2_NI	CASP3	15.6308	24	Non infected	Non infected	2	0.645002	-0.632623	1
24h_c2_NI	CXCL2	11.7832	24	Non infected	Non infected	2	0.595729	-0.747271	3
24h_c2_NI	IFNAR1	14.8166	24	Non infected	Non infected	2	0.738801	-0.436742	1
24h_c2_NI	IL1B	17.1995	24	Non infected	Non infected	2	0.199892	-2.32271	2
24h_c2_NI	IRF3	15.7011	24	Non infected	Non infected	2	0.869037	-0.20251	1
24h_c2_NI	MX1	17.9311	24	Non infected	Non infected	2	0.335662	-1.57492	6
24h_c2_NI	SCNN1B	999	24	Non infected	Non infected	2	1.66156e-199	-660.331
24h_c2_NI	TLR3	18.9009	24	Non infected	Non infected	2	0.223487	-2.16173	8
24h_c2_NI	VNN2	20.8367	24	Non infected	Non infected	2	0.0400557	-4.64185	7
24h_c2_NI	SIGLEC1	13.529	24	Non infected	Non infected	2	1.21059	0.275709	1
24h_c2_NI	BANF1	13.2317	24	Non infected	Non infected	2	0.692878	-0.529326	1
24h_c2_NI	SOCS3	999	24	Non infected	Non infected	2	1.36408e-101	-335.067
24h_c2_NI	CCL2	16.1951	24	Non infected	Non infected	2	0.752135	-0.410936	3
24h_c2_NI	CXCL8	12.1907	24	Non infected	Non infected	2	0.6318	-0.662461	3
24h_c2_NI	IL1RN	17.5814	24	Non infected	Non infected	2	0.966834	-0.0486602	5
24h_c2_NI	ISG15	18.3117	24	Non infected	Non infected	2	0.11439	-3.12796	6
24h_c2_NI	MYD88	13.3321	24	Non infected	Non infected	2	0.893384	-0.162647	1
24h_c2_NI	SIKE1	16.488	24	Non infected	Non infected	2	0.973564	-0.0386523	7
24h_c2_NI	TLR4	12.9308	24	Non infected	Non infected	2	0.694942	-0.525035	1
24h_c2_NI	RAB1B	14.4988	24	Non infected	Non infected	2	0.946821	-0.0788363	1
24h_c2_NI	AXL	16.1777	24	Non infected	Non infected	2	0.552712	-0.8554	5
24h_c2_NI	OAS1	15.3986	24	Non infected	Non infected	2	0.165981	-2.59091	5
24h_c2_NI	TLR5	999	24	Non infected	Non infected	2	1.89124e-297	-985.693
24h_c2_NI	CCL20	21.9871	24	Non infected	Non infected	2	1.26792	0.342466	3
24h_c2_NI	DDIT3	15.279	24	Non infected	Non infected	2	0.859522	-0.218394	1
24h_c2_NI	IFNG	999	24	Non infected	Non infected	2	4.29265e-298	-987.833
24h_c2_NI	IL23	22.4636	24	Non infected	Non infected	2	0.170397	-2.55303	2
24h_c2_NI	KDM6B	16.4264	24	Non infected	Non infected	2	0.880617	-0.183414	1
24h_c2_NI	NFKB1	13.1507	24	Non infected	Non infected	2	0.574699	-0.799121	5
24h_c2_NI	STAT2	15.722	24	Non infected	Non infected	2	0.685347	-0.545093	5
24h_c2_NI	TLR7	16.029	24	Non infected	Non infected	2	0.689231	-0.536941	7
24h_c2_NI	SLA-DMB	13.8102	24	Non infected	Non infected	2	0.664734	-0.58915	1
24h_c2_NI	ZBP1	16.8912	24	Non infected	Non infected	2	0.859316	-0.218739	6
24h_c2_NI	CXCL9	999	24	Non infected	Non infected	2	0.000931796	-10.0677
24h_c2_NI	CGAS	17.6216	24	Non infected	Non infected	2	0.430806	-1.21489	5
24h_c2_NI	NFKBIE	15.5228	24	Non infected	Non infected	2	1.00389	0.00560685	1
24h_c2_NI	MAP3K7	16.5794	24	Non infected	Non infected	2	1.16893	0.225188	1
24h_c2_NI	IL27	19.3371	24	Non infected	Non infected	2	0.9954	-0.00665217	8
24h_c2_NI	IFNGR1	13.0174	24	Non infected	Non infected	2	1.04038	0.0571117	1
24h_c2_NI	EIF2AK2	14.8466	24	Non infected	Non infected	2	0.884805	-0.176569	6
24h_c2_NI	CCL4	15.1555	24	Non infected	Non infected	2	2.08205	1.058	3
24h_c2_NI	SLA-DMA	14.0839	24	Non infected	Non infected	2	0.500079	-0.999773	1
24h_c2_NI	CXCL10	20.8544	24	Non infected	Non infected	2	0.193291	-2.37115	6
24h_c2_NI	CD163	11.5651	24	Non infected	Non infected	2	0.647711	-0.626577	1
24h_c2_NI	PKR	14.924	24	Non infected	Non infected	2	0.758516	-0.398749
24h_c2_NI	TNF	17.0057	24	Non infected	Non infected	2	1.15608	0.209238	6
24h_c2_NI	TBK1	14.7911	24	Non infected	Non infected	2	0.93682	-0.0941566	1
24h_c2_NI	NFKBIZ	15.4803	24	Non infected	Non infected	2	0.314482	-1.66895	8
24h_c2_NI	MAPK1	13.0401	24	Non infected	Non infected	2	1.33358	0.415304	1
24h_c2_NI	IL4R	14.2914	24	Non infected	Non infected	2	0.572978	-0.803448	1
24h_c2_NI	IL10	22.1615	24	Non infected	Non infected	2	5.84287e+97	324.774
24h_c2_NI	HSPA5	12.2368	24	Non infected	Non infected	2	1.0059	0.00849249	5
24h_c2_NI	CD14	16.2108	24	Non infected	Non infected	2	0.934958	-0.0970263	1
24h_c2_NI	PRKDC	20.5359	24	Non infected	Non infected	2	1.2379	0.307889	4
24h_c2_NI	B2M	8.63529	24	Non infected	Non infected	2	0.699779	-0.515028	3
24h_c2_NI	TIMD4	999	24	Non infected	Non infected	2	0.000931796	-10.0677
24h_c2_NI	IFI16	18.8115	24	Non infected	Non infected	2	1.23137	0.300258	8
24h_c2_NI	TNFAIP3	13.622	24	Non infected	Non infected	2	0.894403	-0.161003	5
24h_c2_NI	TGFB1	11.8147	24	Non infected	Non infected	2	1.27875	0.354729	1
24h_c2_NI	PBD-2	999	24	Non infected	Non infected	2	0.000931796	-10.0677
24h_c2_NI	MAVS	16.5075	24	Non infected	Non infected	2	1.61569	0.692148	1
24h_c2_NI	IL7	18.2951	24	Non infected	Non infected	2	0.690468	-0.534353	7
24h_c2_NI	IL16	15.6511	24	Non infected	Non infected	2	1.07479	0.104061	7
24h_c2_NI	IFNB1	999	24	Non infected	Non infected	2	1.56509e-297	-985.966	6
24h_c2_NI	CD4	999	24	Non infected	Non infected	2	8.45853e-200	-661.305
24h_c2_NI	TLR9	23.6584	24	Non infected	Non infected	2	4.74967e+97	324.475
24h_c2_NI	GAPDH	9.1962	24	Non infected	Non infected	2	1.15539	0.208384
24h_c2_NI	NLRP3	999	24	Non infected	Non infected	2	7.1408e-298	-987.098	2
24h_c2_NI	SLFN11	17.9093	24	Non infected	Non infected	2	0.785057	-0.349131	6
24h_c2_NI	TNFS10	22.1405	24	Non infected	Non infected	2	0.0679795	-3.87876	6
24h_c2_NI	TGFBR1	13.9456	24	Non infected	Non infected	2	0.961104	-0.0572356	1
24h_c2_NI	RIGI	15.7482	24	Non infected	Non infected	2	0.653198	-0.614408	6
24h_c2_NI	MCU	17.6225	24	Non infected	Non infected	2	1.99641	0.997411	4
24h_c2_NI	IRAK1	15.666	24	Non infected	Non infected	2	1.31333	0.393234	1
24h_c2_NI	IL18	16.1882	24	Non infected	Non infected	2	0.533327	-0.906906	7
24h_c2_NI	IFIT1	19.475	24	Non infected	Non infected	2	0.129683	-2.94694	6
24h_c2_NI	CSF2	19.9718	24	Non infected	Non infected	2	0.420394	-1.25019	2
24h_c2_NI	SOD2	11.2303	24	Non infected	Non infected	2	0.465837	-1.1021	1
24h_c2_NI	RPL19	10.7891	24	Non infected	Non infected	2	0.888125	-0.171165
24h_c2_NI	SNX32	24.2721	24	Non infected	Non infected	2	6.01378e+96	321.493
24h_c2_NI	RXFAP	17.9554	24	Non infected	Non infected	2	1.0666	0.0930152	1
24h_c2_NI	UNC93B1	13.6334	24	Non infected	Non infected	2	0.791841	-0.336717	6
24h_c2_NI	TGIF2	18.7456	24	Non infected	Non infected	2	0.876253	-0.190581	8
72h_c2_881_0.5	C3	16.7086	72	OURT88/1	Virulent	2	0.262565	-1.92925	1
72h_c2_881_0.5	CSF3	24.6002	72	OURT88/1	Virulent	2	0.701812	-0.510844	2
72h_c2_881_0.5	IL1A	20.2542	72	OURT88/1	Virulent	2	0.106895	-3.22574	3
72h_c2_881_0.5	IRAK4	19.3735	72	OURT88/1	Virulent	2	0.480246	-1.05816	1
72h_c2_881_0.5	IFNA1	23.5434	72	OURT88/1	Virulent	2	3.6269	1.85874	4
72h_c2_881_0.5	SAMHD1	22.559	72	OURT88/1	Virulent	2	0.123455	-3.01795	5
72h_c2_881_0.5	TIMP1	20.8141	72	OURT88/1	Virulent	2	0.974079	-0.0378889	2
72h_c2_881_0.5	RSAD2	24.1461	72	OURT88/1	Virulent	2	0.139794	-2.83863	6
72h_c2_881_0.5	CIITA	20.3336	72	OURT88/1	Virulent	2	0.483466	-1.04852	1
72h_c2_881_0.5	STING	24.2927	72	OURT88/1	Virulent	2	0.133997	-2.89973	7
72h_c2_881_0.5	HSP70.2	999	72	OURT88/1	Virulent	2	1.50092e-297	-986.027	6
72h_c2_881_0.5	CASP3	20.3488	72	OURT88/1	Virulent	2	0.323607	-1.62769	1
72h_c2_881_0.5	CXCL2	18.1049	72	OURT88/1	Virulent	2	0.0983406	-3.34607	3
72h_c2_881_0.5	IFNAR1	21.2064	72	OURT88/1	Virulent	2	0.116336	-3.10363	1
72h_c2_881_0.5	IL1B	21.0715	72	OURT88/1	Virulent	2	0.180268	-2.47179	2
72h_c2_881_0.5	IRF3	21.5597	72	OURT88/1	Virulent	2	0.197757	-2.3382	1
72h_c2_881_0.5	MX1	21.4792	72	OURT88/1	Virulent	2	0.378906	-1.40009	6
72h_c2_881_0.5	SCNN1B	999	72	OURT88/1	Virulent	2	1.66156e-199	-660.331
72h_c2_881_0.5	TLR3	19.4793	72	OURT88/1	Virulent	2	1.97623	0.982752	8
72h_c2_881_0.5	VNN2	999	72	OURT88/1	Virulent	2	1.37424e-299	-992.798	7
72h_c2_881_0.5	SIGLEC1	19.2919	72	OURT88/1	Virulent	2	0.294381	-1.76424	1
72h_c2_881_0.5	BANF1	17.4193	72	OURT88/1	Virulent	2	0.502091	-0.99398	1
72h_c2_881_0.5	SOCS3	25.2278	72	OURT88/1	Virulent	2	2.50198e+196	652.421
72h_c2_881_0.5	CCL2	999	72	OURT88/1	Virulent	2	1.03382e-299	-993.209	3
72h_c2_881_0.5	CXCL8	15.2642	72	OURT88/1	Virulent	2	0.991007	-0.0130334	3
72h_c2_881_0.5	IL1RN	25.1797	72	OURT88/1	Virulent	2	0.0658782	-3.92405	5
72h_c2_881_0.5	ISG15	21.6214	72	OURT88/1	Virulent	2	0.152327	-2.71475	6
72h_c2_881_0.5	MYD88	18.4007	72	OURT88/1	Virulent	2	0.351518	-1.50833	1
72h_c2_881_0.5	SIKE1	19.8952	72	OURT88/1	Virulent	2	1.2117	0.277035	7
72h_c2_881_0.5	TLR4	20.1719	72	OURT88/1	Virulent	2	0.0606554	-4.04322	1
72h_c2_881_0.5	RAB1B	20.3444	72	OURT88/1	Virulent	2	0.21741	-2.20151	1
72h_c2_881_0.5	AXL	21.9713	72	OURT88/1	Virulent	2	0.131572	-2.92608	5
72h_c2_881_0.5	OAS1	22.4745	72	OURT88/1	Virulent	2	0.0162448	-5.94388	5
72h_c2_881_0.5	TLR5	23.3005	72	OURT88/1	Virulent	2	13.1937	3.72178
72h_c2_881_0.5	CCL20	999	72	OURT88/1	Virulent	2	9.65615e-298	-986.663	3
72h_c2_881_0.5	DDIT3	20.3928	72	OURT88/1	Virulent	2	0.327762	-1.60928	1
72h_c2_881_0.5	IFNG	26.3203	72	OURT88/1	Virulent	2	0.369231	-1.4374
72h_c2_881_0.5	IL23	999	72	OURT88/1	Virulent	2	1.8056e-298	-989.082	2
72h_c2_881_0.5	KDM6B	20.563	72	OURT88/1	Virulent	2	0.661078	-0.597108	1
72h_c2_881_0.5	NFKB1	18.9506	72	OURT88/1	Virulent	2	0.13621	-2.87609	5
72h_c2_881_0.5	STAT2	19.9175	72	OURT88/1	Virulent	2	0.493905	-1.01769	5
72h_c2_881_0.5	TLR7	999	72	OURT88/1	Virulent	2	8.44328e-300	-993.501	7
72h_c2_881_0.5	SLA-DMB	18.7628	72	OURT88/1	Virulent	2	0.283437	-1.8189	1
72h_c2_881_0.5	ZBP1	22.2823	72	OURT88/1	Virulent	2	0.270382	-1.88693	6
72h_c2_881_0.5	CXCL9	999	72	OURT88/1	Virulent	2	0.000931796	-10.0677
72h_c2_881_0.5	CGAS	999	72	OURT88/1	Virulent	2	1.5917e-299	-992.586	5
72h_c2_881_0.5	NFKBIE	21.9483	72	OURT88/1	Virulent	2	0.154221	-2.69693	1
72h_c2_881_0.5	MAP3K7	20.8276	72	OURT88/1	Virulent	2	0.812194	-0.300104	1
72h_c2_881_0.5	IL27	24.2407	72	OURT88/1	Virulent	2	0.439102	-1.18737	8
72h_c2_881_0.5	IFNGR1	20.3643	72	OURT88/1	Virulent	2	0.0843849	-3.56687	1
72h_c2_881_0.5	EIF2AK2	20.0305	72	OURT88/1	Virulent	2	0.321397	-1.63757	6
72h_c2_881_0.5	CCL4	20.5409	72	OURT88/1	Virulent	2	0.657726	-0.604441	3
72h_c2_881_0.5	SLA-DMA	20.3009	72	OURT88/1	Virulent	2	0.0887656	-3.49386	1
72h_c2_881_0.5	CXCL10	999	72	OURT88/1	Virulent	2	6.71369e-299	-990.509	6
72h_c2_881_0.5	CD163	19.8063	72	OURT88/1	Virulent	2	0.028265	-5.14484	1
72h_c2_881_0.5	PKR	17.9039	72	OURT88/1	Virulent	2	1.26949	0.344246
72h_c2_881_0.5	TNF	21.8037	72	OURT88/1	Virulent	2	0.548737	-0.865812	6
72h_c2_881_0.5	TBK1	20.1586	72	OURT88/1	Virulent	2	0.29964	-1.7387	1
72h_c2_881_0.5	NFKBIZ	23.6111	72	OURT88/1	Virulent	2	0.0148151	-6.07678	8
72h_c2_881_0.5	MAPK1	17.5395	72	OURT88/1	Virulent	2	0.778524	-0.361187	1
72h_c2_881_0.5	IL4R	23.4904	72	OURT88/1	Virulent	2	0.012873	-6.27951	1
72h_c2_881_0.5	IL10	999	72	OURT88/1	Virulent	2	5.02176e-200	-662.057
72h_c2_881_0.5	HSPA5	16.617	72	OURT88/1	Virulent	2	0.637797	-0.64883	5
72h_c2_881_0.5	CD14	25.0209	72	OURT88/1	Virulent	2	0.0275041	-5.18421	1
72h_c2_881_0.5	PRKDC	999	72	OURT88/1	Virulent	2	3.44779e-298	-988.149	4
72h_c2_881_0.5	B2M	12.6806	72	OURT88/1	Virulent	2	0.559651	-0.837401	3
72h_c2_881_0.5	TIMD4	999	72	OURT88/1	Virulent	2	0.000931796	-10.0677
72h_c2_881_0.5	IFI16	22.5383	72	OURT88/1	Virulent	2	1.22806	0.296378	8
72h_c2_881_0.5	TNFAIP3	20.3725	72	OURT88/1	Virulent	2	0.109681	-3.18862	5
72h_c2_881_0.5	TGFB1	16.3507	72	OURT88/1	Virulent	2	0.727799	-0.458388	1
72h_c2_881_0.5	PBD-2	999	72	OURT88/1	Virulent	2	0.000931796	-10.0677
72h_c2_881_0.5	MAVS	21.7852	72	OURT88/1	Virulent	2	0.549946	-0.862638	1
72h_c2_881_0.5	IL7	22.8145	72	OURT88/1	Virulent	2	0.397518	-1.33091	7
72h_c2_881_0.5	IL16	22.8742	72	OURT88/1	Virulent	2	0.0949849	-3.39616	7
72h_c2_881_0.5	IFNB1	999	72	OURT88/1	Virulent	2	1.56509e-297	-985.966	6
72h_c2_881_0.5	CD4	999	72	OURT88/1	Virulent	2	8.45853e-200	-661.305
72h_c2_881_0.5	TLR9	23.8947	72	OURT88/1	Virulent	2	5.32372e+98	327.961
72h_c2_881_0.5	GAPDH	13.2497	72	OURT88/1	Virulent	2	0.918794	-0.122186
72h_c2_881_0.5	NLRP3	24.1224	72	OURT88/1	Virulent	2	2.81803	1.49469	2
72h_c2_881_0.5	SLFN11	22.5709	72	OURT88/1	Virulent	2	0.409588	-1.28775	6
72h_c2_881_0.5	TNFS10	24.2388	72	OURT88/1	Virulent	2	0.209628	-2.2541	6
72h_c2_881_0.5	TGFBR1	21.1915	72	OURT88/1	Virulent	2	0.0836116	-3.58015	1
72h_c2_881_0.5	RIGI	24.3859	72	OURT88/1	Virulent	2	0.021655	-5.52915	6
72h_c2_881_0.5	MCU	999	72	OURT88/1	Virulent	2	7.38062e-299	-990.373	4
72h_c2_881_0.5	IRAK1	20.0469	72	OURT88/1	Virulent	2	0.832387	-0.264675	1
72h_c2_881_0.5	IL18	22.7876	72	OURT88/1	Virulent	2	0.0726281	-3.78333	7
72h_c2_881_0.5	IFIT1	21.7952	72	OURT88/1	Virulent	2	0.342889	-1.54419	6
72h_c2_881_0.5	CSF2	23.8993	72	OURT88/1	Virulent	2	0.364817	-1.45476	2
72h_c2_881_0.5	SOD2	17.0111	72	OURT88/1	Virulent	2	0.111877	-3.16002	1
72h_c2_881_0.5	RPL19	14.1815	72	OURT88/1	Virulent	2	1.11683	0.159405
72h_c2_881_0.5	SNX32	21.7169	72	OURT88/1	Virulent	2	4.66715e+98	327.771
72h_c2_881_0.5	RXFAP	999	72	OURT88/1	Virulent	2	4.96664e-299	-990.944	1
72h_c2_881_0.5	UNC93B1	18.599	72	OURT88/1	Virulent	2	0.334619	-1.57941	6
72h_c2_881_0.5	TGIF2	999	72	OURT88/1	Virulent	2	7.05611e-299	-990.438	8
8h_c3_NHP_1.5	C3	10.9019	8	NH/P68	Attenuated	3	1.16557	0.221031	1
8h_c3_NHP_1.5	CSF3	23.7911	8	NH/P68	Attenuated	3	0.0975255	-3.35808	2
8h_c3_NHP_1.5	IL1A	15.6653	8	NH/P68	Attenuated	3	0.204024	-2.29319	3
8h_c3_NHP_1.5	IRAK4	14.4841	8	NH/P68	Attenuated	3	1.12889	0.174899	1
8h_c3_NHP_1.5	IFNA1	21.6606	8	NH/P68	Attenuated	3	1.0608	0.0851514	4
8h_c3_NHP_1.5	SAMHD1	15.8649	8	NH/P68	Attenuated	3	1.0138	0.0197701	5
8h_c3_NHP_1.5	TIMP1	20.3389	8	NH/P68	Attenuated	3	0.107393	-3.21902	2
8h_c3_NHP_1.5	RSAD2	14.8779	8	NH/P68	Attenuated	3	6.83602	2.77316	6
8h_c3_NHP_1.5	CIITA	15.8814	8	NH/P68	Attenuated	3	0.839318	-0.25271	1
8h_c3_NHP_1.5	STING	21.0404	8	NH/P68	Attenuated	3	0.101261	-3.30386	7
8h_c3_NHP_1.5	HSP70.2	21.6187	8	NH/P68	Attenuated	3	2.66422	1.41371	6
8h_c3_NHP_1.5	CASP3	15.8473	8	NH/P68	Attenuated	3	0.581303	-0.782638	1
8h_c3_NHP_1.5	CXCL2	13.3848	8	NH/P68	Attenuated	3	0.205567	-2.28232	3
8h_c3_NHP_1.5	IFNAR1	15.0001	8	NH/P68	Attenuated	3	0.681253	-0.553737	1
8h_c3_NHP_1.5	IL1B	17.7293	8	NH/P68	Attenuated	3	0.144996	-2.78592	2
8h_c3_NHP_1.5	IRF3	15.5466	8	NH/P68	Attenuated	3	1.01296	0.0185714	1
8h_c3_NHP_1.5	MX1	14.0729	8	NH/P68	Attenuated	3	5.0976	2.34982	6
8h_c3_NHP_1.5	SCNN1B	999	8	NH/P68	Attenuated	3	1.66156e-199	-660.331
8h_c3_NHP_1.5	TLR3	18.8082	8	NH/P68	Attenuated	3	0.249562	-2.00253	8
8h_c3_NHP_1.5	VNN2	17.7121	8	NH/P68	Attenuated	3	0.365824	-1.45078	7
8h_c3_NHP_1.5	SIGLEC1	13.5719	8	NH/P68	Attenuated	3	1.2306	0.299357	1
8h_c3_NHP_1.5	BANF1	12.6225	8	NH/P68	Attenuated	3	1.1068	0.1464	1
8h_c3_NHP_1.5	SOCS3	999	8	NH/P68	Attenuated	3	1.36408e-101	-335.067
8h_c3_NHP_1.5	CCL2	17.4926	8	NH/P68	Attenuated	3	0.320433	-1.64191	3
8h_c3_NHP_1.5	CXCL8	12.9381	8	NH/P68	Attenuated	3	0.394103	-1.34336	3
8h_c3_NHP_1.5	IL1RN	17.179	8	NH/P68	Attenuated	3	1.33813	0.420217	5
8h_c3_NHP_1.5	ISG15	10.9913	8	NH/P68	Attenuated	3	19.1461	4.25898	6
8h_c3_NHP_1.5	MYD88	13.3317	8	NH/P68	Attenuated	3	0.935792	-0.0957401	1
8h_c3_NHP_1.5	SIKE1	17.1462	8	NH/P68	Attenuated	3	0.646013	-0.630366	7
8h_c3_NHP_1.5	TLR4	12.9081	8	NH/P68	Attenuated	3	0.739284	-0.435799	1
8h_c3_NHP_1.5	RAB1B	14.5899	8	NH/P68	Attenuated	3	0.930808	-0.103444	1
8h_c3_NHP_1.5	AXL	15.3759	8	NH/P68	Attenuated	3	1.00902	0.0129565	5
8h_c3_NHP_1.5	OAS1	11.9006	8	NH/P68	Attenuated	3	1.9638	0.973647	5
8h_c3_NHP_1.5	TLR5	999	8	NH/P68	Attenuated	3	1.89124e-297	-985.693
8h_c3_NHP_1.5	CCL20	23.5341	8	NH/P68	Attenuated	3	0.454391	-1.138	3
8h_c3_NHP_1.5	DDIT3	14.8566	8	NH/P68	Attenuated	3	1.2062	0.270464	1
8h_c3_NHP_1.5	IFNG	999	8	NH/P68	Attenuated	3	4.29265e-298	-987.833
8h_c3_NHP_1.5	IL23	999	8	NH/P68	Attenuated	3	1.8056e-298	-989.082	2
8h_c3_NHP_1.5	KDM6B	16.8398	8	NH/P68	Attenuated	3	0.692421	-0.53028	1
8h_c3_NHP_1.5	NFKB1	13.4327	8	NH/P68	Attenuated	3	0.494982	-1.01455	5
8h_c3_NHP_1.5	STAT2	15.3531	8	NH/P68	Attenuated	3	0.926782	-0.109699	5
8h_c3_NHP_1.5	TLR7	16.9907	8	NH/P68	Attenuated	3	0.370597	-1.43208	7
8h_c3_NHP_1.5	SLA-DMB	12.8363	8	NH/P68	Attenuated	3	1.36725	0.451273	1
8h_c3_NHP_1.5	ZBP1	15.4329	8	NH/P68	Attenuated	3	2.47263	1.30605	6
8h_c3_NHP_1.5	CXCL9	999	8	NH/P68	Attenuated	3	0.000931796	-10.0677
8h_c3_NHP_1.5	CGAS	16.5364	8	NH/P68	Attenuated	3	0.957208	-0.0630963	5
8h_c3_NHP_1.5	NFKBIE	16.0485	8	NH/P68	Attenuated	3	0.73028	-0.453479	1
8h_c3_NHP_1.5	MAP3K7	16.3374	8	NH/P68	Attenuated	3	1.44771	0.533768	1
8h_c3_NHP_1.5	IL27	20.3749	8	NH/P68	Attenuated	3	0.507707	-0.977932	8
8h_c3_NHP_1.5	IFNGR1	12.9917	8	NH/P68	Attenuated	3	1.10905	0.149321	1
8h_c3_NHP_1.5	EIF2AK2	13.3371	8	NH/P68	Attenuated	3	2.63789	1.39939	6
8h_c3_NHP_1.5	CCL4	16.5047	8	NH/P68	Attenuated	3	0.855815	-0.224629	3
8h_c3_NHP_1.5	SLA-DMA	13.2118	8	NH/P68	Attenuated	3	0.958504	-0.0611441	1
8h_c3_NHP_1.5	CXCL10	17.0293	8	NH/P68	Attenuated	3	2.86884	1.52047	6
8h_c3_NHP_1.5	CD163	12.0992	8	NH/P68	Attenuated	3	0.468415	-1.09414	1
8h_c3_NHP_1.5	PKR	13.0086	8	NH/P68	Attenuated	3	2.9963	1.58318
8h_c3_NHP_1.5	TNF	17.0095	8	NH/P68	Attenuated	3	1.20749	0.272011	6
8h_c3_NHP_1.5	TBK1	14.6326	8	NH/P68	Attenuated	3	1.09495	0.130862	1
8h_c3_NHP_1.5	NFKBIZ	15.0037	8	NH/P68	Attenuated	3	0.458247	-1.1258	8
8h_c3_NHP_1.5	MAPK1	13.6717	8	NH/P68	Attenuated	3	0.901341	-0.149856	1
8h_c3_NHP_1.5	IL4R	15.3147	8	NH/P68	Attenuated	3	0.295212	-1.76018	1
8h_c3_NHP_1.5	IL10	21.2419	8	NH/P68	Attenuated	3	1.15746e+98	325.76
8h_c3_NHP_1.5	HSPA5	12.5489	8	NH/P68	Attenuated	3	0.848423	-0.237144	5
8h_c3_NHP_1.5	CD14	16.999	8	NH/P68	Attenuated	3	0.566949	-0.81871	1
8h_c3_NHP_1.5	PRKDC	19.9591	8	NH/P68	Attenuated	3	1.93346	0.951186	4
8h_c3_NHP_1.5	B2M	8.05703	8	NH/P68	Attenuated	3	1.09411	0.12976	3
8h_c3_NHP_1.5	TIMD4	999	8	NH/P68	Attenuated	3	0.000931796	-10.0677
8h_c3_NHP_1.5	IFI16	18.1638	8	NH/P68	Attenuated	3	2.0201	1.01443	8
8h_c3_NHP_1.5	TNFAIP3	13.7566	8	NH/P68	Attenuated	3	0.853144	-0.229139	5
8h_c3_NHP_1.5	TGFB1	12.4271	8	NH/P68	Attenuated	3	0.87592	-0.191128	1
8h_c3_NHP_1.5	PBD-2	999	8	NH/P68	Attenuated	3	0.000931796	-10.0677
8h_c3_NHP_1.5	MAVS	17.3906	8	NH/P68	Attenuated	3	0.917375	-0.124416	1
8h_c3_NHP_1.5	IL7	19.264	8	NH/P68	Attenuated	3	0.369386	-1.4368	7
8h_c3_NHP_1.5	IL16	16.8301	8	NH/P68	Attenuated	3	0.497084	-1.00844	7
8h_c3_NHP_1.5	IFNB1	19.6533	8	NH/P68	Attenuated	3	10.8489	3.43948	6
8h_c3_NHP_1.5	CD4	999	8	NH/P68	Attenuated	3	8.45853e-200	-661.305
8h_c3_NHP_1.5	TLR9	999	8	NH/P68	Attenuated	3	1.15207e-199	-660.859
8h_c3_NHP_1.5	GAPDH	9.84661	8	NH/P68	Attenuated	3	0.770842	-0.375493
8h_c3_NHP_1.5	NLRP3	999	8	NH/P68	Attenuated	3	7.1408e-298	-987.098	2
8h_c3_NHP_1.5	SLFN11	17.2631	8	NH/P68	Attenuated	3	1.2867	0.363673	6
8h_c3_NHP_1.5	TNFS10	16.6184	8	NH/P68	Attenuated	3	3.27123	1.70983	6
8h_c3_NHP_1.5	TGFBR1	13.3849	8	NH/P68	Attenuated	3	1.48454	0.570018	1
8h_c3_NHP_1.5	RIGI	14.5289	8	NH/P68	Attenuated	3	1.59269	0.671462	6
8h_c3_NHP_1.5	MCU	17.8467	8	NH/P68	Attenuated	3	1.7897	0.839716	4
8h_c3_NHP_1.5	IRAK1	15.2124	8	NH/P68	Attenuated	3	1.8835	0.913415	1
8h_c3_NHP_1.5	IL18	18.1499	8	NH/P68	Attenuated	3	0.143388	-2.802	7
8h_c3_NHP_1.5	IFIT1	14.446	8	NH/P68	Attenuated	3	4.43423	2.14868	6
8h_c3_NHP_1.5	CSF2	21.4719	8	NH/P68	Attenuated	3	0.155637	-2.68374	2
8h_c3_NHP_1.5	SOD2	11.3465	8	NH/P68	Attenuated	3	0.450072	-1.15177	1
8h_c3_NHP_1.5	RPL19	10.2718	8	NH/P68	Attenuated	3	1.33119	0.412712
8h_c3_NHP_1.5	SNX32	20.983	8	NH/P68	Attenuated	3	6.1561e+97	324.849
8h_c3_NHP_1.5	RXFAP	18.0837	8	NH/P68	Attenuated	3	1.02193	0.0312911	1
8h_c3_NHP_1.5	UNC93B1	12.8672	8	NH/P68	Attenuated	3	1.41024	0.495942	6
8h_c3_NHP_1.5	TGIF2	20.4103	8	NH/P68	Attenuated	3	0.289428	-1.78872	8
48h_c3_881_1.5	C3	14.3223	48	OURT88/1	Virulent	3	0.448012	-1.15839	1
48h_c3_881_1.5	CSF3	25.2544	48	OURT88/1	Virulent	3	0.145548	-2.78044	2
48h_c3_881_1.5	IL1A	18.6077	48	OURT88/1	Virulent	3	0.109224	-3.19464	3
48h_c3_881_1.5	IRAK4	18.3508	48	OURT88/1	Virulent	3	0.318464	-1.6508	1
48h_c3_881_1.5	IFNA1	23.3245	48	OURT88/1	Virulent	3	1.37771	0.462271	4
48h_c3_881_1.5	SAMHD1	18.7123	48	OURT88/1	Virulent	3	0.579695	-0.786633	5
48h_c3_881_1.5	TIMP1	17.9171	48	OURT88/1	Virulent	3	2.3682	1.24379	2
48h_c3_881_1.5	RSAD2	21.4093	48	OURT88/1	Virulent	3	0.304147	-1.71716	6
48h_c3_881_1.5	CIITA	19.4739	48	OURT88/1	Virulent	3	0.286332	-1.80424	1
48h_c3_881_1.5	STING	24.3956	48	OURT88/1	Virulent	3	0.0407229	-4.61802	7
48h_c3_881_1.5	HSP70.2	26.2652	48	OURT88/1	Virulent	3	0.437775	-1.19174	6
48h_c3_881_1.5	CASP3	18.4269	48	OURT88/1	Virulent	3	0.400223	-1.32112	1
48h_c3_881_1.5	CXCL2	15.8463	48	OURT88/1	Virulent	3	0.153594	-2.7028	3
48h_c3_881_1.5	IFNAR1	18.8296	48	OURT88/1	Virulent	3	0.197213	-2.34217	1
48h_c3_881_1.5	IL1B	20.7589	48	OURT88/1	Virulent	3	0.0730718	-3.77454	2
48h_c3_881_1.5	IRF3	18.2966	48	OURT88/1	Virulent	3	0.619676	-0.690413	1
48h_c3_881_1.5	MX1	20.0781	48	OURT88/1	Virulent	3	0.326594	-1.61443	6
48h_c3_881_1.5	SCNN1B	999	48	OURT88/1	Virulent	3	1.66156e-199	-660.331
48h_c3_881_1.5	TLR3	20.5109	48	OURT88/1	Virulent	3	0.315528	-1.66416	8
48h_c3_881_1.5	VNN2	999	48	OURT88/1	Virulent	3	1.37424e-299	-992.798	7
48h_c3_881_1.5	SIGLEC1	16.6397	48	OURT88/1	Virulent	3	0.603982	-0.727423	1
48h_c3_881_1.5	BANF1	15.673	48	OURT88/1	Virulent	3	0.549782	-0.863068	1
48h_c3_881_1.5	SOCS3	999	48	OURT88/1	Virulent	3	1.36408e-101	-335.067
48h_c3_881_1.5	CCL2	16.4805	48	OURT88/1	Virulent	3	2.65968	1.41125	3
48h_c3_881_1.5	CXCL8	14.7355	48	OURT88/1	Virulent	3	0.466618	-1.09969	3
48h_c3_881_1.5	IL1RN	20.8315	48	OURT88/1	Virulent	3	0.437924	-1.19125	5
48h_c3_881_1.5	ISG15	18.769	48	OURT88/1	Virulent	3	0.359056	-1.47772	6
48h_c3_881_1.5	MYD88	16.9211	48	OURT88/1	Virulent	3	0.319952	-1.64407	1
48h_c3_881_1.5	SIKE1	21.1184	48	OURT88/1	Virulent	3	0.169398	-2.56151	7
48h_c3_881_1.5	TLR4	17.93	48	OURT88/1	Virulent	3	0.0936415	-3.41671	1
48h_c3_881_1.5	RAB1B	17.6254	48	OURT88/1	Virulent	3	0.467186	-1.09793	1
48h_c3_881_1.5	AXL	19.3409	48	OURT88/1	Virulent	3	0.265895	-1.91107	5
48h_c3_881_1.5	OAS1	16.7534	48	OURT88/1	Virulent	3	0.279669	-1.83821	5
48h_c3_881_1.5	TLR5	999	48	OURT88/1	Virulent	3	1.89124e-297	-985.693
48h_c3_881_1.5	CCL20	999	48	OURT88/1	Virulent	3	9.65615e-298	-986.663	3
48h_c3_881_1.5	DDIT3	19.7473	48	OURT88/1	Virulent	3	0.167332	-2.57922	1
48h_c3_881_1.5	IFNG	22.0107	48	OURT88/1	Virulent	3	2.38976	1.25687
48h_c3_881_1.5	IL23	999	48	OURT88/1	Virulent	3	1.8056e-298	-989.082	2
48h_c3_881_1.5	KDM6B	19.8728	48	OURT88/1	Virulent	3	0.348146	-1.52224	1
48h_c3_881_1.5	NFKB1	16.9441	48	OURT88/1	Virulent	3	0.178633	-2.48493	5
48h_c3_881_1.5	STAT2	19.0138	48	OURT88/1	Virulent	3	0.30159	-1.72934	5
48h_c3_881_1.5	TLR7	999	48	OURT88/1	Virulent	3	8.44328e-300	-993.501	7
48h_c3_881_1.5	SLA-DMB	17.696	48	OURT88/1	Virulent	3	0.193787	-2.36746	1
48h_c3_881_1.5	ZBP1	20.6801	48	OURT88/1	Virulent	3	0.267925	-1.9001	6
48h_c3_881_1.5	CXCL9	24.8366	48	OURT88/1	Virulent	3	7.31583e+293	976.196
48h_c3_881_1.5	CGAS	20.9053	48	OURT88/1	Virulent	3	0.190653	-2.39098	5
48h_c3_881_1.5	NFKBIE	19.7672	48	OURT88/1	Virulent	3	0.228263	-2.13123	1
48h_c3_881_1.5	MAP3K7	19.9175	48	OURT88/1	Virulent	3	0.498136	-1.00539	1
48h_c3_881_1.5	IL27	24.4331	48	OURT88/1	Virulent	3	0.125419	-2.99517	8
48h_c3_881_1.5	IFNGR1	17.1151	48	OURT88/1	Virulent	3	0.261877	-1.93304	1
48h_c3_881_1.5	EIF2AK2	17.1201	48	OURT88/1	Virulent	3	0.788658	-0.342528	6
48h_c3_881_1.5	CCL4	20.5309	48	OURT88/1	Virulent	3	0.216163	-2.20981	3
48h_c3_881_1.5	SLA-DMA	17.6936	48	OURT88/1	Virulent	3	0.176533	-2.50199	1
48h_c3_881_1.5	CXCL10	20.8274	48	OURT88/1	Virulent	3	0.848773	-0.236549	6
48h_c3_881_1.5	CD163	16.0168	48	OURT88/1	Virulent	3	0.127567	-2.97067	1
48h_c3_881_1.5	PKR	16.5482	48	OURT88/1	Virulent	3	1.06037	0.0845723
48h_c3_881_1.5	TNF	20.4162	48	OURT88/1	Virulent	3	0.468549	-1.09373	6
48h_c3_881_1.5	TBK1	18.3438	48	OURT88/1	Virulent	3	0.344054	-1.53929	1
48h_c3_881_1.5	NFKBIZ	19.3016	48	OURT88/1	Virulent	3	0.0958725	-3.38274	8
48h_c3_881_1.5	MAPK1	16.5798	48	OURT88/1	Virulent	3	0.494176	-1.0169	1
48h_c3_881_1.5	IL4R	19.0831	48	OURT88/1	Virulent	3	0.0891529	-3.48757	1
48h_c3_881_1.5	IL10	999	48	OURT88/1	Virulent	3	5.02176e-200	-662.057
48h_c3_881_1.5	HSPA5	15.8447	48	OURT88/1	Virulent	3	0.355556	-1.49185	5
48h_c3_881_1.5	CD14	24.5766	48	OURT88/1	Virulent	3	0.0122147	-6.35524	1
48h_c3_881_1.5	PRKDC	21.5623	48	OURT88/1	Virulent	3	2.61908	1.38906	4
48h_c3_881_1.5	B2M	11.5717	48	OURT88/1	Virulent	3	0.393959	-1.34388	3
48h_c3_881_1.5	TIMD4	999	48	OURT88/1	Virulent	3	0.000931796	-10.0677
48h_c3_881_1.5	IFI16	22.8787	48	OURT88/1	Virulent	3	0.31657	-1.6594	8
48h_c3_881_1.5	TNFAIP3	18.0243	48	OURT88/1	Virulent	3	0.182276	-2.4558	5
48h_c3_881_1.5	TGFB1	15.6336	48	OURT88/1	Virulent	3	0.390495	-1.35663	1
48h_c3_881_1.5	PBD-2	999	48	OURT88/1	Virulent	3	0.000931796	-10.0677
48h_c3_881_1.5	MAVS	23.1084	48	OURT88/1	Virulent	3	0.0717353	-3.80117	1
48h_c3_881_1.5	IL7	999	48	OURT88/1	Virulent	3	4.06863e-299	-991.232	7
48h_c3_881_1.5	IL16	21.8656	48	OURT88/1	Virulent	3	0.0623737	-4.00292	7
48h_c3_881_1.5	IFNB1	999	48	OURT88/1	Virulent	3	1.56509e-297	-985.966	6
48h_c3_881_1.5	CD4	999	48	OURT88/1	Virulent	3	8.45853e-200	-661.305
48h_c3_881_1.5	TLR9	999	48	OURT88/1	Virulent	3	1.15207e-199	-660.859
48h_c3_881_1.5	GAPDH	11.7117	48	OURT88/1	Virulent	3	0.870785	-0.199612
48h_c3_881_1.5	NLRP3	999	48	OURT88/1	Virulent	3	7.1408e-298	-987.098	2
48h_c3_881_1.5	SLFN11	999	48	OURT88/1	Virulent	3	3.5407e-299	-991.432	6
48h_c3_881_1.5	TNFS10	23.1644	48	OURT88/1	Virulent	3	0.144071	-2.79515	6
48h_c3_881_1.5	TGFBR1	17.9731	48	OURT88/1	Virulent	3	0.254	-1.9771	1
48h_c3_881_1.5	RIGI	20.5571	48	OURT88/1	Virulent	3	0.100426	-3.3158	6
48h_c3_881_1.5	MCU	18.4876	48	OURT88/1	Virulent	3	4.72368	2.23991	4
48h_c3_881_1.5	IRAK1	17.9152	48	OURT88/1	Virulent	3	1.19055	0.251632	1
48h_c3_881_1.5	IL18	18.3635	48	OURT88/1	Virulent	3	0.50889	-0.974574	7
48h_c3_881_1.5	IFIT1	20.4287	48	OURT88/1	Virulent	3	0.288557	-1.79307	6
48h_c3_881_1.5	CSF2	20.6862	48	OURT88/1	Virulent	3	1.10416	0.142946	2
48h_c3_881_1.5	SOD2	15.8326	48	OURT88/1	Virulent	3	0.0826461	-3.59691	1
48h_c3_881_1.5	RPL19	12.4887	48	OURT88/1	Virulent	3	1.1784	0.236831
48h_c3_881_1.5	SNX32	25.5939	48	OURT88/1	Virulent	3	1.03679e+97	322.279
48h_c3_881_1.5	RXFAP	21.4274	48	OURT88/1	Virulent	3	0.414258	-1.2714	1
48h_c3_881_1.5	UNC93B1	16.4384	48	OURT88/1	Virulent	3	0.488268	-1.03425	6
48h_c3_881_1.5	TGIF2	999	48	OURT88/1	Virulent	3	7.05611e-299	-990.438	8
4h_c1_881_1.5	C3	11.6457	4	OURT88/1	Virulent	1	0.702049	-0.510356	1
4h_c1_881_1.5	CSF3	20.3525	4	OURT88/1	Virulent	1	1.06647	0.092842	2
4h_c1_881_1.5	IL1A	15.0643	4	OURT88/1	Virulent	1	0.312124	-1.67981	3
4h_c1_881_1.5	IRAK4	15.678	4	OURT88/1	Virulent	1	0.497687	-1.00669	1
4h_c1_881_1.5	IFNA1	24.0694	4	OURT88/1	Virulent	1	0.201475	-2.31133	4
4h_c1_881_1.5	SAMHD1	15.6895	4	OURT88/1	Virulent	1	1.15472	0.20754	5
4h_c1_881_1.5	TIMP1	16.6097	4	OURT88/1	Virulent	1	1.43647	0.522529	2
4h_c1_881_1.5	RSAD2	17.6076	4	OURT88/1	Virulent	1	1.03951	0.0559022	6
4h_c1_881_1.5	CIITA	16.5776	4	OURT88/1	Virulent	1	0.5225	-0.936496	1
4h_c1_881_1.5	STING	18.438	4	OURT88/1	Virulent	1	0.620272	-0.689026	7
4h_c1_881_1.5	HSP70.2	24.2493	4	OURT88/1	Virulent	1	0.43393	-1.20447	6
4h_c1_881_1.5	CASP3	15.8443	4	OURT88/1	Virulent	1	0.587559	-0.767194	1
4h_c1_881_1.5	CXCL2	12.7074	4	OURT88/1	Virulent	1	0.331577	-1.59258	3
4h_c1_881_1.5	IFNAR1	15.3879	4	OURT88/1	Virulent	1	0.525187	-0.929096	1
4h_c1_881_1.5	IL1B	15.9452	4	OURT88/1	Virulent	1	0.503651	-0.989503	2
4h_c1_881_1.5	IRF3	16.3976	4	OURT88/1	Virulent	1	0.566397	-0.820116	1
4h_c1_881_1.5	MX1	16.9438	4	OURT88/1	Virulent	1	0.702816	-0.508781	6
4h_c1_881_1.5	SCNN1B	999	4	OURT88/1	Virulent	1	1.66156e-199	-660.331
4h_c1_881_1.5	TLR3	17.4729	4	OURT88/1	Virulent	1	0.635137	-0.654861	8
4h_c1_881_1.5	VNN2	14.8161	4	OURT88/1	Virulent	1	2.7466	1.45764	7
4h_c1_881_1.5	SIGLEC1	14.3217	4	OURT88/1	Virulent	1	0.738104	-0.438104	1
4h_c1_881_1.5	BANF1	12.7878	4	OURT88/1	Virulent	1	0.995478	-0.00653821	1
4h_c1_881_1.5	SOCS3	22.3608	4	OURT88/1	Virulent	1	1.46015e+196	651.644
4h_c1_881_1.5	CCL2	16.5972	4	OURT88/1	Virulent	1	0.601166	-0.734164	3
4h_c1_881_1.5	CXCL8	12.3733	4	OURT88/1	Virulent	1	0.587978	-0.766165	3
4h_c1_881_1.5	IL1RN	17.0425	4	OURT88/1	Virulent	1	1.48364	0.569144	5
4h_c1_881_1.5	ISG15	15.9163	4	OURT88/1	Virulent	1	0.635637	-0.653724	6
4h_c1_881_1.5	MYD88	13.819	4	OURT88/1	Virulent	1	0.673332	-0.570611	1
4h_c1_881_1.5	SIKE1	17.3712	4	OURT88/1	Virulent	1	0.557488	-0.842987	7
4h_c1_881_1.5	TLR4	12.9286	4	OURT88/1	Virulent	1	0.73513	-0.44393	1
4h_c1_881_1.5	RAB1B	14.8013	4	OURT88/1	Virulent	1	0.810876	-0.302446	1
4h_c1_881_1.5	AXL	15.447	4	OURT88/1	Virulent	1	0.968784	-0.045753	5
4h_c1_881_1.5	OAS1	13.0997	4	OURT88/1	Virulent	1	0.862694	-0.213079	5
4h_c1_881_1.5	TLR5	999	4	OURT88/1	Virulent	1	1.89124e-297	-985.693
4h_c1_881_1.5	CCL20	21.5674	4	OURT88/1	Virulent	1	1.7913	0.841009	3
4h_c1_881_1.5	DDIT3	15.8785	4	OURT88/1	Virulent	1	0.599128	-0.739063	1
4h_c1_881_1.5	IFNG	22.8312	4	OURT88/1	Virulent	1	0.331636	-1.59233
4h_c1_881_1.5	IL23	19.6448	4	OURT88/1	Virulent	1	1.26988	0.344695	2
4h_c1_881_1.5	KDM6B	16.5789	4	OURT88/1	Virulent	1	0.836833	-0.256988	1
4h_c1_881_1.5	NFKB1	13.6632	4	OURT88/1	Virulent	1	0.42552	-1.2327	5
4h_c1_881_1.5	STAT2	15.7357	4	OURT88/1	Virulent	1	0.717022	-0.47991	5
4h_c1_881_1.5	TLR7	15.2087	4	OURT88/1	Virulent	1	1.28542	0.362239	7
4h_c1_881_1.5	SLA-DMB	13.4321	4	OURT88/1	Virulent	1	0.912472	-0.132147	1
4h_c1_881_1.5	ZBP1	16.8074	4	OURT88/1	Virulent	1	0.961878	-0.0560744	6
4h_c1_881_1.5	CXCL9	999	4	OURT88/1	Virulent	1	0.000931796	-10.0677
4h_c1_881_1.5	CGAS	18.2225	4	OURT88/1	Virulent	1	0.300032	-1.73681	5
4h_c1_881_1.5	NFKBIE	15.6196	4	OURT88/1	Virulent	1	0.991555	-0.0122353	1
4h_c1_881_1.5	MAP3K7	17.3294	4	OURT88/1	Virulent	1	0.734129	-0.445894	1
4h_c1_881_1.5	IL27	19.4827	4	OURT88/1	Virulent	1	0.950427	-0.0733525	8
4h_c1_881_1.5	IFNGR1	13.3623	4	OURT88/1	Virulent	1	0.86523	-0.208845	1
4h_c1_881_1.5	EIF2AK2	15.299	4	OURT88/1	Virulent	1	0.682977	-0.550091	6
4h_c1_881_1.5	CCL4	14.9217	4	OURT88/1	Virulent	1	2.58596	1.3707	3
4h_c1_881_1.5	SLA-DMA	13.5203	4	OURT88/1	Virulent	1	0.780645	-0.357261	1
4h_c1_881_1.5	CXCL10	18.6912	4	OURT88/1	Virulent	1	0.914431	-0.129054	6
4h_c1_881_1.5	CD163	11.0323	4	OURT88/1	Virulent	1	0.989738	-0.0148815	1
4h_c1_881_1.5	PKR	15.0598	4	OURT88/1	Virulent	1	0.729165	-0.455682
4h_c1_881_1.5	TNF	17.9803	4	OURT88/1	Virulent	1	0.621385	-0.68644	6
4h_c1_881_1.5	TBK1	15.2351	4	OURT88/1	Virulent	1	0.727396	-0.459186	1
4h_c1_881_1.5	NFKBIZ	14.9531	4	OURT88/1	Virulent	1	0.478693	-1.06283	8
4h_c1_881_1.5	MAPK1	13.6937	4	OURT88/1	Virulent	1	0.895361	-0.159459	1
4h_c1_881_1.5	IL4R	14.2909	4	OURT88/1	Virulent	1	0.605393	-0.724056	1
4h_c1_881_1.5	IL10	20.6772	4	OURT88/1	Virulent	1	1.72668e+98	326.337
4h_c1_881_1.5	HSPA5	11.5963	4	OURT88/1	Virulent	1	1.65612	0.727811	5
4h_c1_881_1.5	CD14	16.0226	4	OURT88/1	Virulent	1	1.12514	0.170105	1
4h_c1_881_1.5	PRKDC	20.1573	4	OURT88/1	Virulent	1	1.69987	0.765428	4
4h_c1_881_1.5	B2M	8.21923	4	OURT88/1	Virulent	1	0.98619	-0.0200619	3
4h_c1_881_1.5	TIMD4	999	4	OURT88/1	Virulent	1	0.000931796	-10.0677
4h_c1_881_1.5	IFI16	20.6516	4	OURT88/1	Virulent	1	0.363256	-1.46094	8
4h_c1_881_1.5	TNFAIP3	13.4891	4	OURT88/1	Virulent	1	1.0358	0.0507453	5
4h_c1_881_1.5	TGFB1	12.5326	4	OURT88/1	Virulent	1	0.821174	-0.284239	1
4h_c1_881_1.5	PBD-2	999	4	OURT88/1	Virulent	1	0.000931796	-10.0677
4h_c1_881_1.5	MAVS	18.4094	4	OURT88/1	Virulent	1	0.456652	-1.13083	1
4h_c1_881_1.5	IL7	19.642	4	OURT88/1	Virulent	1	0.286695	-1.80241	7
4h_c1_881_1.5	IL16	16.5225	4	OURT88/1	Virulent	1	0.620532	-0.688424	7
4h_c1_881_1.5	IFNB1	21.9196	4	OURT88/1	Virulent	1	2.27452	1.18556	6
4h_c1_881_1.5	CD4	999	4	OURT88/1	Virulent	1	8.45853e-200	-661.305
4h_c1_881_1.5	TLR9	22.6643	4	OURT88/1	Virulent	1	9.99194e+97	325.548
4h_c1_881_1.5	GAPDH	9.43062	4	OURT88/1	Virulent	1	1.03733	0.0528756
4h_c1_881_1.5	NLRP3	22.2841	4	OURT88/1	Virulent	1	0.806063	-0.311035	2
4h_c1_881_1.5	SLFN11	18.2303	4	OURT88/1	Virulent	1	0.663776	-0.591231	6
4h_c1_881_1.5	TNFS10	17.2541	4	OURT88/1	Virulent	1	2.12367	1.08656	6
4h_c1_881_1.5	TGFBR1	14.1284	4	OURT88/1	Virulent	1	0.89432	-0.161138	1
4h_c1_881_1.5	RIGI	16.107	4	OURT88/1	Virulent	1	0.538002	-0.894316	6
4h_c1_881_1.5	MCU	18.8056	4	OURT88/1	Virulent	1	0.928689	-0.106732	4
4h_c1_881_1.5	IRAK1	16.1077	4	OURT88/1	Virulent	1	1.02137	0.030509	1
4h_c1_881_1.5	IL18	14.8054	4	OURT88/1	Virulent	1	1.46905	0.554887	7
4h_c1_881_1.5	IFIT1	17.2444	4	OURT88/1	Virulent	1	0.642886	-0.637365	6
4h_c1_881_1.5	CSF2	19.2578	4	OURT88/1	Virulent	1	0.728393	-0.45721	2
4h_c1_881_1.5	SOD2	10.1043	4	OURT88/1	Virulent	1	1.07386	0.102808	1
4h_c1_881_1.5	RPL19	10.7125	4	OURT88/1	Virulent	1	0.989206	-0.0156569
4h_c1_881_1.5	SNX32	999	4	OURT88/1	Virulent	1	2.23215e-200	-663.227
4h_c1_881_1.5	RXFAP	18.7524	4	OURT88/1	Virulent	1	0.64838	-0.625089	1
4h_c1_881_1.5	UNC93B1	13.8016	4	OURT88/1	Virulent	1	0.744286	-0.42607	6
4h_c1_881_1.5	TGIF2	19.1842	4	OURT88/1	Virulent	1	0.682908	-0.550237	8
48h_c2_L60_0.5	C3	15.2611	48	L60	Virulent	2	0.747779	-0.419316	1
48h_c2_L60_0.5	CSF3	22.5698	48	L60	Virulent	2	2.99396	1.58206	2
48h_c2_L60_0.5	IL1A	19.1858	48	L60	Virulent	2	0.2341	-2.09481	3
48h_c2_L60_0.5	IRAK4	18.2938	48	L60	Virulent	2	1.06	0.0840704	1
48h_c2_L60_0.5	IFNA1	999	48	L60	Virulent	2	6.15214e-298	-987.313	4
48h_c2_L60_0.5	SAMHD1	20.7858	48	L60	Virulent	2	0.440652	-1.18229	5
48h_c2_L60_0.5	TIMP1	20.9118	48	L60	Virulent	2	0.950584	-0.0731133	2
48h_c2_L60_0.5	RSAD2	22.28	48	L60	Virulent	2	0.532158	-0.910072	6
48h_c2_L60_0.5	CIITA	22.2928	48	L60	Virulent	2	0.129837	-2.94522	1
48h_c2_L60_0.5	STING	999	48	L60	Virulent	2	3.82083e-299	-991.323	7
48h_c2_L60_0.5	HSP70.2	27.1123	48	L60	Virulent	2	0.778625	-0.360999	6
48h_c2_L60_0.5	CASP3	20.2327	48	L60	Virulent	2	0.366239	-1.44914	1
48h_c2_L60_0.5	CXCL2	16.407	48	L60	Virulent	2	0.333156	-1.58573	3
48h_c2_L60_0.5	IFNAR1	21.5977	48	L60	Virulent	2	0.0926239	-3.43247	1
48h_c2_L60_0.5	IL1B	19.9455	48	L60	Virulent	2	0.410848	-1.28332	2
48h_c2_L60_0.5	IRF3	24.1518	48	L60	Virulent	2	0.0342492	-4.86779	1
48h_c2_L60_0.5	MX1	999	48	L60	Virulent	2	1.53686e-299	-992.637	6
48h_c2_L60_0.5	SCNN1B	999	48	L60	Virulent	2	1.66156e-199	-660.331
48h_c2_L60_0.5	TLR3	20.3684	48	L60	Virulent	2	1.11432	0.156168	8
48h_c2_L60_0.5	VNN2	25.1396	48	L60	Virulent	2	0.0279806	-5.15943	7
48h_c2_L60_0.5	SIGLEC1	25.8569	48	L60	Virulent	2	0.00324683	-8.26675	1
48h_c2_L60_0.5	BANF1	16.7465	48	L60	Virulent	2	0.835851	-0.258682	1
48h_c2_L60_0.5	SOCS3	999	48	L60	Virulent	2	1.36408e-101	-335.067
48h_c2_L60_0.5	CCL2	20.0881	48	L60	Virulent	2	0.698069	-0.518558	3
48h_c2_L60_0.5	CXCL8	15.2935	48	L60	Virulent	2	1.01407	0.0201539	3
48h_c2_L60_0.5	IL1RN	999	48	L60	Virulent	2	3.47385e-299	-991.46	5
48h_c2_L60_0.5	ISG15	23.9905	48	L60	Virulent	2	0.0307908	-5.02136	6
48h_c2_L60_0.5	MYD88	23.6883	48	L60	Virulent	2	0.0093977	-6.73348	1
48h_c2_L60_0.5	SIKE1	999	48	L60	Virulent	2	1.6394e-299	-992.543	7
48h_c2_L60_0.5	TLR4	22.3549	48	L60	Virulent	2	0.0139486	-6.16374	1
48h_c2_L60_0.5	RAB1B	999	48	L60	Virulent	2	4.01582e-300	-994.573	1
48h_c2_L60_0.5	AXL	23.2907	48	L60	Virulent	2	0.0550554	-4.18297	5
48h_c2_L60_0.5	OAS1	22.8763	48	L60	Virulent	2	0.0128399	-6.28322	5
48h_c2_L60_0.5	TLR5	999	48	L60	Virulent	2	1.89124e-297	-985.693
48h_c2_L60_0.5	CCL20	23.5218	48	L60	Virulent	2	6.03421	2.59316	3
48h_c2_L60_0.5	DDIT3	20.7103	48	L60	Virulent	2	0.274659	-1.86429	1
48h_c2_L60_0.5	IFNG	24.6227	48	L60	Virulent	2	1.2506	0.322622
48h_c2_L60_0.5	IL23	22.054	48	L60	Virulent	2	3.12103	1.64202	2
48h_c2_L60_0.5	KDM6B	24.184	48	L60	Virulent	2	0.0561105	-4.15559	1
48h_c2_L60_0.5	NFKB1	19.828	48	L60	Virulent	2	0.0774313	-3.69094	5
48h_c2_L60_0.5	STAT2	22.6299	48	L60	Virulent	2	0.0786918	-3.66764	5
48h_c2_L60_0.5	TLR7	999	48	L60	Virulent	2	8.44328e-300	-993.501	7
48h_c2_L60_0.5	SLA-DMB	18.7499	48	L60	Virulent	2	0.298654	-1.74345	1
48h_c2_L60_0.5	ZBP1	999	48	L60	Virulent	2	1.91358e-299	-992.32	6
48h_c2_L60_0.5	CXCL9	999	48	L60	Virulent	2	0.000931796	-10.0677
48h_c2_L60_0.5	CGAS	24.7273	48	L60	Virulent	2	0.0431295	-4.53518	5
48h_c2_L60_0.5	NFKBIE	999	48	L60	Virulent	2	8.65901e-300	-993.464	1
48h_c2_L60_0.5	MAP3K7	22.2042	48	L60	Virulent	2	0.326646	-1.6142	1
48h_c2_L60_0.5	IL27	999	48	L60	Virulent	2	1.20773e-298	-989.662	8
48h_c2_L60_0.5	IFNGR1	19.0388	48	L60	Virulent	2	0.220844	-2.1789	1
48h_c2_L60_0.5	EIF2AK2	18.2387	48	L60	Virulent	2	1.1621	0.216739	6
48h_c2_L60_0.5	CCL4	21.7337	48	L60	Virulent	2	0.300467	-1.73472	3
48h_c2_L60_0.5	SLA-DMA	20.5579	48	L60	Virulent	2	0.0775677	-3.6884	1
48h_c2_L60_0.5	CXCL10	999	48	L60	Virulent	2	6.71369e-299	-990.509	6
48h_c2_L60_0.5	CD163	19.1442	48	L60	Virulent	2	0.0467039	-4.42031	1
48h_c2_L60_0.5	PKR	18.2499	48	L60	Virulent	2	1.04298	0.0607148
48h_c2_L60_0.5	TNF	20.4378	48	L60	Virulent	2	1.47688	0.562554	6
48h_c2_L60_0.5	TBK1	20.4459	48	L60	Virulent	2	0.256403	-1.96352	1
48h_c2_L60_0.5	NFKBIZ	999	48	L60	Virulent	2	2.63374e-300	-995.181	8
48h_c2_L60_0.5	MAPK1	19.9833	48	L60	Virulent	2	0.149418	-2.74258	1
48h_c2_L60_0.5	IL4R	999	48	L60	Virulent	2	2.10487e-300	-995.505	1
48h_c2_L60_0.5	IL10	999	48	L60	Virulent	2	5.02176e-200	-662.057
48h_c2_L60_0.5	HSPA5	18.0047	48	L60	Virulent	2	0.254543	-1.97402	5
48h_c2_L60_0.5	CD14	27.73	48	L60	Virulent	2	0.00439234	-7.83079	1
48h_c2_L60_0.5	PRKDC	999	48	L60	Virulent	2	3.44779e-298	-988.149	4
48h_c2_L60_0.5	B2M	11.4974	48	L60	Virulent	2	1.32707	0.408249	3
48h_c2_L60_0.5	TIMD4	999	48	L60	Virulent	2	0.000931796	-10.0677
48h_c2_L60_0.5	IFI16	23.3425	48	L60	Virulent	2	0.734399	-0.445364	8
48h_c2_L60_0.5	TNFAIP3	19.6608	48	L60	Virulent	2	0.187581	-2.41441	5
48h_c2_L60_0.5	TGFB1	19.0757	48	L60	Virulent	2	0.114952	-3.12089	1
48h_c2_L60_0.5	PBD-2	999	48	L60	Virulent	2	0.000931796	-10.0677
48h_c2_L60_0.5	MAVS	999	48	L60	Virulent	2	2.75775e-299	-991.793	1
48h_c2_L60_0.5	IL7	999	48	L60	Virulent	2	4.06863e-299	-991.232	7
48h_c2_L60_0.5	IL16	999	48	L60	Virulent	2	1.01325e-299	-993.238	7
48h_c2_L60_0.5	IFNB1	23.448	48	L60	Virulent	2	10.2938	3.3637	6
48h_c2_L60_0.5	CD4	999	48	L60	Virulent	2	8.45853e-200	-661.305
48h_c2_L60_0.5	TLR9	999	48	L60	Virulent	2	1.15207e-199	-660.859
48h_c2_L60_0.5	GAPDH	13.6245	48	L60	Virulent	2	0.739947	-0.434505
48h_c2_L60_0.5	NLRP3	999	48	L60	Virulent	2	7.1408e-298	-987.098	2
48h_c2_L60_0.5	SLFN11	999	48	L60	Virulent	2	3.5407e-299	-991.432	6
48h_c2_L60_0.5	TNFS10	23.2349	48	L60	Virulent	2	0.438986	-1.18775	6
48h_c2_L60_0.5	TGFBR1	23.2167	48	L60	Virulent	2	0.0214499	-5.54289	1
48h_c2_L60_0.5	RIGI	21.7759	48	L60	Virulent	2	0.138051	-2.85673	6
48h_c2_L60_0.5	MCU	999	48	L60	Virulent	2	7.38062e-299	-990.373	4
48h_c2_L60_0.5	IRAK1	999	48	L60	Virulent	2	1.25102e-299	-992.933	1
48h_c2_L60_0.5	IL18	19.8786	48	L60	Virulent	2	0.569647	-0.811861	7
48h_c2_L60_0.5	IFIT1	23.5207	48	L60	Virulent	2	0.10828	-3.20716	6
48h_c2_L60_0.5	CSF2	23.1532	48	L60	Virulent	2	0.638996	-0.646121	2
48h_c2_L60_0.5	SOD2	17.2478	48	L60	Virulent	2	0.0991514	-3.33422	1
48h_c2_L60_0.5	RPL19	13.9317	48	L60	Virulent	2	1.38677	0.471724
48h_c2_L60_0.5	SNX32	21.8202	48	L60	Virulent	2	4.5371e+98	327.731
48h_c2_L60_0.5	RXFAP	999	48	L60	Virulent	2	4.96664e-299	-990.944	1
48h_c2_L60_0.5	UNC93B1	20.8106	48	L60	Virulent	2	0.0754388	-3.72855	6
48h_c2_L60_0.5	TGIF2	999	48	L60	Virulent	2	7.05611e-299	-990.438	8
24h_c2_883_0.5	C3	12.1291	24	OURT88/3	Attenuated	2	0.660403	-0.598582	1
24h_c2_883_0.5	CSF3	20.5279	24	OURT88/3	Attenuated	2	1.24199	0.312652	2
24h_c2_883_0.5	IL1A	14.7775	24	OURT88/3	Attenuated	2	0.50074	-0.997866	3
24h_c2_883_0.5	IRAK4	15.5846	24	OURT88/3	Attenuated	2	0.698288	-0.518105	1
24h_c2_883_0.5	IFNA1	22.0389	24	OURT88/3	Attenuated	2	1.08249	0.114348	4
24h_c2_883_0.5	SAMHD1	17.4423	24	OURT88/3	Attenuated	2	0.450589	-1.15012	5
24h_c2_883_0.5	TIMP1	17.6358	24	OURT88/3	Attenuated	2	0.927648	-0.108351	2
24h_c2_883_0.5	RSAD2	15.0774	24	OURT88/3	Attenuated	2	7.89656	2.98122	6
24h_c2_883_0.5	CIITA	17.4637	24	OURT88/3	Attenuated	2	0.371787	-1.42745	1
24h_c2_883_0.5	STING	20.5234	24	OURT88/3	Attenuated	2	0.192208	-2.37926	7
24h_c2_883_0.5	HSP70.2	18.1921	24	OURT88/3	Attenuated	2	37.9995	5.24791	6
24h_c2_883_0.5	CASP3	16.9684	24	OURT88/3	Attenuated	2	0.354495	-1.49616	1
24h_c2_883_0.5	CXCL2	12.6521	24	OURT88/3	Attenuated	2	0.453101	-1.14209	3
24h_c2_883_0.5	IFNAR1	16.2696	24	OURT88/3	Attenuated	2	0.374852	-1.41561	1
24h_c2_883_0.5	IL1B	17.4071	24	OURT88/3	Attenuated	2	0.240449	-2.0562	2
24h_c2_883_0.5	IRF3	16.7627	24	OURT88/3	Attenuated	2	0.578354	-0.789975	1
24h_c2_883_0.5	MX1	15.3258	24	OURT88/3	Attenuated	2	2.83722	1.50448	6
24h_c2_883_0.5	SCNN1B	999	24	OURT88/3	Attenuated	2	1.66156e-199	-660.331
24h_c2_883_0.5	TLR3	17.0839	24	OURT88/3	Attenuated	2	1.0938	0.129354	8
24h_c2_883_0.5	VNN2	17.8892	24	OURT88/3	Attenuated	2	0.429185	-1.22033	7
24h_c2_883_0.5	SIGLEC1	14.3252	24	OURT88/3	Attenuated	2	0.968341	-0.0464132	1
24h_c2_883_0.5	BANF1	13.4677	24	OURT88/3	Attenuated	2	0.817221	-0.291202	1
24h_c2_883_0.5	SOCS3	999	24	OURT88/3	Attenuated	2	1.36408e-101	-335.067
24h_c2_883_0.5	CCL2	16.2656	24	OURT88/3	Attenuated	2	0.994895	-0.00738432	3
24h_c2_883_0.5	CXCL8	12.3566	24	OURT88/3	Attenuated	2	0.782292	-0.354221	3
24h_c2_883_0.5	IL1RN	17.8825	24	OURT88/3	Attenuated	2	1.09001	0.124341	5
24h_c2_883_0.5	ISG15	14.3725	24	OURT88/3	Attenuated	2	2.43739	1.28534	6
24h_c2_883_0.5	MYD88	14.6958	24	OURT88/3	Attenuated	2	0.482224	-1.05222	1
24h_c2_883_0.5	SIKE1	17.0897	24	OURT88/3	Attenuated	2	0.891169	-0.166229	7
24h_c2_883_0.5	TLR4	14.6685	24	OURT88/3	Attenuated	2	0.289448	-1.78862	1
24h_c2_883_0.5	RAB1B	15.4991	24	OURT88/3	Attenuated	2	0.657441	-0.605067	1
24h_c2_883_0.5	AXL	17.608	24	OURT88/3	Attenuated	2	0.284879	-1.81158	5
24h_c2_883_0.5	OAS1	14.4792	24	OURT88/3	Attenuated	2	0.436046	-1.19745	5
24h_c2_883_0.5	TLR5	26.1557	24	OURT88/3	Attenuated	2	0.191812	-2.38224
24h_c2_883_0.5	CCL20	22.4523	24	OURT88/3	Attenuated	2	1.27574	0.351332	3
24h_c2_883_0.5	DDIT3	16.3523	24	OURT88/3	Attenuated	2	0.567378	-0.817618	1
24h_c2_883_0.5	IFNG	23.1002	24	OURT88/3	Attenuated	2	0.361947	-1.46615
24h_c2_883_0.5	IL23	20.4398	24	OURT88/3	Attenuated	2	0.962544	-0.0550761	2
24h_c2_883_0.5	KDM6B	18.2067	24	OURT88/3	Attenuated	2	0.356103	-1.48963	1
24h_c2_883_0.5	NFKB1	13.9362	24	OURT88/3	Attenuated	2	0.463152	-1.11044	5
24h_c2_883_0.5	STAT2	16.7409	24	OURT88/3	Attenuated	2	0.469789	-1.08991	5
24h_c2_883_0.5	TLR7	17.2796	24	OURT88/3	Attenuated	2	0.402366	-1.31342	7
24h_c2_883_0.5	SLA-DMB	14.6901	24	OURT88/3	Attenuated	2	0.501735	-0.995001	1
24h_c2_883_0.5	ZBP1	16.0813	24	OURT88/3	Attenuated	2	2.09248	1.06522	6
24h_c2_883_0.5	CXCL9	999	24	OURT88/3	Attenuated	2	0.000931796	-10.0677
24h_c2_883_0.5	CGAS	18.572	24	OURT88/3	Attenuated	2	0.309669	-1.6912	5
24h_c2_883_0.5	NFKBIE	17.0399	24	OURT88/3	Attenuated	2	0.487232	-1.03732	1
24h_c2_883_0.5	MAP3K7	17.7871	24	OURT88/3	Attenuated	2	0.70298	-0.508444	1
24h_c2_883_0.5	IL27	21.3846	24	OURT88/3	Attenuated	2	0.334453	-1.58013	8
24h_c2_883_0.5	IFNGR1	14.4678	24	OURT88/3	Attenuated	2	0.528796	-0.919216	1
24h_c2_883_0.5	EIF2AK2	14.1684	24	OURT88/3	Attenuated	2	1.96655	0.975667	6
24h_c2_883_0.5	CCL4	15.2226	24	OURT88/3	Attenuated	2	2.7608	1.46509	3
24h_c2_883_0.5	SLA-DMA	15.0788	24	OURT88/3	Attenuated	2	0.348542	-1.5206	1
24h_c2_883_0.5	CXCL10	18.5245	24	OURT88/3	Attenuated	2	1.34995	0.432901	6
24h_c2_883_0.5	CD163	13.1103	24	OURT88/3	Attenuated	2	0.308292	-1.69763	1
24h_c2_883_0.5	PKR	14.0268	24	OURT88/3	Attenuated	2	1.96235	0.972583
24h_c2_883_0.5	TNF	17.399	24	OURT88/3	Attenuated	2	1.22266	0.290026	6
24h_c2_883_0.5	TBK1	16.419	24	OURT88/3	Attenuated	2	0.421044	-1.24796	1
24h_c2_883_0.5	NFKBIZ	16.6305	24	OURT88/3	Attenuated	2	0.196826	-2.34501	8
24h_c2_883_0.5	MAPK1	13.8615	24	OURT88/3	Attenuated	2	1.04824	0.067963	1
24h_c2_883_0.5	IL4R	15.7963	24	OURT88/3	Attenuated	2	0.280453	-1.83417	1
24h_c2_883_0.5	IL10	999	24	OURT88/3	Attenuated	2	5.02176e-200	-662.057
24h_c2_883_0.5	HSPA5	13.1255	24	OURT88/3	Attenuated	2	0.754635	-0.406149	5
24h_c2_883_0.5	CD14	17.2853	24	OURT88/3	Attenuated	2	0.616678	-0.697411	1
24h_c2_883_0.5	PRKDC	23.9652	24	OURT88/3	Attenuated	2	0.159614	-2.64734	4
24h_c2_883_0.5	B2M	8.54112	24	OURT88/3	Attenuated	2	1.03759	0.0532384	3
24h_c2_883_0.5	TIMD4	999	24	OURT88/3	Attenuated	2	0.000931796	-10.0677
24h_c2_883_0.5	IFI16	20.6832	24	OURT88/3	Attenuated	2	0.467361	-1.09739	8
24h_c2_883_0.5	TNFAIP3	14.2264	24	OURT88/3	Attenuated	2	0.817125	-0.291372	5
24h_c2_883_0.5	TGFB1	12.8442	24	OURT88/3	Attenuated	2	0.870118	-0.200717	1
24h_c2_883_0.5	PBD-2	999	24	OURT88/3	Attenuated	2	0.000931796	-10.0677
24h_c2_883_0.5	MAVS	18.8944	24	OURT88/3	Attenuated	2	0.429095	-1.22063	1
24h_c2_883_0.5	IL7	18.24	24	OURT88/3	Attenuated	2	0.99642	-0.00517357	7
24h_c2_883_0.5	IL16	18.4632	24	OURT88/3	Attenuated	2	0.21258	-2.23392	7
24h_c2_883_0.5	IFNB1	17.7052	24	OURT88/3	Attenuated	2	55.5304	5.79521	6
24h_c2_883_0.5	CD4	999	24	OURT88/3	Attenuated	2	8.45853e-200	-661.305
24h_c2_883_0.5	TLR9	21.6946	24	OURT88/3	Attenuated	2	2.57351e+98	326.913
24h_c2_883_0.5	GAPDH	9.67821	24	OURT88/3	Attenuated	2	1.14908	0.200477
24h_c2_883_0.5	NLRP3	21.838	24	OURT88/3	Attenuated	2	1.44422	0.530289	2
24h_c2_883_0.5	SLFN11	18.45	24	OURT88/3	Attenuated	2	0.749675	-0.415664	6
24h_c2_883_0.5	TNFS10	19.0902	24	OURT88/3	Attenuated	2	0.782225	-0.354344	6
24h_c2_883_0.5	TGFBR1	15.3168	24	OURT88/3	Attenuated	2	0.51611	-0.95425	1
24h_c2_883_0.5	RIGI	15.1927	24	OURT88/3	Attenuated	2	1.33346	0.415173	6
24h_c2_883_0.5	MCU	18.9908	24	OURT88/3	Attenuated	2	1.07416	0.103215	4
24h_c2_883_0.5	IRAK1	16.846	24	OURT88/3	Attenuated	2	0.805175	-0.312625	1
24h_c2_883_0.5	IL18	17.8018	24	OURT88/3	Attenuated	2	0.242094	-2.04636	7
24h_c2_883_0.5	IFIT1	15.8771	24	OURT88/3	Attenuated	2	2.18126	1.12516	6
24h_c2_883_0.5	CSF2	20.4501	24	OURT88/3	Attenuated	2	0.41918	-1.25436	2
24h_c2_883_0.5	SOD2	11.5263	24	OURT88/3	Attenuated	2	0.527045	-0.924001	1
24h_c2_883_0.5	RPL19	11.2553	24	OURT88/3	Attenuated	2	0.893006	-0.163258
24h_c2_883_0.5	SNX32	18.8905	24	OURT88/3	Attenuated	2	3.48246e+98	327.349
24h_c2_883_0.5	RXFAP	18.9929	24	OURT88/3	Attenuated	2	0.72178	-0.470369	1
24h_c2_883_0.5	UNC93B1	14.0036	24	OURT88/3	Attenuated	2	0.850935	-0.232879	6
24h_c2_883_0.5	TGIF2	20.1192	24	OURT88/3	Attenuated	2	0.469753	-1.09002	8
24h_c3_L60_1.5	C3	11.857	24	L60	Virulent	3	1.32454	0.405488	1
24h_c3_L60_1.5	CSF3	23.2167	24	L60	Virulent	3	0.319928	-1.64418	2
24h_c3_L60_1.5	IL1A	16.1479	24	L60	Virulent	3	0.321695	-1.63623	3
24h_c3_L60_1.5	IRAK4	15.6675	24	L60	Virulent	3	1.09505	0.131003	1
24h_c3_L60_1.5	IFNA1	27.5292	24	L60	Virulent	3	0.0399965	-4.64398	4
24h_c3_L60_1.5	SAMHD1	17.4142	24	L60	Virulent	3	0.763127	-0.390004	5
24h_c3_L60_1.5	TIMP1	21.4762	24	L60	Virulent	3	0.107557	-3.21682	2
24h_c3_L60_1.5	RSAD2	17.6452	24	L60	Virulent	3	2.21212	1.14543	6
24h_c3_L60_1.5	CIITA	16.7035	24	L60	Virulent	3	1.04588	0.0647189	1
24h_c3_L60_1.5	STING	999	24	L60	Virulent	3	3.82083e-299	-991.323	7
24h_c3_L60_1.5	HSP70.2	23.9202	24	L60	Virulent	3	1.19061	0.251703	6
24h_c3_L60_1.5	CASP3	17.2358	24	L60	Virulent	3	0.489178	-1.03157	1
24h_c3_L60_1.5	CXCL2	13.9585	24	L60	Virulent	3	0.304273	-1.71656	3
24h_c3_L60_1.5	IFNAR1	16.5013	24	L60	Virulent	3	0.530203	-0.915382	1
24h_c3_L60_1.5	IL1B	18.1302	24	L60	Virulent	3	0.241928	-2.04735	2
24h_c3_L60_1.5	IRF3	16.6586	24	L60	Virulent	3	1.03244	0.0460644	1
24h_c3_L60_1.5	MX1	16.1349	24	L60	Virulent	3	2.68949	1.42733	6
24h_c3_L60_1.5	SCNN1B	24.6391	24	L60	Virulent	3	8.00838e+97	325.229
24h_c3_L60_1.5	TLR3	20.1585	24	L60	Virulent	3	0.215637	-2.21332	8
24h_c3_L60_1.5	VNN2	20.6257	24	L60	Virulent	3	0.106962	-3.22484	7
24h_c3_L60_1.5	SIGLEC1	14.5825	24	L60	Virulent	3	1.34559	0.428238	1
24h_c3_L60_1.5	BANF1	14.1863	24	L60	Virulent	3	0.824804	-0.277877	1
24h_c3_L60_1.5	SOCS3	999	24	L60	Virulent	3	1.36408e-101	-335.067
24h_c3_L60_1.5	CCL2	18.639	24	L60	Virulent	3	0.318914	-1.64876	3
24h_c3_L60_1.5	CXCL8	14.1498	24	L60	Virulent	3	0.374876	-1.41551	3
24h_c3_L60_1.5	IL1RN	18.9259	24	L60	Virulent	3	0.878347	-0.187137	5
24h_c3_L60_1.5	ISG15	15.2483	24	L60	Virulent	3	2.20601	1.14144	6
24h_c3_L60_1.5	MYD88	14.7109	24	L60	Virulent	3	0.792571	-0.335387	1
24h_c3_L60_1.5	SIKE1	17.6568	24	L60	Virulent	3	0.999028	-0.00140329	7
24h_c3_L60_1.5	TLR4	15.0711	24	L60	Virulent	3	0.363681	-1.45925	1
24h_c3_L60_1.5	RAB1B	16.119	24	L60	Virulent	3	0.710564	-0.492964	1
24h_c3_L60_1.5	AXL	17.3137	24	L60	Virulent	3	0.580232	-0.785299	5
24h_c3_L60_1.5	OAS1	14.1214	24	L60	Virulent	3	0.928086	-0.107669	5
24h_c3_L60_1.5	TLR5	999	24	L60	Virulent	3	1.89124e-297	-985.693
24h_c3_L60_1.5	CCL20	999	24	L60	Virulent	3	9.65615e-298	-986.663	3
24h_c3_L60_1.5	DDIT3	16.7125	24	L60	Virulent	3	0.734145	-0.445863	1
24h_c3_L60_1.5	IFNG	999	24	L60	Virulent	3	4.29265e-298	-987.833
24h_c3_L60_1.5	IL23	23.015	24	L60	Virulent	3	0.268241	-1.8984	2
24h_c3_L60_1.5	KDM6B	17.3087	24	L60	Virulent	3	1.10222	0.140407	1
24h_c3_L60_1.5	NFKB1	14.7128	24	L60	Virulent	3	0.449023	-1.15514	5
24h_c3_L60_1.5	STAT2	16.9804	24	L60	Virulent	3	0.660907	-0.59748	5
24h_c3_L60_1.5	TLR7	18.4626	24	L60	Virulent	3	0.294328	-1.7645	7
24h_c3_L60_1.5	SLA-DMB	15.4995	24	L60	Virulent	3	0.475515	-1.07244	1
24h_c3_L60_1.5	ZBP1	17.4518	24	L60	Virulent	3	1.34412	0.426666	6
24h_c3_L60_1.5	CXCL9	999	24	L60	Virulent	3	0.000931796	-10.0677
24h_c3_L60_1.5	CGAS	18.4802	24	L60	Virulent	3	0.548145	-0.86737	5
24h_c3_L60_1.5	NFKBIE	17.163	24	L60	Virulent	3	0.743027	-0.428513	1
24h_c3_L60_1.5	MAP3K7	18.014	24	L60	Virulent	3	0.997675	-0.00335756	1
24h_c3_L60_1.5	IL27	22.4499	24	L60	Virulent	3	0.265461	-1.91343	8
24h_c3_L60_1.5	IFNGR1	14.5787	24	L60	Virulent	3	0.813308	-0.298127	1
24h_c3_L60_1.5	EIF2AK2	15.0485	24	L60	Virulent	3	1.77467	0.82755	6
24h_c3_L60_1.5	CCL4	18.2495	24	L60	Virulent	3	0.562571	-0.829894	3
24h_c3_L60_1.5	SLA-DMA	15.1764	24	L60	Virulent	3	0.541012	-0.886267	1
24h_c3_L60_1.5	CXCL10	19.4622	24	L60	Virulent	3	1.17051	0.227137	6
24h_c3_L60_1.5	CD163	13.7995	24	L60	Virulent	3	0.317564	-1.65488	1
24h_c3_L60_1.5	PKR	14.9595	24	L60	Virulent	3	1.7074	0.7718
24h_c3_L60_1.5	TNF	18.137	24	L60	Virulent	3	1.21762	0.284062	6
24h_c3_L60_1.5	TBK1	16.6096	24	L60	Virulent	3	0.612759	-0.706608	1
24h_c3_L60_1.5	NFKBIZ	16.9898	24	L60	Virulent	3	0.254834	-1.97237	8
24h_c3_L60_1.5	MAPK1	14.6465	24	L60	Virulent	3	1.01043	0.0149728	1
24h_c3_L60_1.5	IL4R	15.8482	24	L60	Virulent	3	0.449322	-1.15418	1
24h_c3_L60_1.5	IL10	999	24	L60	Virulent	3	5.02176e-200	-662.057
24h_c3_L60_1.5	HSPA5	13.8915	24	L60	Virulent	3	0.737047	-0.440171	5
24h_c3_L60_1.5	CD14	18.71	24	L60	Virulent	3	0.381537	-1.3901	1
24h_c3_L60_1.5	PRKDC	21.3388	24	L60	Virulent	3	1.63694	0.711004	4
24h_c3_L60_1.5	B2M	10.6038	24	L60	Virulent	3	0.412513	-1.27749	3
24h_c3_L60_1.5	TIMD4	999	24	L60	Virulent	3	0.000931796	-10.0677
24h_c3_L60_1.5	IFI16	22.3123	24	L60	Virulent	3	0.250946	-1.99455	8
24h_c3_L60_1.5	TNFAIP3	14.6298	24	L60	Virulent	3	1.02614	0.0372288	5
24h_c3_L60_1.5	TGFB1	13.5596	24	L60	Virulent	3	0.880179	-0.184131	1
24h_c3_L60_1.5	PBD-2	999	24	L60	Virulent	3	0.000931796	-10.0677
24h_c3_L60_1.5	MAVS	19.219	24	L60	Virulent	3	0.569079	-0.8133	1
24h_c3_L60_1.5	IL7	22.0908	24	L60	Virulent	3	0.114707	-3.12397	7
24h_c3_L60_1.5	IL16	17.9333	24	L60	Virulent	3	0.509771	-0.972078	7
24h_c3_L60_1.5	IFNB1	999	24	L60	Virulent	3	1.56509e-297	-985.966	6
24h_c3_L60_1.5	CD4	999	24	L60	Virulent	3	8.45853e-200	-661.305
24h_c3_L60_1.5	TLR9	999	24	L60	Virulent	3	1.15207e-199	-660.859
24h_c3_L60_1.5	GAPDH	10.4751	24	L60	Virulent	3	1.09854	0.13559
24h_c3_L60_1.5	NLRP3	999	24	L60	Virulent	3	7.1408e-298	-987.098	2
24h_c3_L60_1.5	SLFN11	20.5507	24	L60	Virulent	3	0.290288	-1.78444	6
24h_c3_L60_1.5	TNFS10	21.5681	24	L60	Virulent	3	0.233216	-2.10026	6
24h_c3_L60_1.5	TGFBR1	15.3104	24	L60	Virulent	3	0.860985	-0.215939	1
24h_c3_L60_1.5	RIGI	16.1303	24	L60	Virulent	3	1.15634	0.20956	6
24h_c3_L60_1.5	MCU	18.6101	24	L60	Virulent	3	2.32291	1.21593	4
24h_c3_L60_1.5	IRAK1	16.4815	24	L60	Virulent	3	1.72176	0.783888	1
24h_c3_L60_1.5	IL18	19.332	24	L60	Virulent	3	0.139217	-2.8446	7
24h_c3_L60_1.5	IFIT1	19.0441	24	L60	Virulent	3	0.40334	-1.30993	6
24h_c3_L60_1.5	CSF2	21.3832	24	L60	Virulent	3	0.364631	-1.45549	2
24h_c3_L60_1.5	SOD2	13.192	24	L60	Virulent	3	0.275902	-1.85777	1
24h_c3_L60_1.5	RPL19	11.9224	24	L60	Virulent	3	0.934087	-0.0983712
24h_c3_L60_1.5	SNX32	22.8151	24	L60	Virulent	3	3.80897e+97	324.156
24h_c3_L60_1.5	RXFAP	19.2962	24	L60	Virulent	3	0.971512	-0.0416967	1
24h_c3_L60_1.5	UNC93B1	14.6147	24	L60	Virulent	3	0.925303	-0.112003	6
24h_c3_L60_1.5	TGIF2	22.209	24	L60	Virulent	3	0.183277	-2.4479	8
72h_c1_881_1.5	C3	17.7145	72	OURT88/1	Virulent	1	0.207026	-2.27212	1
72h_c1_881_1.5	CSF3	21.8307	72	OURT88/1	Virulent	1	7.57755	2.92173	2
72h_c1_881_1.5	IL1A	19.3969	72	OURT88/1	Virulent	1	0.30665	-1.70533	3
72h_c1_881_1.5	IRAK4	19.3198	72	OURT88/1	Virulent	1	0.789303	-0.341349	1
72h_c1_881_1.5	IFNA1	999	72	OURT88/1	Virulent	1	6.15214e-298	-987.313	4
72h_c1_881_1.5	SAMHD1	20.8022	72	OURT88/1	Virulent	1	0.66061	-0.59813	5
72h_c1_881_1.5	TIMP1	19.7901	72	OURT88/1	Virulent	1	3.13669	1.64924	2
72h_c1_881_1.5	RSAD2	23.7214	72	OURT88/1	Virulent	1	0.297126	-1.75085	6
72h_c1_881_1.5	CIITA	19.9958	72	OURT88/1	Virulent	1	0.967487	-0.0476856	1
72h_c1_881_1.5	STING	19.8235	72	OURT88/1	Virulent	1	4.69981	2.2326	7
72h_c1_881_1.5	HSP70.2	28.2994	72	OURT88/1	Virulent	1	0.51854	-0.947474	6
72h_c1_881_1.5	CASP3	21.2385	72	OURT88/1	Virulent	1	0.276569	-1.85429	1
72h_c1_881_1.5	CXCL2	18.4243	72	OURT88/1	Virulent	1	0.124796	-3.00236	3
72h_c1_881_1.5	IFNAR1	20.174	72	OURT88/1	Virulent	1	0.376798	-1.40814	1
72h_c1_881_1.5	IL1B	999	72	OURT88/1	Virulent	1	5.512e-300	-994.116	2
72h_c1_881_1.5	IRF3	20.6103	72	OURT88/1	Virulent	1	0.604696	-0.725717	1
72h_c1_881_1.5	MX1	999	72	OURT88/1	Virulent	1	1.53686e-299	-992.637	6
72h_c1_881_1.5	SCNN1B	999	72	OURT88/1	Virulent	1	1.66156e-199	-660.331
72h_c1_881_1.5	TLR3	18.0314	72	OURT88/1	Virulent	1	8.53719	3.09376	8
72h_c1_881_1.5	VNN2	999	72	OURT88/1	Virulent	1	1.37424e-299	-992.798	7
72h_c1_881_1.5	SIGLEC1	19.6026	72	OURT88/1	Virulent	1	0.375814	-1.41191	1
72h_c1_881_1.5	BANF1	18.6293	72	OURT88/1	Virulent	1	0.343659	-1.54095	1
72h_c1_881_1.5	SOCS3	21.8825	72	OURT88/1	Virulent	1	4.02657e+197	656.429
72h_c1_881_1.5	CCL2	19.8765	72	OURT88/1	Virulent	1	1.22578	0.293705	3
72h_c1_881_1.5	CXCL8	16.754	72	OURT88/1	Virulent	1	0.558736	-0.83976	3
72h_c1_881_1.5	IL1RN	999	72	OURT88/1	Virulent	1	3.47385e-299	-991.46	5
72h_c1_881_1.5	ISG15	22.9085	72	OURT88/1	Virulent	1	0.0988417	-3.33874	6
72h_c1_881_1.5	MYD88	19.0707	72	OURT88/1	Virulent	1	0.349836	-1.51525	1
72h_c1_881_1.5	SIKE1	21.3107	72	OURT88/1	Virulent	1	0.719305	-0.475325	7
72h_c1_881_1.5	TLR4	20.2854	72	OURT88/1	Virulent	1	0.0887753	-3.4937	1
72h_c1_881_1.5	RAB1B	19.1783	72	OURT88/1	Virulent	1	0.772526	-0.372345	1
72h_c1_881_1.5	AXL	20.4429	72	OURT88/1	Virulent	1	0.600987	-0.734595	5
72h_c1_881_1.5	OAS1	19.8421	72	OURT88/1	Virulent	1	0.159493	-2.64844	5
72h_c1_881_1.5	TLR5	22.256	72	OURT88/1	Virulent	1	43.0911	5.42932
72h_c1_881_1.5	CCL20	999	72	OURT88/1	Virulent	1	9.65615e-298	-986.663	3
72h_c1_881_1.5	DDIT3	21.3478	72	OURT88/1	Virulent	1	0.267708	-1.90127	1
72h_c1_881_1.5	IFNG	20.1585	72	OURT88/1	Virulent	1	41.8598	5.38749
72h_c1_881_1.5	IL23	22.2765	72	OURT88/1	Virulent	1	4.05596	2.02004	2
72h_c1_881_1.5	KDM6B	26.5601	72	OURT88/1	Virulent	1	0.0163898	-5.93106	1
72h_c1_881_1.5	NFKB1	19.3047	72	OURT88/1	Virulent	1	0.168748	-2.56706	5
72h_c1_881_1.5	STAT2	21.1218	72	OURT88/1	Virulent	1	0.339413	-1.55889	5
72h_c1_881_1.5	TLR7	999	72	OURT88/1	Virulent	1	8.44328e-300	-993.501	7
72h_c1_881_1.5	SLA-DMB	19.5006	72	OURT88/1	Virulent	1	0.269139	-1.89358	1
72h_c1_881_1.5	ZBP1	20.6441	72	OURT88/1	Virulent	1	1.33267	0.414319	6
72h_c1_881_1.5	CXCL9	999	72	OURT88/1	Virulent	1	0.000931796	-10.0677
72h_c1_881_1.5	CGAS	999	72	OURT88/1	Virulent	1	1.5917e-299	-992.586	5
72h_c1_881_1.5	NFKBIE	22.581	72	OURT88/1	Virulent	1	0.1575	-2.66658	1
72h_c1_881_1.5	MAP3K7	23.0397	72	OURT88/1	Virulent	1	0.277563	-1.84911	1
72h_c1_881_1.5	IL27	999	72	OURT88/1	Virulent	1	1.20773e-298	-989.662	8
72h_c1_881_1.5	IFNGR1	19.1096	72	OURT88/1	Virulent	1	0.318844	-1.64908	1
72h_c1_881_1.5	EIF2AK2	19.2453	72	OURT88/1	Virulent	1	0.877025	-0.189311	6
72h_c1_881_1.5	CCL4	999	72	OURT88/1	Virulent	1	1.3922e-299	-992.779	3
72h_c1_881_1.5	SLA-DMA	19.1576	72	OURT88/1	Virulent	1	0.310475	-1.68745	1
72h_c1_881_1.5	CXCL10	999	72	OURT88/1	Virulent	1	6.71369e-299	-990.509	6
72h_c1_881_1.5	CD163	19.1541	72	OURT88/1	Virulent	1	0.0703353	-3.82961	1
72h_c1_881_1.5	PKR	18.6376	72	OURT88/1	Virulent	1	1.20885	0.27363
72h_c1_881_1.5	TNF	999	72	OURT88/1	Virulent	1	2.78713e-299	-991.778	6
72h_c1_881_1.5	TBK1	20.3198	72	OURT88/1	Virulent	1	0.424309	-1.23681	1
72h_c1_881_1.5	NFKBIZ	21.4405	72	OURT88/1	Virulent	1	0.105615	-3.24311	8
72h_c1_881_1.5	MAPK1	18.0028	72	OURT88/1	Virulent	1	0.894134	-0.161438	1
72h_c1_881_1.5	IL4R	20.8209	72	OURT88/1	Virulent	1	0.129683	-2.94694	1
72h_c1_881_1.5	IL10	999	72	OURT88/1	Virulent	1	5.02176e-200	-662.057
72h_c1_881_1.5	HSPA5	16.7964	72	OURT88/1	Virulent	1	0.891824	-0.165169	5
72h_c1_881_1.5	CD14	24.8823	72	OURT88/1	Virulent	1	0.0479454	-4.38246	1
72h_c1_881_1.5	PRKDC	21.8953	72	OURT88/1	Virulent	1	10.0871	3.33444	4
72h_c1_881_1.5	B2M	13.8642	72	OURT88/1	Virulent	1	0.390132	-1.35797	3
72h_c1_881_1.5	TIMD4	999	72	OURT88/1	Virulent	1	0.000931796	-10.0677
72h_c1_881_1.5	IFI16	26.536	72	OURT88/1	Virulent	1	0.121729	-3.03826	8
72h_c1_881_1.5	TNFAIP3	19.4444	72	OURT88/1	Virulent	1	0.330454	-1.59748	5
72h_c1_881_1.5	TGFB1	16.9833	72	OURT88/1	Virulent	1	0.74338	-0.427828	1
72h_c1_881_1.5	PBD-2	999	72	OURT88/1	Virulent	1	0.000931796	-10.0677
72h_c1_881_1.5	MAVS	21.8578	72	OURT88/1	Virulent	1	0.828117	-0.272093	1
72h_c1_881_1.5	IL7	999	72	OURT88/1	Virulent	1	4.06863e-299	-991.232	7
72h_c1_881_1.5	IL16	21.5039	72	OURT88/1	Virulent	1	0.388851	-1.36271	7
72h_c1_881_1.5	IFNB1	20.2951	72	OURT88/1	Virulent	1	138.828	7.11715	6
72h_c1_881_1.5	CD4	21.9409	72	OURT88/1	Virulent	1	2.39777e+99	330.133
72h_c1_881_1.5	TLR9	20.7647	72	OURT88/1	Virulent	1	7.37999e+99	331.755
72h_c1_881_1.5	GAPDH	13.9603	72	OURT88/1	Virulent	1	0.889017	-0.169716
72h_c1_881_1.5	NLRP3	22.8399	72	OURT88/1	Virulent	1	10.8553	3.44033	2
72h_c1_881_1.5	SLFN11	20.0549	72	OURT88/1	Virulent	1	3.70979	1.89134	6
72h_c1_881_1.5	TNFS10	21.4589	72	OURT88/1	Virulent	1	2.27977	1.18889	6
72h_c1_881_1.5	TGFBR1	20.8062	72	OURT88/1	Virulent	1	0.172924	-2.53179	1
72h_c1_881_1.5	RIGI	23.2441	72	OURT88/1	Virulent	1	0.0756599	-3.72433	6
72h_c1_881_1.5	MCU	19.5724	72	OURT88/1	Virulent	1	10.8042	3.43352	4
72h_c1_881_1.5	IRAK1	20.8615	72	OURT88/1	Virulent	1	0.749404	-0.416185	1
72h_c1_881_1.5	IL18	21.9364	72	OURT88/1	Virulent	1	0.207466	-2.26905	7
72h_c1_881_1.5	IFIT1	999	72	OURT88/1	Virulent	1	1.7314e-299	-992.465	6
72h_c1_881_1.5	CSF2	21.1991	72	OURT88/1	Virulent	1	3.75434	1.90856	2
72h_c1_881_1.5	SOD2	17.7919	72	OURT88/1	Virulent	1	0.103113	-3.2777	1
72h_c1_881_1.5	RPL19	14.797	72	OURT88/1	Virulent	1	1.15423	0.206935
72h_c1_881_1.5	SNX32	20.3827	72	OURT88/1	Virulent	1	1.86332e+99	329.769
72h_c1_881_1.5	RXFAP	22.1165	72	OURT88/1	Virulent	1	1.24659	0.317988	1
72h_c1_881_1.5	UNC93B1	19.6884	72	OURT88/1	Virulent	1	0.248997	-2.0058	6
72h_c1_881_1.5	TGIF2	999	72	OURT88/1	Virulent	1	7.05611e-299	-990.438	8
24h_c1_NI	C3	11.1623	24	Non infected	Non infected	1	1.71395	0.777327	1
24h_c1_NI	CSF3	21.1898	24	Non infected	Non infected	1	1.04239	0.0598984	2
24h_c1_NI	IL1A	14.6848	24	Non infected	Non infected	1	0.709037	-0.496068	3
24h_c1_NI	IRAK4	15.4228	24	Non infected	Non infected	1	1.03734	0.0528875	1
24h_c1_NI	IFNA1	22.2095	24	Non infected	Non infected	1	1.27714	0.352921	4
24h_c1_NI	SAMHD1	15.9824	24	Non infected	Non infected	1	1.64596	0.71893	5
24h_c1_NI	TIMP1	17.8643	24	Non infected	Non infected	1	1.05133	0.0722205	2
24h_c1_NI	RSAD2	19.1318	24	Non infected	Non infected	1	0.631125	-0.664003	6
24h_c1_NI	CIITA	16.1804	24	Non infected	Non infected	1	1.20161	0.264971	1
24h_c1_NI	STING	18.548	24	Non infected	Non infected	1	1.00364	0.00524246	7
24h_c1_NI	HSP70.2	21.8326	24	Non infected	Non infected	1	4.04604	2.01651	6
24h_c1_NI	CASP3	16.3774	24	Non infected	Non infected	1	0.709056	-0.496029	1
24h_c1_NI	CXCL2	12.1376	24	Non infected	Non infected	1	0.859499	-0.218433	3
24h_c1_NI	IFNAR1	15.2389	24	Non infected	Non infected	1	1.01689	0.0241625	1
24h_c1_NI	IL1B	16.3079	24	Non infected	Non infected	1	0.684046	-0.547835	2
24h_c1_NI	IRF3	16.3788	24	Non infected	Non infected	1	1.00207	0.00297789	1
24h_c1_NI	MX1	17.9959	24	Non infected	Non infected	1	0.59194	-0.756478	6
24h_c1_NI	SCNN1B	999	24	Non infected	Non infected	1	1.66156e-199	-660.331
24h_c1_NI	TLR3	18.4938	24	Non infected	Non infected	1	0.546618	-0.871396	8
24h_c1_NI	VNN2	15.128	24	Non infected	Non infected	1	3.86377	1.95001	7
24h_c1_NI	SIGLEC1	14.2574	24	Non infected	Non infected	1	1.34769	0.43049	1
24h_c1_NI	BANF1	13.9952	24	Non infected	Non infected	1	0.752851	-0.409563	1
24h_c1_NI	SOCS3	23.9514	24	Non infected	Non infected	1	8.46624e+195	650.858
24h_c1_NI	CCL2	17.5246	24	Non infected	Non infected	1	0.552	-0.85726	3
24h_c1_NI	CXCL8	12.5727	24	Non infected	Non infected	1	0.894229	-0.161284	3
24h_c1_NI	IL1RN	18.7408	24	Non infected	Non infected	1	0.798367	-0.324875	5
24h_c1_NI	ISG15	18.9116	24	Non infected	Non infected	1	0.139206	-2.8447	6
24h_c1_NI	MYD88	13.4134	24	Non infected	Non infected	1	1.55759	0.639315	1
24h_c1_NI	SIKE1	17.0556	24	Non infected	Non infected	1	1.21166	0.276987	7
24h_c1_NI	TLR4	13.517	24	Non infected	Non infected	1	0.853765	-0.228089	1
24h_c1_NI	RAB1B	15.0391	24	Non infected	Non infected	1	1.20082	0.26402	1
24h_c1_NI	AXL	15.9008	24	Non infected	Non infected	1	1.23523	0.304776	5
24h_c1_NI	OAS1	13.9637	24	Non infected	Non infected	1	0.827697	-0.272825	5
24h_c1_NI	TLR5	24.4152	24	Non infected	Non infected	1	0.851065	-0.232659
24h_c1_NI	CCL20	999	24	Non infected	Non infected	1	9.65615e-298	-986.663	3
24h_c1_NI	DDIT3	17.1165	24	Non infected	Non infected	1	0.44359	-1.1727	1
24h_c1_NI	IFNG	23.7268	24	Non infected	Non infected	1	0.311309	-1.68358
24h_c1_NI	IL23	22.2162	24	Non infected	Non infected	1	0.373098	-1.42237	2
24h_c1_NI	KDM6B	16.8269	24	Non infected	Non infected	1	1.23054	0.299286	1
24h_c1_NI	NFKB1	12.8777	24	Non infected	Non infected	1	1.28092	0.357179	5
24h_c1_NI	STAT2	16.058	24	Non infected	Non infected	1	1.00145	0.00208632	5
24h_c1_NI	TLR7	15.697	24	Non infected	Non infected	1	1.60022	0.678267	7
24h_c1_NI	SLA-DMB	14.6868	24	Non infected	Non infected	1	0.667767	-0.582582	1
24h_c1_NI	ZBP1	17.0433	24	Non infected	Non infected	1	1.4264	0.512378	6
24h_c1_NI	CXCL9	999	24	Non infected	Non infected	1	0.000931796	-10.0677
24h_c1_NI	CGAS	17.5505	24	Non infected	Non infected	1	0.834761	-0.260565	5
24h_c1_NI	NFKBIE	15.5656	24	Non infected	Non infected	1	1.79763	0.846097	1
24h_c1_NI	MAP3K7	17.8201	24	Non infected	Non infected	1	0.912353	-0.132336	1
24h_c1_NI	IL27	20.1831	24	Non infected	Non infected	1	1.02138	0.030516	8
24h_c1_NI	IFNGR1	14.0805	24	Non infected	Non infected	1	0.918421	-0.122773	1
24h_c1_NI	EIF2AK2	15.0167	24	Non infected	Non infected	1	1.45046	0.536511	6
24h_c1_NI	CCL4	16.8444	24	Non infected	Non infected	1	1.19118	0.25239	3
24h_c1_NI	SLA-DMA	14.5849	24	Non infected	Non infected	1	0.651773	-0.617558	1
24h_c1_NI	CXCL10	19.0592	24	Non infected	Non infected	1	1.23738	0.307293	6
24h_c1_NI	CD163	11.6039	24	Non infected	Non infected	1	1.16298	0.217826	1
24h_c1_NI	PKR	15.3597	24	Non infected	Non infected	1	1.03441	0.048815
24h_c1_NI	TNF	17.4424	24	Non infected	Non infected	1	1.57543	0.655743	6
24h_c1_NI	TBK1	15.8101	24	Non infected	Non infected	1	0.852718	-0.22986	1
24h_c1_NI	NFKBIZ	14.9022	24	Non infected	Non infected	1	0.865986	-0.207584	8
24h_c1_NI	MAPK1	14.3193	24	Non infected	Non infected	1	1.01345	0.0192739	1
24h_c1_NI	IL4R	14.349	24	Non infected	Non infected	1	1.0155	0.0221932	1
24h_c1_NI	IL10	19.4262	24	Non infected	Non infected	1	7.1766e+98	328.392
24h_c1_NI	HSPA5	12.6606	24	Non infected	Non infected	1	1.38309	0.467898	5
24h_c1_NI	CD14	15.7969	24	Non infected	Non infected	1	2.29751	1.20007	1
24h_c1_NI	PRKDC	22.2707	24	Non infected	Non infected	1	0.686009	-0.5437	4
24h_c1_NI	B2M	9.98232	24	Non infected	Non infected	1	0.507389	-0.978835	3
24h_c1_NI	TIMD4	999	24	Non infected	Non infected	1	0.000931796	-10.0677
24h_c1_NI	IFI16	999	24	Non infected	Non infected	1	1.03787e-298	-989.881	8
24h_c1_NI	TNFAIP3	13.5575	24	Non infected	Non infected	1	1.72512	0.786693	5
24h_c1_NI	TGFB1	12.2627	24	Non infected	Non infected	1	1.72903	0.789964	1
24h_c1_NI	PBD-2	999	24	Non infected	Non infected	1	0.000931796	-10.0677
24h_c1_NI	MAVS	18.0326	24	Non infected	Non infected	1	1.03544	0.0502507	1
24h_c1_NI	IL7	18.8728	24	Non infected	Non infected	1	0.853313	-0.228854	7
24h_c1_NI	IL16	16.2771	24	Non infected	Non infected	1	1.28462	0.361341	7
24h_c1_NI	IFNB1	24.0325	24	Non infected	Non infected	1	0.918289	-0.122979	6
24h_c1_NI	CD4	29.6579	24	Non infected	Non infected	1	1.00536e+96	318.913
24h_c1_NI	TLR9	23.6149	24	Non infected	Non infected	1	9.02893e+97	325.402
24h_c1_NI	GAPDH	9.96736	24	Non infected	Non infected	1	1.24871	0.320443
24h_c1_NI	NLRP3	24.579	24	Non infected	Non infected	1	0.286861	-1.80158	2
24h_c1_NI	SLFN11	17.128	24	Non infected	Non infected	1	2.48869	1.31538	6
24h_c1_NI	TNFS10	17.6094	24	Non infected	Non infected	1	2.89903	1.53557	6
24h_c1_NI	TGFBR1	14.6437	24	Non infected	Non infected	1	1.09273	0.127938	1
24h_c1_NI	RIGI	16.1426	24	Non infected	Non infected	1	0.916633	-0.125584	6
24h_c1_NI	MCU	18.6306	24	Non infected	Non infected	1	1.83088	0.872539	4
24h_c1_NI	IRAK1	16.6296	24	Non infected	Non infected	1	1.24222	0.312919	1
24h_c1_NI	IL18	15.4488	24	Non infected	Non infected	1	1.64232	0.715731	7
24h_c1_NI	IFIT1	20.231	24	Non infected	Non infected	1	0.141638	-2.81972	6
24h_c1_NI	CSF2	19.4881	24	Non infected	Non infected	1	1.08431	0.116777	2
24h_c1_NI	SOD2	10.6581	24	Non infected	Non infected	1	1.27749	0.353309	1
24h_c1_NI	RPL19	11.7844	24	Non infected	Non infected	1	0.821752	-0.283225
24h_c1_NI	SNX32	21.9571	24	Non infected	Non infected	1	5.51955e+97	324.692
24h_c1_NI	RXFAP	18.5433	24	Non infected	Non infected	1	1.30892	0.388377	1
24h_c1_NI	UNC93B1	14.1841	24	Non infected	Non infected	1	0.997052	-0.004259	6
24h_c1_NI	TGIF2	18.2622	24	Non infected	Non infected	1	2.25952	1.17602	8
8h_c2_NHP_0.5	C3	11.3316	8	NH/P68	Attenuated	2	0.819389	-0.287379	1
8h_c2_NHP_0.5	CSF3	20.2648	8	NH/P68	Attenuated	2	1.06399	0.0894794	2
8h_c2_NHP_0.5	IL1A	14.7604	8	NH/P68	Attenuated	2	0.361734	-1.467	3
8h_c2_NHP_0.5	IRAK4	14.6131	8	NH/P68	Attenuated	2	0.977544	-0.0327672	1
8h_c2_NHP_0.5	IFNA1	20.9455	8	NH/P68	Attenuated	2	1.64893	0.72153	4
8h_c2_NHP_0.5	SAMHD1	17.0899	8	NH/P68	Attenuated	2	0.410685	-1.2839	5
8h_c2_NHP_0.5	TIMP1	17.1288	8	NH/P68	Attenuated	2	0.941117	-0.0875542	2
8h_c2_NHP_0.5	RSAD2	15.0932	8	NH/P68	Attenuated	2	5.57589	2.4792	6
8h_c2_NHP_0.5	CIITA	16.1182	8	NH/P68	Attenuated	2	0.674447	-0.568222	1
8h_c2_NHP_0.5	STING	17.5066	8	NH/P68	Attenuated	2	1.11057	0.151294	7
8h_c2_NHP_0.5	HSP70.2	21.9508	8	NH/P68	Attenuated	2	2.00412	1.00297	6
8h_c2_NHP_0.5	CASP3	15.0175	8	NH/P68	Attenuated	2	0.978405	-0.0314967	1
8h_c2_NHP_0.5	CXCL2	12.1808	8	NH/P68	Attenuated	2	0.448438	-1.15702	3
8h_c2_NHP_0.5	IFNAR1	14.7953	8	NH/P68	Attenuated	2	0.743519	-0.427558	1
8h_c2_NHP_0.5	IL1B	17.6612	8	NH/P68	Attenuated	2	0.143937	-2.79649	2
8h_c2_NHP_0.5	IRF3	15.3982	8	NH/P68	Attenuated	2	1.06306	0.0882248	1
8h_c2_NHP_0.5	MX1	15.4802	8	NH/P68	Attenuated	2	1.81991	0.863865	6
8h_c2_NHP_0.5	SCNN1B	999	8	NH/P68	Attenuated	2	1.66156e-199	-660.331
8h_c2_NHP_0.5	TLR3	16.639	8	NH/P68	Attenuated	2	1.06291	0.0880172	8
8h_c2_NHP_0.5	VNN2	17.0759	8	NH/P68	Attenuated	2	0.538409	-0.893227	7
8h_c2_NHP_0.5	SIGLEC1	13.5078	8	NH/P68	Attenuated	2	1.21825	0.284807	1
8h_c2_NHP_0.5	BANF1	12.4468	8	NH/P68	Attenuated	2	1.18378	0.243401	1
8h_c2_NHP_0.5	SOCS3	23.7481	8	NH/P68	Attenuated	2	5.24016e+195	650.166
8h_c2_NHP_0.5	CCL2	15.6095	8	NH/P68	Attenuated	2	1.11928	0.16257	3
8h_c2_NHP_0.5	CXCL8	11.7441	8	NH/P68	Attenuated	2	0.853806	-0.22802	3
8h_c2_NHP_0.5	IL1RN	18.3062	8	NH/P68	Attenuated	2	0.580117	-0.785584	5
8h_c2_NHP_0.5	ISG15	14.0703	8	NH/P68	Attenuated	2	2.14541	1.10126	6
8h_c2_NHP_0.5	MYD88	13.2702	8	NH/P68	Attenuated	2	0.924734	-0.11289	1
8h_c2_NHP_0.5	SIKE1	16.1538	8	NH/P68	Attenuated	2	1.21705	0.283388	7
8h_c2_NHP_0.5	TLR4	12.7465	8	NH/P68	Attenuated	2	0.783028	-0.352865	1
8h_c2_NHP_0.5	RAB1B	14.4757	8	NH/P68	Attenuated	2	0.954022	-0.0679048	1
8h_c2_NHP_0.5	AXL	16.1717	8	NH/P68	Attenuated	2	0.55039	-0.861475	5
8h_c2_NHP_0.5	OAS1	13.2433	8	NH/P68	Attenuated	2	0.733172	-0.447777	5
8h_c2_NHP_0.5	TLR5	21.4027	8	NH/P68	Attenuated	2	3.69224	1.8845
8h_c2_NHP_0.5	CCL20	999	8	NH/P68	Attenuated	2	9.65615e-298	-986.663	3
8h_c2_NHP_0.5	DDIT3	14.4433	8	NH/P68	Attenuated	2	1.52108	0.605096	1
8h_c2_NHP_0.5	IFNG	20.4619	8	NH/P68	Attenuated	2	1.60873	0.685918
8h_c2_NHP_0.5	IL23	20.8743	8	NH/P68	Attenuated	2	0.508448	-0.975829	2
8h_c2_NHP_0.5	KDM6B	16.5085	8	NH/P68	Attenuated	2	0.824948	-0.277624	1
8h_c2_NHP_0.5	NFKB1	12.6307	8	NH/P68	Attenuated	2	0.817193	-0.291251	5
8h_c2_NHP_0.5	STAT2	15.3497	8	NH/P68	Attenuated	2	0.879691	-0.184932	5
8h_c2_NHP_0.5	TLR7	16.097	8	NH/P68	Attenuated	2	0.652002	-0.617052	7
8h_c2_NHP_0.5	SLA-DMB	13.3289	8	NH/P68	Attenuated	2	0.920186	-0.120002	1
8h_c2_NHP_0.5	ZBP1	15.6195	8	NH/P68	Attenuated	2	2.05731	1.04076	6
8h_c2_NHP_0.5	CXCL9	999	8	NH/P68	Attenuated	2	0.000931796	-10.0677
8h_c2_NHP_0.5	CGAS	16.9136	8	NH/P68	Attenuated	2	0.697871	-0.518968	5
8h_c2_NHP_0.5	NFKBIE	15.5464	8	NH/P68	Attenuated	2	0.97938	-0.0300591	1
8h_c2_NHP_0.5	MAP3K7	16.4911	8	NH/P68	Attenuated	2	1.23227	0.301315	1
8h_c2_NHP_0.5	IL27	19.8149	8	NH/P68	Attenuated	2	0.708754	-0.496644	8
8h_c2_NHP_0.5	IFNGR1	13.1239	8	NH/P68	Attenuated	2	0.95825	-0.0615266	1
8h_c2_NHP_0.5	EIF2AK2	13.731	8	NH/P68	Attenuated	2	1.9011	0.926836	6
8h_c2_NHP_0.5	CCL4	15.7234	8	NH/P68	Attenuated	2	1.39286	0.478049	3
8h_c2_NHP_0.5	SLA-DMA	13.5498	8	NH/P68	Attenuated	2	0.718081	-0.477781	1
8h_c2_NHP_0.5	CXCL10	17.2148	8	NH/P68	Attenuated	2	2.38897	1.25639	6
8h_c2_NHP_0.5	CD163	11.3803	8	NH/P68	Attenuated	2	0.730057	-0.453918	1
8h_c2_NHP_0.5	PKR	13.9145	8	NH/P68	Attenuated	2	1.5143	0.598655
8h_c2_NHP_0.5	TNF	16.7048	8	NH/P68	Attenuated	2	1.41229	0.498039	6
8h_c2_NHP_0.5	TBK1	15.0142	8	NH/P68	Attenuated	2	0.795861	-0.329411	1
8h_c2_NHP_0.5	NFKBIZ	15.4804	8	NH/P68	Attenuated	2	0.311832	-1.68116	8
8h_c2_NHP_0.5	MAPK1	12.8468	8	NH/P68	Attenuated	2	1.51197	0.59643	1
8h_c2_NHP_0.5	IL4R	14.5977	8	NH/P68	Attenuated	2	0.459489	-1.1219	1
8h_c2_NHP_0.5	IL10	999	8	NH/P68	Attenuated	2	5.02176e-200	-662.057
8h_c2_NHP_0.5	HSPA5	12.3022	8	NH/P68	Attenuated	2	0.953224	-0.0691135	5
8h_c2_NHP_0.5	CD14	16.2491	8	NH/P68	Attenuated	2	0.902838	-0.147462	1
8h_c2_NHP_0.5	PRKDC	19.7836	8	NH/P68	Attenuated	2	2.06772	1.04804	4
8h_c2_NHP_0.5	B2M	7.44036	8	NH/P68	Attenuated	2	1.58861	0.667766	3
8h_c2_NHP_0.5	TIMD4	999	8	NH/P68	Attenuated	2	0.000931796	-10.0677
8h_c2_NHP_0.5	IFI16	18.6315	8	NH/P68	Attenuated	2	1.3833	0.468116	8
8h_c2_NHP_0.5	TNFAIP3	13.5101	8	NH/P68	Attenuated	2	0.958414	-0.0612796	5
8h_c2_NHP_0.5	TGFB1	12.0205	8	NH/P68	Attenuated	2	1.09949	0.136838	1
8h_c2_NHP_0.5	PBD-2	999	8	NH/P68	Attenuated	2	0.000931796	-10.0677
8h_c2_NHP_0.5	MAVS	17.0335	8	NH/P68	Attenuated	2	1.11265	0.153994	1
8h_c2_NHP_0.5	IL7	17.2288	8	NH/P68	Attenuated	2	1.43373	0.519769	7
8h_c2_NHP_0.5	IL16	15.284	8	NH/P68	Attenuated	2	1.37463	0.459042	7
8h_c2_NHP_0.5	IFNB1	21.3305	8	NH/P68	Attenuated	2	3.21245	1.68367	6
8h_c2_NHP_0.5	CD4	22.0222	8	NH/P68	Attenuated	2	1.0749e+98	325.653
8h_c2_NHP_0.5	TLR9	21.3485	8	NH/P68	Attenuated	2	2.33533e+98	326.773
8h_c2_NHP_0.5	GAPDH	9.47315	8	NH/P68	Attenuated	2	0.945595	-0.0807052
8h_c2_NHP_0.5	NLRP3	23.0099	8	NH/P68	Attenuated	2	0.457601	-1.12784	2
8h_c2_NHP_0.5	SLFN11	16.8891	8	NH/P68	Attenuated	2	1.57896	0.658976	6
8h_c2_NHP_0.5	TNFS10	17.0855	8	NH/P68	Attenuated	2	2.24087	1.16406	6
8h_c2_NHP_0.5	TGFBR1	13.7615	8	NH/P68	Attenuated	2	1.0828	0.114766	1
8h_c2_NHP_0.5	RIGI	14.558	8	NH/P68	Attenuated	2	1.47803	0.563674	6
8h_c2_NHP_0.5	MCU	17.7233	8	NH/P68	Attenuated	2	1.84609	0.88447	4
8h_c2_NHP_0.5	IRAK1	15.7094	8	NH/P68	Attenuated	2	1.26379	0.337762	1
8h_c2_NHP_0.5	IL18	16.389	8	NH/P68	Attenuated	2	0.460166	-1.11977	7
8h_c2_NHP_0.5	IFIT1	15.3847	8	NH/P68	Attenuated	2	2.19058	1.13131	6
8h_c2_NHP_0.5	CSF2	18.8032	8	NH/P68	Attenuated	2	0.937105	-0.0937179	2
8h_c2_NHP_0.5	SOD2	10.3238	8	NH/P68	Attenuated	2	0.86591	-0.20771	1
8h_c2_NHP_0.5	RPL19	10.4879	8	NH/P68	Attenuated	2	1.08517	0.117924
8h_c2_NHP_0.5	SNX32	19.532	8	NH/P68	Attenuated	2	1.59377e+98	326.221
8h_c2_NHP_0.5	RXFAP	18.3997	8	NH/P68	Attenuated	2	0.777357	-0.36335	1
8h_c2_NHP_0.5	UNC93B1	13.2961	8	NH/P68	Attenuated	2	0.991977	-0.011622	6
8h_c2_NHP_0.5	TGIF2	19.7888	8	NH/P68	Attenuated	2	0.421651	-1.24588	8
48h_c1_883_0.5	C3	14.2994	48	OURT88/3	Attenuated	1	0.673077	-0.571156	1
48h_c1_883_0.5	CSF3	21.7612	48	OURT88/3	Attenuated	1	2.42358	1.27714	2
48h_c1_883_0.5	IL1A	16.8043	48	OURT88/3	Attenuated	1	0.563758	-0.826853	3
48h_c1_883_0.5	IRAK4	19.0625	48	OURT88/3	Attenuated	1	0.287527	-1.79823	1
48h_c1_883_0.5	IFNA1	23.7795	48	OURT88/3	Attenuated	1	1.48606	0.571489	4
48h_c1_883_0.5	SAMHD1	17.9412	48	OURT88/3	Attenuated	1	1.46278	0.54871	5
48h_c1_883_0.5	TIMP1	19.3901	48	OURT88/3	Attenuated	1	1.26143	0.335061	2
48h_c1_883_0.5	RSAD2	14.5049	48	OURT88/3	Attenuated	1	53.8738	5.75151	6
48h_c1_883_0.5	CIITA	19.4245	48	OURT88/3	Attenuated	1	0.438145	-1.19052	1
48h_c1_883_0.5	STING	23.101	48	OURT88/3	Attenuated	1	0.147722	-2.75904	7
48h_c1_883_0.5	HSP70.2	18.0754	48	OURT88/3	Attenuated	1	189.016	7.56237	6
48h_c1_883_0.5	CASP3	19.6651	48	OURT88/3	Attenuated	1	0.250863	-1.99503	1
48h_c1_883_0.5	CXCL2	14.4392	48	OURT88/3	Attenuated	1	0.602288	-0.731474	3
48h_c1_883_0.5	IFNAR1	19.6956	48	OURT88/3	Attenuated	1	0.16	-2.64386	1
48h_c1_883_0.5	IL1B	18.8358	48	OURT88/3	Attenuated	1	0.409776	-1.28709	2
48h_c1_883_0.5	IRF3	19.8055	48	OURT88/3	Attenuated	1	0.32197	-1.635	1
48h_c1_883_0.5	MX1	15.3892	48	OURT88/3	Attenuated	1	12.4561	3.63878	6
48h_c1_883_0.5	SCNN1B	999	48	OURT88/3	Attenuated	1	1.66156e-199	-660.331
48h_c1_883_0.5	TLR3	19.3387	48	OURT88/3	Attenuated	1	1.0514	0.072306	8
48h_c1_883_0.5	VNN2	20.9534	48	OURT88/3	Attenuated	1	0.23541	-2.08675	7
48h_c1_883_0.5	SIGLEC1	16.3102	48	OURT88/3	Attenuated	1	1.12219	0.166311	1
48h_c1_883_0.5	BANF1	16.0416	48	OURT88/3	Attenuated	1	0.629637	-0.667407	1
48h_c1_883_0.5	SOCS3	999	48	OURT88/3	Attenuated	1	1.36408e-101	-335.067
48h_c1_883_0.5	CCL2	18.5274	48	OURT88/3	Attenuated	1	0.951747	-0.0713502	3
48h_c1_883_0.5	CXCL8	14.1406	48	OURT88/3	Attenuated	1	1.04209	0.0594853	3
48h_c1_883_0.5	IL1RN	18.7164	48	OURT88/3	Attenuated	1	2.80525	1.48813	5
48h_c1_883_0.5	ISG15	13.4501	48	OURT88/3	Attenuated	1	21.1922	4.40546	6
48h_c1_883_0.5	MYD88	17.5173	48	OURT88/3	Attenuated	1	0.312955	-1.67597	1
48h_c1_883_0.5	SIKE1	22.5928	48	OURT88/3	Attenuated	1	0.0901435	-3.47163	7
48h_c1_883_0.5	TLR4	18.8352	48	OURT88/3	Attenuated	1	0.0739348	-3.7576	1
48h_c1_883_0.5	RAB1B	18.8054	48	OURT88/3	Attenuated	1	0.3049	-1.71359	1
48h_c1_883_0.5	AXL	18.9351	48	OURT88/3	Attenuated	1	0.520909	-0.940897	5
48h_c1_883_0.5	OAS1	14.5747	48	OURT88/3	Attenuated	1	1.87226	0.904778	5
48h_c1_883_0.5	TLR5	999	48	OURT88/3	Attenuated	1	1.89124e-297	-985.693
48h_c1_883_0.5	CCL20	22.464	48	OURT88/3	Attenuated	1	5.8056	2.53744	3
48h_c1_883_0.5	DDIT3	19.0058	48	OURT88/3	Attenuated	1	0.413695	-1.27336	1
48h_c1_883_0.5	IFNG	23.4034	48	OURT88/3	Attenuated	1	1.34578	0.428442
48h_c1_883_0.5	IL23	26.9248	48	OURT88/3	Attenuated	1	0.0492978	-4.34233	2
48h_c1_883_0.5	KDM6B	21.2886	48	OURT88/3	Attenuated	1	0.192941	-2.37377	1
48h_c1_883_0.5	NFKB1	15.7933	48	OURT88/3	Attenuated	1	0.586477	-0.769854	5
48h_c1_883_0.5	STAT2	17.8047	48	OURT88/3	Attenuated	1	1.03098	0.0440212	5
48h_c1_883_0.5	TLR7	19.8085	48	OURT88/3	Attenuated	1	0.319824	-1.64465	7
48h_c1_883_0.5	SLA-DMB	17.03	48	OURT88/3	Attenuated	1	0.454669	-1.13711	1
48h_c1_883_0.5	ZBP1	16.782	48	OURT88/3	Attenuated	1	5.90627	2.56225	6
48h_c1_883_0.5	CXCL9	999	48	OURT88/3	Attenuated	1	0.000931796	-10.0677
48h_c1_883_0.5	CGAS	20.6639	48	OURT88/3	Attenuated	1	0.333245	-1.58535	5
48h_c1_883_0.5	NFKBIE	18.8724	48	OURT88/3	Attenuated	1	0.627594	-0.672096	1
48h_c1_883_0.5	MAP3K7	19.3061	48	OURT88/3	Attenuated	1	1.1253	0.170308	1
48h_c1_883_0.5	IL27	22.384	48	OURT88/3	Attenuated	1	0.767495	-0.381771	8
48h_c1_883_0.5	IFNGR1	18.0372	48	OURT88/3	Attenuated	1	0.204351	-2.29088	1
48h_c1_883_0.5	EIF2AK2	15.6121	48	OURT88/3	Attenuated	1	3.31678	1.72978	6
48h_c1_883_0.5	CCL4	15.3956	48	OURT88/3	Attenuated	1	11.2338	3.48978	3
48h_c1_883_0.5	SLA-DMA	17.7755	48	OURT88/3	Attenuated	1	0.246631	-2.01957	1
48h_c1_883_0.5	CXCL10	16.9817	48	OURT88/3	Attenuated	1	18.044	4.17344	6
48h_c1_883_0.5	CD163	17.4049	48	OURT88/3	Attenuated	1	0.0720689	-3.79448	1
48h_c1_883_0.5	PKR	15.1783	48	OURT88/3	Attenuated	1	4.05244	2.01879
48h_c1_883_0.5	TNF	17.9395	48	OURT88/3	Attenuated	1	3.85657	1.94732	6
48h_c1_883_0.5	TBK1	18.9415	48	OURT88/3	Attenuated	1	0.336175	-1.57272	1
48h_c1_883_0.5	NFKBIZ	17.5946	48	OURT88/3	Attenuated	1	0.462859	-1.11136	8
48h_c1_883_0.5	MAPK1	16.8477	48	OURT88/3	Attenuated	1	0.6069	-0.720469	1
48h_c1_883_0.5	IL4R	19.3016	48	OURT88/3	Attenuated	1	0.113303	-3.14174	1
48h_c1_883_0.5	IL10	999	48	OURT88/3	Attenuated	1	5.02176e-200	-662.057
48h_c1_883_0.5	HSPA5	15.2596	48	OURT88/3	Attenuated	1	0.788687	-0.342475	5
48h_c1_883_0.5	CD14	21.4861	48	OURT88/3	Attenuated	1	0.153849	-2.70041	1
48h_c1_883_0.5	PRKDC	23.5706	48	OURT88/3	Attenuated	1	0.962588	-0.0550098	4
48h_c1_883_0.5	B2M	10.3749	48	OURT88/3	Attenuated	1	1.33539	0.417256	3
48h_c1_883_0.5	TIMD4	999	48	OURT88/3	Attenuated	1	0.000931796	-10.0677
48h_c1_883_0.5	IFI16	20.4765	48	OURT88/3	Attenuated	1	2.47439	1.30707	8
48h_c1_883_0.5	TNFAIP3	15.8567	48	OURT88/3	Attenuated	1	1.21096	0.276146	5
48h_c1_883_0.5	TGFB1	15.0975	48	OURT88/3	Attenuated	1	0.837302	-0.256179	1
48h_c1_883_0.5	PBD-2	999	48	OURT88/3	Attenuated	1	0.000931796	-10.0677
48h_c1_883_0.5	MAVS	20.8106	48	OURT88/3	Attenuated	1	0.521555	-0.93911	1
48h_c1_883_0.5	IL7	23.2497	48	OURT88/3	Attenuated	1	0.141895	-2.8171	7
48h_c1_883_0.5	IL16	22.0588	48	OURT88/3	Attenuated	1	0.080674	-3.63175	7
48h_c1_883_0.5	IFNB1	15.2623	48	OURT88/3	Attenuated	1	1385.15	10.4358	6
48h_c1_883_0.5	CD4	22.8384	48	OURT88/3	Attenuated	1	3.92293e+98	327.521
48h_c1_883_0.5	TLR9	999	48	OURT88/3	Attenuated	1	1.15207e-199	-660.859
48h_c1_883_0.5	GAPDH	11.9491	48	OURT88/3	Attenuated	1	1.09229	0.127361
48h_c1_883_0.5	NLRP3	999	48	OURT88/3	Attenuated	1	7.1408e-298	-987.098	2
48h_c1_883_0.5	SLFN11	18.0351	48	OURT88/3	Attenuated	1	4.5851	2.19695	6
48h_c1_883_0.5	TNFS10	19.2068	48	OURT88/3	Attenuated	1	3.30991	1.72679	6
48h_c1_883_0.5	TGFBR1	18.6224	48	OURT88/3	Attenuated	1	0.239463	-2.06212	1
48h_c1_883_0.5	RIGI	15.8861	48	OURT88/3	Attenuated	1	3.78293	1.9195	6
48h_c1_883_0.5	MCU	20.4431	48	OURT88/3	Attenuated	1	1.80088	0.848706	4
48h_c1_883_0.5	IRAK1	19.1637	48	OURT88/3	Attenuated	1	0.740958	-0.432536	1
48h_c1_883_0.5	IL18	21.6272	48	OURT88/3	Attenuated	1	0.0783475	-3.67397	7
48h_c1_883_0.5	IFIT1	14.7866	48	OURT88/3	Attenuated	1	21.3081	4.41333	6
48h_c1_883_0.5	CSF2	999	48	OURT88/3	Attenuated	1	7.9198e-299	-990.271	2
48h_c1_883_0.5	SOD2	14.6875	48	OURT88/3	Attenuated	1	0.270276	-1.88749	1
48h_c1_883_0.5	RPL19	13.38	48	OURT88/3	Attenuated	1	0.93943	-0.0901427
48h_c1_883_0.5	SNX32	23.2021	48	OURT88/3	Attenuated	1	8.04538e+97	325.235
48h_c1_883_0.5	RXFAP	23.3675	48	OURT88/3	Attenuated	1	0.159628	-2.64721	1
48h_c1_883_0.5	UNC93B1	14.9025	48	OURT88/3	Attenuated	1	2.09358	1.06597	6
48h_c1_883_0.5	TGIF2	22.2505	48	OURT88/3	Attenuated	1	0.491882	-1.02361	8
8h_c3_NI	C3	11.0421	8	Non infected	Non infected	3	1.38521	0.470104	1
8h_c3_NI	CSF3	21.222	8	Non infected	Non infected	3	0.758005	-0.399722	2
8h_c3_NI	IL1A	14.8459	8	Non infected	Non infected	3	0.471535	-1.08456	3
8h_c3_NI	IRAK4	14.4949	8	Non infected	Non infected	3	1.46748	0.553344	1
8h_c3_NI	IFNA1	21.6755	8	Non infected	Non infected	3	1.37505	0.459484	4
8h_c3_NI	SAMHD1	17.0664	8	Non infected	Non infected	3	0.577368	-0.792437	5
8h_c3_NI	TIMP1	20.3301	8	Non infected	Non infected	3	0.141513	-2.82099	2
8h_c3_NI	RSAD2	16.1002	8	Non infected	Non infected	3	3.83759	1.9402	6
8h_c3_NI	CIITA	14.8486	8	Non infected	Non infected	3	2.24922	1.16942	1
8h_c3_NI	STING	21.0922	8	Non infected	Non infected	3	0.127948	-2.96637	7
8h_c3_NI	HSP70.2	22.8576	8	Non infected	Non infected	3	1.47844	0.56408	6
8h_c3_NI	CASP3	15.8195	8	Non infected	Non infected	3	0.776179	-0.365539	1
8h_c3_NI	CXCL2	13.4434	8	Non infected	Non infected	3	0.258508	-1.95172	3
8h_c3_NI	IFNAR1	14.6685	8	Non infected	Non infected	3	1.12288	0.167209	1
8h_c3_NI	IL1B	17.1066	8	Non infected	Non infected	3	0.292415	-1.77391	2
8h_c3_NI	IRF3	15.4272	8	Non infected	Non infected	3	1.44118	0.527253	1
8h_c3_NI	MX1	14.9665	8	Non infected	Non infected	3	3.59377	1.8455	6
8h_c3_NI	SCNN1B	999	8	Non infected	Non infected	3	1.66156e-199	-660.331
8h_c3_NI	TLR3	18.4438	8	Non infected	Non infected	3	0.420795	-1.24881	8
8h_c3_NI	VNN2	18.7898	8	Non infected	Non infected	3	0.227009	-2.13918	7
8h_c3_NI	SIGLEC1	13.4485	8	Non infected	Non infected	3	1.75572	0.812065	1
8h_c3_NI	BANF1	13.0928	8	Non infected	Non infected	3	1.04635	0.06537	1
8h_c3_NI	SOCS3	999	8	Non infected	Non infected	3	1.36408e-101	-335.067
8h_c3_NI	CCL2	17.4515	8	Non infected	Non infected	3	0.431821	-1.21149	3
8h_c3_NI	CXCL8	13.0954	8	Non infected	Non infected	3	0.462859	-1.11135	3
8h_c3_NI	IL1RN	17.1087	8	Non infected	Non infected	3	1.84017	0.879837	5
8h_c3_NI	ISG15	13.6437	8	Non infected	Non infected	3	3.98836	1.9958	6
8h_c3_NI	MYD88	13.2828	8	Non infected	Non infected	3	1.26796	0.342507	1
8h_c3_NI	SIKE1	17.2121	8	Non infected	Non infected	3	0.808337	-0.306972	7
8h_c3_NI	TLR4	12.7281	8	Non infected	Non infected	3	1.09693	0.133472	1
8h_c3_NI	RAB1B	14.5396	8	Non infected	Non infected	3	1.26237	0.336134	1
8h_c3_NI	AXL	15.3005	8	Non infected	Non infected	3	1.39248	0.477652	5
8h_c3_NI	OAS1	12.5256	8	Non infected	Non infected	3	1.66772	0.737878	5
8h_c3_NI	TLR5	999	8	Non infected	Non infected	3	1.89124e-297	-985.693
8h_c3_NI	CCL20	21.8774	8	Non infected	Non infected	3	1.87637	0.907948	3
8h_c3_NI	DDIT3	15.1807	8	Non infected	Non infected	3	1.26197	0.335676	1
8h_c3_NI	IFNG	23.4581	8	Non infected	Non infected	3	0.278874	-1.84231
8h_c3_NI	IL23	23.4716	8	Non infected	Non infected	3	0.116211	-3.10519	2
8h_c3_NI	KDM6B	16.3276	8	Non infected	Non infected	3	1.29348	0.371259	1
8h_c3_NI	NFKB1	13.4565	8	Non infected	Non infected	3	0.637674	-0.64911	5
8h_c3_NI	STAT2	15.5004	8	Non infected	Non infected	3	1.09606	0.132321	5
8h_c3_NI	TLR7	16.5607	8	Non infected	Non infected	3	0.653911	-0.612835	7
8h_c3_NI	SLA-DMB	13.3773	8	Non infected	Non infected	3	1.23072	0.299497	1
8h_c3_NI	ZBP1	15.8631	8	Non infected	Non infected	3	2.4035	1.26513	6
8h_c3_NI	CXCL9	999	8	Non infected	Non infected	3	0.000931796	-10.0677
8h_c3_NI	CGAS	16.7674	8	Non infected	Non infected	3	1.06818	0.0951491	5
8h_c3_NI	NFKBIE	15.83	8	Non infected	Non infected	3	1.11283	0.15423	1
8h_c3_NI	MAP3K7	16.4963	8	Non infected	Non infected	3	1.69827	0.764066	1
8h_c3_NI	IL27	19.9518	8	Non infected	Non infected	3	0.891546	-0.16562	8
8h_c3_NI	IFNGR1	13.164	8	Non infected	Non infected	3	1.2891	0.366359	1
8h_c3_NI	EIF2AK2	14.015	8	Non infected	Non infected	3	2.15965	1.1108	6
8h_c3_NI	CCL4	17.1141	8	Non infected	Non infected	3	0.734704	-0.444765	3
8h_c3_NI	SLA-DMA	13.5658	8	Non infected	Non infected	3	0.982194	-0.02592	1
8h_c3_NI	CXCL10	19.4823	8	Non infected	Non infected	3	0.686242	-0.543211	6
8h_c3_NI	CD163	12.4494	8	Non infected	Non infected	3	0.481269	-1.05509	1
8h_c3_NI	PKR	13.9254	8	Non infected	Non infected	3	2.07861	1.05562
8h_c3_NI	TNF	16.6235	8	Non infected	Non infected	3	2.06658	1.04724	6
8h_c3_NI	TBK1	14.9539	8	Non infected	Non infected	3	1.14781	0.198878	1
8h_c3_NI	NFKBIZ	15.4725	8	Non infected	Non infected	3	0.433683	-1.20529	8
8h_c3_NI	MAPK1	12.9815	8	Non infected	Non infected	3	1.90488	0.929704	1
8h_c3_NI	IL4R	14.6219	8	Non infected	Non infected	3	0.624968	-0.678146	1
8h_c3_NI	IL10	22.3383	8	Non infected	Non infected	3	7.08996e+97	325.053
8h_c3_NI	HSPA5	12.8974	8	Non infected	Non infected	3	0.872798	-0.19628	5
8h_c3_NI	CD14	16.9075	8	Non infected	Non infected	3	0.791201	-0.337883	1
8h_c3_NI	PRKDC	19.6939	8	Non infected	Non infected	3	3.04334	1.60566	4
8h_c3_NI	B2M	9.43722	8	Non infected	Non infected	3	0.550516	-0.861144	3
8h_c3_NI	TIMD4	999	8	Non infected	Non infected	3	0.000931796	-10.0677
8h_c3_NI	IFI16	20.823	8	Non infected	Non infected	3	0.418869	-1.25543	8
8h_c3_NI	TNFAIP3	13.8234	8	Non infected	Non infected	3	1.06687	0.0933889	5
8h_c3_NI	TGFB1	12.09	8	Non infected	Non infected	3	1.44914	0.535201	1
8h_c3_NI	PBD-2	999	8	Non infected	Non infected	3	0.000931796	-10.0677
8h_c3_NI	MAVS	17.5646	8	Non infected	Non infected	3	1.06503	0.0908903	1
8h_c3_NI	IL7	19.2531	8	Non infected	Non infected	3	0.487471	-1.03661	7
8h_c3_NI	IL16	16.5033	8	Non infected	Non infected	3	0.816576	-0.292341	7
8h_c3_NI	IFNB1	999	8	Non infected	Non infected	3	1.56509e-297	-985.966	6
8h_c3_NI	CD4	21.8635	8	Non infected	Non infected	3	1.65958e+98	326.28
8h_c3_NI	TLR9	999	8	Non infected	Non infected	3	1.15207e-199	-660.859
8h_c3_NI	GAPDH	9.85811	8	Non infected	Non infected	3	1.00159	0.00229355
8h_c3_NI	NLRP3	999	8	Non infected	Non infected	3	7.1408e-298	-987.098	2
8h_c3_NI	SLFN11	17.3084	8	Non infected	Non infected	3	1.63317	0.707672	6
8h_c3_NI	TNFS10	17.1958	8	Non infected	Non infected	3	2.87131	1.52171	6
8h_c3_NI	TGFBR1	13.7596	8	Non infected	Non infected	3	1.49965	0.584626	1
8h_c3_NI	RIGI	14.8131	8	Non infected	Non infected	3	1.71298	0.776511	6
8h_c3_NI	MCU	18.0021	8	Non infected	Non infected	3	2.10472	1.07363	4
8h_c3_NI	IRAK1	15.5294	8	Non infected	Non infected	3	1.98033	0.985738	1
8h_c3_NI	IL18	18.4601	8	Non infected	Non infected	3	0.151469	-2.72291	7
8h_c3_NI	IFIT1	16.6434	8	Non infected	Non infected	3	1.2662	0.340507	6
8h_c3_NI	CSF2	21.3823	8	Non infected	Non infected	3	0.21691	-2.20483	2
8h_c3_NI	SOD2	11.5425	8	Non infected	Non infected	3	0.514573	-0.958552	1
8h_c3_NI	RPL19	11.0389	8	Non infected	Non infected	3	1.0245	0.0349252
8h_c3_NI	SNX32	23.7726	8	Non infected	Non infected	3	1.16607e+97	322.449
8h_c3_NI	RXFAP	18.3049	8	Non infected	Non infected	3	1.14822	0.199395	1
8h_c3_NI	UNC93B1	13.4216	8	Non infected	Non infected	3	1.25775	0.330846	6
8h_c3_NI	TGIF2	19.8872	8	Non infected	Non infected	3	0.544752	-0.87633	8
48h_c1_L60_1.5	C3	13.9575	48	L60	Virulent	1	0.42384	-1.23841	1
48h_c1_L60_1.5	CSF3	21.0818	48	L60	Virulent	1	1.92836	0.947375	2
48h_c1_L60_1.5	IL1A	16.2805	48	L60	Virulent	1	0.402708	-1.31219	3
48h_c1_L60_1.5	IRAK4	17.9576	48	L60	Virulent	1	0.30725	-1.70251	1
48h_c1_L60_1.5	IFNA1	999	48	L60	Virulent	1	6.15214e-298	-987.313	4
48h_c1_L60_1.5	SAMHD1	17.634	48	L60	Virulent	1	0.899285	-0.15315	5
48h_c1_L60_1.5	TIMP1	18.601	48	L60	Virulent	1	1.083	0.115027	2
48h_c1_L60_1.5	RSAD2	19.1753	48	L60	Virulent	1	1.05112	0.0719262	6
48h_c1_L60_1.5	CIITA	20.1573	48	L60	Virulent	1	0.130993	-2.93244	1
48h_c1_L60_1.5	STING	20.8935	48	L60	Virulent	1	0.338971	-1.56077	7
48h_c1_L60_1.5	HSP70.2	25.2199	48	L60	Virulent	1	0.663749	-0.591291	6
48h_c1_L60_1.5	CASP3	18.364	48	L60	Virulent	1	0.307128	-1.70309	1
48h_c1_L60_1.5	CXCL2	13.6181	48	L60	Virulent	1	0.528714	-0.919441	3
48h_c1_L60_1.5	IFNAR1	19.4184	48	L60	Virulent	1	0.0963312	-3.37585	1
48h_c1_L60_1.5	IL1B	16.3334	48	L60	Virulent	1	1.15356	0.206092	2
48h_c1_L60_1.5	IRF3	18.6915	48	L60	Virulent	1	0.346223	-1.53023	1
48h_c1_L60_1.5	MX1	18.5379	48	L60	Virulent	1	0.697838	-0.519036	6
48h_c1_L60_1.5	SCNN1B	999	48	L60	Virulent	1	1.66156e-199	-660.331
48h_c1_L60_1.5	TLR3	19.0914	48	L60	Virulent	1	0.620028	-0.689595	8
48h_c1_L60_1.5	VNN2	20.4571	48	L60	Virulent	1	0.164989	-2.59956	7
48h_c1_L60_1.5	SIGLEC1	17.0217	48	L60	Virulent	1	0.340493	-1.5543	1
48h_c1_L60_1.5	BANF1	15.5154	48	L60	Virulent	1	0.45054	-1.15027	1
48h_c1_L60_1.5	SOCS3	999	48	L60	Virulent	1	1.36408e-101	-335.067
48h_c1_L60_1.5	CCL2	18.4575	48	L60	Virulent	1	0.496343	-1.01059	3
48h_c1_L60_1.5	CXCL8	13.2062	48	L60	Virulent	1	0.989509	-0.0152145	3
48h_c1_L60_1.5	IL1RN	21.0749	48	L60	Virulent	1	0.271771	-1.87954	5
48h_c1_L60_1.5	ISG15	16.8295	48	L60	Virulent	1	1.01182	0.0169507	6
48h_c1_L60_1.5	MYD88	16.559	48	L60	Virulent	1	0.302117	-1.72682	1
48h_c1_L60_1.5	SIKE1	20.2366	48	L60	Virulent	1	0.229317	-2.12459	7
48h_c1_L60_1.5	TLR4	18.4136	48	L60	Virulent	1	0.0492	-4.3452	1
48h_c1_L60_1.5	RAB1B	17.572	48	L60	Virulent	1	0.356171	-1.48936	1
48h_c1_L60_1.5	AXL	19.9082	48	L60	Virulent	1	0.131836	-2.92318	5
48h_c1_L60_1.5	OAS1	15.7669	48	L60	Virulent	1	0.407103	-1.29653	5
48h_c1_L60_1.5	TLR5	999	48	L60	Virulent	1	1.89124e-297	-985.693
48h_c1_L60_1.5	CCL20	21.115	48	L60	Virulent	1	7.3477	2.87729	3
48h_c1_L60_1.5	DDIT3	20.9052	48	L60	Virulent	1	0.0550968	-4.18189	1
48h_c1_L60_1.5	IFNG	23.9382	48	L60	Virulent	1	0.461525	-1.11552
48h_c1_L60_1.5	IL23	20.3079	48	L60	Virulent	1	2.40385	1.26535	2
48h_c1_L60_1.5	KDM6B	19.6735	48	L60	Virulent	1	0.293663	-1.76777	1
48h_c1_L60_1.5	NFKB1	16.7139	48	L60	Virulent	1	0.153941	-2.69955	5
48h_c1_L60_1.5	STAT2	18.167	48	L60	Virulent	1	0.398487	-1.3274	5
48h_c1_L60_1.5	TLR7	20.5981	48	L60	Virulent	1	0.0919284	-3.44335	7
48h_c1_L60_1.5	SLA-DMB	16.3654	48	L60	Virulent	1	0.358069	-1.48169	1
48h_c1_L60_1.5	ZBP1	18.287	48	L60	Virulent	1	1.03395	0.0481686	6
48h_c1_L60_1.5	CXCL9	999	48	L60	Virulent	1	0.000931796	-10.0677
48h_c1_L60_1.5	CGAS	22.0768	48	L60	Virulent	1	0.062181	-4.00738	5
48h_c1_L60_1.5	NFKBIE	19.5876	48	L60	Virulent	1	0.189928	-2.39647	1
48h_c1_L60_1.5	MAP3K7	20.2326	48	L60	Virulent	1	0.294173	-1.76527	1
48h_c1_L60_1.5	IL27	23.6794	48	L60	Virulent	1	0.155361	-2.68631	8
48h_c1_L60_1.5	IFNGR1	17.3458	48	L60	Virulent	1	0.163956	-2.60862	1
48h_c1_L60_1.5	EIF2AK2	15.8429	48	L60	Virulent	1	1.40424	0.489787	6
48h_c1_L60_1.5	CCL4	17.4923	48	L60	Virulent	1	1.30487	0.383903	3
48h_c1_L60_1.5	SLA-DMA	16.8488	48	L60	Virulent	1	0.232938	-2.10198	1
48h_c1_L60_1.5	CXCL10	999	48	L60	Virulent	1	6.71369e-299	-990.509	6
48h_c1_L60_1.5	CD163	16.0166	48	L60	Virulent	1	0.0937254	-3.41542	1
48h_c1_L60_1.5	PKR	15.5354	48	L60	Virulent	1	1.57197	0.652571
48h_c1_L60_1.5	TNF	19.221	48	L60	Virulent	1	0.788226	-0.343318	6
48h_c1_L60_1.5	TBK1	19.0807	48	L60	Virulent	1	0.15167	-2.72099	1
48h_c1_L60_1.5	NFKBIZ	17.2159	48	L60	Virulent	1	0.298982	-1.74187	8
48h_c1_L60_1.5	MAPK1	17.0767	48	L60	Virulent	1	0.257276	-1.95861	1
48h_c1_L60_1.5	IL4R	19.2879	48	L60	Virulent	1	0.0568306	-4.13719	1
48h_c1_L60_1.5	IL10	999	48	L60	Virulent	1	5.02176e-200	-662.057
48h_c1_L60_1.5	HSPA5	16.7501	48	L60	Virulent	1	0.139456	-2.84212	5
48h_c1_L60_1.5	CD14	20.3103	48	L60	Virulent	1	0.172682	-2.53381	1
48h_c1_L60_1.5	PRKDC	999	48	L60	Virulent	1	3.44779e-298	-988.149	4
48h_c1_L60_1.5	B2M	10.1681	48	L60	Virulent	1	0.765732	-0.385089	3
48h_c1_L60_1.5	TIMD4	999	48	L60	Virulent	1	0.000931796	-10.0677
48h_c1_L60_1.5	IFI16	22.091	48	L60	Virulent	1	0.401488	-1.31657	8
48h_c1_L60_1.5	TNFAIP3	16.5357	48	L60	Virulent	1	0.375766	-1.41209	5
48h_c1_L60_1.5	TGFB1	14.6325	48	L60	Virulent	1	0.574184	-0.800416	1
48h_c1_L60_1.5	PBD-2	999	48	L60	Virulent	1	0.000931796	-10.0677
48h_c1_L60_1.5	MAVS	19.7497	48	L60	Virulent	1	0.54063	-0.887286	1
48h_c1_L60_1.5	IL7	21.8581	48	L60	Virulent	1	0.184967	-2.43466	7
48h_c1_L60_1.5	IL16	20.3658	48	L60	Virulent	1	0.129594	-2.94793	7
48h_c1_L60_1.5	IFNB1	22.0465	48	L60	Virulent	1	6.24411	2.6425	6
48h_c1_L60_1.5	CD4	999	48	L60	Virulent	1	8.45853e-200	-661.305
48h_c1_L60_1.5	TLR9	21.9857	48	L60	Virulent	1	4.79425e+98	327.81
48h_c1_L60_1.5	GAPDH	11.2667	48	L60	Virulent	1	0.870879	-0.199455
48h_c1_L60_1.5	NLRP3	23.4323	48	L60	Virulent	1	1.09017	0.124555	2
48h_c1_L60_1.5	SLFN11	21.5594	48	L60	Virulent	1	0.197994	-2.33647	6
48h_c1_L60_1.5	TNFS10	22.0141	48	L60	Virulent	1	0.234932	-2.08968	6
48h_c1_L60_1.5	TGFBR1	17.7028	48	L60	Virulent	1	0.225045	-2.15171	1
48h_c1_L60_1.5	RIGI	18.3236	48	L60	Virulent	1	0.346971	-1.52711	6
48h_c1_L60_1.5	MCU	19.1395	48	L60	Virulent	1	2.20864	1.14316	4
48h_c1_L60_1.5	IRAK1	18.5538	48	L60	Virulent	1	0.561812	-0.83184	1
48h_c1_L60_1.5	IL18	18.6099	48	L60	Virulent	1	0.315164	-1.66583	7
48h_c1_L60_1.5	IFIT1	19.2532	48	L60	Virulent	1	0.478843	-1.06238	6
48h_c1_L60_1.5	CSF2	19.6879	48	L60	Virulent	1	1.62049	0.696431	2
48h_c1_L60_1.5	SOD2	13.6908	48	L60	Virulent	1	0.267955	-1.89994	1
48h_c1_L60_1.5	RPL19	12.044	48	L60	Virulent	1	1.17827	0.236674
48h_c1_L60_1.5	SNX32	20.0477	48	L60	Virulent	1	3.55914e+98	327.38
48h_c1_L60_1.5	RXFAP	20.8451	48	L60	Virulent	1	0.455661	-1.13397	1
48h_c1_L60_1.5	UNC93B1	15.9972	48	L60	Virulent	1	0.487063	-1.03782	6
48h_c1_L60_1.5	TGIF2	999	48	L60	Virulent	1	7.05611e-299	-990.438	8
4h_c2_881_0.5	C3	11.9425	4	OURT88/1	Virulent	2	0.565396	-0.822667	1
4h_c2_881_0.5	CSF3	17.5517	4	OURT88/1	Virulent	2	7.35181	2.8781	2
4h_c2_881_0.5	IL1A	14.4605	4	OURT88/1	Virulent	2	0.469252	-1.09157	3
4h_c2_881_0.5	IRAK4	15.8873	4	OURT88/1	Virulent	2	0.425867	-1.23153	1
4h_c2_881_0.5	IFNA1	22.5258	4	OURT88/1	Virulent	2	0.581058	-0.783247	4
4h_c2_881_0.5	SAMHD1	15.505	4	OURT88/1	Virulent	2	1.29817	0.376475	5
4h_c2_881_0.5	TIMP1	17.1287	4	OURT88/1	Virulent	2	0.991707	-0.0120134	2
4h_c2_881_0.5	RSAD2	17.9318	4	OURT88/1	Virulent	2	0.821415	-0.283817	6
4h_c2_881_0.5	CIITA	16.7371	4	OURT88/1	Virulent	2	0.462803	-1.11153	1
4h_c2_881_0.5	STING	17.9308	4	OURT88/1	Virulent	2	0.872122	-0.197398	7
4h_c2_881_0.5	HSP70.2	22.4824	4	OURT88/1	Virulent	2	1.46093	0.546884	6
4h_c2_881_0.5	CASP3	16.0504	4	OURT88/1	Virulent	2	0.503894	-0.988808	1
4h_c2_881_0.5	CXCL2	11.5847	4	OURT88/1	Virulent	2	0.714277	-0.485444	3
4h_c2_881_0.5	IFNAR1	15.5132	4	OURT88/1	Virulent	2	0.476345	-1.06992	1
4h_c2_881_0.5	IL1B	14.2275	4	OURT88/1	Virulent	2	1.63887	0.712701	2
4h_c2_881_0.5	IRF3	16.5954	4	OURT88/1	Virulent	2	0.488568	-1.03337	1
4h_c2_881_0.5	MX1	17.6498	4	OURT88/1	Virulent	2	0.426233	-1.23028	6
4h_c2_881_0.5	SCNN1B	999	4	OURT88/1	Virulent	2	1.66156e-199	-660.331
4h_c2_881_0.5	TLR3	17.7887	4	OURT88/1	Virulent	2	0.504825	-0.986145	8
4h_c2_881_0.5	VNN2	15.3151	4	OURT88/1	Virulent	2	1.9227	0.943131	7
4h_c2_881_0.5	SIGLEC1	14.3316	4	OURT88/1	Virulent	2	0.725232	-0.463486	1
4h_c2_881_0.5	BANF1	12.681	4	OURT88/1	Virulent	2	1.06049	0.084729	1
4h_c2_881_0.5	SOCS3	999	4	OURT88/1	Virulent	2	1.36408e-101	-335.067
4h_c2_881_0.5	CCL2	13.6469	4	OURT88/1	Virulent	2	4.59703	2.2007	3
4h_c2_881_0.5	CXCL8	11.182	4	OURT88/1	Virulent	2	1.32839	0.409675	3
4h_c2_881_0.5	IL1RN	17.4302	4	OURT88/1	Virulent	2	1.12187	0.165909	5
4h_c2_881_0.5	ISG15	16.0848	4	OURT88/1	Virulent	2	0.559536	-0.837698	6
4h_c2_881_0.5	MYD88	13.7903	4	OURT88/1	Virulent	2	0.679497	-0.55746	1
4h_c2_881_0.5	SIKE1	16.6914	4	OURT88/1	Virulent	2	0.883512	-0.178679	7
4h_c2_881_0.5	TLR4	12.8032	4	OURT88/1	Virulent	2	0.793278	-0.334101	1
4h_c2_881_0.5	RAB1B	14.8138	4	OURT88/1	Virulent	2	0.795294	-0.33044	1
4h_c2_881_0.5	AXL	16.8248	4	OURT88/1	Virulent	2	0.368811	-1.43904	5
4h_c2_881_0.5	OAS1	14.8653	4	OURT88/1	Virulent	2	0.251008	-1.99419	5
4h_c2_881_0.5	TLR5	999	4	OURT88/1	Virulent	2	1.89124e-297	-985.693
4h_c2_881_0.5	CCL20	18.3228	4	OURT88/1	Virulent	2	16.7969	4.07012	3
4h_c2_881_0.5	DDIT3	14.9432	4	OURT88/1	Virulent	2	1.13345	0.180724	1
4h_c2_881_0.5	IFNG	24.6654	4	OURT88/1	Virulent	2	0.0920128	-3.44202
4h_c2_881_0.5	IL23	18.5159	4	OURT88/1	Virulent	2	2.74746	1.4581	2
4h_c2_881_0.5	KDM6B	17.0939	4	OURT88/1	Virulent	2	0.579349	-0.787495	1
4h_c2_881_0.5	NFKB1	12.9406	4	OURT88/1	Virulent	2	0.694692	-0.525554	5
4h_c2_881_0.5	STAT2	15.8969	4	OURT88/1	Virulent	2	0.634358	-0.656631	5
4h_c2_881_0.5	TLR7	15.7896	4	OURT88/1	Virulent	2	0.850173	-0.234171	7
4h_c2_881_0.5	SLA-DMB	13.9275	4	OURT88/1	Virulent	2	0.640345	-0.643078	1
4h_c2_881_0.5	ZBP1	17.463	4	OURT88/1	Virulent	2	0.604099	-0.727142	6
4h_c2_881_0.5	CXCL9	999	4	OURT88/1	Virulent	2	0.000931796	-10.0677
4h_c2_881_0.5	CGAS	19.4213	4	OURT88/1	Virulent	2	0.129303	-2.95117	5
4h_c2_881_0.5	NFKBIE	15.6481	4	OURT88/1	Virulent	2	0.961761	-0.05625	1
4h_c2_881_0.5	MAP3K7	17.2985	4	OURT88/1	Virulent	2	0.742	-0.430508	1
4h_c2_881_0.5	IL27	19.7702	4	OURT88/1	Virulent	2	0.770338	-0.376436	8
4h_c2_881_0.5	IFNGR1	13.5277	4	OURT88/1	Virulent	2	0.763217	-0.389835	1
4h_c2_881_0.5	EIF2AK2	15.4559	4	OURT88/1	Virulent	2	0.606052	-0.722486	6
4h_c2_881_0.5	CCL4	13.6628	4	OURT88/1	Virulent	2	6.12235	2.61409	3
4h_c2_881_0.5	SLA-DMA	14.1509	4	OURT88/1	Virulent	2	0.498829	-1.00338	1
4h_c2_881_0.5	CXCL10	20.7403	4	OURT88/1	Virulent	2	0.218608	-2.19358	6
4h_c2_881_0.5	CD163	11.2997	4	OURT88/1	Virulent	2	0.813512	-0.297765	1
4h_c2_881_0.5	PKR	15.2887	4	OURT88/1	Virulent	2	0.615559	-0.70003
4h_c2_881_0.5	TNF	17.523	4	OURT88/1	Virulent	2	0.84399	-0.244702	6
4h_c2_881_0.5	TBK1	15.299	4	OURT88/1	Virulent	2	0.688433	-0.538612	1
4h_c2_881_0.5	NFKBIZ	15.0422	4	OURT88/1	Virulent	2	0.445192	-1.1675	8
4h_c2_881_0.5	MAPK1	13.5257	4	OURT88/1	Virulent	2	0.99522	-0.00691226	1
4h_c2_881_0.5	IL4R	14.1605	4	OURT88/1	Virulent	2	0.655589	-0.609136	1
4h_c2_881_0.5	IL10	20.2832	4	OURT88/1	Virulent	2	2.24464e+98	326.715
4h_c2_881_0.5	HSPA5	12.1564	4	OURT88/1	Virulent	2	1.11132	0.152273	5
4h_c2_881_0.5	CD14	15.2504	4	OURT88/1	Virulent	2	1.90099	0.926749	1
4h_c2_881_0.5	PRKDC	21.3241	4	OURT88/1	Virulent	2	0.74902	-0.416924	4
4h_c2_881_0.5	B2M	7.74234	4	OURT88/1	Virulent	2	1.35784	0.441311	3
4h_c2_881_0.5	TIMD4	999	4	OURT88/1	Virulent	2	0.000931796	-10.0677
4h_c2_881_0.5	IFI16	20.5956	4	OURT88/1	Virulent	2	0.373577	-1.42052	8
4h_c2_881_0.5	TNFAIP3	13.6189	4	OURT88/1	Virulent	2	0.936533	-0.0945983	5
4h_c2_881_0.5	TGFB1	12.4238	4	OURT88/1	Virulent	2	0.876033	-0.190943	1
4h_c2_881_0.5	PBD-2	999	4	OURT88/1	Virulent	2	0.000931796	-10.0677
4h_c2_881_0.5	MAVS	18.4209	4	OURT88/1	Virulent	2	0.448183	-1.15784	1
4h_c2_881_0.5	IL7	18.2828	4	OURT88/1	Virulent	2	0.727669	-0.458645	7
4h_c2_881_0.5	IL16	16.472	4	OURT88/1	Virulent	2	0.635775	-0.653413	7
4h_c2_881_0.5	IFNB1	23.2376	4	OURT88/1	Virulent	2	0.902571	-0.147888	6
4h_c2_881_0.5	CD4	999	4	OURT88/1	Virulent	2	8.45853e-200	-661.305
4h_c2_881_0.5	TLR9	24.5485	4	OURT88/1	Virulent	2	2.67791e+97	323.648
4h_c2_881_0.5	GAPDH	9.24946	4	OURT88/1	Virulent	2	1.16354	0.21852
4h_c2_881_0.5	NLRP3	20.2274	4	OURT88/1	Virulent	2	3.31762	1.73015	2
4h_c2_881_0.5	SLFN11	19.6413	4	OURT88/1	Virulent	2	0.246944	-2.01774	6
4h_c2_881_0.5	TNFS10	19.7478	4	OURT88/1	Virulent	2	0.373008	-1.42272	6
4h_c2_881_0.5	TGFBR1	14.1199	4	OURT88/1	Virulent	2	0.889997	-0.168127	1
4h_c2_881_0.5	RIGI	16.1768	4	OURT88/1	Virulent	2	0.50712	-0.9796	6
4h_c2_881_0.5	MCU	18.7704	4	OURT88/1	Virulent	2	0.941436	-0.0870646	4
4h_c2_881_0.5	IRAK1	16.5262	4	OURT88/1	Virulent	2	0.755992	-0.403557	1
4h_c2_881_0.5	IL18	14.5941	4	OURT88/1	Virulent	2	1.68252	0.750624	7
4h_c2_881_0.5	IFIT1	17.4605	4	OURT88/1	Virulent	2	0.547543	-0.868957	6
4h_c2_881_0.5	CSF2	19.215	4	OURT88/1	Virulent	2	0.742275	-0.429974	2
4h_c2_881_0.5	SOD2	9.64171	4	OURT88/1	Virulent	2	1.46394	0.54986	1
4h_c2_881_0.5	RPL19	10.8627	4	OURT88/1	Virulent	2	0.881907	-0.181301
4h_c2_881_0.5	SNX32	21.7982	4	OURT88/1	Virulent	2	3.49112e+97	324.031
4h_c2_881_0.5	RXFAP	18.4969	4	OURT88/1	Virulent	2	0.765731	-0.38509	1
4h_c2_881_0.5	UNC93B1	13.8656	4	OURT88/1	Virulent	2	0.704399	-0.505535	6
4h_c2_881_0.5	TGIF2	18.9475	4	OURT88/1	Virulent	2	0.796071	-0.329031	8
24h_c3_883_0.5	C3	11.8403	24	OURT88/3	Attenuated	3	1.07173	0.0999405	1
24h_c3_883_0.5	CSF3	21.0145	24	OURT88/3	Attenuated	3	1.1776	0.235845	2
24h_c3_883_0.5	IL1A	15.6705	24	OURT88/3	Attenuated	3	0.358219	-1.48108	3
24h_c3_883_0.5	IRAK4	15.9916	24	OURT88/3	Attenuated	3	0.699638	-0.515319	1
24h_c3_883_0.5	IFNA1	23.4169	24	OURT88/3	Attenuated	3	0.553294	-0.853881	4
24h_c3_883_0.5	SAMHD1	17.3727	24	OURT88/3	Attenuated	3	0.628202	-0.670699	5
24h_c3_883_0.5	TIMP1	20.2214	24	OURT88/3	Attenuated	3	0.205301	-2.28419	2
24h_c3_883_0.5	RSAD2	16.1937	24	OURT88/3	Attenuated	3	4.83919	2.27476	6
24h_c3_883_0.5	CIITA	16.8557	24	OURT88/3	Attenuated	3	0.752784	-0.409692	1
24h_c3_883_0.5	STING	20.764	24	OURT88/3	Attenuated	3	0.216121	-2.21009	7
24h_c3_883_0.5	HSP70.2	18.8421	24	OURT88/3	Attenuated	3	32.1705	5.00766	6
24h_c3_883_0.5	CASP3	16.908	24	OURT88/3	Attenuated	3	0.491067	-1.02601	1
24h_c3_883_0.5	CXCL2	13.8228	24	OURT88/3	Attenuated	3	0.267378	-1.90305	3
24h_c3_883_0.5	IFNAR1	16.4109	24	OURT88/3	Attenuated	3	0.451505	-1.14718	1
24h_c3_883_0.5	IL1B	19.0872	24	OURT88/3	Attenuated	3	0.0996849	-3.32648	2
24h_c3_883_0.5	IRF3	16.5735	24	OURT88/3	Attenuated	3	0.87595	-0.19108	1
24h_c3_883_0.5	MX1	15.368	24	OURT88/3	Attenuated	3	3.66039	1.872	6
24h_c3_883_0.5	SCNN1B	999	24	OURT88/3	Attenuated	3	1.66156e-199	-660.331
24h_c3_883_0.5	TLR3	18.3605	24	OURT88/3	Attenuated	3	0.599796	-0.737456	8
24h_c3_883_0.5	VNN2	20.2268	24	OURT88/3	Attenuated	3	0.112804	-3.14811	7
24h_c3_883_0.5	SIGLEC1	14.1262	24	OURT88/3	Attenuated	3	1.47663	0.562311	1
24h_c3_883_0.5	BANF1	13.9092	24	OURT88/3	Attenuated	3	0.799437	-0.322943	1
24h_c3_883_0.5	SOCS3	999	24	OURT88/3	Attenuated	3	1.36408e-101	-335.067
24h_c3_883_0.5	CCL2	18.3688	24	OURT88/3	Attenuated	3	0.307616	-1.7008	3
24h_c3_883_0.5	CXCL8	13.7302	24	OURT88/3	Attenuated	3	0.401059	-1.31811	3
24h_c3_883_0.5	IL1RN	17.7131	24	OURT88/3	Attenuated	3	1.62845	0.703501	5
24h_c3_883_0.5	ISG15	13.8927	24	OURT88/3	Attenuated	3	4.51532	2.17483	6
24h_c3_883_0.5	MYD88	14.5869	24	OURT88/3	Attenuated	3	0.690841	-0.533574	1
24h_c3_883_0.5	SIKE1	17.9972	24	OURT88/3	Attenuated	3	0.631127	-0.663998	7
24h_c3_883_0.5	TLR4	14.7003	24	OURT88/3	Attenuated	3	0.376133	-1.41069	1
24h_c3_883_0.5	RAB1B	15.5492	24	OURT88/3	Attenuated	3	0.843602	-0.245365	1
24h_c3_883_0.5	AXL	16.8414	24	OURT88/3	Attenuated	3	0.643852	-0.635199	5
24h_c3_883_0.5	OAS1	13.3279	24	OURT88/3	Attenuated	3	1.28667	0.363643	5
24h_c3_883_0.5	TLR5	22.1126	24	OURT88/3	Attenuated	3	4.20067	2.07062
24h_c3_883_0.5	CCL20	999	24	OURT88/3	Attenuated	3	9.65615e-298	-986.663	3
24h_c3_883_0.5	DDIT3	16.7223	24	OURT88/3	Attenuated	3	0.583206	-0.777923	1
24h_c3_883_0.5	IFNG	21.7051	24	OURT88/3	Attenuated	3	1.26461	0.338692
24h_c3_883_0.5	IL23	999	24	OURT88/3	Attenuated	3	1.8056e-298	-989.082	2
24h_c3_883_0.5	KDM6B	17.06	24	OURT88/3	Attenuated	3	1.04742	0.06684	1
24h_c3_883_0.5	NFKB1	14.4128	24	OURT88/3	Attenuated	3	0.442177	-1.17731	5
24h_c3_883_0.5	STAT2	16.549	24	OURT88/3	Attenuated	3	0.712885	-0.488258	5
24h_c3_883_0.5	TLR7	17.6182	24	OURT88/3	Attenuated	3	0.4227	-1.24229	7
24h_c3_883_0.5	SLA-DMB	15.0941	24	OURT88/3	Attenuated	3	0.503746	-0.98923	1
24h_c3_883_0.5	ZBP1	16.8474	24	OURT88/3	Attenuated	3	1.63457	0.708911	6
24h_c3_883_0.5	CXCL9	999	24	OURT88/3	Attenuated	3	0.000931796	-10.0677
24h_c3_883_0.5	CGAS	17.9969	24	OURT88/3	Attenuated	3	0.612901	-0.706274	5
24h_c3_883_0.5	NFKBIE	17.1542	24	OURT88/3	Attenuated	3	0.597962	-0.741875	1
24h_c3_883_0.5	MAP3K7	17.3999	24	OURT88/3	Attenuated	3	1.22137	0.288505	1
24h_c3_883_0.5	IL27	21.1762	24	OURT88/3	Attenuated	3	0.513369	-0.961933	8
24h_c3_883_0.5	IFNGR1	14.2544	24	OURT88/3	Attenuated	3	0.814486	-0.296038	1
24h_c3_883_0.5	EIF2AK2	14.6685	24	OURT88/3	Attenuated	3	1.84726	0.885388	6
24h_c3_883_0.5	CCL4	17.3661	24	OURT88/3	Attenuated	3	0.830074	-0.268688	3
24h_c3_883_0.5	SLA-DMA	14.799	24	OURT88/3	Attenuated	3	0.562134	-0.831014	1
24h_c3_883_0.5	CXCL10	19.9134	24	OURT88/3	Attenuated	3	0.684772	-0.546304	6
24h_c3_883_0.5	CD163	13.4251	24	OURT88/3	Attenuated	3	0.329268	-1.60267	1
24h_c3_883_0.5	PKR	14.491	24	OURT88/3	Attenuated	3	1.88958	0.918068
24h_c3_883_0.5	TNF	18.8779	24	OURT88/3	Attenuated	3	0.582726	-0.77911	6
24h_c3_883_0.5	TBK1	16.3223	24	OURT88/3	Attenuated	3	0.598144	-0.741435	1
24h_c3_883_0.5	NFKBIZ	16.6666	24	OURT88/3	Attenuated	3	0.255008	-1.97138	8
24h_c3_883_0.5	MAPK1	14.5685	24	OURT88/3	Attenuated	3	0.853064	-0.229274	1
24h_c3_883_0.5	IL4R	15.9402	24	OURT88/3	Attenuated	3	0.3372	-1.56832	1
24h_c3_883_0.5	IL10	999	24	OURT88/3	Attenuated	3	5.02176e-200	-662.057
24h_c3_883_0.5	HSPA5	13.3513	24	OURT88/3	Attenuated	3	0.857235	-0.222237	5
24h_c3_883_0.5	CD14	18.6822	24	OURT88/3	Attenuated	3	0.311103	-1.68454	1
24h_c3_883_0.5	PRKDC	20.7192	24	OURT88/3	Attenuated	3	2.0117	1.00842	4
24h_c3_883_0.5	B2M	10.0342	24	OURT88/3	Attenuated	3	0.489676	-1.0301	3
24h_c3_883_0.5	TIMD4	999	24	OURT88/3	Attenuated	3	0.000931796	-10.0677
24h_c3_883_0.5	IFI16	21.4779	24	OURT88/3	Attenuated	3	0.357903	-1.48236	8
24h_c3_883_0.5	TNFAIP3	14.5526	24	OURT88/3	Attenuated	3	0.865872	-0.207775	5
24h_c3_883_0.5	TGFB1	13.1803	24	OURT88/3	Attenuated	3	0.915704	-0.127047	1
24h_c3_883_0.5	PBD-2	999	24	OURT88/3	Attenuated	3	0.000931796	-10.0677
24h_c3_883_0.5	MAVS	19.7022	24	OURT88/3	Attenuated	3	0.325623	-1.61872	1
24h_c3_883_0.5	IL7	21.697	24	OURT88/3	Attenuated	3	0.120536	-3.05247	7
24h_c3_883_0.5	IL16	17.4181	24	OURT88/3	Attenuated	3	0.582733	-0.779094	7
24h_c3_883_0.5	IFNB1	20.7062	24	OURT88/3	Attenuated	3	9.21439	3.20389	6
24h_c3_883_0.5	CD4	24.8253	24	OURT88/3	Attenuated	3	2.86594e+97	323.746
24h_c3_883_0.5	TLR9	24.3659	24	OURT88/3	Attenuated	3	5.36706e+97	324.651
24h_c3_883_0.5	GAPDH	10.1656	24	OURT88/3	Attenuated	3	1.0889	0.122869
24h_c3_883_0.5	NLRP3	999	24	OURT88/3	Attenuated	3	7.1408e-298	-987.098	2
24h_c3_883_0.5	SLFN11	18.6366	24	OURT88/3	Attenuated	3	0.875093	-0.192492	6
24h_c3_883_0.5	TNFS10	18.1782	24	OURT88/3	Attenuated	3	1.95533	0.967412	6
24h_c3_883_0.5	TGFBR1	15.3608	24	OURT88/3	Attenuated	3	0.665025	-0.58852	1
24h_c3_883_0.5	RIGI	15.5833	24	OURT88/3	Attenuated	3	1.35128	0.434327	6
24h_c3_883_0.5	MCU	19.945	24	OURT88/3	Attenuated	3	0.736532	-0.441181	4
24h_c3_883_0.5	IRAK1	16.7451	24	OURT88/3	Attenuated	3	1.1471	0.197996	1
24h_c3_883_0.5	IL18	19.3106	24	OURT88/3	Attenuated	3	0.113013	-3.14544	7
24h_c3_883_0.5	IFIT1	17.3854	24	OURT88/3	Attenuated	3	1.01855	0.0265174	6
24h_c3_883_0.5	CSF2	23.8077	24	OURT88/3	Attenuated	3	0.0543268	-4.20219	2
24h_c3_883_0.5	SOD2	13.0789	24	OURT88/3	Attenuated	3	0.238676	-2.06687	1
24h_c3_883_0.5	RPL19	11.5875	24	OURT88/3	Attenuated	3	0.94236	-0.0856501
24h_c3_883_0.5	SNX32	20.5942	24	OURT88/3	Attenuated	3	1.42028e+98	326.055
24h_c3_883_0.5	RXFAP	19.5471	24	OURT88/3	Attenuated	3	0.653014	-0.614815	1
24h_c3_883_0.5	UNC93B1	14.0541	24	OURT88/3	Attenuated	3	1.09156	0.126394	6
24h_c3_883_0.5	TGIF2	19.7152	24	OURT88/3	Attenuated	3	0.825728	-0.276262	8
24h_c1_NHP_0.5	C3	11.5101	24	NH/P68	Attenuated	1	1.14155	0.190991	1
24h_c1_NHP_0.5	CSF3	22.5211	24	NH/P68	Attenuated	1	0.351122	-1.50996	2
24h_c1_NHP_0.5	IL1A	15.9612	24	NH/P68	Attenuated	1	0.248116	-2.01091	3
24h_c1_NHP_0.5	IRAK4	15.4896	24	NH/P68	Attenuated	1	0.839488	-0.252419	1
24h_c1_NHP_0.5	IFNA1	23.3997	24	NH/P68	Attenuated	1	0.474406	-1.0758	4
24h_c1_NHP_0.5	SAMHD1	17.2032	24	NH/P68	Attenuated	1	0.598594	-0.740351	5
24h_c1_NHP_0.5	TIMP1	18.1827	24	NH/P68	Attenuated	1	0.714661	-0.484668	2
24h_c1_NHP_0.5	RSAD2	14.0653	24	NH/P68	Attenuated	1	17.9264	4.16402	6
24h_c1_NHP_0.5	CIITA	16.9295	24	NH/P68	Attenuated	1	0.605978	-0.722662	1
24h_c1_NHP_0.5	STING	20.0604	24	NH/P68	Attenuated	1	0.298213	-1.74559	7
24h_c1_NHP_0.5	HSP70.2	19.2215	24	NH/P68	Attenuated	1	20.953	4.38908	6
24h_c1_NHP_0.5	CASP3	16.5748	24	NH/P68	Attenuated	1	0.524172	-0.931887	1
24h_c1_NHP_0.5	CXCL2	13.6243	24	NH/P68	Attenuated	1	0.259962	-1.94363	3
24h_c1_NHP_0.5	IFNAR1	15.6154	24	NH/P68	Attenuated	1	0.663941	-0.590873	1
24h_c1_NHP_0.5	IL1B	18.7689	24	NH/P68	Attenuated	1	0.105302	-3.2474	2
24h_c1_NHP_0.5	IRF3	16.6744	24	NH/P68	Attenuated	1	0.69205	-0.531052	1
24h_c1_NHP_0.5	MX1	14.2733	24	NH/P68	Attenuated	1	6.62341	2.72757	6
24h_c1_NHP_0.5	SCNN1B	999	24	NH/P68	Attenuated	1	1.66156e-199	-660.331
24h_c1_NHP_0.5	TLR3	17.3756	24	NH/P68	Attenuated	1	1.00576	0.00828407	8
24h_c1_NHP_0.5	VNN2	17.2579	24	NH/P68	Attenuated	1	0.748256	-0.418397	7
24h_c1_NHP_0.5	SIGLEC1	14.2309	24	NH/P68	Attenuated	1	1.16352	0.218496	1
24h_c1_NHP_0.5	BANF1	13.6996	24	NH/P68	Attenuated	1	0.78322	-0.352511	1
24h_c1_NHP_0.5	SOCS3	999	24	NH/P68	Attenuated	1	1.36408e-101	-335.067
24h_c1_NHP_0.5	CCL2	18.3394	24	NH/P68	Attenuated	1	0.265989	-1.91056	3
24h_c1_NHP_0.5	CXCL8	13.6436	24	NH/P68	Attenuated	1	0.360831	-1.4706	3
24h_c1_NHP_0.5	IL1RN	18.0774	24	NH/P68	Attenuated	1	1.07182	0.100058	5
24h_c1_NHP_0.5	ISG15	13.4342	24	NH/P68	Attenuated	1	5.25708	2.39426	6
24h_c1_NHP_0.5	MYD88	14.2578	24	NH/P68	Attenuated	1	0.735263	-0.443667	1
24h_c1_NHP_0.5	SIKE1	17.8987	24	NH/P68	Attenuated	1	0.572492	-0.804672	7
24h_c1_NHP_0.5	TLR4	14.3404	24	NH/P68	Attenuated	1	0.408967	-1.28994	1
24h_c1_NHP_0.5	RAB1B	15.2142	24	NH/P68	Attenuated	1	0.901525	-0.149561	1
24h_c1_NHP_0.5	AXL	16.1985	24	NH/P68	Attenuated	1	0.851798	-0.231416	5
24h_c1_NHP_0.5	OAS1	12.711	24	NH/P68	Attenuated	1	1.67172	0.741334	5
24h_c1_NHP_0.5	TLR5	999	24	NH/P68	Attenuated	1	1.89124e-297	-985.693
24h_c1_NHP_0.5	CCL20	999	24	NH/P68	Attenuated	1	9.65615e-298	-986.663	3
24h_c1_NHP_0.5	DDIT3	16.6276	24	NH/P68	Attenuated	1	0.527675	-0.92228	1
24h_c1_NHP_0.5	IFNG	22.596	24	NH/P68	Attenuated	1	0.577823	-0.791299
24h_c1_NHP_0.5	IL23	23.1203	24	NH/P68	Attenuated	1	0.168985	-2.56503	2
24h_c1_NHP_0.5	KDM6B	17.5579	24	NH/P68	Attenuated	1	0.628417	-0.670207	1
24h_c1_NHP_0.5	NFKB1	14.328	24	NH/P68	Attenuated	1	0.397322	-1.33162	5
24h_c1_NHP_0.5	STAT2	16.0625	24	NH/P68	Attenuated	1	0.846235	-0.240869	5
24h_c1_NHP_0.5	TLR7	16.4896	24	NH/P68	Attenuated	1	0.783062	-0.352802	7
24h_c1_NHP_0.5	SLA-DMB	14.3412	24	NH/P68	Attenuated	1	0.719204	-0.475527	1
24h_c1_NHP_0.5	ZBP1	15.1399	24	NH/P68	Attenuated	1	4.52288	2.17724	6
24h_c1_NHP_0.5	CXCL9	999	24	NH/P68	Attenuated	1	0.000931796	-10.0677
24h_c1_NHP_0.5	CGAS	16.286	24	NH/P68	Attenuated	1	1.69989	0.765445	5
24h_c1_NHP_0.5	NFKBIE	16.5809	24	NH/P68	Attenuated	1	0.753818	-0.407712	1
24h_c1_NHP_0.5	MAP3K7	17.8324	24	NH/P68	Attenuated	1	0.766778	-0.383119	1
24h_c1_NHP_0.5	IL27	20.5676	24	NH/P68	Attenuated	1	0.663186	-0.592514	8
24h_c1_NHP_0.5	IFNGR1	13.9728	24	NH/P68	Attenuated	1	0.838811	-0.253583	1
24h_c1_NHP_0.5	EIF2AK2	13.9019	24	NH/P68	Attenuated	1	2.66256	1.41281	6
24h_c1_NHP_0.5	CCL4	16.9013	24	NH/P68	Attenuated	1	0.970624	-0.0430153	3
24h_c1_NHP_0.5	SLA-DMA	14.5588	24	NH/P68	Attenuated	1	0.56253	-0.829998	1
24h_c1_NHP_0.5	CXCL10	15.4469	24	NH/P68	Attenuated	1	12.8265	3.68106	6
24h_c1_NHP_0.5	CD163	12.5272	24	NH/P68	Attenuated	1	0.519796	-0.943982	1
24h_c1_NHP_0.5	PKR	13.4992	24	NH/P68	Attenuated	1	3.18374	1.67072
24h_c1_NHP_0.5	TNF	17.8852	24	NH/P68	Attenuated	1	0.98243	-0.0255739	6
24h_c1_NHP_0.5	TBK1	15.9839	24	NH/P68	Attenuated	1	0.640729	-0.642213	1
24h_c1_NHP_0.5	NFKBIZ	16.2297	24	NH/P68	Attenuated	1	0.292479	-1.7736	8
24h_c1_NHP_0.5	MAPK1	14.1838	24	NH/P68	Attenuated	1	0.943583	-0.0837792	1
24h_c1_NHP_0.5	IL4R	15.4981	24	NH/P68	Attenuated	1	0.388122	-1.36542	1
24h_c1_NHP_0.5	IL10	999	24	NH/P68	Attenuated	1	5.02176e-200	-662.057
24h_c1_NHP_0.5	HSPA5	12.7715	24	NH/P68	Attenuated	1	1.0856	0.118498	5
24h_c1_NHP_0.5	CD14	17.6024	24	NH/P68	Attenuated	1	0.557132	-0.843909	1
24h_c1_NHP_0.5	PRKDC	21.6678	24	NH/P68	Attenuated	1	0.883124	-0.179311	4
24h_c1_NHP_0.5	B2M	9.24077	24	NH/P68	Attenuated	1	0.719072	-0.475792	3
24h_c1_NHP_0.5	TIMD4	999	24	NH/P68	Attenuated	1	0.000931796	-10.0677
24h_c1_NHP_0.5	IFI16	20.1107	24	NH/P68	Attenuated	1	0.782255	-0.354289	8
24h_c1_NHP_0.5	TNFAIP3	14.3301	24	NH/P68	Attenuated	1	0.855907	-0.224474	5
24h_c1_NHP_0.5	TGFB1	12.7524	24	NH/P68	Attenuated	1	1.04372	0.0617383	1
24h_c1_NHP_0.5	PBD-2	999	24	NH/P68	Attenuated	1	0.000931796	-10.0677
24h_c1_NHP_0.5	MAVS	18.6252	24	NH/P68	Attenuated	1	0.58205	-0.780785	1
24h_c1_NHP_0.5	IL7	19.198	24	NH/P68	Attenuated	1	0.577313	-0.792573	7
24h_c1_NHP_0.5	IL16	17.3643	24	NH/P68	Attenuated	1	0.51248	-0.964432	7
24h_c1_NHP_0.5	IFNB1	18.483	24	NH/P68	Attenuated	1	36.4531	5.18797	6
24h_c1_NHP_0.5	CD4	999	24	NH/P68	Attenuated	1	8.45853e-200	-661.305
24h_c1_NHP_0.5	TLR9	23.9424	24	NH/P68	Attenuated	1	6.09889e+97	324.836
24h_c1_NHP_0.5	GAPDH	10.0433	24	NH/P68	Attenuated	1	1.00419	0.00602657
24h_c1_NHP_0.5	NLRP3	22.1349	24	NH/P68	Attenuated	1	1.32313	0.403958	2
24h_c1_NHP_0.5	SLFN11	16.2347	24	NH/P68	Attenuated	1	3.91816	1.97018	6
24h_c1_NHP_0.5	TNFS10	16.5735	24	NH/P68	Attenuated	1	5.03826	2.33293	6
24h_c1_NHP_0.5	TGFBR1	14.9245	24	NH/P68	Attenuated	1	0.762409	-0.391363	1
24h_c1_NHP_0.5	RIGI	14.5202	24	NH/P68	Attenuated	1	2.39218	1.25833	6
24h_c1_NHP_0.5	MCU	19.7069	24	NH/P68	Attenuated	1	0.736	-0.442222	4
24h_c1_NHP_0.5	IRAK1	16.4591	24	NH/P68	Attenuated	1	1.18498	0.244865	1
24h_c1_NHP_0.5	IL18	17.2794	24	NH/P68	Attenuated	1	0.391393	-1.35331	7
24h_c1_NHP_0.5	IFIT1	14.5163	24	NH/P68	Attenuated	1	6.30491	2.65648	6
24h_c1_NHP_0.5	CSF2	23.1289	24	NH/P68	Attenuated	1	0.0736793	-3.7626	2
24h_c1_NHP_0.5	SOD2	12.1972	24	NH/P68	Attenuated	1	0.372587	-1.42435	1
24h_c1_NHP_0.5	RPL19	11.2315	24	NH/P68	Attenuated	1	1.02186	0.0311922
24h_c1_NHP_0.5	SNX32	17.403	24	NH/P68	Attenuated	1	1.09912e+99	329.007
24h_c1_NHP_0.5	RXFAP	19.1095	24	NH/P68	Attenuated	1	0.749319	-0.416348	1
24h_c1_NHP_0.5	UNC93B1	13.8559	24	NH/P68	Attenuated	1	1.06101	0.0854353	6
24h_c1_NHP_0.5	TGIF2	19.622	24	NH/P68	Attenuated	1	0.746277	-0.422218	8
24h_c3_NI	C3	10.8667	24	Non infected	Non infected	3	1.94355	0.958694	1
24h_c3_NI	CSF3	999	24	Non infected	Non infected	3	2.47658e-298	-988.626	2
24h_c3_NI	IL1A	15.305	24	Non infected	Non infected	3	0.426198	-1.2304	3
24h_c3_NI	IRAK4	15.1263	24	Non infected	Non infected	3	1.17701	0.235131	1
24h_c3_NI	IFNA1	22.722	24	Non infected	Non infected	3	0.827165	-0.273753	4
24h_c3_NI	SAMHD1	17.3205	24	Non infected	Non infected	3	0.601495	-0.733376	5
24h_c3_NI	TIMP1	19.8952	24	Non infected	Non infected	3	0.237695	-2.07282	2
24h_c3_NI	RSAD2	20.0165	24	Non infected	Non infected	3	0.315796	-1.66293	6
24h_c3_NI	CIITA	16.1327	24	Non infected	Non infected	3	1.14747	0.198458	1
24h_c3_NI	STING	20.0581	24	Non infected	Non infected	3	0.325565	-1.61898	7
24h_c3_NI	HSP70.2	23.2808	24	Non infected	Non infected	3	1.36993	0.454101	6
24h_c3_NI	CASP3	16.3417	24	Non infected	Non infected	3	0.671535	-0.574465	1
24h_c3_NI	CXCL2	12.8874	24	Non infected	Non infected	3	0.472236	-1.08242	3
24h_c3_NI	IFNAR1	15.237	24	Non infected	Non infected	3	0.940756	-0.0881068	1
24h_c3_NI	IL1B	17.6818	24	Non infected	Non infected	3	0.243857	-2.0359	2
24h_c3_NI	IRF3	16.0926	24	Non infected	Non infected	3	1.12896	0.175	1
24h_c3_NI	MX1	17.2365	24	Non infected	Non infected	3	0.925734	-0.11133	6
24h_c3_NI	SCNN1B	999	24	Non infected	Non infected	3	1.66156e-199	-660.331
24h_c3_NI	TLR3	19.7411	24	Non infected	Non infected	3	0.212734	-2.23288	8
24h_c3_NI	VNN2	19.0056	24	Non infected	Non infected	3	0.242869	-2.04175	7
24h_c3_NI	SIGLEC1	13.8107	24	Non infected	Non infected	3	1.69712	0.763087	1
24h_c3_NI	BANF1	13.7919	24	Non infected	Non infected	3	0.800804	-0.320478	1
24h_c3_NI	SOCS3	999	24	Non infected	Non infected	3	1.36408e-101	-335.067
24h_c3_NI	CCL2	18.0216	24	Non infected	Non infected	3	0.361389	-1.46837	3
24h_c3_NI	CXCL8	13.403	24	Non infected	Non infected	3	0.464673	-1.10571	3
24h_c3_NI	IL1RN	17.7539	24	Non infected	Non infected	3	1.4619	0.547843	5
24h_c3_NI	ISG15	16.6212	24	Non infected	Non infected	3	0.629177	-0.668461	6
24h_c3_NI	MYD88	13.9143	24	Non infected	Non infected	3	1.01695	0.0242513	1
24h_c3_NI	SIKE1	17.5367	24	Non infected	Non infected	3	0.802031	-0.31827	7
24h_c3_NI	TLR4	13.5434	24	Non infected	Non infected	3	0.774518	-0.368628	1
24h_c3_NI	RAB1B	15.2485	24	Non infected	Non infected	3	0.959562	-0.0595516	1
24h_c3_NI	AXL	15.8028	24	Non infected	Non infected	3	1.22143	0.288565	5
24h_c3_NI	OAS1	13.8644	24	Non infected	Non infected	3	0.819232	-0.287656	5
24h_c3_NI	TLR5	999	24	Non infected	Non infected	3	1.89124e-297	-985.693
24h_c3_NI	CCL20	23.4185	24	Non infected	Non infected	3	0.801111	-0.319926	3
24h_c3_NI	DDIT3	15.6708	24	Non infected	Non infected	3	1.11638	0.158822	1
24h_c3_NI	IFNG	999	24	Non infected	Non infected	3	4.29265e-298	-987.833
24h_c3_NI	IL23	22.4106	24	Non infected	Non infected	3	0.301242	-1.73101	2
24h_c3_NI	KDM6B	16.5751	24	Non infected	Non infected	3	1.35375	0.436959	1
24h_c3_NI	NFKB1	13.4944	24	Non infected	Non infected	3	0.771758	-0.37378	5
24h_c3_NI	STAT2	16.0097	24	Non infected	Non infected	3	0.956789	-0.0637272	5
24h_c3_NI	TLR7	17.647	24	Non infected	Non infected	3	0.382639	-1.38594	7
24h_c3_NI	SLA-DMB	14.5904	24	Non infected	Non infected	3	0.659573	-0.600395	1
24h_c3_NI	ZBP1	17.5891	24	Non infected	Non infected	3	0.902758	-0.147588	6
24h_c3_NI	CXCL9	999	24	Non infected	Non infected	3	0.000931796	-10.0677
24h_c3_NI	CGAS	17.4483	24	Non infected	Non infected	3	0.827854	-0.272553	5
24h_c3_NI	NFKBIE	16.2441	24	Non infected	Non infected	3	1.03767	0.0533485	1
24h_c3_NI	MAP3K7	17.6846	24	Non infected	Non infected	3	0.92599	-0.110932	1
24h_c3_NI	IL27	19.6595	24	Non infected	Non infected	3	1.35656	0.439952	8
24h_c3_NI	IFNGR1	13.5777	24	Non infected	Non infected	3	1.20231	0.265815	1
24h_c3_NI	EIF2AK2	15.0816	24	Non infected	Non infected	3	1.28119	0.357486	6
24h_c3_NI	CCL4	18.6056	24	Non infected	Non infected	3	0.324655	-1.62302	3
24h_c3_NI	SLA-DMA	14.5649	24	Non infected	Non infected	3	0.610573	-0.711765	1
24h_c3_NI	CXCL10	21.3668	24	Non infected	Non infected	3	0.230936	-2.11443	6
24h_c3_NI	CD163	12.2921	24	Non infected	Non infected	3	0.666879	-0.584502	1
24h_c3_NI	PKR	14.9384	24	Non infected	Non infected	3	1.27977	0.355879
24h_c3_NI	TNF	17.587	24	Non infected	Non infected	3	1.31674	0.396969	6
24h_c3_NI	TBK1	15.5195	24	Non infected	Non infected	3	0.963582	-0.0535212	1
24h_c3_NI	NFKBIZ	15.7815	24	Non infected	Non infected	3	0.434955	-1.20106	8
24h_c3_NI	MAPK1	13.803	24	Non infected	Non infected	3	1.33923	0.421407	1
24h_c3_NI	IL4R	14.934	24	Non infected	Non infected	3	0.62549	-0.676941	1
24h_c3_NI	IL10	20.9514	24	Non infected	Non infected	3	2.30369e+98	326.753
24h_c3_NI	HSPA5	13.1604	24	Non infected	Non infected	3	0.903665	-0.146139	5
24h_c3_NI	CD14	17.6679	24	Non infected	Non infected	3	0.580344	-0.785019	1
24h_c3_NI	PRKDC	20.8972	24	Non infected	Non infected	3	1.6422	0.715633	4
24h_c3_NI	B2M	10.386	24	Non infected	Non infected	3	0.354366	-1.49669	3
24h_c3_NI	TIMD4	999	24	Non infected	Non infected	3	0.000931796	-10.0677
24h_c3_NI	IFI16	22.5927	24	Non infected	Non infected	3	0.152623	-2.71195	8
24h_c3_NI	TNFAIP3	14.0355	24	Non infected	Non infected	3	1.1443	0.194463	5
24h_c3_NI	TGFB1	12.4823	24	Non infected	Non infected	3	1.37193	0.456204	1
24h_c3_NI	PBD-2	999	24	Non infected	Non infected	3	0.000931796	-10.0677
24h_c3_NI	MAVS	17.806	24	Non infected	Non infected	3	1.11942	0.162753	1
24h_c3_NI	IL7	20.3088	24	Non infected	Non infected	3	0.291378	-1.77904	7
24h_c3_NI	IL16	16.4895	24	Non infected	Non infected	3	1.02438	0.034746	7
24h_c3_NI	IFNB1	999	24	Non infected	Non infected	3	1.56509e-297	-985.966	6
24h_c3_NI	CD4	26.7669	24	Non infected	Non infected	3	6.89012e+96	321.69
24h_c3_NI	TLR9	999	24	Non infected	Non infected	3	1.15207e-199	-660.859
24h_c3_NI	GAPDH	10.0131	24	Non infected	Non infected	3	1.11773	0.160573
24h_c3_NI	NLRP3	999	24	Non infected	Non infected	3	7.1408e-298	-987.098	2
24h_c3_NI	SLFN11	18.4404	24	Non infected	Non infected	3	0.925871	-0.111116	6
24h_c3_NI	TNFS10	19.8785	24	Non infected	Non infected	3	0.555658	-0.84773	6
24h_c3_NI	TGFBR1	14.5445	24	Non infected	Non infected	3	1.0814	0.112895	1
24h_c3_NI	RIGI	16.5047	24	Non infected	Non infected	3	0.658925	-0.601813	6
24h_c3_NI	MCU	18.6019	24	Non infected	Non infected	3	1.72556	0.787067	4
24h_c3_NI	IRAK1	16.5552	24	Non infected	Non infected	3	1.20842	0.273126	1
24h_c3_NI	IL18	18.78	24	Non infected	Non infected	3	0.150761	-2.72966	7
24h_c3_NI	IFIT1	19.3794	24	Non infected	Non infected	3	0.236148	-2.08224	6
24h_c3_NI	CSF2	22.3471	24	Non infected	Non infected	3	0.138082	-2.85641	2
24h_c3_NI	SOD2	12.4441	24	Non infected	Non infected	3	0.342246	-1.54689	1
24h_c3_NI	RPL19	11.5104	24	Non infected	Non infected	3	0.918051	-0.123354
24h_c3_NI	SNX32	25.0788	24	Non infected	Non infected	3	5.85882e+96	321.456
24h_c3_NI	RXFAP	18.1523	24	Non infected	Non infected	3	1.5858	0.665213	1
24h_c3_NI	UNC93B1	14.4085	24	Non infected	Non infected	3	0.788523	-0.342775	6
24h_c3_NI	TGIF2	20.1493	24	Non infected	Non infected	3	0.564392	-0.825231	8
72h_c3_NHP_1.5	C3	12.0502	72	NH/P68	Attenuated	3	0.905498	-0.143216	1
72h_c3_NHP_1.5	CSF3	20.0859	72	NH/P68	Attenuated	3	2.19025	1.13109	2
72h_c3_NHP_1.5	IL1A	14.106	72	NH/P68	Attenuated	3	1.03538	0.0501631	3
72h_c3_NHP_1.5	IRAK4	15.0635	72	NH/P68	Attenuated	3	1.30088	0.379492	1
72h_c3_NHP_1.5	IFNA1	20.4916	72	NH/P68	Attenuated	3	4.10731	2.03819	4
72h_c3_NHP_1.5	SAMHD1	17.1996	72	NH/P68	Attenuated	3	0.692118	-0.530911	5
72h_c3_NHP_1.5	TIMP1	17.0501	72	NH/P68	Attenuated	3	1.80732	0.853852	2
72h_c3_NHP_1.5	RSAD2	18.8867	72	NH/P68	Attenuated	3	0.731252	-0.45156	6
72h_c3_NHP_1.5	CIITA	16.4181	72	NH/P68	Attenuated	3	0.996261	-0.00540478	1
72h_c3_NHP_1.5	STING	20.3501	72	NH/P68	Attenuated	3	0.281374	-1.82944	7
72h_c3_NHP_1.5	HSP70.2	22.505	72	NH/P68	Attenuated	3	2.48192	1.31146	6
72h_c3_NHP_1.5	CASP3	16.0039	72	NH/P68	Attenuated	3	0.898019	-0.155183	1
72h_c3_NHP_1.5	CXCL2	12.2715	72	NH/P68	Attenuated	3	0.765773	-0.385011	3
72h_c3_NHP_1.5	IFNAR1	15.625	72	NH/P68	Attenuated	3	0.760725	-0.394553	1
72h_c3_NHP_1.5	IL1B	14.5909	72	NH/P68	Attenuated	3	2.1985	1.13652	2
72h_c3_NHP_1.5	IRF3	15.6692	72	NH/P68	Attenuated	3	1.60211	0.679969	1
72h_c3_NHP_1.5	MX1	16.725	72	NH/P68	Attenuated	3	1.39645	0.481767	6
72h_c3_NHP_1.5	SCNN1B	999	72	NH/P68	Attenuated	3	1.66156e-199	-660.331
72h_c3_NHP_1.5	TLR3	19.503	72	NH/P68	Attenuated	3	0.265479	-1.91333	8
72h_c3_NHP_1.5	VNN2	18.6499	72	NH/P68	Attenuated	3	0.32885	-1.6045	7
72h_c3_NHP_1.5	SIGLEC1	14.3056	72	NH/P68	Attenuated	3	1.27424	0.34964	1
72h_c3_NHP_1.5	BANF1	13.7871	72	NH/P68	Attenuated	3	0.850195	-0.234134	1
72h_c3_NHP_1.5	SOCS3	999	72	NH/P68	Attenuated	3	1.36408e-101	-335.067
72h_c3_NHP_1.5	CCL2	15.876	72	NH/P68	Attenuated	3	1.69199	0.75872	3
72h_c3_NHP_1.5	CXCL8	12.4253	72	NH/P68	Attenuated	3	0.968274	-0.0465134	3
72h_c3_NHP_1.5	IL1RN	19.2876	72	NH/P68	Attenuated	3	0.534292	-0.904299	5
72h_c3_NHP_1.5	ISG15	15.4044	72	NH/P68	Attenuated	3	1.54742	0.629865	6
72h_c3_NHP_1.5	MYD88	13.7902	72	NH/P68	Attenuated	3	1.17272	0.229864	1
72h_c3_NHP_1.5	SIKE1	18.2795	72	NH/P68	Attenuated	3	0.507131	-0.979569	7
72h_c3_NHP_1.5	TLR4	13.5601	72	NH/P68	Attenuated	3	0.810089	-0.303848	1
72h_c3_NHP_1.5	RAB1B	15.2555	72	NH/P68	Attenuated	3	1.01047	0.015033	1
72h_c3_NHP_1.5	AXL	15.5323	72	NH/P68	Attenuated	3	1.55893	0.640556	5
72h_c3_NHP_1.5	OAS1	13.5343	72	NH/P68	Attenuated	3	1.0897	0.123931	5
72h_c3_NHP_1.5	TLR5	999	72	NH/P68	Attenuated	3	1.89124e-297	-985.693
72h_c3_NHP_1.5	CCL20	999	72	NH/P68	Attenuated	3	9.65615e-298	-986.663	3
72h_c3_NHP_1.5	DDIT3	15.5714	72	NH/P68	Attenuated	3	1.26551	0.33972	1
72h_c3_NHP_1.5	IFNG	23.2691	72	NH/P68	Attenuated	3	0.417952	-1.25859
72h_c3_NHP_1.5	IL23	19.6582	72	NH/P68	Attenuated	3	2.14797	1.10298	2
72h_c3_NHP_1.5	KDM6B	16.432	72	NH/P68	Attenuated	3	1.58178	0.66155	1
72h_c3_NHP_1.5	NFKB1	12.6659	72	NH/P68	Attenuated	3	1.45027	0.536322	5
72h_c3_NHP_1.5	STAT2	15.9737	72	NH/P68	Attenuated	3	1.03796	0.053753	5
72h_c3_NHP_1.5	TLR7	17.6289	72	NH/P68	Attenuated	3	0.410007	-1.28628	7
72h_c3_NHP_1.5	SLA-DMB	14.6042	72	NH/P68	Attenuated	3	0.691282	-0.532653	1
72h_c3_NHP_1.5	ZBP1	17.0921	72	NH/P68	Attenuated	3	1.34805	0.43087	6
72h_c3_NHP_1.5	CXCL9	999	72	NH/P68	Attenuated	3	0.000931796	-10.0677
72h_c3_NHP_1.5	CGAS	17.189	72	NH/P68	Attenuated	3	1.0485	0.0683296	5
72h_c3_NHP_1.5	NFKBIE	16.6534	72	NH/P68	Attenuated	3	0.826792	-0.274404	1
72h_c3_NHP_1.5	MAP3K7	17.8786	72	NH/P68	Attenuated	3	0.856511	-0.223456	1
72h_c3_NHP_1.5	IL27	20.4303	72	NH/P68	Attenuated	3	0.841307	-0.249296	8
72h_c3_NHP_1.5	IFNGR1	14.0198	72	NH/P68	Attenuated	3	0.936444	-0.0947347	1
72h_c3_NHP_1.5	EIF2AK2	14.8946	72	NH/P68	Attenuated	3	1.54323	0.625953	6
72h_c3_NHP_1.5	CCL4	17.9788	72	NH/P68	Attenuated	3	0.530453	-0.914703	3
72h_c3_NHP_1.5	SLA-DMA	14.5138	72	NH/P68	Attenuated	3	0.669363	-0.579139	1
72h_c3_NHP_1.5	CXCL10	19.0949	72	NH/P68	Attenuated	3	1.18016	0.238984	6
72h_c3_NHP_1.5	CD163	11.73	72	NH/P68	Attenuated	3	1.04178	0.0590503	1
72h_c3_NHP_1.5	PKR	14.775	72	NH/P68	Attenuated	3	1.51656	0.600799
72h_c3_NHP_1.5	TNF	17.8568	72	NH/P68	Attenuated	3	1.15565	0.208704	6
72h_c3_NHP_1.5	TBK1	15.4542	72	NH/P68	Attenuated	3	1.06683	0.093328	1
72h_c3_NHP_1.5	NFKBIZ	15.1503	72	NH/P68	Attenuated	3	0.712844	-0.488342	8
72h_c3_NHP_1.5	MAPK1	14.5321	72	NH/P68	Attenuated	3	0.854873	-0.226218	1
72h_c3_NHP_1.5	IL4R	15.3528	72	NH/P68	Attenuated	3	0.495095	-1.01422	1
72h_c3_NHP_1.5	IL10	23.3048	72	NH/P68	Attenuated	3	4.77006e+97	324.481
72h_c3_NHP_1.5	HSPA5	12.5726	72	NH/P68	Attenuated	3	1.43717	0.523227	5
72h_c3_NHP_1.5	CD14	16.9019	72	NH/P68	Attenuated	3	1.04422	0.0624224	1
72h_c3_NHP_1.5	PRKDC	20.1214	72	NH/P68	Attenuated	3	2.97505	1.57291	4
72h_c3_NHP_1.5	B2M	10.0516	72	NH/P68	Attenuated	3	0.472778	-1.08077	3
72h_c3_NHP_1.5	TIMD4	999	72	NH/P68	Attenuated	3	0.000931796	-10.0677
72h_c3_NHP_1.5	IFI16	20.613	72	NH/P68	Attenuated	3	0.636954	-0.65074	8
72h_c3_NHP_1.5	TNFAIP3	14.3443	72	NH/P68	Attenuated	3	0.977536	-0.0327779	5
72h_c3_NHP_1.5	TGFB1	12.8703	72	NH/P68	Attenuated	3	1.1093	0.149655	1
72h_c3_NHP_1.5	PBD-2	999	72	NH/P68	Attenuated	3	0.000931796	-10.0677
72h_c3_NHP_1.5	MAVS	18.1398	72	NH/P68	Attenuated	3	0.93981	-0.0895596	1
72h_c3_NHP_1.5	IL7	19.1874	72	NH/P68	Attenuated	3	0.670776	-0.576096	7
72h_c3_NHP_1.5	IL16	17.2064	72	NH/P68	Attenuated	3	0.659473	-0.600615	7
72h_c3_NHP_1.5	IFNB1	999	72	NH/P68	Attenuated	3	1.56509e-297	-985.966	6
72h_c3_NHP_1.5	CD4	999	72	NH/P68	Attenuated	3	8.45853e-200	-661.305
72h_c3_NHP_1.5	TLR9	999	72	NH/P68	Attenuated	3	1.15207e-199	-660.859
72h_c3_NHP_1.5	GAPDH	10.4542	72	NH/P68	Attenuated	3	0.871154	-0.199
72h_c3_NHP_1.5	NLRP3	23.3442	72	NH/P68	Attenuated	3	0.660027	-0.599404	2
72h_c3_NHP_1.5	SLFN11	19.0879	72	NH/P68	Attenuated	3	0.625425	-0.677092	6
72h_c3_NHP_1.5	TNFS10	17.8448	72	NH/P68	Attenuated	3	2.40749	1.26753	6
72h_c3_NHP_1.5	TGFBR1	14.849	72	NH/P68	Attenuated	3	0.926535	-0.110083	1
72h_c3_NHP_1.5	RIGI	15.9975	72	NH/P68	Attenuated	3	0.990916	-0.0131647	6
72h_c3_NHP_1.5	MCU	17.7018	72	NH/P68	Attenuated	3	3.40743	1.76868	4
72h_c3_NHP_1.5	IRAK1	16.3516	72	NH/P68	Attenuated	3	1.4725	0.558267	1
72h_c3_NHP_1.5	IL18	17.1941	72	NH/P68	Attenuated	3	0.478894	-1.06222	7
72h_c3_NHP_1.5	IFIT1	17.9284	72	NH/P68	Attenuated	3	0.683169	-0.549685	6
72h_c3_NHP_1.5	CSF2	21.0545	72	NH/P68	Attenuated	3	0.35791	-1.48233	2
72h_c3_NHP_1.5	SOD2	12.1482	72	NH/P68	Attenuated	3	0.444596	-1.16943	1
72h_c3_NHP_1.5	RPL19	11.2323	72	NH/P68	Attenuated	3	1.1779	0.236219
72h_c3_NHP_1.5	SNX32	21.8602	72	NH/P68	Attenuated	3	5.77119e+97	324.756
72h_c3_NHP_1.5	RXFAP	18.8562	72	NH/P68	Attenuated	3	1.03015	0.0428566	1
72h_c3_NHP_1.5	UNC93B1	14.3284	72	NH/P68	Attenuated	3	0.881987	-0.181171	6
72h_c3_NHP_1.5	TGIF2	21.0815	72	NH/P68	Attenuated	3	0.312975	-1.67588	8
8h_c2_881_0.5	C3	11.5353	8	OURT88/1	Virulent	2	0.678332	-0.559936	1
8h_c2_881_0.5	CSF3	18.971	8	OURT88/1	Virulent	2	2.487	1.31441	2
8h_c2_881_0.5	IL1A	14.5464	8	OURT88/1	Virulent	2	0.400029	-1.32182	3
8h_c2_881_0.5	IRAK4	14.991	8	OURT88/1	Virulent	2	0.71718	-0.479594	1
8h_c2_881_0.5	IFNA1	20.7617	8	OURT88/1	Virulent	2	1.78571	0.836494	4
8h_c2_881_0.5	SAMHD1	16.995	8	OURT88/1	Virulent	2	0.418163	-1.25786	5
8h_c2_881_0.5	TIMP1	17.4687	8	OURT88/1	Virulent	2	0.708913	-0.49632	2
8h_c2_881_0.5	RSAD2	17.5039	8	OURT88/1	Virulent	2	0.999745	-0.000367769	6
8h_c2_881_0.5	CIITA	16.3614	8	OURT88/1	Virulent	2	0.543262	-0.880279	1
8h_c2_881_0.5	STING	18.6783	8	OURT88/1	Virulent	2	0.469996	-1.08928	7
8h_c2_881_0.5	HSP70.2	22.5392	8	OURT88/1	Virulent	2	1.27077	0.345699	6
8h_c2_881_0.5	CASP3	15.4732	8	OURT88/1	Virulent	2	0.680167	-0.556039	1
8h_c2_881_0.5	CXCL2	12.1911	8	OURT88/1	Virulent	2	0.4245	-1.23616	3
8h_c2_881_0.5	IFNAR1	15.1441	8	OURT88/1	Virulent	2	0.556611	-0.845259	1
8h_c2_881_0.5	IL1B	15.8062	8	OURT88/1	Virulent	2	0.496411	-1.01039	2
8h_c2_881_0.5	IRF3	15.8869	8	OURT88/1	Virulent	2	0.722298	-0.469334	1
8h_c2_881_0.5	MX1	17.4743	8	OURT88/1	Virulent	2	0.43554	-1.19912	6
8h_c2_881_0.5	SCNN1B	999	8	OURT88/1	Virulent	2	1.66156e-199	-660.331
8h_c2_881_0.5	TLR3	18.1738	8	OURT88/1	Virulent	2	0.349748	-1.51561	8
8h_c2_881_0.5	VNN2	16.7611	8	OURT88/1	Virulent	2	0.63849	-0.647264	7
8h_c2_881_0.5	SIGLEC1	13.7746	8	OURT88/1	Virulent	2	0.965361	-0.05086	1
8h_c2_881_0.5	BANF1	12.6682	8	OURT88/1	Virulent	2	0.968061	-0.0468307	1
8h_c2_881_0.5	SOCS3	999	8	OURT88/1	Virulent	2	1.36408e-101	-335.067
8h_c2_881_0.5	CCL2	15.5042	8	OURT88/1	Virulent	2	1.14786	0.198945	3
8h_c2_881_0.5	CXCL8	11.6796	8	OURT88/1	Virulent	2	0.851233	-0.232373	3
8h_c2_881_0.5	IL1RN	18.9589	8	OURT88/1	Virulent	2	0.351799	-1.50718	5
8h_c2_881_0.5	ISG15	15.5159	8	OURT88/1	Virulent	2	0.750984	-0.413147	6
8h_c2_881_0.5	MYD88	13.5457	8	OURT88/1	Virulent	2	0.728358	-0.45728	1
8h_c2_881_0.5	SIKE1	16.6094	8	OURT88/1	Virulent	2	0.846135	-0.241041	7
8h_c2_881_0.5	TLR4	13.2207	8	OURT88/1	Virulent	2	0.537388	-0.895965	1
8h_c2_881_0.5	RAB1B	14.4944	8	OURT88/1	Virulent	2	0.897873	-0.155417	1
8h_c2_881_0.5	AXL	16.4016	8	OURT88/1	Virulent	2	0.447434	-1.16025	5
8h_c2_881_0.5	OAS1	14.377	8	OURT88/1	Virulent	2	0.318566	-1.65033	5
8h_c2_881_0.5	TLR5	999	8	OURT88/1	Virulent	2	1.89124e-297	-985.693
8h_c2_881_0.5	CCL20	22.007	8	OURT88/1	Virulent	2	1.18224	0.241519	3
8h_c2_881_0.5	DDIT3	14.7551	8	OURT88/1	Virulent	2	1.16836	0.22449	1
8h_c2_881_0.5	IFNG	999	8	OURT88/1	Virulent	2	4.29265e-298	-987.833
8h_c2_881_0.5	IL23	19.2731	8	OURT88/1	Virulent	2	1.47065	0.556453	2
8h_c2_881_0.5	KDM6B	16.956	8	OURT88/1	Virulent	2	0.576743	-0.794001	1
8h_c2_881_0.5	NFKB1	13.1225	8	OURT88/1	Virulent	2	0.554055	-0.851899	5
8h_c2_881_0.5	STAT2	15.8411	8	OURT88/1	Virulent	2	0.596575	-0.745225	5
8h_c2_881_0.5	TLR7	16.6993	8	OURT88/1	Virulent	2	0.409434	-1.2883	7
8h_c2_881_0.5	SLA-DMB	13.4501	8	OURT88/1	Virulent	2	0.806588	-0.310097	1
8h_c2_881_0.5	ZBP1	17.2674	8	OURT88/1	Virulent	2	0.625938	-0.675909	6
8h_c2_881_0.5	CXCL9	999	8	OURT88/1	Virulent	2	0.000931796	-10.0677
8h_c2_881_0.5	CGAS	17.5349	8	OURT88/1	Virulent	2	0.432514	-1.20918	5
8h_c2_881_0.5	NFKBIE	16.0923	8	OURT88/1	Virulent	2	0.63956	-0.644848	1
8h_c2_881_0.5	MAP3K7	17.1439	8	OURT88/1	Virulent	2	0.747289	-0.420262	1
8h_c2_881_0.5	IL27	19.3229	8	OURT88/1	Virulent	2	0.950332	-0.0734958	8
8h_c2_881_0.5	IFNGR1	13.4373	8	OURT88/1	Virulent	2	0.735227	-0.443738	1
8h_c2_881_0.5	EIF2AK2	14.7599	8	OURT88/1	Virulent	2	0.888321	-0.170846	6
8h_c2_881_0.5	CCL4	15.1604	8	OURT88/1	Virulent	2	1.96176	0.972148	3
8h_c2_881_0.5	SLA-DMA	13.8511	8	OURT88/1	Virulent	2	0.555565	-0.847971	1
8h_c2_881_0.5	CXCL10	18.4633	8	OURT88/1	Virulent	2	0.958606	-0.0609906	6
8h_c2_881_0.5	CD163	11.659	8	OURT88/1	Virulent	2	0.573769	-0.801459	1
8h_c2_881_0.5	PKR	14.9638	8	OURT88/1	Virulent	2	0.697609	-0.51951
8h_c2_881_0.5	TNF	17.3048	8	OURT88/1	Virulent	2	0.888328	-0.170835	6
8h_c2_881_0.5	TBK1	15.1762	8	OURT88/1	Virulent	2	0.678196	-0.560227	1
8h_c2_881_0.5	NFKBIZ	15.2182	8	OURT88/1	Virulent	2	0.35655	-1.48782	8
8h_c2_881_0.5	MAPK1	13.1287	8	OURT88/1	Virulent	2	1.18566	0.245695	1
8h_c2_881_0.5	IL4R	15.0013	8	OURT88/1	Virulent	2	0.33119	-1.59427	1
8h_c2_881_0.5	IL10	20.3896	8	OURT88/1	Virulent	2	1.88653e+98	326.465
8h_c2_881_0.5	HSPA5	12.7839	8	OURT88/1	Virulent	2	0.650848	-0.619607	5
8h_c2_881_0.5	CD14	16.4241	8	OURT88/1	Virulent	2	0.762464	-0.391259	1
8h_c2_881_0.5	PRKDC	20.4297	8	OURT88/1	Virulent	2	1.25967	0.333043	4
8h_c2_881_0.5	B2M	7.284	8	OURT88/1	Virulent	2	1.68794	0.755263	3
8h_c2_881_0.5	TIMD4	999	8	OURT88/1	Virulent	2	0.000931796	-10.0677
8h_c2_881_0.5	IFI16	19.7573	8	OURT88/1	Virulent	2	0.604333	-0.726583	8
8h_c2_881_0.5	TNFAIP3	13.9073	8	OURT88/1	Virulent	2	0.693845	-0.527315	5
8h_c2_881_0.5	TGFB1	12.3151	8	OURT88/1	Virulent	2	0.854605	-0.226671	1
8h_c2_881_0.5	PBD-2	999	8	OURT88/1	Virulent	2	0.000931796	-10.0677
8h_c2_881_0.5	MAVS	17.2866	8	OURT88/1	Virulent	2	0.890106	-0.167952	1
8h_c2_881_0.5	IL7	17.7678	8	OURT88/1	Virulent	2	0.940767	-0.088091	7
8h_c2_881_0.5	IL16	16.0045	8	OURT88/1	Virulent	2	0.795344	-0.330349	7
8h_c2_881_0.5	IFNB1	21.5014	8	OURT88/1	Virulent	2	2.7206	1.44393	6
8h_c2_881_0.5	CD4	999	8	OURT88/1	Virulent	2	8.45853e-200	-661.305
8h_c2_881_0.5	TLR9	999	8	OURT88/1	Virulent	2	1.15207e-199	-660.859
8h_c2_881_0.5	GAPDH	9.37387	8	OURT88/1	Virulent	2	0.965746	-0.0502839
8h_c2_881_0.5	NLRP3	999	8	OURT88/1	Virulent	2	7.1408e-298	-987.098	2
8h_c2_881_0.5	SLFN11	17.7192	8	OURT88/1	Virulent	2	0.846749	-0.239994	6
8h_c2_881_0.5	TNFS10	19.4462	8	OURT88/1	Virulent	2	0.415962	-1.26548	6
8h_c2_881_0.5	TGFBR1	14.0789	8	OURT88/1	Virulent	2	0.828452	-0.271511	1
8h_c2_881_0.5	RIGI	15.7167	8	OURT88/1	Virulent	2	0.631158	-0.663927	6
8h_c2_881_0.5	MCU	18.1167	8	OURT88/1	Virulent	2	1.34001	0.422247	4
8h_c2_881_0.5	IRAK1	15.8594	8	OURT88/1	Virulent	2	1.0859	0.118887	1
8h_c2_881_0.5	IL18	15.7573	8	OURT88/1	Virulent	2	0.679742	-0.55694	7
8h_c2_881_0.5	IFIT1	16.5532	8	OURT88/1	Virulent	2	0.929125	-0.106055	6
8h_c2_881_0.5	CSF2	18.8114	8	OURT88/1	Virulent	2	0.888393	-0.170729	2
8h_c2_881_0.5	SOD2	10.2457	8	OURT88/1	Virulent	2	0.871465	-0.198485	1
8h_c2_881_0.5	RPL19	10.4495	8	OURT88/1	Virulent	2	1.06253	0.0875027
8h_c2_881_0.5	SNX32	23.5075	8	OURT88/1	Virulent	2	9.65888e+96	322.177
8h_c2_881_0.5	RXFAP	18.8222	8	OURT88/1	Virulent	2	0.552955	-0.854766	1
8h_c2_881_0.5	UNC93B1	13.6061	8	OURT88/1	Virulent	2	0.762877	-0.390478	6
8h_c2_881_0.5	TGIF2	19.7062	8	OURT88/1	Virulent	2	0.425682	-1.23215	8
48h_c1_881_1.5	C3	14.3328	48	OURT88/1	Virulent	1	0.304581	-1.7151	1
48h_c1_881_1.5	CSF3	999	48	OURT88/1	Virulent	1	2.47658e-298	-988.626	2
48h_c1_881_1.5	IL1A	18.4428	48	OURT88/1	Virulent	1	0.0838584	-3.5759	3
48h_c1_881_1.5	IRAK4	17.7321	48	OURT88/1	Virulent	1	0.334866	-1.57835	1
48h_c1_881_1.5	IFNA1	999	48	OURT88/1	Virulent	1	6.15214e-298	-987.313	4
48h_c1_881_1.5	SAMHD1	18.965	48	OURT88/1	Virulent	1	0.333191	-1.58558	5
48h_c1_881_1.5	TIMP1	19.3126	48	OURT88/1	Virulent	1	0.616458	-0.697925	2
48h_c1_881_1.5	RSAD2	18.694	48	OURT88/1	Virulent	1	1.36782	0.451874	6
48h_c1_881_1.5	CIITA	20.4989	48	OURT88/1	Virulent	1	0.0963571	-3.37546	1
48h_c1_881_1.5	STING	21.7072	48	OURT88/1	Virulent	1	0.179764	-2.47582	7
48h_c1_881_1.5	HSP70.2	25.1852	48	OURT88/1	Virulent	1	0.633748	-0.658019	6
48h_c1_881_1.5	CASP3	18.6172	48	OURT88/1	Virulent	1	0.24019	-2.05775	1
48h_c1_881_1.5	CXCL2	15.7983	48	OURT88/1	Virulent	1	0.108735	-3.20111	3
48h_c1_881_1.5	IFNAR1	18.0752	48	OURT88/1	Virulent	1	0.227812	-2.13408	1
48h_c1_881_1.5	IL1B	24.1749	48	OURT88/1	Virulent	1	0.00468812	-7.73677	2
48h_c1_881_1.5	IRF3	18.938	48	OURT88/1	Virulent	1	0.272035	-1.87813	1
48h_c1_881_1.5	MX1	17.822	48	OURT88/1	Virulent	1	1.06841	0.0954718	6
48h_c1_881_1.5	SCNN1B	999	48	OURT88/1	Virulent	1	1.66156e-199	-660.331
48h_c1_881_1.5	TLR3	21.3152	48	OURT88/1	Virulent	1	0.123729	-3.01474	8
48h_c1_881_1.5	VNN2	20.2713	48	OURT88/1	Virulent	1	0.174926	-2.51519	7
48h_c1_881_1.5	SIGLEC1	16.3984	48	OURT88/1	Virulent	1	0.488891	-1.03242	1
48h_c1_881_1.5	BANF1	14.9634	48	OURT88/1	Virulent	1	0.615678	-0.699753	1
48h_c1_881_1.5	SOCS3	999	48	OURT88/1	Virulent	1	1.36408e-101	-335.067
48h_c1_881_1.5	CCL2	19.0589	48	OURT88/1	Virulent	1	0.304943	-1.71339	3
48h_c1_881_1.5	CXCL8	14.645	48	OURT88/1	Virulent	1	0.340215	-1.55548	3
48h_c1_881_1.5	IL1RN	20.3921	48	OURT88/1	Virulent	1	0.406672	-1.29806	5
48h_c1_881_1.5	ISG15	17.2312	48	OURT88/1	Virulent	1	0.713911	-0.486184	6
48h_c1_881_1.5	MYD88	16.85	48	OURT88/1	Virulent	1	0.230166	-2.11926	1
48h_c1_881_1.5	SIKE1	22.4715	48	OURT88/1	Virulent	1	0.0454101	-4.46084	7
48h_c1_881_1.5	TLR4	17.3599	48	OURT88/1	Virulent	1	0.0951998	-3.3929	1
48h_c1_881_1.5	RAB1B	17.0456	48	OURT88/1	Virulent	1	0.478178	-1.06438	1
48h_c1_881_1.5	AXL	19.694	48	OURT88/1	Virulent	1	0.14256	-2.81036	5
48h_c1_881_1.5	OAS1	15.7134	48	OURT88/1	Virulent	1	0.393807	-1.34444	5
48h_c1_881_1.5	TLR5	999	48	OURT88/1	Virulent	1	1.89124e-297	-985.693
48h_c1_881_1.5	CCL20	999	48	OURT88/1	Virulent	1	9.65615e-298	-986.663	3
48h_c1_881_1.5	DDIT3	19.4124	48	OURT88/1	Virulent	1	0.144529	-2.79057	1
48h_c1_881_1.5	IFNG	23.349	48	OURT88/1	Virulent	1	0.647194	-0.627729
48h_c1_881_1.5	IL23	999	48	OURT88/1	Virulent	1	1.8056e-298	-989.082	2
48h_c1_881_1.5	KDM6B	20.2905	48	OURT88/1	Virulent	1	0.178479	-2.48617	1
48h_c1_881_1.5	NFKB1	17.5242	48	OURT88/1	Virulent	1	0.0818282	-3.61126	5
48h_c1_881_1.5	STAT2	18.3579	48	OURT88/1	Virulent	1	0.32541	-1.61967	5
48h_c1_881_1.5	TLR7	19.4914	48	OURT88/1	Virulent	1	0.184535	-2.43804	7
48h_c1_881_1.5	SLA-DMB	16.3431	48	OURT88/1	Virulent	1	0.338963	-1.5608	1
48h_c1_881_1.5	ZBP1	18.1773	48	OURT88/1	Virulent	1	1.03989	0.0564258	6
48h_c1_881_1.5	CXCL9	999	48	OURT88/1	Virulent	1	0.000931796	-10.0677
48h_c1_881_1.5	CGAS	20.2376	48	OURT88/1	Virulent	1	0.207394	-2.26955	5
48h_c1_881_1.5	NFKBIE	19.5083	48	OURT88/1	Virulent	1	0.187047	-2.41853	1
48h_c1_881_1.5	MAP3K7	19.3649	48	OURT88/1	Virulent	1	0.50036	-0.998961	1
48h_c1_881_1.5	IL27	22.9941	48	OURT88/1	Virulent	1	0.232867	-2.10242	8
48h_c1_881_1.5	IFNGR1	16.7295	48	OURT88/1	Virulent	1	0.234279	-2.0937	1
48h_c1_881_1.5	EIF2AK2	16.4588	48	OURT88/1	Virulent	1	0.854138	-0.227458	6
48h_c1_881_1.5	CCL4	18.6711	48	OURT88/1	Virulent	1	0.537292	-0.896222	3
48h_c1_881_1.5	SLA-DMA	16.3786	48	OURT88/1	Virulent	1	0.300793	-1.73316	1
48h_c1_881_1.5	CXCL10	22.31	48	OURT88/1	Virulent	1	0.20799	-2.26542	6
48h_c1_881_1.5	CD163	16.0921	48	OURT88/1	Virulent	1	0.0829139	-3.59224	1
48h_c1_881_1.5	PKR	15.2186	48	OURT88/1	Virulent	1	1.82507	0.867949
48h_c1_881_1.5	TNF	20.6624	48	OURT88/1	Virulent	1	0.270527	-1.88616	6
48h_c1_881_1.5	TBK1	17.9756	48	OURT88/1	Virulent	1	0.304103	-1.71737	1
48h_c1_881_1.5	NFKBIZ	20.8797	48	OURT88/1	Virulent	1	0.021989	-5.50707	8
48h_c1_881_1.5	MAPK1	15.8669	48	OURT88/1	Virulent	1	0.554684	-0.850263	1
48h_c1_881_1.5	IL4R	19.6539	48	OURT88/1	Virulent	1	0.0411015	-4.60466	1
48h_c1_881_1.5	IL10	23.3575	48	OURT88/1	Virulent	1	7.52674e+97	325.139
48h_c1_881_1.5	HSPA5	15.3148	48	OURT88/1	Virulent	1	0.351538	-1.50825	5
48h_c1_881_1.5	CD14	20.5174	48	OURT88/1	Virulent	1	0.139434	-2.84235	1
48h_c1_881_1.5	PRKDC	21.4226	48	OURT88/1	Virulent	1	1.97588	0.982495	4
48h_c1_881_1.5	B2M	10.4107	48	OURT88/1	Virulent	1	0.603279	-0.729104	3
48h_c1_881_1.5	TIMD4	999	48	OURT88/1	Virulent	1	0.000931796	-10.0677
48h_c1_881_1.5	IFI16	999	48	OURT88/1	Virulent	1	1.03787e-298	-989.881	8
48h_c1_881_1.5	TNFAIP3	16.7015	48	OURT88/1	Virulent	1	0.312253	-1.67921	5
48h_c1_881_1.5	TGFB1	14.3082	48	OURT88/1	Virulent	1	0.670161	-0.577421	1
48h_c1_881_1.5	PBD-2	999	48	OURT88/1	Virulent	1	0.000931796	-10.0677
48h_c1_881_1.5	MAVS	21.4657	48	OURT88/1	Virulent	1	0.153386	-2.70476	1
48h_c1_881_1.5	IL7	22.9002	48	OURT88/1	Virulent	1	0.0837288	-3.57813	7
48h_c1_881_1.5	IL16	24.034	48	OURT88/1	Virulent	1	0.00950245	-6.71749	7
48h_c1_881_1.5	IFNB1	21.5661	48	OURT88/1	Virulent	1	8.12025	3.02152	6
48h_c1_881_1.5	CD4	999	48	OURT88/1	Virulent	1	8.45853e-200	-661.305
48h_c1_881_1.5	TLR9	999	48	OURT88/1	Virulent	1	1.15207e-199	-660.859
48h_c1_881_1.5	GAPDH	11.0323	48	OURT88/1	Virulent	1	0.955025	-0.0663897
48h_c1_881_1.5	NLRP3	999	48	OURT88/1	Virulent	1	7.1408e-298	-987.098	2
48h_c1_881_1.5	SLFN11	21.5384	48	OURT88/1	Virulent	1	0.18726	-2.41688	6
48h_c1_881_1.5	TNFS10	999	48	OURT88/1	Virulent	1	5.75798e-299	-990.731	6
48h_c1_881_1.5	TGFBR1	18.3874	48	OURT88/1	Virulent	1	0.13052	-2.93765	1
48h_c1_881_1.5	RIGI	18.1774	48	OURT88/1	Virulent	1	0.357911	-1.48233	6
48h_c1_881_1.5	MCU	21.2362	48	OURT88/1	Virulent	1	0.481318	-1.05494	4
48h_c1_881_1.5	IRAK1	18.4163	48	OURT88/1	Virulent	1	0.576071	-0.795682	1
48h_c1_881_1.5	IL18	19.2435	48	OURT88/1	Virulent	1	0.189346	-2.40091	7
48h_c1_881_1.5	IFIT1	21.5711	48	OURT88/1	Virulent	1	0.0895158	-3.48171	6
48h_c1_881_1.5	CSF2	21.2202	48	OURT88/1	Virulent	1	0.522218	-0.937275	2
48h_c1_881_1.5	SOD2	14.6616	48	OURT88/1	Virulent	1	0.127438	-2.97214	1
48h_c1_881_1.5	RPL19	12.0757	48	OURT88/1	Virulent	1	1.07446	0.103608
48h_c1_881_1.5	SNX32	22.1622	48	OURT88/1	Virulent	1	7.66127e+97	325.165
48h_c1_881_1.5	RXFAP	24.3587	48	OURT88/1	Virulent	1	0.03719	-4.74894	1
48h_c1_881_1.5	UNC93B1	16.1931	48	OURT88/1	Virulent	1	0.39635	-1.33515	6
48h_c1_881_1.5	TGIF2	999	48	OURT88/1	Virulent	1	7.05611e-299	-990.438	8
4h_c3_881_1.5	C3	11.2723	4	OURT88/1	Virulent	3	1.11935	0.162664	1
4h_c3_881_1.5	CSF3	21.941	4	OURT88/1	Virulent	3	0.436477	-1.19602	2
4h_c3_881_1.5	IL1A	14.9391	4	OURT88/1	Virulent	3	0.419001	-1.25497	3
4h_c3_881_1.5	IRAK4	15.5728	4	OURT88/1	Virulent	3	0.658918	-0.601829	1
4h_c3_881_1.5	IFNA1	999	4	OURT88/1	Virulent	3	6.15214e-298	-987.313	4
4h_c3_881_1.5	SAMHD1	17.4678	4	OURT88/1	Virulent	3	0.414336	-1.27113	5
4h_c3_881_1.5	TIMP1	20.0985	4	OURT88/1	Virulent	3	0.157499	-2.66658	2
4h_c3_881_1.5	RSAD2	17.2634	4	OURT88/1	Virulent	3	1.62418	0.699708	6
4h_c3_881_1.5	CIITA	15.8805	4	OURT88/1	Virulent	3	1.04266	0.0602688	1
4h_c3_881_1.5	STING	19.4031	4	OURT88/1	Virulent	3	0.391073	-1.35449	7
4h_c3_881_1.5	HSP70.2	24.5851	4	OURT88/1	Virulent	3	0.423172	-1.24069	6
4h_c3_881_1.5	CASP3	16.2097	4	OURT88/1	Virulent	3	0.56137	-0.832976	1
4h_c3_881_1.5	CXCL2	13.1211	4	OURT88/1	Virulent	3	0.306382	-1.7066	3
4h_c3_881_1.5	IFNAR1	15.2071	4	OURT88/1	Virulent	3	0.732703	-0.4487	1
4h_c3_881_1.5	IL1B	16.5368	4	OURT88/1	Virulent	3	0.411382	-1.28145	2
4h_c3_881_1.5	IRF3	16.3737	4	OURT88/1	Virulent	3	0.708837	-0.496475	1
4h_c3_881_1.5	MX1	16.2248	4	OURT88/1	Virulent	3	1.42399	0.509943	6
4h_c3_881_1.5	SCNN1B	999	4	OURT88/1	Virulent	3	1.66156e-199	-660.331
4h_c3_881_1.5	TLR3	17.6262	4	OURT88/1	Virulent	3	0.70296	-0.508486	8
4h_c3_881_1.5	VNN2	16.7769	4	OURT88/1	Virulent	3	0.868426	-0.203525	7
4h_c3_881_1.5	SIGLEC1	14.1678	4	OURT88/1	Virulent	3	1.01078	0.0154755	1
4h_c3_881_1.5	BANF1	13.2171	4	OURT88/1	Virulent	3	0.909934	-0.136166	1
4h_c3_881_1.5	SOCS3	999	4	OURT88/1	Virulent	3	1.36408e-101	-335.067
4h_c3_881_1.5	CCL2	17.2722	4	OURT88/1	Virulent	3	0.463464	-1.10947	3
4h_c3_881_1.5	CXCL8	12.6087	4	OURT88/1	Virulent	3	0.614779	-0.701859	3
[truncated: 5,051 more rows]
